# Supplementary material for: The impact of pesticides used at the agricultural land of the Puck commune on the environment of the Puck Bay
Source: PeerJ. 2020 Mar 19;8:e8789. doi: 10.7717/peerj.8789 (PMC7085897; doi:10.7717/peerj.8789)
Supplement: Supplemental Information 1 [file peerj-08-8789-s001.xlsx]

## Sheet: wyniki ok
Farmer's name	No. of farmer	No. of farmer (IMG)	Parcel	Laboratory code	No. of parcel	Data of sampling	Data of analyse	Parameter	Unit	LOQ	Result	+/-	Uncertainty	Result < LOQ	Analyst	Analytical method	Area [ha]	longitudeA	latitudeA	longitudeB	latitudeB	longitudeC	latitudeC	longitudeD	latitudeD
Stanisłw Selke	7	12	12_66_w2	86/18/892	12_66	2018-03-26	2018-05-16	2,4,5-T-Methylester	mg/kg	0.03	p.0,03			1	Eurofins	SFBA0-7	5.37	54.678734	18.342915	54.678813	18.346460	54.676754	18.348094	54.677199	18.343460
Stanisłw Selke	7	12	12_66_w2	86/18/892	12_66	2018-03-26	2018-05-16	2,4-D-Methylester	mg/kg	0.03	p.0,03			1	Eurofins	SFBA0-7	5.37	54.678734	18.342915	54.678813	18.346460	54.676754	18.348094	54.677199	18.343460
Stanisłw Selke	7	12	12_66_w2	86/18/892	12_66	2018-03-26	2018-05-16	Acetochlor	mg/kg	0.15	p.0,15			1	Eurofins	SFBA0-7	5.37	54.678734	18.342915	54.678813	18.346460	54.676754	18.348094	54.677199	18.343460
Stanisłw Selke	7	12	12_66_w2	86/18/892	12_66	2018-03-26	2018-05-16	Aclonifen	mg/kg	0.06	p.0,06			1	Eurofins	SFBA0-7	5.37	54.678734	18.342915	54.678813	18.346460	54.676754	18.348094	54.677199	18.343460
Stanisłw Selke	7	12	12_66_w2	86/18/892	12_66	2018-03-26	2018-05-16	Akrynatryna	mg/kg	0.03	p.0,03			1	Eurofins	SFBA0-7	5.37	54.678734	18.342915	54.678813	18.346460	54.676754	18.348094	54.677199	18.343460
Stanisłw Selke	7	12	12_66_w2	86/18/892	12_66	2018-03-26	2018-05-16	Alachlor	mg/kg	0.03	p.0,03			1	Eurofins	SFBA0-7	5.37	54.678734	18.342915	54.678813	18.346460	54.676754	18.348094	54.677199	18.343460
Stanisłw Selke	7	12	12_66_w2	86/18/892	12_66	2018-03-26	2018-05-16	Aldryna	mg/kg	0.015	p.0,015			1	Eurofins	SFBA0-7	5.37	54.678734	18.342915	54.678813	18.346460	54.676754	18.348094	54.677199	18.343460
Stanisłw Selke	7	12	12_66_w2	86/18/892	12_66	2018-03-26	2018-05-16	Aldryna+Dieldryna	mg/kg	0.015	p.0,015			1	Eurofins	SFBA0-7	5.37	54.678734	18.342915	54.678813	18.346460	54.676754	18.348094	54.677199	18.343460
Stanisłw Selke	7	12	12_66_w2	86/18/892	12_66	2018-03-26	2018-05-16	Alletryna	mg/kg	0.03	p.0,03			1	Eurofins	SFBA0-7	5.37	54.678734	18.342915	54.678813	18.346460	54.676754	18.348094	54.677199	18.343460
Stanisłw Selke	7	12	12_66_w2	86/18/892	12_66	2018-03-26	2018-05-16	Amidithion	mg/kg	0.03	p.0,03			1	Eurofins	SFBA0-7	5.37	54.678734	18.342915	54.678813	18.346460	54.676754	18.348094	54.677199	18.343460
Stanisłw Selke	7	12	12_66_w2	86/18/892	12_66	2018-03-26	2018-05-16	Antrachinon	mg/kg	0.06	p.0,06			1	Eurofins	SFBA0-7	5.37	54.678734	18.342915	54.678813	18.346460	54.676754	18.348094	54.677199	18.343460
Stanisłw Selke	7	12	12_66_w2	86/18/892	12_66	2018-03-26	2018-05-16	Atrazyna	mg/kg	0.15	p.0,15			1	Eurofins	SFBA0-7	5.37	54.678734	18.342915	54.678813	18.346460	54.676754	18.348094	54.677199	18.343460
Stanisłw Selke	7	12	12_66_w2	86/18/892	12_66	2018-03-26	2018-05-16	Azakonazol	mg/kg	0.03	p.0,03			1	Eurofins	SFBA0-7	5.37	54.678734	18.342915	54.678813	18.346460	54.676754	18.348094	54.677199	18.343460
Stanisłw Selke	7	12	12_66_w2	86/18/892	12_66	2018-03-26	2018-05-16	Azynofos etylowy	mg/kg	0.03	p.0,03			1	Eurofins	SFBA0-7	5.37	54.678734	18.342915	54.678813	18.346460	54.676754	18.348094	54.677199	18.343460
Stanisłw Selke	7	12	12_66_w2	86/18/892	12_66	2018-03-26	2018-05-16	Azynofos metylowy	mg/kg	0.03	p.0,03			1	Eurofins	SFBA0-7	5.37	54.678734	18.342915	54.678813	18.346460	54.676754	18.348094	54.677199	18.343460
Stanisłw Selke	7	12	12_66_w2	86/18/892	12_66	2018-03-26	2018-05-16	Azoksystrobina	mg/kg	0.03	p.0,03			1	Eurofins	SFBA0-7	5.37	54.678734	18.342915	54.678813	18.346460	54.676754	18.348094	54.677199	18.343460
Stanisłw Selke	7	12	12_66_w2	86/18/892	12_66	2018-03-26	2018-05-16	Benfluralin	mg/kg	0.015	p.0,015			1	Eurofins	SFBA0-7	5.37	54.678734	18.342915	54.678813	18.346460	54.676754	18.348094	54.677199	18.343460
Stanisłw Selke	7	12	12_66_w2	86/18/892	12_66	2018-03-26	2018-05-16	Benoxacor	mg/kg	0.03	p.0,03			1	Eurofins	SFBA0-7	5.37	54.678734	18.342915	54.678813	18.346460	54.676754	18.348094	54.677199	18.343460
Stanisłw Selke	7	12	12_66_w2	86/18/892	12_66	2018-03-26	2018-05-16	Benzoylprop-ethyl	mg/kg	0.15	p.0,15			1	Eurofins	SFBA0-7	5.37	54.678734	18.342915	54.678813	18.346460	54.676754	18.348094	54.677199	18.343460
Stanisłw Selke	7	12	12_66_w2	86/18/892	12_66	2018-03-26	2018-05-16	Biofenox	mg/kg	0.03	p.0,03			1	Eurofins	SFBA0-7	5.37	54.678734	18.342915	54.678813	18.346460	54.676754	18.348094	54.677199	18.343460
Stanisłw Selke	7	12	12_66_w2	86/18/892	12_66	2018-03-26	2018-05-16	Binapacryl	mg/kg	0.015	p.0,015			1	Eurofins	SFBA0-7	5.37	54.678734	18.342915	54.678813	18.346460	54.676754	18.348094	54.677199	18.343460
Stanisłw Selke	7	12	12_66_w2	86/18/892	12_66	2018-03-26	2018-05-16	Bifentryna	mg/kg	0.06	p.0,06			1	Eurofins	SFBA0-7	5.37	54.678734	18.342915	54.678813	18.346460	54.676754	18.348094	54.677199	18.343460
Stanisłw Selke	7	12	12_66_w2	86/18/892	12_66	2018-03-26	2018-05-16	Bitertanol	mg/kg	0.15	p.0,15			1	Eurofins	SFBA0-7	5.37	54.678734	18.342915	54.678813	18.346460	54.676754	18.348094	54.677199	18.343460
Stanisłw Selke	7	12	12_66_w2	86/18/892	12_66	2018-03-26	2018-05-16	Boskalid	mg/kg	0.09	p.0,09			1	Eurofins	SFBA0-7	5.37	54.678734	18.342915	54.678813	18.346460	54.676754	18.348094	54.677199	18.343460
Stanisłw Selke	7	12	12_66_w2	86/18/892	12_66	2018-03-26	2018-05-16	Bromofenvinphos	mg/kg	0.03	p.0,03			1	Eurofins	SFBA0-7	5.37	54.678734	18.342915	54.678813	18.346460	54.676754	18.348094	54.677199	18.343460
Stanisłw Selke	7	12	12_66_w2	86/18/892	12_66	2018-03-26	2018-05-16	Bromocyclen	mg/kg	0.03	p.0,03			1	Eurofins	SFBA0-7	5.37	54.678734	18.342915	54.678813	18.346460	54.676754	18.348094	54.677199	18.343460
Stanisłw Selke	7	12	12_66_w2	86/18/892	12_66	2018-03-26	2018-05-16	Bromofos metylowy	mg/kg	0.015	p.0,015			1	Eurofins	SFBA0-7	5.37	54.678734	18.342915	54.678813	18.346460	54.676754	18.348094	54.677199	18.343460
Stanisłw Selke	7	12	12_66_w2	86/18/892	12_66	2018-03-26	2018-05-16	Bromofos etylowy	mg/kg	0.015	p.0,015			1	Eurofins	SFBA0-7	5.37	54.678734	18.342915	54.678813	18.346460	54.676754	18.348094	54.677199	18.343460
Stanisłw Selke	7	12	12_66_w2	86/18/892	12_66	2018-03-26	2018-05-16	Bromopropylat	mg/kg	0.03	p.0,03			1	Eurofins	SFBA0-7	5.37	54.678734	18.342915	54.678813	18.346460	54.676754	18.348094	54.677199	18.343460
Stanisłw Selke	7	12	12_66_w2	86/18/892	12_66	2018-03-26	2018-05-16	Buprofezyna	mg/kg	0.15	p.0,15			1	Eurofins	SFBA0-7	5.37	54.678734	18.342915	54.678813	18.346460	54.676754	18.348094	54.677199	18.343460
Stanisłw Selke	7	12	12_66_w2	86/18/892	12_66	2018-03-26	2018-05-16	Butachlor	mg/kg	0.03	p.0,03			1	Eurofins	SFBA0-7	5.37	54.678734	18.342915	54.678813	18.346460	54.676754	18.348094	54.677199	18.343460
Stanisłw Selke	7	12	12_66_w2	86/18/892	12_66	2018-03-26	2018-05-16	Butamifos	mg/kg	0.015	p.0,015			1	Eurofins	SFBA0-7	5.37	54.678734	18.342915	54.678813	18.346460	54.676754	18.348094	54.677199	18.343460
Stanisłw Selke	7	12	12_66_w2	86/18/892	12_66	2018-03-26	2018-05-16	Butralin	mg/kg	0.03	p.0,03			1	Eurofins	SFBA0-7	5.37	54.678734	18.342915	54.678813	18.346460	54.676754	18.348094	54.677199	18.343460
Stanisłw Selke	7	12	12_66_w2	86/18/892	12_66	2018-03-26	2018-05-16	Kadusafos	mg/kg	0.03	p.0,03			1	Eurofins	SFBA0-7	5.37	54.678734	18.342915	54.678813	18.346460	54.676754	18.348094	54.677199	18.343460
Stanisłw Selke	7	12	12_66_w2	86/18/892	12_66	2018-03-26	2018-05-16	Kaptafol	mg/kg	0.03	p.0,03			1	Eurofins	SFBA0-7	5.37	54.678734	18.342915	54.678813	18.346460	54.676754	18.348094	54.677199	18.343460
Stanisłw Selke	7	12	12_66_w2	86/18/892	12_66	2018-03-26	2018-05-16	Kaptan	mg/kg	0.03	p.0,03			1	Eurofins	SFBA0-7	5.37	54.678734	18.342915	54.678813	18.346460	54.676754	18.348094	54.677199	18.343460
Stanisłw Selke	7	12	12_66_w2	86/18/892	12_66	2018-03-26	2018-05-16	Karbofenotion	mg/kg	0.015	p.0,015			1	Eurofins	SFBA0-7	5.37	54.678734	18.342915	54.678813	18.346460	54.676754	18.348094	54.677199	18.343460
Stanisłw Selke	7	12	12_66_w2	86/18/892	12_66	2018-03-26	2018-05-16	Carbophenothion-methyl	mg/kg	0.03	p.0,03			1	Eurofins	SFBA0-7	5.37	54.678734	18.342915	54.678813	18.346460	54.676754	18.348094	54.677199	18.343460
Stanisłw Selke	7	12	12_66_w2	86/18/892	12_66	2018-03-26	2018-05-16	Carfentrazone-ethyl	mg/kg	0.03	p.0,03			1	Eurofins	SFBA0-7	5.37	54.678734	18.342915	54.678813	18.346460	54.676754	18.348094	54.677199	18.343460
Stanisłw Selke	7	12	12_66_w2	86/18/892	12_66	2018-03-26	2018-05-16	Chinometionat	mg/kg	0.015	p.0,015			1	Eurofins	SFBA0-7	5.37	54.678734	18.342915	54.678813	18.346460	54.676754	18.348094	54.677199	18.343460
Stanisłw Selke	7	12	12_66_w2	86/18/892	12_66	2018-03-26	2018-05-16	Chlorbenzyd	mg/kg	0.015	p.0,015			1	Eurofins	SFBA0-7	5.37	54.678734	18.342915	54.678813	18.346460	54.676754	18.348094	54.677199	18.343460
Stanisłw Selke	7	12	12_66_w2	86/18/892	12_66	2018-03-26	2018-05-16	Chlordane (total)	mg/kg	0.03	p.0,03			1	Eurofins	SFBA0-7	5.37	54.678734	18.342915	54.678813	18.346460	54.676754	18.348094	54.677199	18.343460
Stanisłw Selke	7	12	12_66_w2	86/18/892	12_66	2018-03-26	2018-05-16	Chlordan,cis-	mg/kg	0.015	p.0,015			1	Eurofins	SFBA0-7	5.37	54.678734	18.342915	54.678813	18.346460	54.676754	18.348094	54.677199	18.343460
Stanisłw Selke	7	12	12_66_w2	86/18/892	12_66	2018-03-26	2018-05-16	Chlordan,oxy-	mg/kg	0.03	p.0,03			1	Eurofins	SFBA0-7	5.37	54.678734	18.342915	54.678813	18.346460	54.676754	18.348094	54.677199	18.343460
Stanisłw Selke	7	12	12_66_w2	86/18/892	12_66	2018-03-26	2018-05-16	Chlordan,gamma/trans-	mg/kg	0.015	p.0,015			1	Eurofins	SFBA0-7	5.37	54.678734	18.342915	54.678813	18.346460	54.676754	18.348094	54.677199	18.343460
Stanisłw Selke	7	12	12_66_w2	86/18/892	12_66	2018-03-26	2018-05-16	Chlordecon	mg/kg	0.03	p.0,03			1	Eurofins	SFBA0-7	5.37	54.678734	18.342915	54.678813	18.346460	54.676754	18.348094	54.677199	18.343460
Stanisłw Selke	7	12	12_66_w2	86/18/892	12_66	2018-03-26	2018-05-16	Chlorethoksyfos	mg/kg	0.015	p.0,015			1	Eurofins	SFBA0-7	5.37	54.678734	18.342915	54.678813	18.346460	54.676754	18.348094	54.677199	18.343460
Stanisłw Selke	7	12	12_66_w2	86/18/892	12_66	2018-03-26	2018-05-16	Chlorfenapyr	mg/kg	0.015	p.0,015			1	Eurofins	SFBA0-7	5.37	54.678734	18.342915	54.678813	18.346460	54.676754	18.348094	54.677199	18.343460
Stanisłw Selke	7	12	12_66_w2	86/18/892	12_66	2018-03-26	2018-05-16	Chlorfenprop-methyl	mg/kg	0.03	p.0,03			1	Eurofins	SFBA0-7	5.37	54.678734	18.342915	54.678813	18.346460	54.676754	18.348094	54.677199	18.343460
Stanisłw Selke	7	12	12_66_w2	86/18/892	12_66	2018-03-26	2018-05-16	Chlorfenson	mg/kg	0.015	p.0,015			1	Eurofins	SFBA0-7	5.37	54.678734	18.342915	54.678813	18.346460	54.676754	18.348094	54.677199	18.343460
Stanisłw Selke	7	12	12_66_w2	86/18/892	12_66	2018-03-26	2018-05-16	Chlorfenwinfos	mg/kg	0.03	p.0,03			1	Eurofins	SFBA0-7	5.37	54.678734	18.342915	54.678813	18.346460	54.676754	18.348094	54.677199	18.343460
Stanisłw Selke	7	12	12_66_w2	86/18/892	12_66	2018-03-26	2018-05-16	Chloridazon	mg/kg	0.03	p.0,03			1	Eurofins	SFBA0-7	5.37	54.678734	18.342915	54.678813	18.346460	54.676754	18.348094	54.677199	18.343460
Stanisłw Selke	7	12	12_66_w2	86/18/892	12_66	2018-03-26	2018-05-16	Chlormephos	mg/kg	0.015	p.0,015			1	Eurofins	SFBA0-7	5.37	54.678734	18.342915	54.678813	18.346460	54.676754	18.348094	54.677199	18.343460
Stanisłw Selke	7	12	12_66_w2	86/18/892	12_66	2018-03-26	2018-05-16	Chlorobenzylat	mg/kg	0.015	p.0,015			1	Eurofins	SFBA0-7	5.37	54.678734	18.342915	54.678813	18.346460	54.676754	18.348094	54.677199	18.343460
Stanisłw Selke	7	12	12_66_w2	86/18/892	12_66	2018-03-26	2018-05-16	Chloroneb	mg/kg	0.03	p.0,03			1	Eurofins	SFBA0-7	5.37	54.678734	18.342915	54.678813	18.346460	54.676754	18.348094	54.677199	18.343460
Stanisłw Selke	7	12	12_66_w2	86/18/892	12_66	2018-03-26	2018-05-16	Chloropropylat	mg/kg	0.015	p.0,015			1	Eurofins	SFBA0-7	5.37	54.678734	18.342915	54.678813	18.346460	54.676754	18.348094	54.677199	18.343460
Stanisłw Selke	7	12	12_66_w2	86/18/892	12_66	2018-03-26	2018-05-16	Chlorotalonil	mg/kg	0.015	p.0,015			1	Eurofins	SFBA0-7	5.37	54.678734	18.342915	54.678813	18.346460	54.676754	18.348094	54.677199	18.343460
Stanisłw Selke	7	12	12_66_w2	86/18/892	12_66	2018-03-26	2018-05-16	Chlorpiryfos etylowy	mg/kg	0.015	p.0,015			1	Eurofins	SFBA0-7	5.37	54.678734	18.342915	54.678813	18.346460	54.676754	18.348094	54.677199	18.343460
Stanisłw Selke	7	12	12_66_w2	86/18/892	12_66	2018-03-26	2018-05-16	Chlorpiryfos metylowy	mg/kg	0.015	p.0,015			1	Eurofins	SFBA0-7	5.37	54.678734	18.342915	54.678813	18.346460	54.676754	18.348094	54.677199	18.343460
Stanisłw Selke	7	12	12_66_w2	86/18/892	12_66	2018-03-26	2018-05-16	Chlorthal-dimethyl	mg/kg	0.015	p.0,015			1	Eurofins	SFBA0-7	5.37	54.678734	18.342915	54.678813	18.346460	54.676754	18.348094	54.677199	18.343460
Stanisłw Selke	7	12	12_66_w2	86/18/892	12_66	2018-03-26	2018-05-16	Chlorotion	mg/kg	0.03	p.0,03			1	Eurofins	SFBA0-7	5.37	54.678734	18.342915	54.678813	18.346460	54.676754	18.348094	54.677199	18.343460
Stanisłw Selke	7	12	12_66_w2	86/18/892	12_66	2018-03-26	2018-05-16	Chlortiofos	mg/kg	0.015	p.0,015			1	Eurofins	SFBA0-7	5.37	54.678734	18.342915	54.678813	18.346460	54.676754	18.348094	54.677199	18.343460
Stanisłw Selke	7	12	12_66_w2	86/18/892	12_66	2018-03-26	2018-05-16	Chlozolinate	mg/kg	0.03	p.0,03			1	Eurofins	SFBA0-7	5.37	54.678734	18.342915	54.678813	18.346460	54.676754	18.348094	54.677199	18.343460
Stanisłw Selke	7	12	12_66_w2	86/18/892	12_66	2018-03-26	2018-05-16	Cinidon-ethyl	mg/kg	0.03	p.0,03			1	Eurofins	SFBA0-7	5.37	54.678734	18.342915	54.678813	18.346460	54.676754	18.348094	54.677199	18.343460
Stanisłw Selke	7	12	12_66_w2	86/18/892	12_66	2018-03-26	2018-05-16	Clodinafop-propargyl	mg/kg	0.09	p.0,09			1	Eurofins	SFBA0-7	5.37	54.678734	18.342915	54.678813	18.346460	54.676754	18.348094	54.677199	18.343460
Stanisłw Selke	7	12	12_66_w2	86/18/892	12_66	2018-03-26	2018-05-16	Kumafos	mg/kg	0.015	p.0,015			1	Eurofins	SFBA0-7	5.37	54.678734	18.342915	54.678813	18.346460	54.676754	18.348094	54.677199	18.343460
Stanisłw Selke	7	12	12_66_w2	86/18/892	12_66	2018-03-26	2018-05-16	Crotoxyphos	mg/kg	0.03	p.0,03			1	Eurofins	SFBA0-7	5.37	54.678734	18.342915	54.678813	18.346460	54.676754	18.348094	54.677199	18.343460
Stanisłw Selke	7	12	12_66_w2	86/18/892	12_66	2018-03-26	2018-05-16	Cyjanofenfos	mg/kg	0.03	p.0,03			1	Eurofins	SFBA0-7	5.37	54.678734	18.342915	54.678813	18.346460	54.676754	18.348094	54.677199	18.343460
Stanisłw Selke	7	12	12_66_w2	86/18/892	12_66	2018-03-26	2018-05-16	Cyanophos	mg/kg	0.03	p.0,03			1	Eurofins	SFBA0-7	5.37	54.678734	18.342915	54.678813	18.346460	54.676754	18.348094	54.677199	18.343460
Stanisłw Selke	7	12	12_66_w2	86/18/892	12_66	2018-03-26	2018-05-16	Cyflutryna	mg/kg	0.03	p.0,03			1	Eurofins	SFBA0-7	5.37	54.678734	18.342915	54.678813	18.346460	54.676754	18.348094	54.677199	18.343460
Stanisłw Selke	7	12	12_66_w2	86/18/892	12_66	2018-03-26	2018-05-16	lambda-Cyhalotryna	mg/kg	0.03	p.0,03			1	Eurofins	SFBA0-7	5.37	54.678734	18.342915	54.678813	18.346460	54.676754	18.348094	54.677199	18.343460
Stanisłw Selke	7	12	12_66_w2	86/18/892	12_66	2018-03-26	2018-05-16	Cypermetryna	mg/kg	0.015	p.0,015			1	Eurofins	SFBA0-7	5.37	54.678734	18.342915	54.678813	18.346460	54.676754	18.348094	54.677199	18.343460
Stanisłw Selke	7	12	12_66_w2	86/18/892	12_66	2018-03-26	2018-05-16	Cyphenothrin	mg/kg	0.03	p.0,03			1	Eurofins	SFBA0-7	5.37	54.678734	18.342915	54.678813	18.346460	54.676754	18.348094	54.677199	18.343460
Stanisłw Selke	7	12	12_66_w2	86/18/892	12_66	2018-03-26	2018-05-16	Cyprokonazol	mg/kg	0.12	p.0,12			1	Eurofins	SFBA0-7	5.37	54.678734	18.342915	54.678813	18.346460	54.676754	18.348094	54.677199	18.343460
Stanisłw Selke	7	12	12_66_w2	86/18/892	12_66	2018-03-26	2018-05-16	DDD-o,p	mg/kg	0.015	p.0,015			1	Eurofins	SFBA0-7	5.37	54.678734	18.342915	54.678813	18.346460	54.676754	18.348094	54.677199	18.343460
Stanisłw Selke	7	12	12_66_w2	86/18/892	12_66	2018-03-26	2018-05-16	DDE-o,p	mg/kg	0.015	p.0,015			1	Eurofins	SFBA0-7	5.37	54.678734	18.342915	54.678813	18.346460	54.676754	18.348094	54.677199	18.343460
Stanisłw Selke	7	12	12_66_w2	86/18/892	12_66	2018-03-26	2018-05-16	DDT(p,p'-DDT+o,p'-DDT+p.p'-DDE+p,p'-TDE)	mg/kg	0.015	p.0,015			1	Eurofins	SFBA0-7	5.37	54.678734	18.342915	54.678813	18.346460	54.676754	18.348094	54.677199	18.343460
Stanisłw Selke	7	12	12_66_w2	86/18/892	12_66	2018-03-26	2018-05-16	Deltametryna	mg/kg	0.015	p.0,015			1	Eurofins	SFBA0-7	5.37	54.678734	18.342915	54.678813	18.346460	54.676754	18.348094	54.677199	18.343460
Stanisłw Selke	7	12	12_66_w2	86/18/892	12_66	2018-03-26	2018-05-16	Dialifos	mg/kg	0.03	p.0,03			1	Eurofins	SFBA0-7	5.37	54.678734	18.342915	54.678813	18.346460	54.676754	18.348094	54.677199	18.343460
Stanisłw Selke	7	12	12_66_w2	86/18/892	12_66	2018-03-26	2018-05-16	Di-allate	mg/kg	0.03	p.0,03			1	Eurofins	SFBA0-7	5.37	54.678734	18.342915	54.678813	18.346460	54.676754	18.348094	54.677199	18.343460
Stanisłw Selke	7	12	12_66_w2	86/18/892	12_66	2018-03-26	2018-05-16	Diazynon	mg/kg	0.03	p.0,03			1	Eurofins	SFBA0-7	5.37	54.678734	18.342915	54.678813	18.346460	54.676754	18.348094	54.677199	18.343460
Stanisłw Selke	7	12	12_66_w2	86/18/892	12_66	2018-03-26	2018-05-16	4,4-Dibromobenzophenone	mg/kg	0.03	p.0,03			1	Eurofins	SFBA0-7	5.37	54.678734	18.342915	54.678813	18.346460	54.676754	18.348094	54.677199	18.343460
Stanisłw Selke	7	12	12_66_w2	86/18/892	12_66	2018-03-26	2018-05-16	Dicapthon	mg/kg	0.03	p.0,03			1	Eurofins	SFBA0-7	5.37	54.678734	18.342915	54.678813	18.346460	54.676754	18.348094	54.677199	18.343460
Stanisłw Selke	7	12	12_66_w2	86/18/892	12_66	2018-03-26	2018-05-16	Dichlobenil	mg/kg	0.15	p.0,15			1	Eurofins	SFBA0-7	5.37	54.678734	18.342915	54.678813	18.346460	54.676754	18.348094	54.677199	18.343460
Stanisłw Selke	7	12	12_66_w2	86/18/892	12_66	2018-03-26	2018-05-16	Dichlofention	mg/kg	0.03	p.0,03			1	Eurofins	SFBA0-7	5.37	54.678734	18.342915	54.678813	18.346460	54.676754	18.348094	54.677199	18.343460
Stanisłw Selke	7	12	12_66_w2	86/18/892	12_66	2018-03-26	2018-05-16	Dichlofluanid	mg/kg	0.015	p.0,015			1	Eurofins	SFBA0-7	5.37	54.678734	18.342915	54.678813	18.346460	54.676754	18.348094	54.677199	18.343460
Stanisłw Selke	7	12	12_66_w2	86/18/892	12_66	2018-03-26	2018-05-16	Dichloran	mg/kg	0.075	p.0,075			1	Eurofins	SFBA0-7	5.37	54.678734	18.342915	54.678813	18.346460	54.676754	18.348094	54.677199	18.343460
Stanisłw Selke	7	12	12_66_w2	86/18/892	12_66	2018-03-26	2018-05-16	Dichlorfos	mg/kg	0.06	p.0,06			1	Eurofins	SFBA0-7	5.37	54.678734	18.342915	54.678813	18.346460	54.676754	18.348094	54.677199	18.343460
Stanisłw Selke	7	12	12_66_w2	86/18/892	12_66	2018-03-26	2018-05-16	Diclofop-methyl	mg/kg	0.015	p.0,015			1	Eurofins	SFBA0-7	5.37	54.678734	18.342915	54.678813	18.346460	54.676754	18.348094	54.677199	18.343460
Stanisłw Selke	7	12	12_66_w2	86/18/892	12_66	2018-03-26	2018-05-16	Dikofol (suma)	mg/kg	0.015	p.0,015			1	Eurofins	SFBA0-7	5.37	54.678734	18.342915	54.678813	18.346460	54.676754	18.348094	54.677199	18.343460
Stanisłw Selke	7	12	12_66_w2	86/18/892	12_66	2018-03-26	2018-05-16	Dicofol,o,p-	mg/kg	0.015	p.0,015			1	Eurofins	SFBA0-7	5.37	54.678734	18.342915	54.678813	18.346460	54.676754	18.348094	54.677199	18.343460
Stanisłw Selke	7	12	12_66_w2	86/18/892	12_66	2018-03-26	2018-05-16	Dicofol,p,p--	mg/kg	0.015	p.0,015			1	Eurofins	SFBA0-7	5.37	54.678734	18.342915	54.678813	18.346460	54.676754	18.348094	54.677199	18.343460
Stanisłw Selke	7	12	12_66_w2	86/18/892	12_66	2018-03-26	2018-05-16	Dicrotophos	mg/kg	0.03	p.0,03			1	Eurofins	SFBA0-7	5.37	54.678734	18.342915	54.678813	18.346460	54.676754	18.348094	54.677199	18.343460
Stanisłw Selke	7	12	12_66_w2	86/18/892	12_66	2018-03-26	2018-05-16	Dieldryna	mg/kg	0.015	p.0,015			1	Eurofins	SFBA0-7	5.37	54.678734	18.342915	54.678813	18.346460	54.676754	18.348094	54.677199	18.343460
Stanisłw Selke	7	12	12_66_w2	86/18/892	12_66	2018-03-26	2018-05-16	Dienochlor	mg/kg	0.03	p.0,03			1	Eurofins	SFBA0-7	5.37	54.678734	18.342915	54.678813	18.346460	54.676754	18.348094	54.677199	18.343460
Stanisłw Selke	7	12	12_66_w2	86/18/892	12_66	2018-03-26	2018-05-16	Difenokonazol	mg/kg	0.045	p.0,045			1	Eurofins	SFBA0-7	5.37	54.678734	18.342915	54.678813	18.346460	54.676754	18.348094	54.677199	18.343460
Stanisłw Selke	7	12	12_66_w2	86/18/892	12_66	2018-03-26	2018-05-16	Diflufenican	mg/kg	0.03	p.0,03			1	Eurofins	SFBA0-7	5.37	54.678734	18.342915	54.678813	18.346460	54.676754	18.348094	54.677199	18.343460
Stanisłw Selke	7	12	12_66_w2	86/18/892	12_66	2018-03-26	2018-05-16	Dimefox	mg/kg	0.15	p.0,15			1	Eurofins	SFBA0-7	5.37	54.678734	18.342915	54.678813	18.346460	54.676754	18.348094	54.677199	18.343460
Stanisłw Selke	7	12	12_66_w2	86/18/892	12_66	2018-03-26	2018-05-16	Dimetrachlor	mg/kg	0.03	p.0,03			1	Eurofins	SFBA0-7	5.37	54.678734	18.342915	54.678813	18.346460	54.676754	18.348094	54.677199	18.343460
Stanisłw Selke	7	12	12_66_w2	86/18/892	12_66	2018-03-26	2018-05-16	Dimethipine	mg/kg	0.03	p.0,03			1	Eurofins	SFBA0-7	5.37	54.678734	18.342915	54.678813	18.346460	54.676754	18.348094	54.677199	18.343460
Stanisłw Selke	7	12	12_66_w2	86/18/892	12_66	2018-03-26	2018-05-16	Dimetoat	mg/kg	0.06	p.0,06			1	Eurofins	SFBA0-7	5.37	54.678734	18.342915	54.678813	18.346460	54.676754	18.348094	54.677199	18.343460
Stanisłw Selke	7	12	12_66_w2	86/18/892	12_66	2018-03-26	2018-05-16	Dimetomorf	mg/kg	0.03	p.0,03			1	Eurofins	SFBA0-7	5.37	54.678734	18.342915	54.678813	18.346460	54.676754	18.348094	54.677199	18.343460
Stanisłw Selke	7	12	12_66_w2	86/18/892	12_66	2018-03-26	2018-05-16	Dinikonazol	mg/kg	0.03	p.0,03			1	Eurofins	SFBA0-7	5.37	54.678734	18.342915	54.678813	18.346460	54.676754	18.348094	54.677199	18.343460
Stanisłw Selke	7	12	12_66_w2	86/18/892	12_66	2018-03-26	2018-05-16	Dinitramine	mg/kg	0.03	p.0,03			1	Eurofins	SFBA0-7	5.37	54.678734	18.342915	54.678813	18.346460	54.676754	18.348094	54.677199	18.343460
Stanisłw Selke	7	12	12_66_w2	86/18/892	12_66	2018-03-26	2018-05-16	Dinobuton	mg/kg	0.1	p.0,1			1	Eurofins	SFBA0-7	5.37	54.678734	18.342915	54.678813	18.346460	54.676754	18.348094	54.677199	18.343460
Stanisłw Selke	7	12	12_66_w2	86/18/892	12_66	2018-03-26	2018-05-16	Disulfoton	mg/kg	0.03	p.0,03			1	Eurofins	SFBA0-7	5.37	54.678734	18.342915	54.678813	18.346460	54.676754	18.348094	54.677199	18.343460
Stanisłw Selke	7	12	12_66_w2	86/18/892	12_66	2018-03-26	2018-05-16	Disulfoton-sulfon	mg/kg	0.03	p.0,03			1	Eurofins	SFBA0-7	5.37	54.678734	18.342915	54.678813	18.346460	54.676754	18.348094	54.677199	18.343460
Stanisłw Selke	7	12	12_66_w2	86/18/892	12_66	2018-03-26	2018-05-16	Ditalimfos	mg/kg	0.015	p.0,015			1	Eurofins	SFBA0-7	5.37	54.678734	18.342915	54.678813	18.346460	54.676754	18.348094	54.677199	18.343460
Stanisłw Selke	7	12	12_66_w2	86/18/892	12_66	2018-03-26	2018-05-16	Edifenphos	mg/kg	0.03	p.0,03			1	Eurofins	SFBA0-7	5.37	54.678734	18.342915	54.678813	18.346460	54.676754	18.348094	54.677199	18.343460
Stanisłw Selke	7	12	12_66_w2	86/18/892	12_66	2018-03-26	2018-05-16	Endosulfan (suma izomerów)	mg/kg	0.015	p.0,015			1	Eurofins	SFBA0-7	5.37	54.678734	18.342915	54.678813	18.346460	54.676754	18.348094	54.677199	18.343460
Stanisłw Selke	7	12	12_66_w2	86/18/892	12_66	2018-03-26	2018-05-16	alfa-Endosulfan	mg/kg	0.015	p.0,015			1	Eurofins	SFBA0-7	5.37	54.678734	18.342915	54.678813	18.346460	54.676754	18.348094	54.677199	18.343460
Stanisłw Selke	7	12	12_66_w2	86/18/892	12_66	2018-03-26	2018-05-16	Siarczan endosulfanu	mg/kg	0.015	p.0,015			1	Eurofins	SFBA0-7	5.37	54.678734	18.342915	54.678813	18.346460	54.676754	18.348094	54.677199	18.343460
Stanisłw Selke	7	12	12_66_w2	86/18/892	12_66	2018-03-26	2018-05-16	beta-Endosulfan	mg/kg	0.015	p.0,015			1	Eurofins	SFBA0-7	5.37	54.678734	18.342915	54.678813	18.346460	54.676754	18.348094	54.677199	18.343460
Stanisłw Selke	7	12	12_66_w2	86/18/892	12_66	2018-03-26	2018-05-16	Endryna	mg/kg	0.015	p.0,015			1	Eurofins	SFBA0-7	5.37	54.678734	18.342915	54.678813	18.346460	54.676754	18.348094	54.677199	18.343460
Stanisłw Selke	7	12	12_66_w2	86/18/892	12_66	2018-03-26	2018-05-16	Ketoendrin-delta	mg/kg	0.015	p.0,015			1	Eurofins	SFBA0-7	5.37	54.678734	18.342915	54.678813	18.346460	54.676754	18.348094	54.677199	18.343460
Stanisłw Selke	7	12	12_66_w2	86/18/892	12_66	2018-03-26	2018-05-16	EPN	mg/kg	0.03	p.0,03			1	Eurofins	SFBA0-7	5.37	54.678734	18.342915	54.678813	18.346460	54.676754	18.348094	54.677199	18.343460
Stanisłw Selke	7	12	12_66_w2	86/18/892	12_66	2018-03-26	2018-05-16	Epoksykonazol	mg/kg	0.12	p.0,12			1	Eurofins	SFBA0-7	5.37	54.678734	18.342915	54.678813	18.346460	54.676754	18.348094	54.677199	18.343460
Stanisłw Selke	7	12	12_66_w2	86/18/892	12_66	2018-03-26	2018-05-16	Etaconazole	mg/kg	0.06	p.0,06			1	Eurofins	SFBA0-7	5.37	54.678734	18.342915	54.678813	18.346460	54.676754	18.348094	54.677199	18.343460
Stanisłw Selke	7	12	12_66_w2	86/18/892	12_66	2018-03-26	2018-05-16	Ethalfluralin	mg/kg	0.03	p.0,03			1	Eurofins	SFBA0-7	5.37	54.678734	18.342915	54.678813	18.346460	54.676754	18.348094	54.677199	18.343460
Stanisłw Selke	7	12	12_66_w2	86/18/892	12_66	2018-03-26	2018-05-16	Etion	mg/kg	0.015	p.0,015			1	Eurofins	SFBA0-7	5.37	54.678734	18.342915	54.678813	18.346460	54.676754	18.348094	54.677199	18.343460
Stanisłw Selke	7	12	12_66_w2	86/18/892	12_66	2018-03-26	2018-05-16	Ethiprol	mg/kg	0.06	p.0,06			1	Eurofins	SFBA0-7	5.37	54.678734	18.342915	54.678813	18.346460	54.676754	18.348094	54.677199	18.343460
Stanisłw Selke	7	12	12_66_w2	86/18/892	12_66	2018-03-26	2018-05-16	Etofumesat	mg/kg	0.15	p.0,15			1	Eurofins	SFBA0-7	5.37	54.678734	18.342915	54.678813	18.346460	54.676754	18.348094	54.677199	18.343460
Stanisłw Selke	7	12	12_66_w2	86/18/892	12_66	2018-03-26	2018-05-16	Etoprofos	mg/kg	0.015	p.0,15			1	Eurofins	SFBA0-7	5.37	54.678734	18.342915	54.678813	18.346460	54.676754	18.348094	54.677199	18.343460
Stanisłw Selke	7	12	12_66_w2	86/18/892	12_66	2018-03-26	2018-05-16	Etridiazole	mg/kg	0.015	p.0,15			1	Eurofins	SFBA0-7	5.37	54.678734	18.342915	54.678813	18.346460	54.676754	18.348094	54.677199	18.343460
Stanisłw Selke	7	12	12_66_w2	86/18/892	12_66	2018-03-26	2018-05-16	Etrimfos	mg/kg	0.015	p.0,15			1	Eurofins	SFBA0-7	5.37	54.678734	18.342915	54.678813	18.346460	54.676754	18.348094	54.677199	18.343460
Stanisłw Selke	7	12	12_66_w2	86/18/892	12_66	2018-03-26	2018-05-16	Famophos	mg/kg	0.03	p.0,03			1	Eurofins	SFBA0-7	5.37	54.678734	18.342915	54.678813	18.346460	54.676754	18.348094	54.677199	18.343460
Stanisłw Selke	7	12	12_66_w2	86/18/892	12_66	2018-03-26	2018-05-16	Famoksadon	mg/kg	0.03	p.0,03			1	Eurofins	SFBA0-7	5.37	54.678734	18.342915	54.678813	18.346460	54.676754	18.348094	54.677199	18.343460
Stanisłw Selke	7	12	12_66_w2	86/18/892	12_66	2018-03-26	2018-05-16	Fenamidon	mg/kg	0.06	p.0,06			1	Eurofins	SFBA0-7	5.37	54.678734	18.342915	54.678813	18.346460	54.676754	18.348094	54.677199	18.343460
Stanisłw Selke	7	12	12_66_w2	86/18/892	12_66	2018-03-26	2018-05-16	Fenamifos (suma izomerów)	mg/kg	0.06	p.0,06			1	Eurofins	SFBA0-7	5.37	54.678734	18.342915	54.678813	18.346460	54.676754	18.348094	54.677199	18.343460
Stanisłw Selke	7	12	12_66_w2	86/18/892	12_66	2018-03-26	2018-05-16	Fenarimol	mg/kg	0.15	p.0,15			1	Eurofins	SFBA0-7	5.37	54.678734	18.342915	54.678813	18.346460	54.676754	18.348094	54.677199	18.343460
Stanisłw Selke	7	12	12_66_w2	86/18/892	12_66	2018-03-26	2018-05-16	Fenbukonazol	mg/kg	0.03	p.0,03			1	Eurofins	SFBA0-7	5.37	54.678734	18.342915	54.678813	18.346460	54.676754	18.348094	54.677199	18.343460
Stanisłw Selke	7	12	12_66_w2	86/18/892	12_66	2018-03-26	2018-05-16	Fenchlorazole	mg/kg	0.03	p.0,03			1	Eurofins	SFBA0-7	5.37	54.678734	18.342915	54.678813	18.346460	54.676754	18.348094	54.677199	18.343460
Stanisłw Selke	7	12	12_66_w2	86/18/892	12_66	2018-03-26	2018-05-16	Fenchlorofos	mg/kg	0.015	p.0,015			1	Eurofins	SFBA0-7	5.37	54.678734	18.342915	54.678813	18.346460	54.676754	18.348094	54.677199	18.343460
Stanisłw Selke	7	12	12_66_w2	86/18/892	12_66	2018-03-26	2018-05-16	Fenfluthrine	mg/kg	0.03	p.0,03			1	Eurofins	SFBA0-7	5.37	54.678734	18.342915	54.678813	18.346460	54.676754	18.348094	54.677199	18.343460
Stanisłw Selke	7	12	12_66_w2	86/18/892	12_66	2018-03-26	2018-05-16	Fenheksamid	mg/kg	0.15	p.0,15			1	Eurofins	SFBA0-7	5.37	54.678734	18.342915	54.678813	18.346460	54.676754	18.348094	54.677199	18.343460
Stanisłw Selke	7	12	12_66_w2	86/18/892	12_66	2018-03-26	2018-05-16	Fenitrotion	mg/kg	0.015	p.0,015			1	Eurofins	SFBA0-7	5.37	54.678734	18.342915	54.678813	18.346460	54.676754	18.348094	54.677199	18.343460
Stanisłw Selke	7	12	12_66_w2	86/18/892	12_66	2018-03-26	2018-05-16	Fenoxaprop-ethyl	mg/kg	0.15	p.0,15			1	Eurofins	SFBA0-7	5.37	54.678734	18.342915	54.678813	18.346460	54.676754	18.348094	54.677199	18.343460
Stanisłw Selke	7	12	12_66_w2	86/18/892	12_66	2018-03-26	2018-05-16	Fenpiclonil	mg/kg	0.15	p.0,15			1	Eurofins	SFBA0-7	5.37	54.678734	18.342915	54.678813	18.346460	54.676754	18.348094	54.677199	18.343460
Stanisłw Selke	7	12	12_66_w2	86/18/892	12_66	2018-03-26	2018-05-16	Fenpropatryna	mg/kg	0.015	p.0,015			1	Eurofins	SFBA0-7	5.37	54.678734	18.342915	54.678813	18.346460	54.676754	18.348094	54.677199	18.343460
Stanisłw Selke	7	12	12_66_w2	86/18/892	12_66	2018-03-26	2018-05-16	Fenpropimorf	mg/kg	0.15	p.0,15			1	Eurofins	SFBA0-7	5.37	54.678734	18.342915	54.678813	18.346460	54.676754	18.348094	54.677199	18.343460
Stanisłw Selke	7	12	12_66_w2	86/18/892	12_66	2018-03-26	2018-05-16	Fenson	mg/kg	0.03	p.0,03			1	Eurofins	SFBA0-7	5.37	54.678734	18.342915	54.678813	18.346460	54.676754	18.348094	54.677199	18.343460
Stanisłw Selke	7	12	12_66_w2	86/18/892	12_66	2018-03-26	2018-05-16	Fensulfotion	mg/kg	0.03	p.0,03			1	Eurofins	SFBA0-7	5.37	54.678734	18.342915	54.678813	18.346460	54.676754	18.348094	54.677199	18.343460
Stanisłw Selke	7	12	12_66_w2	86/18/892	12_66	2018-03-26	2018-05-16	Fewalerat (suma izomer ów)	mg/kg	0.015	p.0,015			1	Eurofins	SFBA0-7	5.37	54.678734	18.342915	54.678813	18.346460	54.676754	18.348094	54.677199	18.343460
Stanisłw Selke	7	12	12_66_w2	86/18/892	12_66	2018-03-26	2018-05-16	Fenwalerat	mg/kg	0.015	p.0,015			1	Eurofins	SFBA0-7	5.37	54.678734	18.342915	54.678813	18.346460	54.676754	18.348094	54.677199	18.343460
Stanisłw Selke	7	12	12_66_w2	86/18/892	12_66	2018-03-26	2018-05-16	Fenvalerate(RS-/SR-Izomer)	mg/kg	0.015	p.0,015			1	Eurofins	SFBA0-7	5.37	54.678734	18.342915	54.678813	18.346460	54.676754	18.348094	54.677199	18.343460
Stanisłw Selke	7	12	12_66_w2	86/18/892	12_66	2018-03-26	2018-05-16	Fipronil	mg/kg	0.012	p.0,012			1	Eurofins	SFBA0-7	5.37	54.678734	18.342915	54.678813	18.346460	54.676754	18.348094	54.677199	18.343460
Stanisłw Selke	7	12	12_66_w2	86/18/892	12_66	2018-03-26	2018-05-16	Fipronil,desulfinyl-	mg/kg	0.012	p.0,012			1	Eurofins	SFBA0-7	5.37	54.678734	18.342915	54.678813	18.346460	54.676754	18.348094	54.677199	18.343460
Stanisłw Selke	7	12	12_66_w2	86/18/892	12_66	2018-03-26	2018-05-16	Fipranil+Sulfonmetab.MB46136(suma)	mg/kg	0.015	p.0,015			1	Eurofins	SFBA0-7	5.37	54.678734	18.342915	54.678813	18.346460	54.676754	18.348094	54.677199	18.343460
Stanisłw Selke	7	12	12_66_w2	86/18/892	12_66	2018-03-26	2018-05-16	Fipronil sulfid	mg/kg	0.015	p.0,015			1	Eurofins	SFBA0-7	5.37	54.678734	18.342915	54.678813	18.346460	54.676754	18.348094	54.677199	18.343460
Stanisłw Selke	7	12	12_66_w2	86/18/892	12_66	2018-03-26	2018-05-16	Fipronil sulfon	mg/kg	0.015	p.0,015			1	Eurofins	SFBA0-7	5.37	54.678734	18.342915	54.678813	18.346460	54.676754	18.348094	54.677199	18.343460
Stanisłw Selke	7	12	12_66_w2	86/18/892	12_66	2018-03-26	2018-05-16	Flamprop-isopropyl	mg/kg	0.03	p.0,03			1	Eurofins	SFBA0-7	5.37	54.678734	18.342915	54.678813	18.346460	54.676754	18.348094	54.677199	18.343460
Stanisłw Selke	7	12	12_66_w2	86/18/892	12_66	2018-03-26	2018-05-16	Flamprop-methyl	mg/kg	0.03	p.0,03			1	Eurofins	SFBA0-7	5.37	54.678734	18.342915	54.678813	18.346460	54.676754	18.348094	54.677199	18.343460
Stanisłw Selke	7	12	12_66_w2	86/18/892	12_66	2018-03-26	2018-05-16	Flonikamid	mg/kg	0.15	p.0,15			1	Eurofins	SFBA0-7	5.37	54.678734	18.342915	54.678813	18.346460	54.676754	18.348094	54.677199	18.343460
Stanisłw Selke	7	12	12_66_w2	86/18/892	12_66	2018-03-26	2018-05-16	Fluazifop-butyl	mg/kg	0.15	p.0,15			1	Eurofins	SFBA0-7	5.37	54.678734	18.342915	54.678813	18.346460	54.676754	18.348094	54.677199	18.343460
Stanisłw Selke	7	12	12_66_w2	86/18/892	12_66	2018-03-26	2018-05-16	Fluazinam	mg/kg	0.03	p.0,03			1	Eurofins	SFBA0-7	5.37	54.678734	18.342915	54.678813	18.346460	54.676754	18.348094	54.677199	18.343460
Stanisłw Selke	7	12	12_66_w2	86/18/892	12_66	2018-03-26	2018-05-16	Fluchloralina	mg/kg	0.015	p.0,015			1	Eurofins	SFBA0-7	5.37	54.678734	18.342915	54.678813	18.346460	54.676754	18.348094	54.677199	18.343460
Stanisłw Selke	7	12	12_66_w2	86/18/892	12_66	2018-03-26	2018-05-16	Flucytrynat	mg/kg	0.03	p.0,03			1	Eurofins	SFBA0-7	5.37	54.678734	18.342915	54.678813	18.346460	54.676754	18.348094	54.677199	18.343460
Stanisłw Selke	7	12	12_66_w2	86/18/892	12_66	2018-03-26	2018-05-16	Flufenoksuron	mg/kg	0.03	p.0,03			1	Eurofins	SFBA0-7	5.37	54.678734	18.342915	54.678813	18.346460	54.676754	18.348094	54.677199	18.343460
Stanisłw Selke	7	12	12_66_w2	86/18/892	12_66	2018-03-26	2018-05-16	Flumethrine	mg/kg	0.03	p.0,03			1	Eurofins	SFBA0-7	5.37	54.678734	18.342915	54.678813	18.346460	54.676754	18.348094	54.677199	18.343460
Stanisłw Selke	7	12	12_66_w2	86/18/892	12_66	2018-03-26	2018-05-16	Flumetralin	mg/kg	0.015	p.0,015			1	Eurofins	SFBA0-7	5.37	54.678734	18.342915	54.678813	18.346460	54.676754	18.348094	54.677199	18.343460
Stanisłw Selke	7	12	12_66_w2	86/18/892	12_66	2018-03-26	2018-05-16	Flupikolid	mg/kg	0.03	p.0,03			1	Eurofins	SFBA0-7	5.37	54.678734	18.342915	54.678813	18.346460	54.676754	18.348094	54.677199	18.343460
Stanisłw Selke	7	12	12_66_w2	86/18/892	12_66	2018-03-26	2018-05-16	Fluorodifen	mg/kg	0.015	p.0,015			1	Eurofins	SFBA0-7	5.37	54.678734	18.342915	54.678813	18.346460	54.676754	18.348094	54.677199	18.343460
Stanisłw Selke	7	12	12_66_w2	86/18/892	12_66	2018-03-26	2018-05-16	Fluotrimazole	mg/kg	0.1	p.0,1			1	Eurofins	SFBA0-7	5.37	54.678734	18.342915	54.678813	18.346460	54.676754	18.348094	54.677199	18.343460
Stanisłw Selke	7	12	12_66_w2	86/18/892	12_66	2018-03-26	2018-05-16	Fluchinkonazol	mg/kg	0.03	p.0,03			1	Eurofins	SFBA0-7	5.37	54.678734	18.342915	54.678813	18.346460	54.676754	18.348094	54.677199	18.343460
Stanisłw Selke	7	12	12_66_w2	86/18/892	12_66	2018-03-26	2018-05-16	Flurenol-butyl	mg/kg	0.06	p.0,06			1	Eurofins	SFBA0-7	5.37	54.678734	18.342915	54.678813	18.346460	54.676754	18.348094	54.677199	18.343460
Stanisłw Selke	7	12	12_66_w2	86/18/892	12_66	2018-03-26	2018-05-16	Flurochloridon	mg/kg	0.03	p.0,03			1	Eurofins	SFBA0-7	5.37	54.678734	18.342915	54.678813	18.346460	54.676754	18.348094	54.677199	18.343460
Stanisłw Selke	7	12	12_66_w2	86/18/892	12_66	2018-03-26	2018-05-16	Flurtamone	mg/kg	0.03	p.0,03			1	Eurofins	SFBA0-7	5.37	54.678734	18.342915	54.678813	18.346460	54.676754	18.348094	54.677199	18.343460
Stanisłw Selke	7	12	12_66_w2	86/18/892	12_66	2018-03-26	2018-05-16	Flusilazol	mg/kg	0.075	p.0,075			1	Eurofins	SFBA0-7	5.37	54.678734	18.342915	54.678813	18.346460	54.676754	18.348094	54.677199	18.343460
Stanisłw Selke	7	12	12_66_w2	86/18/892	12_66	2018-03-26	2018-05-16	Folpet	mg/kg	0.03	p.0,03			1	Eurofins	SFBA0-7	5.37	54.678734	18.342915	54.678813	18.346460	54.676754	18.348094	54.677199	18.343460
Stanisłw Selke	7	12	12_66_w2	86/18/892	12_66	2018-03-26	2018-05-16	Fonofos	mg/kg	0.015	p.0,015			1	Eurofins	SFBA0-7	5.37	54.678734	18.342915	54.678813	18.346460	54.676754	18.348094	54.677199	18.343460
Stanisłw Selke	7	12	12_66_w2	86/18/892	12_66	2018-03-26	2018-05-16	Formotion	mg/kg	0.03	p.0,03			1	Eurofins	SFBA0-7	5.37	54.678734	18.342915	54.678813	18.346460	54.676754	18.348094	54.677199	18.343460
Stanisłw Selke	7	12	12_66_w2	86/18/892	12_66	2018-03-26	2018-05-16	Genite	mg/kg	0.03	p.0,03			1	Eurofins	SFBA0-7	5.37	54.678734	18.342915	54.678813	18.346460	54.676754	18.348094	54.677199	18.343460
Stanisłw Selke	7	12	12_66_w2	86/18/892	12_66	2018-03-26	2018-05-16	Halfenprox	mg/kg	0.03	p.0,03			1	Eurofins	SFBA0-7	5.37	54.678734	18.342915	54.678813	18.346460	54.676754	18.348094	54.677199	18.343460
Stanisłw Selke	7	12	12_66_w2	86/18/892	12_66	2018-03-26	2018-05-16	Haloxyfop-Ethoxyethyl	mg/kg	0.03	p.0,03			1	Eurofins	SFBA0-7	5.37	54.678734	18.342915	54.678813	18.346460	54.676754	18.348094	54.677199	18.343460
Stanisłw Selke	7	12	12_66_w2	86/18/892	12_66	2018-03-26	2018-05-16	Haloxyfop-methyl	mg/kg	0.15	p.0,15			1	Eurofins	SFBA0-7	5.37	54.678734	18.342915	54.678813	18.346460	54.676754	18.348094	54.677199	18.343460
Stanisłw Selke	7	12	12_66_w2	86/18/892	12_66	2018-03-26	2018-05-16	HCH (sumaizomerów-bez lindan)	mg/kg	0.015	p.0,015			1	Eurofins	SFBA0-7	5.37	54.678734	18.342915	54.678813	18.346460	54.676754	18.348094	54.677199	18.343460
Stanisłw Selke	7	12	12_66_w2	86/18/892	12_66	2018-03-26	2018-05-16	Alfa-HCH	mg/kg	0.015	p.0,015			1	Eurofins	SFBA0-7	5.37	54.678734	18.342915	54.678813	18.346460	54.676754	18.348094	54.677199	18.343460
Stanisłw Selke	7	12	12_66_w2	86/18/892	12_66	2018-03-26	2018-05-16	Beta-HCH	mg/kg	0.015	p.0,015			1	Eurofins	SFBA0-7	5.37	54.678734	18.342915	54.678813	18.346460	54.676754	18.348094	54.677199	18.343460
Stanisłw Selke	7	12	12_66_w2	86/18/892	12_66	2018-03-26	2018-05-16	Delta-HCH	mg/kg	0.015	p.0,015			1	Eurofins	SFBA0-7	5.37	54.678734	18.342915	54.678813	18.346460	54.676754	18.348094	54.677199	18.343460
Stanisłw Selke	7	12	12_66_w2	86/18/892	12_66	2018-03-26	2018-05-16	Epsilon-HCH	mg/kg	0.015	p.0,015			1	Eurofins	SFBA0-7	5.37	54.678734	18.342915	54.678813	18.346460	54.676754	18.348094	54.677199	18.343460
Stanisłw Selke	7	12	12_66_w2	86/18/892	12_66	2018-03-26	2018-05-16	Lindan(gamma-HCH)	mg/kg	0.015	p.0,015			1	Eurofins	SFBA0-7	5.37	54.678734	18.342915	54.678813	18.346460	54.676754	18.348094	54.677199	18.343460
Stanisłw Selke	7	12	12_66_w2	86/18/892	12_66	2018-03-26	2018-05-16	Heptachlor	mg/kg	0.015	p.0,015			1	Eurofins	SFBA0-7	5.37	54.678734	18.342915	54.678813	18.346460	54.676754	18.348094	54.677199	18.343460
Stanisłw Selke	7	12	12_66_w2	86/18/892	12_66	2018-03-26	2018-05-16	Heptachlor(suma)	mg/kg	0.015	p.0,015			1	Eurofins	SFBA0-7	5.37	54.678734	18.342915	54.678813	18.346460	54.676754	18.348094	54.677199	18.343460
Stanisłw Selke	7	12	12_66_w2	86/18/892	12_66	2018-03-26	2018-05-16	Heptahlor-trans-epoksyd	mg/kg	0.015	p.0,015			1	Eurofins	SFBA0-7	5.37	54.678734	18.342915	54.678813	18.346460	54.676754	18.348094	54.677199	18.343460
Stanisłw Selke	7	12	12_66_w2	86/18/892	12_66	2018-03-26	2018-05-16	Heptahlor-cis-epoksyd	mg/kg	0.015	p.0,015			1	Eurofins	SFBA0-7	5.37	54.678734	18.342915	54.678813	18.346460	54.676754	18.348094	54.677199	18.343460
Stanisłw Selke	7	12	12_66_w2	86/18/892	12_66	2018-03-26	2018-05-16	Heptenofos	mg/kg	0.03	p.0,03			1	Eurofins	SFBA0-7	5.37	54.678734	18.342915	54.678813	18.346460	54.676754	18.348094	54.677199	18.343460
Stanisłw Selke	7	12	12_66_w2	86/18/892	12_66	2018-03-26	2018-05-16	Heksachlorobenzen(HCB)	mg/kg	0.015	p.0,015			1	Eurofins	SFBA0-7	5.37	54.678734	18.342915	54.678813	18.346460	54.676754	18.348094	54.677199	18.343460
Stanisłw Selke	7	12	12_66_w2	86/18/892	12_66	2018-03-26	2018-05-16	Heksakonazol	mg/kg	0.045	p.0,045			1	Eurofins	SFBA0-7	5.37	54.678734	18.342915	54.678813	18.346460	54.676754	18.348094	54.677199	18.343460
Stanisłw Selke	7	12	12_66_w2	86/18/892	12_66	2018-03-26	2018-05-16	Indanofan	mg/kg	0.06	p.0,06			1	Eurofins	SFBA0-7	5.37	54.678734	18.342915	54.678813	18.346460	54.676754	18.348094	54.677199	18.343460
Stanisłw Selke	7	12	12_66_w2	86/18/892	12_66	2018-03-26	2018-05-16	Indoksakarb	mg/kg	0.015	p.0,015			1	Eurofins	SFBA0-7	5.37	54.678734	18.342915	54.678813	18.346460	54.676754	18.348094	54.677199	18.343460
Stanisłw Selke	7	12	12_66_w2	86/18/892	12_66	2018-03-26	2018-05-16	Jodofenfos	mg/kg	0.015	p.0,015			1	Eurofins	SFBA0-7	5.37	54.678734	18.342915	54.678813	18.346460	54.676754	18.348094	54.677199	18.343460
Stanisłw Selke	7	12	12_66_w2	86/18/892	12_66	2018-03-26	2018-05-16	Ioxynil-Octanoate	mg/kg	0.03	p.0,03			1	Eurofins	SFBA0-7	5.37	54.678734	18.342915	54.678813	18.346460	54.676754	18.348094	54.677199	18.343460
Stanisłw Selke	7	12	12_66_w2	86/18/892	12_66	2018-03-26	2018-05-16	Iprobenfos	mg/kg	0.03	p.0,03			1	Eurofins	SFBA0-7	5.37	54.678734	18.342915	54.678813	18.346460	54.676754	18.348094	54.677199	18.343460
Stanisłw Selke	7	12	12_66_w2	86/18/892	12_66	2018-03-26	2018-05-16	Iprodion	mg/kg	0.03	p.0,03			1	Eurofins	SFBA0-7	5.37	54.678734	18.342915	54.678813	18.346460	54.676754	18.348094	54.677199	18.343460
Stanisłw Selke	7	12	12_66_w2	86/18/892	12_66	2018-03-26	2018-05-16	Isazophos	mg/kg	0.03	p.0,03			1	Eurofins	SFBA0-7	5.37	54.678734	18.342915	54.678813	18.346460	54.676754	18.348094	54.677199	18.343460
Stanisłw Selke	7	12	12_66_w2	86/18/892	12_66	2018-03-26	2018-05-16	Isobenzan	mg/kg	0.015	p.0,015			1	Eurofins	SFBA0-7	5.37	54.678734	18.342915	54.678813	18.346460	54.676754	18.348094	54.677199	18.343460
Stanisłw Selke	7	12	12_66_w2	86/18/892	12_66	2018-03-26	2018-05-16	Isocarbofos	mg/kg	0.03	p.0,03			1	Eurofins	SFBA0-7	5.37	54.678734	18.342915	54.678813	18.346460	54.676754	18.348094	54.677199	18.343460
Stanisłw Selke	7	12	12_66_w2	86/18/892	12_66	2018-03-26	2018-05-16	Izodryna	mg/kg	0.015	p.0,015			1	Eurofins	SFBA0-7	5.37	54.678734	18.342915	54.678813	18.346460	54.676754	18.348094	54.677199	18.343460
Stanisłw Selke	7	12	12_66_w2	86/18/892	12_66	2018-03-26	2018-05-16	Izofenfos	mg/kg	0.015	p.0,015			1	Eurofins	SFBA0-7	5.37	54.678734	18.342915	54.678813	18.346460	54.676754	18.348094	54.677199	18.343460
Stanisłw Selke	7	12	12_66_w2	86/18/892	12_66	2018-03-26	2018-05-16	Isofenphos-Methyl	mg/kg	0.015	p.0,015			1	Eurofins	SFBA0-7	5.37	54.678734	18.342915	54.678813	18.346460	54.676754	18.348094	54.677199	18.343460
Stanisłw Selke	7	12	12_66_w2	86/18/892	12_66	2018-03-26	2018-05-16	Isomethiozin	mg/kg	0.03	p.0,03			1	Eurofins	SFBA0-7	5.37	54.678734	18.342915	54.678813	18.346460	54.676754	18.348094	54.677199	18.343460
Stanisłw Selke	7	12	12_66_w2	86/18/892	12_66	2018-03-26	2018-05-16	Isopropalin	mg/kg	0.015	p.0,015			1	Eurofins	SFBA0-7	5.37	54.678734	18.342915	54.678813	18.346460	54.676754	18.348094	54.677199	18.343460
Stanisłw Selke	7	12	12_66_w2	86/18/892	12_66	2018-03-26	2018-05-16	Isoxadifen-ethyl	mg/kg	0.03	p.0,03			1	Eurofins	SFBA0-7	5.37	54.678734	18.342915	54.678813	18.346460	54.676754	18.348094	54.677199	18.343460
Stanisłw Selke	7	12	12_66_w2	86/18/892	12_66	2018-03-26	2018-05-16	Krezoksym-metylu	mg/kg	0.015	p.0,015			1	Eurofins	SFBA0-7	5.37	54.678734	18.342915	54.678813	18.346460	54.676754	18.348094	54.677199	18.343460
Stanisłw Selke	7	12	12_66_w2	86/18/892	12_66	2018-03-26	2018-05-16	Lactofen	mg/kg	0.03	p.0,03			1	Eurofins	SFBA0-7	5.37	54.678734	18.342915	54.678813	18.346460	54.676754	18.348094	54.677199	18.343460
Stanisłw Selke	7	12	12_66_w2	86/18/892	12_66	2018-03-26	2018-05-16	Leptophos	mg/kg	0.03	p.0,03			1	Eurofins	SFBA0-7	5.37	54.678734	18.342915	54.678813	18.346460	54.676754	18.348094	54.677199	18.343460
Stanisłw Selke	7	12	12_66_w2	86/18/892	12_66	2018-03-26	2018-05-16	Lufenuron	mg/kg	0.036	p.0,036			1	Eurofins	SFBA0-7	5.37	54.678734	18.342915	54.678813	18.346460	54.676754	18.348094	54.677199	18.343460
Stanisłw Selke	7	12	12_66_w2	86/18/892	12_66	2018-03-26	2018-05-16	Malaokson	mg/kg	0.015	p.0,015			1	Eurofins	SFBA0-7	5.37	54.678734	18.342915	54.678813	18.346460	54.676754	18.348094	54.677199	18.343460
Stanisłw Selke	7	12	12_66_w2	86/18/892	12_66	2018-03-26	2018-05-16	Malation	mg/kg	0.03	p.0,03			1	Eurofins	SFBA0-7	5.37	54.678734	18.342915	54.678813	18.346460	54.676754	18.348094	54.677199	18.343460
Stanisłw Selke	7	12	12_66_w2	86/18/892	12_66	2018-03-26	2018-05-16	Mekarbam	mg/kg	0.03	p.0,03			1	Eurofins	SFBA0-7	5.37	54.678734	18.342915	54.678813	18.346460	54.676754	18.348094	54.677199	18.343460
Stanisłw Selke	7	12	12_66_w2	86/18/892	12_66	2018-03-26	2018-05-16	Mephosfolan	mg/kg	0.03	p.0,03			1	Eurofins	SFBA0-7	5.37	54.678734	18.342915	54.678813	18.346460	54.676754	18.348094	54.677199	18.343460
Stanisłw Selke	7	12	12_66_w2	86/18/892	12_66	2018-03-26	2018-05-16	Merphos	mg/kg	0.03	p.0,03			1	Eurofins	SFBA0-7	5.37	54.678734	18.342915	54.678813	18.346460	54.676754	18.348094	54.677199	18.343460
Stanisłw Selke	7	12	12_66_w2	86/18/892	12_66	2018-03-26	2018-05-16	Metazachlor	mg/kg	0.03	p.0,03			1	Eurofins	SFBA0-7	5.37	54.678734	18.342915	54.678813	18.346460	54.676754	18.348094	54.677199	18.343460
Stanisłw Selke	7	12	12_66_w2	86/18/892	12_66	2018-03-26	2018-05-16	Metakrifos	mg/kg	0.15	p.0,15			1	Eurofins	SFBA0-7	5.37	54.678734	18.342915	54.678813	18.346460	54.676754	18.348094	54.677199	18.343460
Stanisłw Selke	7	12	12_66_w2	86/18/892	12_66	2018-03-26	2018-05-16	Metydation	mg/kg	0.036	p.0,03600			1	Eurofins	SFBA0-7	5.37	54.678734	18.342915	54.678813	18.346460	54.676754	18.348094	54.677199	18.343460
Stanisłw Selke	7	12	12_66_w2	86/18/892	12_66	2018-03-26	2018-05-16	Metoksychlor	mg/kg	0.015	p.0,015			1	Eurofins	SFBA0-7	5.37	54.678734	18.342915	54.678813	18.346460	54.676754	18.348094	54.677199	18.343460
Stanisłw Selke	7	12	12_66_w2	86/18/892	12_66	2018-03-26	2018-05-16	Metolachlor	mg/kg	0.15	p.0,15			1	Eurofins	SFBA0-7	5.37	54.678734	18.342915	54.678813	18.346460	54.676754	18.348094	54.677199	18.343460
Stanisłw Selke	7	12	12_66_w2	86/18/892	12_66	2018-03-26	2018-05-16	Metrafenon	mg/kg	0.15	p.0,15			1	Eurofins	SFBA0-7	5.37	54.678734	18.342915	54.678813	18.346460	54.676754	18.348094	54.677199	18.343460
Stanisłw Selke	7	12	12_66_w2	86/18/892	12_66	2018-03-26	2018-05-16	Metribuzyn	mg/kg	0.03	p.0,03			1	Eurofins	SFBA0-7	5.37	54.678734	18.342915	54.678813	18.346460	54.676754	18.348094	54.677199	18.343460
Stanisłw Selke	7	12	12_66_w2	86/18/892	12_66	2018-03-26	2018-05-16	Mevinfos	mg/kg	0.03	p.0,03			1	Eurofins	SFBA0-7	5.37	54.678734	18.342915	54.678813	18.346460	54.676754	18.348094	54.677199	18.343460
Stanisłw Selke	7	12	12_66_w2	86/18/892	12_66	2018-03-26	2018-05-16	Mirex	mg/kg	0.015	p.0,015			1	Eurofins	SFBA0-7	5.37	54.678734	18.342915	54.678813	18.346460	54.676754	18.348094	54.677199	18.343460
Stanisłw Selke	7	12	12_66_w2	86/18/892	12_66	2018-03-26	2018-05-16	Molinate	mg/kg	0.045	p.0,045			1	Eurofins	SFBA0-7	5.37	54.678734	18.342915	54.678813	18.346460	54.676754	18.348094	54.677199	18.343460
Stanisłw Selke	7	12	12_66_w2	86/18/892	12_66	2018-03-26	2018-05-16	Myklobutanil	mg/kg	0.015	0.015			1	Eurofins	SFBA0-7	5.37	54.678734	18.342915	54.678813	18.346460	54.676754	18.348094	54.677199	18.343460
Stanisłw Selke	7	12	12_66_w2	86/18/892	12_66	2018-03-26	2018-05-16	Nitralin	mg/kg	0.03	p.0,03			1	Eurofins	SFBA0-7	5.37	54.678734	18.342915	54.678813	18.346460	54.676754	18.348094	54.677199	18.343460
Stanisłw Selke	7	12	12_66_w2	86/18/892	12_66	2018-03-26	2018-05-16	Nitrapyrin	mg/kg	0.06	p.0,06			1	Eurofins	SFBA0-7	5.37	54.678734	18.342915	54.678813	18.346460	54.676754	18.348094	54.677199	18.343460
Stanisłw Selke	7	12	12_66_w2	86/18/892	12_66	2018-03-26	2018-05-16	Nitrofen	mg/kg	0.03	p.0,03			1	Eurofins	SFBA0-7	5.37	54.678734	18.342915	54.678813	18.346460	54.676754	18.348094	54.677199	18.343460
Stanisłw Selke	7	12	12_66_w2	86/18/892	12_66	2018-03-26	2018-05-16	Nitrothal-isopropyl	mg/kg	0.03	p.0,03			1	Eurofins	SFBA0-7	5.37	54.678734	18.342915	54.678813	18.346460	54.676754	18.348094	54.677199	18.343460
Stanisłw Selke	7	12	12_66_w2	86/18/892	12_66	2018-03-26	2018-05-16	Norflurazon	mg/kg	0.15	p.0,15			1	Eurofins	SFBA0-7	5.37	54.678734	18.342915	54.678813	18.346460	54.676754	18.348094	54.677199	18.343460
Stanisłw Selke	7	12	12_66_w2	86/18/892	12_66	2018-03-26	2018-05-16	Nuarimol	mg/kg	0.03	p.0,03			1	Eurofins	SFBA0-7	5.37	54.678734	18.342915	54.678813	18.346460	54.676754	18.348094	54.677199	18.343460
Stanisłw Selke	7	12	12_66_w2	86/18/892	12_66	2018-03-26	2018-05-16	Ometoat	mg/kg	0.3	p.0,3			1	Eurofins	SFBA0-7	5.37	54.678734	18.342915	54.678813	18.346460	54.676754	18.348094	54.677199	18.343460
Stanisłw Selke	7	12	12_66_w2	86/18/892	12_66	2018-03-26	2018-05-16	Oxadiazon	mg/kg	0.015	p.0,015			1	Eurofins	SFBA0-7	5.37	54.678734	18.342915	54.678813	18.346460	54.676754	18.348094	54.677199	18.343460
Stanisłw Selke	7	12	12_66_w2	86/18/892	12_66	2018-03-26	2018-05-16	Oxydemeton-methyl	mg/kg	0.03	p.0,03			1	Eurofins	SFBA0-7	5.37	54.678734	18.342915	54.678813	18.346460	54.676754	18.348094	54.677199	18.343460
Stanisłw Selke	7	12	12_66_w2	86/18/892	12_66	2018-03-26	2018-05-16	Oksyfluoroten	mg/kg	0.03	p.0,03			1	Eurofins	SFBA0-7	5.37	54.678734	18.342915	54.678813	18.346460	54.676754	18.348094	54.677199	18.343460
Stanisłw Selke	7	12	12_66_w2	86/18/892	12_66	2018-03-26	2018-05-16	Paklobutrazol	mg/kg	0.12	p.0,12			1	Eurofins	SFBA0-7	5.37	54.678734	18.342915	54.678813	18.346460	54.676754	18.348094	54.677199	18.343460
Stanisłw Selke	7	12	12_66_w2	86/18/892	12_66	2018-03-26	2018-05-16	Paraoxon-ethyl	mg/kg	0.045	p.0,045			1	Eurofins	SFBA0-7	5.37	54.678734	18.342915	54.678813	18.346460	54.676754	18.348094	54.677199	18.343460
Stanisłw Selke	7	12	12_66_w2	86/18/892	12_66	2018-03-26	2018-05-16	Paraokson metylowy	mg/kg	0.045	p.0,045			1	Eurofins	SFBA0-7	5.37	54.678734	18.342915	54.678813	18.346460	54.676754	18.348094	54.677199	18.343460
Stanisłw Selke	7	12	12_66_w2	86/18/892	12_66	2018-03-26	2018-05-16	Paration	mg/kg	0.015	p.0,015			1	Eurofins	SFBA0-7	5.37	54.678734	18.342915	54.678813	18.346460	54.676754	18.348094	54.677199	18.343460
Stanisłw Selke	7	12	12_66_w2	86/18/892	12_66	2018-03-26	2018-05-16	Paration metylu	mg/kg	0.015	p.0,015			1	Eurofins	SFBA0-7	5.37	54.678734	18.342915	54.678813	18.346460	54.676754	18.348094	54.677199	18.343460
Stanisłw Selke	7	12	12_66_w2	86/18/892	12_66	2018-03-26	2018-05-16	Paration metylu/Paraokson metylu (suma)	mg/kg	0.015	p.0,015			1	Eurofins	SFBA0-7	5.37	54.678734	18.342915	54.678813	18.346460	54.676754	18.348094	54.677199	18.343460
Stanisłw Selke	7	12	12_66_w2	86/18/892	12_66	2018-03-26	2018-05-16	PCB IUPAC 101	mg/kg	0.015	p.0,015			1	Eurofins	SFBA0-7	5.37	54.678734	18.342915	54.678813	18.346460	54.676754	18.348094	54.677199	18.343460
Stanisłw Selke	7	12	12_66_w2	86/18/892	12_66	2018-03-26	2018-05-16	PCB 118	mg/kg	0.015	p.0,015			1	Eurofins	SFBA0-7	5.37	54.678734	18.342915	54.678813	18.346460	54.676754	18.348094	54.677199	18.343460
Stanisłw Selke	7	12	12_66_w2	86/18/892	12_66	2018-03-26	2018-05-16	PCB 138	mg/kg	0.015	p.0,015			1	Eurofins	SFBA0-7	5.37	54.678734	18.342915	54.678813	18.346460	54.676754	18.348094	54.677199	18.343460
Stanisłw Selke	7	12	12_66_w2	86/18/892	12_66	2018-03-26	2018-05-16	PCB 153	mg/kg	0.015	p.0,015			1	Eurofins	SFBA0-7	5.37	54.678734	18.342915	54.678813	18.346460	54.676754	18.348094	54.677199	18.343460
Stanisłw Selke	7	12	12_66_w2	86/18/892	12_66	2018-03-26	2018-05-16	PCB 180	mg/kg	0.015	p.0,015			1	Eurofins	SFBA0-7	5.37	54.678734	18.342915	54.678813	18.346460	54.676754	18.348094	54.677199	18.343460
Stanisłw Selke	7	12	12_66_w2	86/18/892	12_66	2018-03-26	2018-05-16	PCB 28	mg/kg	0.015	p.0,015			1	Eurofins	SFBA0-7	5.37	54.678734	18.342915	54.678813	18.346460	54.676754	18.348094	54.677199	18.343460
Stanisłw Selke	7	12	12_66_w2	86/18/892	12_66	2018-03-26	2018-05-16	PCB 52	mg/kg	0.015	p.0,015			1	Eurofins	SFBA0-7	5.37	54.678734	18.342915	54.678813	18.346460	54.676754	18.348094	54.677199	18.343460
Stanisłw Selke	7	12	12_66_w2	86/18/892	12_66	2018-03-26	2018-05-16	Penkonazol	mg/kg	0.03	p.0,03			1	Eurofins	SFBA0-7	5.37	54.678734	18.342915	54.678813	18.346460	54.676754	18.348094	54.677199	18.343460
Stanisłw Selke	7	12	12_66_w2	86/18/892	12_66	2018-03-26	2018-05-16	Pendimetalina	mg/kg	0.015	p.0,015			1	Eurofins	SFBA0-7	5.37	54.678734	18.342915	54.678813	18.346460	54.676754	18.348094	54.677199	18.343460
Stanisłw Selke	7	12	12_66_w2	86/18/892	12_66	2018-03-26	2018-05-16	Pentachloranisol	mg/kg	0.015	p.0,015			1	Eurofins	SFBA0-7	5.37	54.678734	18.342915	54.678813	18.346460	54.676754	18.348094	54.677199	18.343460
Stanisłw Selke	7	12	12_66_w2	86/18/892	12_66	2018-03-26	2018-05-16	Pentachloraniline	mg/kg	0.03	p.0,03			1	Eurofins	SFBA0-7	5.37	54.678734	18.342915	54.678813	18.346460	54.676754	18.348094	54.677199	18.343460
Stanisłw Selke	7	12	12_66_w2	86/18/892	12_66	2018-03-26	2018-05-16	Pentachlorobenzen	mg/kg	0.015	p.0,015			1	Eurofins	SFBA0-7	5.37	54.678734	18.342915	54.678813	18.346460	54.676754	18.348094	54.677199	18.343460
Stanisłw Selke	7	12	12_66_w2	86/18/892	12_66	2018-03-26	2018-05-16	Pentachlorothioanisole	mg/kg	0.03	p.0,03			1	Eurofins	SFBA0-7	5.37	54.678734	18.342915	54.678813	18.346460	54.676754	18.348094	54.677199	18.343460
Stanisłw Selke	7	12	12_66_w2	86/18/892	12_66	2018-03-26	2018-05-16	Permetryna	mg/kg	0.06	p.0,06			1	Eurofins	SFBA0-7	5.37	54.678734	18.342915	54.678813	18.346460	54.676754	18.348094	54.677199	18.343460
Stanisłw Selke	7	12	12_66_w2	86/18/892	12_66	2018-03-26	2018-05-16	Pertan	mg/kg	0.6	p.0,6			1	Eurofins	SFBA0-7	5.37	54.678734	18.342915	54.678813	18.346460	54.676754	18.348094	54.677199	18.343460
Stanisłw Selke	7	12	12_66_w2	86/18/892	12_66	2018-03-26	2018-05-16	Phenkapton	mg/kg	0.03	p.0,03			1	Eurofins	SFBA0-7	5.37	54.678734	18.342915	54.678813	18.346460	54.676754	18.348094	54.677199	18.343460
Stanisłw Selke	7	12	12_66_w2	86/18/892	12_66	2018-03-26	2018-05-16	Phenothrin	mg/kg	0.03	p.0,03			1	Eurofins	SFBA0-7	5.37	54.678734	18.342915	54.678813	18.346460	54.676754	18.348094	54.677199	18.343460
Stanisłw Selke	7	12	12_66_w2	86/18/892	12_66	2018-03-26	2018-05-16	Fentoat	mg/kg	0.03	p.0,03			1	Eurofins	SFBA0-7	5.37	54.678734	18.342915	54.678813	18.346460	54.676754	18.348094	54.677199	18.343460
Stanisłw Selke	7	12	12_66_w2	86/18/892	12_66	2018-03-26	2018-05-16	Fosalon	mg/kg	0.03	p.0,03			1	Eurofins	SFBA0-7	5.37	54.678734	18.342915	54.678813	18.346460	54.676754	18.348094	54.677199	18.343460
Stanisłw Selke	7	12	12_66_w2	86/18/892	12_66	2018-03-26	2018-05-16	Phosfolane	mg/kg	0.03	p.0,03			1	Eurofins	SFBA0-7	5.37	54.678734	18.342915	54.678813	18.346460	54.676754	18.348094	54.677199	18.343460
Stanisłw Selke	7	12	12_66_w2	86/18/892	12_66	2018-03-26	2018-05-16	Fosmet	mg/kg	0.03	p.0,03			1	Eurofins	SFBA0-7	5.37	54.678734	18.342915	54.678813	18.346460	54.676754	18.348094	54.677199	18.343460
Stanisłw Selke	7	12	12_66_w2	86/18/892	12_66	2018-03-26	2018-05-16	Picolinafen	mg/kg	0.03	p.0,03			1	Eurofins	SFBA0-7	5.37	54.678734	18.342915	54.678813	18.346460	54.676754	18.348094	54.677199	18.343460
Stanisłw Selke	7	12	12_66_w2	86/18/892	12_66	2018-03-26	2018-05-16	Pikoksystrobina	mg/kg	0.06	p.0,06			1	Eurofins	SFBA0-7	5.37	54.678734	18.342915	54.678813	18.346460	54.676754	18.348094	54.677199	18.343460
Stanisłw Selke	7	12	12_66_w2	86/18/892	12_66	2018-03-26	2018-05-16	Piperophos	mg/kg	0.03	p.0,03			1	Eurofins	SFBA0-7	5.37	54.678734	18.342915	54.678813	18.346460	54.676754	18.348094	54.677199	18.343460
Stanisłw Selke	7	12	12_66_w2	86/18/892	12_66	2018-03-26	2018-05-16	Pirymifos metylowy	mg/kg	0.03	p.0,03			1	Eurofins	SFBA0-7	5.37	54.678734	18.342915	54.678813	18.346460	54.676754	18.348094	54.677199	18.343460
Stanisłw Selke	7	12	12_66_w2	86/18/892	12_66	2018-03-26	2018-05-16	Pirymifos etylu	mg/kg	0.03	p.0,03			1	Eurofins	SFBA0-7	5.37	54.678734	18.342915	54.678813	18.346460	54.676754	18.348094	54.677199	18.343460
Stanisłw Selke	7	12	12_66_w2	86/18/892	12_66	2018-03-26	2018-05-16	Plifenate	mg/kg	0.03	p.0,03			1	Eurofins	SFBA0-7	5.37	54.678734	18.342915	54.678813	18.346460	54.676754	18.348094	54.677199	18.343460
Stanisłw Selke	7	12	12_66_w2	86/18/892	12_66	2018-03-26	2018-05-16	Praletryna	mg/kg	0.03	p.0,03			1	Eurofins	SFBA0-7	5.37	54.678734	18.342915	54.678813	18.346460	54.676754	18.348094	54.677199	18.343460
Stanisłw Selke	7	12	12_66_w2	86/18/892	12_66	2018-03-26	2018-05-16	Procymidon	mg/kg	0.045	p.0,045			1	Eurofins	SFBA0-7	5.37	54.678734	18.342915	54.678813	18.346460	54.676754	18.348094	54.677199	18.343460
Stanisłw Selke	7	12	12_66_w2	86/18/892	12_66	2018-03-26	2018-05-16	Profenfos	mg/kg	0.015	p.0,015			1	Eurofins	SFBA0-7	5.37	54.678734	18.342915	54.678813	18.346460	54.676754	18.348094	54.677199	18.343460
Stanisłw Selke	7	12	12_66_w2	86/18/892	12_66	2018-03-26	2018-05-16	Profluralina	mg/kg	0.015	p.0,015			1	Eurofins	SFBA0-7	5.37	54.678734	18.342915	54.678813	18.346460	54.676754	18.348094	54.677199	18.343460
Stanisłw Selke	7	12	12_66_w2	86/18/892	12_66	2018-03-26	2018-05-16	Propachlor	mg/kg	0.03	p.0,03			1	Eurofins	SFBA0-7	5.37	54.678734	18.342915	54.678813	18.346460	54.676754	18.348094	54.677199	18.343460
Stanisłw Selke	7	12	12_66_w2	86/18/892	12_66	2018-03-26	2018-05-16	Propanil	mg/kg	0.03	p.0,03			1	Eurofins	SFBA0-7	5.37	54.678734	18.342915	54.678813	18.346460	54.676754	18.348094	54.677199	18.343460
Stanisłw Selke	7	12	12_66_w2	86/18/892	12_66	2018-03-26	2018-05-16	Propazyna	mg/kg	0.15	p.0,15			1	Eurofins	SFBA0-7	5.37	54.678734	18.342915	54.678813	18.346460	54.676754	18.348094	54.677199	18.343460
Stanisłw Selke	7	12	12_66_w2	86/18/892	12_66	2018-03-26	2018-05-16	Propetamfos	mg/kg	0.015	p.0,015			1	Eurofins	SFBA0-7	5.37	54.678734	18.342915	54.678813	18.346460	54.676754	18.348094	54.677199	18.343460
Stanisłw Selke	7	12	12_66_w2	86/18/892	12_66	2018-03-26	2018-05-16	Propikonazol	mg/kg	0.03	p.0,03			1	Eurofins	SFBA0-7	5.37	54.678734	18.342915	54.678813	18.346460	54.676754	18.348094	54.677199	18.343460
Stanisłw Selke	7	12	12_66_w2	86/18/892	12_66	2018-03-26	2018-05-16	Propyzamid	mg/kg	0.03	p.0,03			1	Eurofins	SFBA0-7	5.37	54.678734	18.342915	54.678813	18.346460	54.676754	18.348094	54.677199	18.343460
Stanisłw Selke	7	12	12_66_w2	86/18/892	12_66	2018-03-26	2018-05-16	Protiofos	mg/kg	0.015	p.0,015			1	Eurofins	SFBA0-7	5.37	54.678734	18.342915	54.678813	18.346460	54.676754	18.348094	54.677199	18.343460
Stanisłw Selke	7	12	12_66_w2	86/18/892	12_66	2018-03-26	2018-05-16	Prothoat	mg/kg	0.03	p.0,03			1	Eurofins	SFBA0-7	5.37	54.678734	18.342915	54.678813	18.346460	54.676754	18.348094	54.677199	18.343460
Stanisłw Selke	7	12	12_66_w2	86/18/892	12_66	2018-03-26	2018-05-16	Pyraclofos	mg/kg	0.03	p.0,03			1	Eurofins	SFBA0-7	5.37	54.678734	18.342915	54.678813	18.346460	54.676754	18.348094	54.677199	18.343460
Stanisłw Selke	7	12	12_66_w2	86/18/892	12_66	2018-03-26	2018-05-16	Pyraflufen-ethyl	mg/kg	0.06	p.0,06			1	Eurofins	SFBA0-7	5.37	54.678734	18.342915	54.678813	18.346460	54.676754	18.348094	54.677199	18.343460
Stanisłw Selke	7	12	12_66_w2	86/18/892	12_66	2018-03-26	2018-05-16	Pirazofos	mg/kg	0.03	p.0,03			1	Eurofins	SFBA0-7	5.37	54.678734	18.342915	54.678813	18.346460	54.676754	18.348094	54.677199	18.343460
Stanisłw Selke	7	12	12_66_w2	86/18/892	12_66	2018-03-26	2018-05-16	Pyretryny	mg/kg	0.06	p.0,06			1	Eurofins	SFBA0-7	5.37	54.678734	18.342915	54.678813	18.346460	54.676754	18.348094	54.677199	18.343460
Stanisłw Selke	7	12	12_66_w2	86/18/892	12_66	2018-03-26	2018-05-16	Pirydaben	mg/kg	0.015	p.0,015			1	Eurofins	SFBA0-7	5.37	54.678734	18.342915	54.678813	18.346460	54.676754	18.348094	54.677199	18.343460
Stanisłw Selke	7	12	12_66_w2	86/18/892	12_66	2018-03-26	2018-05-16	Pyridaphenthion	mg/kg	0.03	p.0,03			1	Eurofins	SFBA0-7	5.37	54.678734	18.342915	54.678813	18.346460	54.676754	18.348094	54.677199	18.343460
Stanisłw Selke	7	12	12_66_w2	86/18/892	12_66	2018-03-26	2018-05-16	Pyrifenox	mg/kg	0.03	p.0,03			1	Eurofins	SFBA0-7	5.37	54.678734	18.342915	54.678813	18.346460	54.676754	18.348094	54.677199	18.343460
Stanisłw Selke	7	12	12_66_w2	86/18/892	12_66	2018-03-26	2018-05-16	Pirimithate	mg/kg	0.15	p.0,15			1	Eurofins	SFBA0-7	5.37	54.678734	18.342915	54.678813	18.346460	54.676754	18.348094	54.677199	18.343460
Stanisłw Selke	7	12	12_66_w2	86/18/892	12_66	2018-03-26	2018-05-16	Chinalofos	mg/kg	0.015	p.0,015			1	Eurofins	SFBA0-7	5.37	54.678734	18.342915	54.678813	18.346460	54.676754	18.348094	54.677199	18.343460
Stanisłw Selke	7	12	12_66_w2	86/18/892	12_66	2018-03-26	2018-05-16	Chinoksyfen	mg/kg	0.045	p.0,045			1	Eurofins	SFBA0-7	5.37	54.678734	18.342915	54.678813	18.346460	54.676754	18.348094	54.677199	18.343460
Stanisłw Selke	7	12	12_66_w2	86/18/892	12_66	2018-03-26	2018-05-16	Kwintocen	mg/kg	0.015	p.0,015			1	Eurofins	SFBA0-7	5.37	54.678734	18.342915	54.678813	18.346460	54.676754	18.348094	54.677199	18.343460
Stanisłw Selke	7	12	12_66_w2	86/18/892	12_66	2018-03-26	2018-05-16	Quintozene (suma)	mg/kg	0.015	p.0,015			1	Eurofins	SFBA0-7	5.37	54.678734	18.342915	54.678813	18.346460	54.676754	18.348094	54.677199	18.343460
Stanisłw Selke	7	12	12_66_w2	86/18/892	12_66	2018-03-26	2018-05-16	Chizalofop etylowy	mg/kg	0.03	p.0,03			1	Eurofins	SFBA0-7	5.37	54.678734	18.342915	54.678813	18.346460	54.676754	18.348094	54.677199	18.343460
Stanisłw Selke	7	12	12_66_w2	86/18/892	12_66	2018-03-26	2018-05-16	Resmetryna	mg/kg	0.3	p.0,3			1	Eurofins	SFBA0-7	5.37	54.678734	18.342915	54.678813	18.346460	54.676754	18.348094	54.677199	18.343460
Stanisłw Selke	7	12	12_66_w2	86/18/892	12_66	2018-03-26	2018-05-16	S421 Octachlordipropyleter)	mg/kg	0.03	p.0,03			1	Eurofins	SFBA0-7	5.37	54.678734	18.342915	54.678813	18.346460	54.676754	18.348094	54.677199	18.343460
Stanisłw Selke	7	12	12_66_w2	86/18/892	12_66	2018-03-26	2018-05-16	Spiromesifen	mg/kg	0.03	p.0,03			1	Eurofins	SFBA0-7	5.37	54.678734	18.342915	54.678813	18.346460	54.676754	18.348094	54.677199	18.343460
Stanisłw Selke	7	12	12_66_w2	86/18/892	12_66	2018-03-26	2018-05-16	Sulfotep	mg/kg	0.03	p.0,03			1	Eurofins	SFBA0-7	5.37	54.678734	18.342915	54.678813	18.346460	54.676754	18.348094	54.677199	18.343460
Stanisłw Selke	7	12	12_66_w2	86/18/892	12_66	2018-03-26	2018-05-16	Sulprofos	mg/kg	0.03	p.0,03			1	Eurofins	SFBA0-7	5.37	54.678734	18.342915	54.678813	18.346460	54.676754	18.348094	54.677199	18.343460
Stanisłw Selke	7	12	12_66_w2	86/18/892	12_66	2018-03-26	2018-05-16	Swep	mg/kg	0.03	p.0,03			1	Eurofins	SFBA0-7	5.37	54.678734	18.342915	54.678813	18.346460	54.676754	18.348094	54.677199	18.343460
Stanisłw Selke	7	12	12_66_w2	86/18/892	12_66	2018-03-26	2018-05-16	tau-Fluvalinate	mg/kg	0.015	p.0,015			1	Eurofins	SFBA0-7	5.37	54.678734	18.342915	54.678813	18.346460	54.676754	18.348094	54.677199	18.343460
Stanisłw Selke	7	12	12_66_w2	86/18/892	12_66	2018-03-26	2018-05-16	Tebupirimfos	mg/kg	0.015	p.0,015			1	Eurofins	SFBA0-7	5.37	54.678734	18.342915	54.678813	18.346460	54.676754	18.348094	54.677199	18.343460
Stanisłw Selke	7	12	12_66_w2	86/18/892	12_66	2018-03-26	2018-05-16	Technazen	mg/kg	0.015	p.0,015			1	Eurofins	SFBA0-7	5.37	54.678734	18.342915	54.678813	18.346460	54.676754	18.348094	54.677199	18.343460
Stanisłw Selke	7	12	12_66_w2	86/18/892	12_66	2018-03-26	2018-05-16	Teflutryna	mg/kg	0.015	p.0,015			1	Eurofins	SFBA0-7	5.37	54.678734	18.342915	54.678813	18.346460	54.676754	18.348094	54.677199	18.343460
Stanisłw Selke	7	12	12_66_w2	86/18/892	12_66	2018-03-26	2018-05-16	Temephos	mg/kg	0.03	p.0,03			1	Eurofins	SFBA0-7	5.37	54.678734	18.342915	54.678813	18.346460	54.676754	18.348094	54.677199	18.343460
Stanisłw Selke	7	12	12_66_w2	86/18/892	12_66	2018-03-26	2018-05-16	Terbufos	mg/kg	0.015	p.0,015			1	Eurofins	SFBA0-7	5.37	54.678734	18.342915	54.678813	18.346460	54.676754	18.348094	54.677199	18.343460
Stanisłw Selke	7	12	12_66_w2	86/18/892	12_66	2018-03-26	2018-05-16	Tetrachlorwinfos	mg/kg	0.015	p.0,015			1	Eurofins	SFBA0-7	5.37	54.678734	18.342915	54.678813	18.346460	54.676754	18.348094	54.677199	18.343460
Stanisłw Selke	7	12	12_66_w2	86/18/892	12_66	2018-03-26	2018-05-16	Tetrakonazol	mg/kg	0.075	p.0,075			1	Eurofins	SFBA0-7	5.37	54.678734	18.342915	54.678813	18.346460	54.676754	18.348094	54.677199	18.343460
Stanisłw Selke	7	12	12_66_w2	86/18/892	12_66	2018-03-26	2018-05-16	Tetradifon	mg/kg	0.015	p.0,015			1	Eurofins	SFBA0-7	5.37	54.678734	18.342915	54.678813	18.346460	54.676754	18.348094	54.677199	18.343460
Stanisłw Selke	7	12	12_66_w2	86/18/892	12_66	2018-03-26	2018-05-16	Tetrametryna	mg/kg	0.03	p.0,03			1	Eurofins	SFBA0-7	5.37	54.678734	18.342915	54.678813	18.346460	54.676754	18.348094	54.677199	18.343460
Stanisłw Selke	7	12	12_66_w2	86/18/892	12_66	2018-03-26	2018-05-16	Tetrasul	mg/kg	0.03	p.0,03			1	Eurofins	SFBA0-7	5.37	54.678734	18.342915	54.678813	18.346460	54.676754	18.348094	54.677199	18.343460
Stanisłw Selke	7	12	12_66_w2	86/18/892	12_66	2018-03-26	2018-05-16	Tolklofos metylu	mg/kg	0.03	p.0,03			1	Eurofins	SFBA0-7	5.37	54.678734	18.342915	54.678813	18.346460	54.676754	18.348094	54.677199	18.343460
Stanisłw Selke	7	12	12_66_w2	86/18/892	12_66	2018-03-26	2018-05-16	Tolilofluanid	mg/kg	0.03	p.0,03			1	Eurofins	SFBA0-7	5.37	54.678734	18.342915	54.678813	18.346460	54.676754	18.348094	54.677199	18.343460
Stanisłw Selke	7	12	12_66_w2	86/18/892	12_66	2018-03-26	2018-05-16	Toxaphene Parlar 26	mg/kg	0.01	p.0,01			1	Eurofins	SFBA0-7	5.37	54.678734	18.342915	54.678813	18.346460	54.676754	18.348094	54.677199	18.343460
Stanisłw Selke	7	12	12_66_w2	86/18/892	12_66	2018-03-26	2018-05-16	Toxaphene Parlar 50	mg/kg	0.01	p.0,01			1	Eurofins	SFBA0-7	5.37	54.678734	18.342915	54.678813	18.346460	54.676754	18.348094	54.677199	18.343460
Stanisłw Selke	7	12	12_66_w2	86/18/892	12_66	2018-03-26	2018-05-16	Toxaphene Parlar 62	mg/kg	0.01	p.0,01			1	Eurofins	SFBA0-7	5.37	54.678734	18.342915	54.678813	18.346460	54.676754	18.348094	54.677199	18.343460
Stanisłw Selke	7	12	12_66_w2	86/18/892	12_66	2018-03-26	2018-05-16	Transfluthrin	mg/kg	0.03	p.0,03			1	Eurofins	SFBA0-7	5.37	54.678734	18.342915	54.678813	18.346460	54.676754	18.348094	54.677199	18.343460
Stanisłw Selke	7	12	12_66_w2	86/18/892	12_66	2018-03-26	2018-05-16	Triadimefon	mg/kg	0.03	p.0,03			1	Eurofins	SFBA0-7	5.37	54.678734	18.342915	54.678813	18.346460	54.676754	18.348094	54.677199	18.343460
Stanisłw Selke	7	12	12_66_w2	86/18/892	12_66	2018-03-26	2018-05-16	Triadimenol	mg/kg	0.15	p.0,15			1	Eurofins	SFBA0-7	5.37	54.678734	18.342915	54.678813	18.346460	54.676754	18.348094	54.677199	18.343460
Stanisłw Selke	7	12	12_66_w2	86/18/892	12_66	2018-03-26	2018-05-16	Triadimenol/Triadimefon(suma)	mg/kg	0.15	p.0,15			1	Eurofins	SFBA0-7	5.37	54.678734	18.342915	54.678813	18.346460	54.676754	18.348094	54.677199	18.343460
Stanisłw Selke	7	12	12_66_w2	86/18/892	12_66	2018-03-26	2018-05-16	Trialat	mg/kg	0.03	p.0,03			1	Eurofins	SFBA0-7	5.37	54.678734	18.342915	54.678813	18.346460	54.676754	18.348094	54.677199	18.343460
Stanisłw Selke	7	12	12_66_w2	86/18/892	12_66	2018-03-26	2018-05-16	Triamiphos	mg/kg	0.075	p.0,075			1	Eurofins	SFBA0-7	5.37	54.678734	18.342915	54.678813	18.346460	54.676754	18.348094	54.677199	18.343460
Stanisłw Selke	7	12	12_66_w2	86/18/892	12_66	2018-03-26	2018-05-16	Triazofos	mg/kg	0.06	p.0,06			1	Eurofins	SFBA0-7	5.37	54.678734	18.342915	54.678813	18.346460	54.676754	18.348094	54.677199	18.343460
Stanisłw Selke	7	12	12_66_w2	86/18/892	12_66	2018-03-26	2018-05-16	Tribufos	mg/kg	0.03	p.0,03			1	Eurofins	SFBA0-7	5.37	54.678734	18.342915	54.678813	18.346460	54.676754	18.348094	54.677199	18.343460
Stanisłw Selke	7	12	12_66_w2	86/18/892	12_66	2018-03-26	2018-05-16	Trichloronat	mg/kg	0.015	p.0,015			1	Eurofins	SFBA0-7	5.37	54.678734	18.342915	54.678813	18.346460	54.676754	18.348094	54.677199	18.343460
Stanisłw Selke	7	12	12_66_w2	86/18/892	12_66	2018-03-26	2018-05-16	Tridiphane	mg/kg	0.15	p.0,15			1	Eurofins	SFBA0-7	5.37	54.678734	18.342915	54.678813	18.346460	54.676754	18.348094	54.677199	18.343460
Stanisłw Selke	7	12	12_66_w2	86/18/892	12_66	2018-03-26	2018-05-16	Trifloksystrobina	mg/kg	0.03	p.0,03			1	Eurofins	SFBA0-7	5.37	54.678734	18.342915	54.678813	18.346460	54.676754	18.348094	54.677199	18.343460
Stanisłw Selke	7	12	12_66_w2	86/18/892	12_66	2018-03-26	2018-05-16	Trifluralina	mg/kg	0.015	p.0,015			1	Eurofins	SFBA0-7	5.37	54.678734	18.342915	54.678813	18.346460	54.676754	18.348094	54.677199	18.343460
Stanisłw Selke	7	12	12_66_w2	86/18/892	12_66	2018-03-26	2018-05-16	Vamidothion	mg/kg	0.03	p.0,03			1	Eurofins	SFBA0-7	5.37	54.678734	18.342915	54.678813	18.346460	54.676754	18.348094	54.677199	18.343460
Stanisłw Selke	7	12	12_66_w2	86/18/892	12_66	2018-03-26	2018-05-16	Winklozolina	mg/kg	0.015	p.0,015			1	Eurofins	SFBA0-7	5.37	54.678734	18.342915	54.678813	18.346460	54.676754	18.348094	54.677199	18.343460
Stanisłw Selke	7	12	12_66_w2	86/18/892	12_66	2018-03-26	2018-05-16	Glifosat	mg/kg	0.05	p.0,05			1	Eurofins	SF130-4	5.37	54.678734	18.342915	54.678813	18.346460	54.676754	18.348094	54.677199	18.343460
Stanisłw Selke	7	12	12_66_w2	86/18/892	12_66	2018-03-26	2018-05-16	Glufosynat	mg/kg	0.05	p.0.05			1	Eurofins	SF130-4	5.37	54.678734	18.342915	54.678813	18.346460	54.676754	18.348094	54.677199	18.343460
Stanisłw Selke	7	12	12_66_w2	86/18/892	12_66	2018-03-26	2018-05-16	Kwas aminometylofosfonowy (AMPA)	mg/kg	0.05	0.15	±	0.075	0	Eurofins	SF130-4	5.37	54.678734	18.342915	54.678813	18.346460	54.676754	18.348094	54.677199	18.343460
Robert Klawikowski	9	5	5_351_w2	86/18/906	5_351	2018-03-27	2018-05-16	2,4,5-T-Methylester	mg/kg	0.03	p.0,03			1	Eurofins	SFBA0-7	0.86	54.639276	18.452665	54.638477	18.456252	54.638217	18.456096	54.639017	18.452433
Robert Klawikowski	9	5	5_351_w2	86/18/906	5_351	2018-03-27	2018-05-16	2,4-D-Methylester	mg/kg	0.03	p.0,03			1	Eurofins	SFBA0-7	0.86	54.639276	18.452665	54.638477	18.456252	54.638217	18.456096	54.639017	18.452433
Robert Klawikowski	9	5	5_351_w2	86/18/906	5_351	2018-03-27	2018-05-16	Acetochlor	mg/kg	0.15	p.0,15			1	Eurofins	SFBA0-7	0.86	54.639276	18.452665	54.638477	18.456252	54.638217	18.456096	54.639017	18.452433
Robert Klawikowski	9	5	5_351_w2	86/18/906	5_351	2018-03-27	2018-05-16	Aclonifen	mg/kg	0.06	p.0,06			1	Eurofins	SFBA0-7	0.86	54.639276	18.452665	54.638477	18.456252	54.638217	18.456096	54.639017	18.452433
Robert Klawikowski	9	5	5_351_w2	86/18/906	5_351	2018-03-27	2018-05-16	Akrynatryna	mg/kg	0.03	p.0,03			1	Eurofins	SFBA0-7	0.86	54.639276	18.452665	54.638477	18.456252	54.638217	18.456096	54.639017	18.452433
Robert Klawikowski	9	5	5_351_w2	86/18/906	5_351	2018-03-27	2018-05-16	Alachlor	mg/kg	0.03	p.0,03			1	Eurofins	SFBA0-7	0.86	54.639276	18.452665	54.638477	18.456252	54.638217	18.456096	54.639017	18.452433
Robert Klawikowski	9	5	5_351_w2	86/18/906	5_351	2018-03-27	2018-05-16	Aldryna	mg/kg	0.015	p.0,015			1	Eurofins	SFBA0-7	0.86	54.639276	18.452665	54.638477	18.456252	54.638217	18.456096	54.639017	18.452433
Robert Klawikowski	9	5	5_351_w2	86/18/906	5_351	2018-03-27	2018-05-16	Aldryna+Dieldryna	mg/kg	0.015	p.0,015			1	Eurofins	SFBA0-7	0.86	54.639276	18.452665	54.638477	18.456252	54.638217	18.456096	54.639017	18.452433
Robert Klawikowski	9	5	5_351_w2	86/18/906	5_351	2018-03-27	2018-05-16	Alletryna	mg/kg	0.03	p.0,03			1	Eurofins	SFBA0-7	0.86	54.639276	18.452665	54.638477	18.456252	54.638217	18.456096	54.639017	18.452433
Robert Klawikowski	9	5	5_351_w2	86/18/906	5_351	2018-03-27	2018-05-16	Amidithion	mg/kg	0.03	p.0,03			1	Eurofins	SFBA0-7	0.86	54.639276	18.452665	54.638477	18.456252	54.638217	18.456096	54.639017	18.452433
Robert Klawikowski	9	5	5_351_w2	86/18/906	5_351	2018-03-27	2018-05-16	Antrachinon	mg/kg	0.06	p.0,06			1	Eurofins	SFBA0-7	0.86	54.639276	18.452665	54.638477	18.456252	54.638217	18.456096	54.639017	18.452433
Robert Klawikowski	9	5	5_351_w2	86/18/906	5_351	2018-03-27	2018-05-16	Atrazyna	mg/kg	0.15	p.0,15			1	Eurofins	SFBA0-7	0.86	54.639276	18.452665	54.638477	18.456252	54.638217	18.456096	54.639017	18.452433
Robert Klawikowski	9	5	5_351_w2	86/18/906	5_351	2018-03-27	2018-05-16	Azakonazol	mg/kg	0.03	p.0,03			1	Eurofins	SFBA0-7	0.86	54.639276	18.452665	54.638477	18.456252	54.638217	18.456096	54.639017	18.452433
Robert Klawikowski	9	5	5_351_w2	86/18/906	5_351	2018-03-27	2018-05-16	Azynofos etylowy	mg/kg	0.03	p.0,03			1	Eurofins	SFBA0-7	0.86	54.639276	18.452665	54.638477	18.456252	54.638217	18.456096	54.639017	18.452433
Robert Klawikowski	9	5	5_351_w2	86/18/906	5_351	2018-03-27	2018-05-16	Azynofos metylowy	mg/kg	0.03	p.0,03			1	Eurofins	SFBA0-7	0.86	54.639276	18.452665	54.638477	18.456252	54.638217	18.456096	54.639017	18.452433
Robert Klawikowski	9	5	5_351_w2	86/18/906	5_351	2018-03-27	2018-05-16	Azoksystrobina	mg/kg	0.03	p.0,03			1	Eurofins	SFBA0-7	0.86	54.639276	18.452665	54.638477	18.456252	54.638217	18.456096	54.639017	18.452433
Robert Klawikowski	9	5	5_351_w2	86/18/906	5_351	2018-03-27	2018-05-16	Benfluralin	mg/kg	0.015	p.0,015			1	Eurofins	SFBA0-7	0.86	54.639276	18.452665	54.638477	18.456252	54.638217	18.456096	54.639017	18.452433
Robert Klawikowski	9	5	5_351_w2	86/18/906	5_351	2018-03-27	2018-05-16	Benoxacor	mg/kg	0.03	p.0,03			1	Eurofins	SFBA0-7	0.86	54.639276	18.452665	54.638477	18.456252	54.638217	18.456096	54.639017	18.452433
Robert Klawikowski	9	5	5_351_w2	86/18/906	5_351	2018-03-27	2018-05-16	Benzoylprop-ethyl	mg/kg	0.15	p.0,15			1	Eurofins	SFBA0-7	0.86	54.639276	18.452665	54.638477	18.456252	54.638217	18.456096	54.639017	18.452433
Robert Klawikowski	9	5	5_351_w2	86/18/906	5_351	2018-03-27	2018-05-16	Biofenox	mg/kg	0.03	p.0,03			1	Eurofins	SFBA0-7	0.86	54.639276	18.452665	54.638477	18.456252	54.638217	18.456096	54.639017	18.452433
Robert Klawikowski	9	5	5_351_w2	86/18/906	5_351	2018-03-27	2018-05-16	Binapacryl	mg/kg	0.015	p.0,015			1	Eurofins	SFBA0-7	0.86	54.639276	18.452665	54.638477	18.456252	54.638217	18.456096	54.639017	18.452433
Robert Klawikowski	9	5	5_351_w2	86/18/906	5_351	2018-03-27	2018-05-16	Bifentryna	mg/kg	0.06	p.0,06			1	Eurofins	SFBA0-7	0.86	54.639276	18.452665	54.638477	18.456252	54.638217	18.456096	54.639017	18.452433
Robert Klawikowski	9	5	5_351_w2	86/18/906	5_351	2018-03-27	2018-05-16	Bitertanol	mg/kg	0.15	p.0,15			1	Eurofins	SFBA0-7	0.86	54.639276	18.452665	54.638477	18.456252	54.638217	18.456096	54.639017	18.452433
Robert Klawikowski	9	5	5_351_w2	86/18/906	5_351	2018-03-27	2018-05-16	Boskalid	mg/kg	0.09	p.0,09			1	Eurofins	SFBA0-7	0.86	54.639276	18.452665	54.638477	18.456252	54.638217	18.456096	54.639017	18.452433
Robert Klawikowski	9	5	5_351_w2	86/18/906	5_351	2018-03-27	2018-05-16	Bromofenvinphos	mg/kg	0.03	p.0,03			1	Eurofins	SFBA0-7	0.86	54.639276	18.452665	54.638477	18.456252	54.638217	18.456096	54.639017	18.452433
Robert Klawikowski	9	5	5_351_w2	86/18/906	5_351	2018-03-27	2018-05-16	Bromocyclen	mg/kg	0.03	p.0,03			1	Eurofins	SFBA0-7	0.86	54.639276	18.452665	54.638477	18.456252	54.638217	18.456096	54.639017	18.452433
Robert Klawikowski	9	5	5_351_w2	86/18/906	5_351	2018-03-27	2018-05-16	Bromofos metylowy	mg/kg	0.015	p.0,015			1	Eurofins	SFBA0-7	0.86	54.639276	18.452665	54.638477	18.456252	54.638217	18.456096	54.639017	18.452433
Robert Klawikowski	9	5	5_351_w2	86/18/906	5_351	2018-03-27	2018-05-16	Bromofos etylowy	mg/kg	0.015	p.0,015			1	Eurofins	SFBA0-7	0.86	54.639276	18.452665	54.638477	18.456252	54.638217	18.456096	54.639017	18.452433
Robert Klawikowski	9	5	5_351_w2	86/18/906	5_351	2018-03-27	2018-05-16	Bromopropylat	mg/kg	0.03	p.0,03			1	Eurofins	SFBA0-7	0.86	54.639276	18.452665	54.638477	18.456252	54.638217	18.456096	54.639017	18.452433
Robert Klawikowski	9	5	5_351_w2	86/18/906	5_351	2018-03-27	2018-05-16	Buprofezyna	mg/kg	0.15	p.0,15			1	Eurofins	SFBA0-7	0.86	54.639276	18.452665	54.638477	18.456252	54.638217	18.456096	54.639017	18.452433
Robert Klawikowski	9	5	5_351_w2	86/18/906	5_351	2018-03-27	2018-05-16	Butachlor	mg/kg	0.03	p.0,03			1	Eurofins	SFBA0-7	0.86	54.639276	18.452665	54.638477	18.456252	54.638217	18.456096	54.639017	18.452433
Robert Klawikowski	9	5	5_351_w2	86/18/906	5_351	2018-03-27	2018-05-16	Butamifos	mg/kg	0.015	p.0,015			1	Eurofins	SFBA0-7	0.86	54.639276	18.452665	54.638477	18.456252	54.638217	18.456096	54.639017	18.452433
Robert Klawikowski	9	5	5_351_w2	86/18/906	5_351	2018-03-27	2018-05-16	Butralin	mg/kg	0.03	p.0,03			1	Eurofins	SFBA0-7	0.86	54.639276	18.452665	54.638477	18.456252	54.638217	18.456096	54.639017	18.452433
Robert Klawikowski	9	5	5_351_w2	86/18/906	5_351	2018-03-27	2018-05-16	Kadusafos	mg/kg	0.03	p.0,03			1	Eurofins	SFBA0-7	0.86	54.639276	18.452665	54.638477	18.456252	54.638217	18.456096	54.639017	18.452433
Robert Klawikowski	9	5	5_351_w2	86/18/906	5_351	2018-03-27	2018-05-16	Kaptafol	mg/kg	0.03	p.0,03			1	Eurofins	SFBA0-7	0.86	54.639276	18.452665	54.638477	18.456252	54.638217	18.456096	54.639017	18.452433
Robert Klawikowski	9	5	5_351_w2	86/18/906	5_351	2018-03-27	2018-05-16	Kaptan	mg/kg	0.03	p.0,03			1	Eurofins	SFBA0-7	0.86	54.639276	18.452665	54.638477	18.456252	54.638217	18.456096	54.639017	18.452433
Robert Klawikowski	9	5	5_351_w2	86/18/906	5_351	2018-03-27	2018-05-16	Karbofenotion	mg/kg	0.015	p.0,015			1	Eurofins	SFBA0-7	0.86	54.639276	18.452665	54.638477	18.456252	54.638217	18.456096	54.639017	18.452433
Robert Klawikowski	9	5	5_351_w2	86/18/906	5_351	2018-03-27	2018-05-16	Carbophenothion-methyl	mg/kg	0.03	p.0,03			1	Eurofins	SFBA0-7	0.86	54.639276	18.452665	54.638477	18.456252	54.638217	18.456096	54.639017	18.452433
Robert Klawikowski	9	5	5_351_w2	86/18/906	5_351	2018-03-27	2018-05-16	Carfentrazone-ethyl	mg/kg	0.03	p.0,03			1	Eurofins	SFBA0-7	0.86	54.639276	18.452665	54.638477	18.456252	54.638217	18.456096	54.639017	18.452433
Robert Klawikowski	9	5	5_351_w2	86/18/906	5_351	2018-03-27	2018-05-16	Chinometionat	mg/kg	0.015	p.0,015			1	Eurofins	SFBA0-7	0.86	54.639276	18.452665	54.638477	18.456252	54.638217	18.456096	54.639017	18.452433
Robert Klawikowski	9	5	5_351_w2	86/18/906	5_351	2018-03-27	2018-05-16	Chlorbenzyd	mg/kg	0.015	p.0,015			1	Eurofins	SFBA0-7	0.86	54.639276	18.452665	54.638477	18.456252	54.638217	18.456096	54.639017	18.452433
Robert Klawikowski	9	5	5_351_w2	86/18/906	5_351	2018-03-27	2018-05-16	Chlordane (total)	mg/kg	0.03	p.0,03			1	Eurofins	SFBA0-7	0.86	54.639276	18.452665	54.638477	18.456252	54.638217	18.456096	54.639017	18.452433
Robert Klawikowski	9	5	5_351_w2	86/18/906	5_351	2018-03-27	2018-05-16	Chlordan,cis-	mg/kg	0.015	p.0,015			1	Eurofins	SFBA0-7	0.86	54.639276	18.452665	54.638477	18.456252	54.638217	18.456096	54.639017	18.452433
Robert Klawikowski	9	5	5_351_w2	86/18/906	5_351	2018-03-27	2018-05-16	Chlordan,oxy-	mg/kg	0.03	p.0,03			1	Eurofins	SFBA0-7	0.86	54.639276	18.452665	54.638477	18.456252	54.638217	18.456096	54.639017	18.452433
Robert Klawikowski	9	5	5_351_w2	86/18/906	5_351	2018-03-27	2018-05-16	Chlordan,gamma/trans-	mg/kg	0.015	p.0,015			1	Eurofins	SFBA0-7	0.86	54.639276	18.452665	54.638477	18.456252	54.638217	18.456096	54.639017	18.452433
Robert Klawikowski	9	5	5_351_w2	86/18/906	5_351	2018-03-27	2018-05-16	Chlordecon	mg/kg	0.03	p.0,03			1	Eurofins	SFBA0-7	0.86	54.639276	18.452665	54.638477	18.456252	54.638217	18.456096	54.639017	18.452433
Robert Klawikowski	9	5	5_351_w2	86/18/906	5_351	2018-03-27	2018-05-16	Chlorethoksyfos	mg/kg	0.015	p.0,015			1	Eurofins	SFBA0-7	0.86	54.639276	18.452665	54.638477	18.456252	54.638217	18.456096	54.639017	18.452433
Robert Klawikowski	9	5	5_351_w2	86/18/906	5_351	2018-03-27	2018-05-16	Chlorfenapyr	mg/kg	0.015	p.0,015			1	Eurofins	SFBA0-7	0.86	54.639276	18.452665	54.638477	18.456252	54.638217	18.456096	54.639017	18.452433
Robert Klawikowski	9	5	5_351_w2	86/18/906	5_351	2018-03-27	2018-05-16	Chlorfenprop-methyl	mg/kg	0.03	p.0,03			1	Eurofins	SFBA0-7	0.86	54.639276	18.452665	54.638477	18.456252	54.638217	18.456096	54.639017	18.452433
Robert Klawikowski	9	5	5_351_w2	86/18/906	5_351	2018-03-27	2018-05-16	Chlorfenson	mg/kg	0.015	p.0,015			1	Eurofins	SFBA0-7	0.86	54.639276	18.452665	54.638477	18.456252	54.638217	18.456096	54.639017	18.452433
Robert Klawikowski	9	5	5_351_w2	86/18/906	5_351	2018-03-27	2018-05-16	Chlorfenwinfos	mg/kg	0.03	p.0,03			1	Eurofins	SFBA0-7	0.86	54.639276	18.452665	54.638477	18.456252	54.638217	18.456096	54.639017	18.452433
Robert Klawikowski	9	5	5_351_w2	86/18/906	5_351	2018-03-27	2018-05-16	Chloridazon	mg/kg	0.03	p.0,03			1	Eurofins	SFBA0-7	0.86	54.639276	18.452665	54.638477	18.456252	54.638217	18.456096	54.639017	18.452433
Robert Klawikowski	9	5	5_351_w2	86/18/906	5_351	2018-03-27	2018-05-16	Chlormephos	mg/kg	0.015	p.0,015			1	Eurofins	SFBA0-7	0.86	54.639276	18.452665	54.638477	18.456252	54.638217	18.456096	54.639017	18.452433
Robert Klawikowski	9	5	5_351_w2	86/18/906	5_351	2018-03-27	2018-05-16	Chlorobenzylat	mg/kg	0.015	p.0,015			1	Eurofins	SFBA0-7	0.86	54.639276	18.452665	54.638477	18.456252	54.638217	18.456096	54.639017	18.452433
Robert Klawikowski	9	5	5_351_w2	86/18/906	5_351	2018-03-27	2018-05-16	Chloroneb	mg/kg	0.03	p.0,03			1	Eurofins	SFBA0-7	0.86	54.639276	18.452665	54.638477	18.456252	54.638217	18.456096	54.639017	18.452433
Robert Klawikowski	9	5	5_351_w2	86/18/906	5_351	2018-03-27	2018-05-16	Chloropropylat	mg/kg	0.015	p.0,015			1	Eurofins	SFBA0-7	0.86	54.639276	18.452665	54.638477	18.456252	54.638217	18.456096	54.639017	18.452433
Robert Klawikowski	9	5	5_351_w2	86/18/906	5_351	2018-03-27	2018-05-16	Chlorotalonil	mg/kg	0.015	p.0,015			1	Eurofins	SFBA0-7	0.86	54.639276	18.452665	54.638477	18.456252	54.638217	18.456096	54.639017	18.452433
Robert Klawikowski	9	5	5_351_w2	86/18/906	5_351	2018-03-27	2018-05-16	Chlorpiryfos etylowy	mg/kg	0.015	p.0,015			1	Eurofins	SFBA0-7	0.86	54.639276	18.452665	54.638477	18.456252	54.638217	18.456096	54.639017	18.452433
Robert Klawikowski	9	5	5_351_w2	86/18/906	5_351	2018-03-27	2018-05-16	Chlorpiryfos metylowy	mg/kg	0.015	p.0,015			1	Eurofins	SFBA0-7	0.86	54.639276	18.452665	54.638477	18.456252	54.638217	18.456096	54.639017	18.452433
Robert Klawikowski	9	5	5_351_w2	86/18/906	5_351	2018-03-27	2018-05-16	Chlorthal-dimethyl	mg/kg	0.015	p.0,015			1	Eurofins	SFBA0-7	0.86	54.639276	18.452665	54.638477	18.456252	54.638217	18.456096	54.639017	18.452433
Robert Klawikowski	9	5	5_351_w2	86/18/906	5_351	2018-03-27	2018-05-16	Chlorotion	mg/kg	0.03	p.0,03			1	Eurofins	SFBA0-7	0.86	54.639276	18.452665	54.638477	18.456252	54.638217	18.456096	54.639017	18.452433
Robert Klawikowski	9	5	5_351_w2	86/18/906	5_351	2018-03-27	2018-05-16	Chlortiofos	mg/kg	0.015	p.0,015			1	Eurofins	SFBA0-7	0.86	54.639276	18.452665	54.638477	18.456252	54.638217	18.456096	54.639017	18.452433
Robert Klawikowski	9	5	5_351_w2	86/18/906	5_351	2018-03-27	2018-05-16	Chlozolinate	mg/kg	0.03	p.0,03			1	Eurofins	SFBA0-7	0.86	54.639276	18.452665	54.638477	18.456252	54.638217	18.456096	54.639017	18.452433
Robert Klawikowski	9	5	5_351_w2	86/18/906	5_351	2018-03-27	2018-05-16	Cinidon-ethyl	mg/kg	0.03	p.0,03			1	Eurofins	SFBA0-7	0.86	54.639276	18.452665	54.638477	18.456252	54.638217	18.456096	54.639017	18.452433
Robert Klawikowski	9	5	5_351_w2	86/18/906	5_351	2018-03-27	2018-05-16	Clodinafop-propargyl	mg/kg	0.09	p.0,09			1	Eurofins	SFBA0-7	0.86	54.639276	18.452665	54.638477	18.456252	54.638217	18.456096	54.639017	18.452433
Robert Klawikowski	9	5	5_351_w2	86/18/906	5_351	2018-03-27	2018-05-16	Kumafos	mg/kg	0.015	p.0,015			1	Eurofins	SFBA0-7	0.86	54.639276	18.452665	54.638477	18.456252	54.638217	18.456096	54.639017	18.452433
Robert Klawikowski	9	5	5_351_w2	86/18/906	5_351	2018-03-27	2018-05-16	Crotoxyphos	mg/kg	0.03	p.0,03			1	Eurofins	SFBA0-7	0.86	54.639276	18.452665	54.638477	18.456252	54.638217	18.456096	54.639017	18.452433
Robert Klawikowski	9	5	5_351_w2	86/18/906	5_351	2018-03-27	2018-05-16	Cyjanofenfos	mg/kg	0.03	p.0,03			1	Eurofins	SFBA0-7	0.86	54.639276	18.452665	54.638477	18.456252	54.638217	18.456096	54.639017	18.452433
Robert Klawikowski	9	5	5_351_w2	86/18/906	5_351	2018-03-27	2018-05-16	Cyanophos	mg/kg	0.03	p.0,03			1	Eurofins	SFBA0-7	0.86	54.639276	18.452665	54.638477	18.456252	54.638217	18.456096	54.639017	18.452433
Robert Klawikowski	9	5	5_351_w2	86/18/906	5_351	2018-03-27	2018-05-16	Cyflutryna	mg/kg	0.03	p.0,03			1	Eurofins	SFBA0-7	0.86	54.639276	18.452665	54.638477	18.456252	54.638217	18.456096	54.639017	18.452433
Robert Klawikowski	9	5	5_351_w2	86/18/906	5_351	2018-03-27	2018-05-16	lambda-Cyhalotryna	mg/kg	0.03	p.0,03			1	Eurofins	SFBA0-7	0.86	54.639276	18.452665	54.638477	18.456252	54.638217	18.456096	54.639017	18.452433
Robert Klawikowski	9	5	5_351_w2	86/18/906	5_351	2018-03-27	2018-05-16	Cypermetryna	mg/kg	0.015	p.0,015			1	Eurofins	SFBA0-7	0.86	54.639276	18.452665	54.638477	18.456252	54.638217	18.456096	54.639017	18.452433
Robert Klawikowski	9	5	5_351_w2	86/18/906	5_351	2018-03-27	2018-05-16	Cyphenothrin	mg/kg	0.03	p.0,03			1	Eurofins	SFBA0-7	0.86	54.639276	18.452665	54.638477	18.456252	54.638217	18.456096	54.639017	18.452433
Robert Klawikowski	9	5	5_351_w2	86/18/906	5_351	2018-03-27	2018-05-16	Cyprokonazol	mg/kg	0.12	p.0,12			1	Eurofins	SFBA0-7	0.86	54.639276	18.452665	54.638477	18.456252	54.638217	18.456096	54.639017	18.452433
Robert Klawikowski	9	5	5_351_w2	86/18/906	5_351	2018-03-27	2018-05-16	DDD-o,p	mg/kg	0.015	p.0,015			1	Eurofins	SFBA0-7	0.86	54.639276	18.452665	54.638477	18.456252	54.638217	18.456096	54.639017	18.452433
Robert Klawikowski	9	5	5_351_w2	86/18/906	5_351	2018-03-27	2018-05-16	DDE-o,p	mg/kg	0.015	p.0,015			1	Eurofins	SFBA0-7	0.86	54.639276	18.452665	54.638477	18.456252	54.638217	18.456096	54.639017	18.452433
Robert Klawikowski	9	5	5_351_w2	86/18/906	5_351	2018-03-27	2018-05-16	DDT(p,p'-DDT+o,p'-DDT+p.p'-DDE+p,p'-TDE)	mg/kg	0.015	p.0,015			1	Eurofins	SFBA0-7	0.86	54.639276	18.452665	54.638477	18.456252	54.638217	18.456096	54.639017	18.452433
Robert Klawikowski	9	5	5_351_w2	86/18/906	5_351	2018-03-27	2018-05-16	Deltametryna	mg/kg	0.015	p.0,015			1	Eurofins	SFBA0-7	0.86	54.639276	18.452665	54.638477	18.456252	54.638217	18.456096	54.639017	18.452433
Robert Klawikowski	9	5	5_351_w2	86/18/906	5_351	2018-03-27	2018-05-16	Dialifos	mg/kg	0.03	p.0,03			1	Eurofins	SFBA0-7	0.86	54.639276	18.452665	54.638477	18.456252	54.638217	18.456096	54.639017	18.452433
Robert Klawikowski	9	5	5_351_w2	86/18/906	5_351	2018-03-27	2018-05-16	Di-allate	mg/kg	0.03	p.0,03			1	Eurofins	SFBA0-7	0.86	54.639276	18.452665	54.638477	18.456252	54.638217	18.456096	54.639017	18.452433
Robert Klawikowski	9	5	5_351_w2	86/18/906	5_351	2018-03-27	2018-05-16	Diazynon	mg/kg	0.03	p.0,03			1	Eurofins	SFBA0-7	0.86	54.639276	18.452665	54.638477	18.456252	54.638217	18.456096	54.639017	18.452433
Robert Klawikowski	9	5	5_351_w2	86/18/906	5_351	2018-03-27	2018-05-16	4,4-Dibromobenzophenone	mg/kg	0.03	p.0,03			1	Eurofins	SFBA0-7	0.86	54.639276	18.452665	54.638477	18.456252	54.638217	18.456096	54.639017	18.452433
Robert Klawikowski	9	5	5_351_w2	86/18/906	5_351	2018-03-27	2018-05-16	Dicapthon	mg/kg	0.03	p.0,03			1	Eurofins	SFBA0-7	0.86	54.639276	18.452665	54.638477	18.456252	54.638217	18.456096	54.639017	18.452433
Robert Klawikowski	9	5	5_351_w2	86/18/906	5_351	2018-03-27	2018-05-16	Dichlobenil	mg/kg	0.15	p.0,15			1	Eurofins	SFBA0-7	0.86	54.639276	18.452665	54.638477	18.456252	54.638217	18.456096	54.639017	18.452433
Robert Klawikowski	9	5	5_351_w2	86/18/906	5_351	2018-03-27	2018-05-16	Dichlofention	mg/kg	0.03	p.0,03			1	Eurofins	SFBA0-7	0.86	54.639276	18.452665	54.638477	18.456252	54.638217	18.456096	54.639017	18.452433
Robert Klawikowski	9	5	5_351_w2	86/18/906	5_351	2018-03-27	2018-05-16	Dichlofluanid	mg/kg	0.015	p.0,015			1	Eurofins	SFBA0-7	0.86	54.639276	18.452665	54.638477	18.456252	54.638217	18.456096	54.639017	18.452433
Robert Klawikowski	9	5	5_351_w2	86/18/906	5_351	2018-03-27	2018-05-16	Dichloran	mg/kg	0.075	p.0,075			1	Eurofins	SFBA0-7	0.86	54.639276	18.452665	54.638477	18.456252	54.638217	18.456096	54.639017	18.452433
Robert Klawikowski	9	5	5_351_w2	86/18/906	5_351	2018-03-27	2018-05-16	Dichlorfos	mg/kg	0.06	p.0,06			1	Eurofins	SFBA0-7	0.86	54.639276	18.452665	54.638477	18.456252	54.638217	18.456096	54.639017	18.452433
Robert Klawikowski	9	5	5_351_w2	86/18/906	5_351	2018-03-27	2018-05-16	Diclofop-methyl	mg/kg	0.015	p.0,015			1	Eurofins	SFBA0-7	0.86	54.639276	18.452665	54.638477	18.456252	54.638217	18.456096	54.639017	18.452433
Robert Klawikowski	9	5	5_351_w2	86/18/906	5_351	2018-03-27	2018-05-16	Dikofol (suma)	mg/kg	0.015	p.0,015			1	Eurofins	SFBA0-7	0.86	54.639276	18.452665	54.638477	18.456252	54.638217	18.456096	54.639017	18.452433
Robert Klawikowski	9	5	5_351_w2	86/18/906	5_351	2018-03-27	2018-05-16	Dicofol,o,p-	mg/kg	0.015	p.0,015			1	Eurofins	SFBA0-7	0.86	54.639276	18.452665	54.638477	18.456252	54.638217	18.456096	54.639017	18.452433
Robert Klawikowski	9	5	5_351_w2	86/18/906	5_351	2018-03-27	2018-05-16	Dicofol,p,p--	mg/kg	0.015	p.0,015			1	Eurofins	SFBA0-7	0.86	54.639276	18.452665	54.638477	18.456252	54.638217	18.456096	54.639017	18.452433
Robert Klawikowski	9	5	5_351_w2	86/18/906	5_351	2018-03-27	2018-05-16	Dicrotophos	mg/kg	0.03	p.0,03			1	Eurofins	SFBA0-7	0.86	54.639276	18.452665	54.638477	18.456252	54.638217	18.456096	54.639017	18.452433
Robert Klawikowski	9	5	5_351_w2	86/18/906	5_351	2018-03-27	2018-05-16	Dieldryna	mg/kg	0.015	p.0,015			1	Eurofins	SFBA0-7	0.86	54.639276	18.452665	54.638477	18.456252	54.638217	18.456096	54.639017	18.452433
Robert Klawikowski	9	5	5_351_w2	86/18/906	5_351	2018-03-27	2018-05-16	Dienochlor	mg/kg	0.03	p.0,03			1	Eurofins	SFBA0-7	0.86	54.639276	18.452665	54.638477	18.456252	54.638217	18.456096	54.639017	18.452433
Robert Klawikowski	9	5	5_351_w2	86/18/906	5_351	2018-03-27	2018-05-16	Difenokonazol	mg/kg	0.045	p.0,045			1	Eurofins	SFBA0-7	0.86	54.639276	18.452665	54.638477	18.456252	54.638217	18.456096	54.639017	18.452433
Robert Klawikowski	9	5	5_351_w2	86/18/906	5_351	2018-03-27	2018-05-16	Diflufenican	mg/kg	0.03	p.0,03			1	Eurofins	SFBA0-7	0.86	54.639276	18.452665	54.638477	18.456252	54.638217	18.456096	54.639017	18.452433
Robert Klawikowski	9	5	5_351_w2	86/18/906	5_351	2018-03-27	2018-05-16	Dimefox	mg/kg	0.15	p.0,15			1	Eurofins	SFBA0-7	0.86	54.639276	18.452665	54.638477	18.456252	54.638217	18.456096	54.639017	18.452433
Robert Klawikowski	9	5	5_351_w2	86/18/906	5_351	2018-03-27	2018-05-16	Dimetrachlor	mg/kg	0.03	p.0,03			1	Eurofins	SFBA0-7	0.86	54.639276	18.452665	54.638477	18.456252	54.638217	18.456096	54.639017	18.452433
Robert Klawikowski	9	5	5_351_w2	86/18/906	5_351	2018-03-27	2018-05-16	Dimethipine	mg/kg	0.03	p.0,03			1	Eurofins	SFBA0-7	0.86	54.639276	18.452665	54.638477	18.456252	54.638217	18.456096	54.639017	18.452433
Robert Klawikowski	9	5	5_351_w2	86/18/906	5_351	2018-03-27	2018-05-16	Dimetoat	mg/kg	0.06	p.0,06			1	Eurofins	SFBA0-7	0.86	54.639276	18.452665	54.638477	18.456252	54.638217	18.456096	54.639017	18.452433
Robert Klawikowski	9	5	5_351_w2	86/18/906	5_351	2018-03-27	2018-05-16	Dimetomorf	mg/kg	0.03	p.0,03			1	Eurofins	SFBA0-7	0.86	54.639276	18.452665	54.638477	18.456252	54.638217	18.456096	54.639017	18.452433
Robert Klawikowski	9	5	5_351_w2	86/18/906	5_351	2018-03-27	2018-05-16	Dinikonazol	mg/kg	0.03	p.0,03			1	Eurofins	SFBA0-7	0.86	54.639276	18.452665	54.638477	18.456252	54.638217	18.456096	54.639017	18.452433
Robert Klawikowski	9	5	5_351_w2	86/18/906	5_351	2018-03-27	2018-05-16	Dinitramine	mg/kg	0.03	p.0,03			1	Eurofins	SFBA0-7	0.86	54.639276	18.452665	54.638477	18.456252	54.638217	18.456096	54.639017	18.452433
Robert Klawikowski	9	5	5_351_w2	86/18/906	5_351	2018-03-27	2018-05-16	Dinobuton	mg/kg	0.1	p.0,1			1	Eurofins	SFBA0-7	0.86	54.639276	18.452665	54.638477	18.456252	54.638217	18.456096	54.639017	18.452433
Robert Klawikowski	9	5	5_351_w2	86/18/906	5_351	2018-03-27	2018-05-16	Disulfoton	mg/kg	0.03	p.0,03			1	Eurofins	SFBA0-7	0.86	54.639276	18.452665	54.638477	18.456252	54.638217	18.456096	54.639017	18.452433
Robert Klawikowski	9	5	5_351_w2	86/18/906	5_351	2018-03-27	2018-05-16	Disulfoton-sulfon	mg/kg	0.03	p.0,03			1	Eurofins	SFBA0-7	0.86	54.639276	18.452665	54.638477	18.456252	54.638217	18.456096	54.639017	18.452433
Robert Klawikowski	9	5	5_351_w2	86/18/906	5_351	2018-03-27	2018-05-16	Ditalimfos	mg/kg	0.015	p.0,015			1	Eurofins	SFBA0-7	0.86	54.639276	18.452665	54.638477	18.456252	54.638217	18.456096	54.639017	18.452433
Robert Klawikowski	9	5	5_351_w2	86/18/906	5_351	2018-03-27	2018-05-16	Edifenphos	mg/kg	0.03	p.0,03			1	Eurofins	SFBA0-7	0.86	54.639276	18.452665	54.638477	18.456252	54.638217	18.456096	54.639017	18.452433
Robert Klawikowski	9	5	5_351_w2	86/18/906	5_351	2018-03-27	2018-05-16	Endosulfan (suma izomerów)	mg/kg	0.015	p.0,015			1	Eurofins	SFBA0-7	0.86	54.639276	18.452665	54.638477	18.456252	54.638217	18.456096	54.639017	18.452433
Robert Klawikowski	9	5	5_351_w2	86/18/906	5_351	2018-03-27	2018-05-16	alfa-Endosulfan	mg/kg	0.015	p.0,015			1	Eurofins	SFBA0-7	0.86	54.639276	18.452665	54.638477	18.456252	54.638217	18.456096	54.639017	18.452433
Robert Klawikowski	9	5	5_351_w2	86/18/906	5_351	2018-03-27	2018-05-16	Siarczan endosulfanu	mg/kg	0.015	p.0,015			1	Eurofins	SFBA0-7	0.86	54.639276	18.452665	54.638477	18.456252	54.638217	18.456096	54.639017	18.452433
Robert Klawikowski	9	5	5_351_w2	86/18/906	5_351	2018-03-27	2018-05-16	beta-Endosulfan	mg/kg	0.015	p.0,015			1	Eurofins	SFBA0-7	0.86	54.639276	18.452665	54.638477	18.456252	54.638217	18.456096	54.639017	18.452433
Robert Klawikowski	9	5	5_351_w2	86/18/906	5_351	2018-03-27	2018-05-16	Endryna	mg/kg	0.015	p.0,015			1	Eurofins	SFBA0-7	0.86	54.639276	18.452665	54.638477	18.456252	54.638217	18.456096	54.639017	18.452433
Robert Klawikowski	9	5	5_351_w2	86/18/906	5_351	2018-03-27	2018-05-16	Ketoendrin-delta	mg/kg	0.015	p.0,015			1	Eurofins	SFBA0-7	0.86	54.639276	18.452665	54.638477	18.456252	54.638217	18.456096	54.639017	18.452433
Robert Klawikowski	9	5	5_351_w2	86/18/906	5_351	2018-03-27	2018-05-16	EPN	mg/kg	0.03	p.0,03			1	Eurofins	SFBA0-7	0.86	54.639276	18.452665	54.638477	18.456252	54.638217	18.456096	54.639017	18.452433
Robert Klawikowski	9	5	5_351_w2	86/18/906	5_351	2018-03-27	2018-05-16	Epoksykonazol	mg/kg	0.12	p.0,12			1	Eurofins	SFBA0-7	0.86	54.639276	18.452665	54.638477	18.456252	54.638217	18.456096	54.639017	18.452433
Robert Klawikowski	9	5	5_351_w2	86/18/906	5_351	2018-03-27	2018-05-16	Etaconazole	mg/kg	0.06	p.0,06			1	Eurofins	SFBA0-7	0.86	54.639276	18.452665	54.638477	18.456252	54.638217	18.456096	54.639017	18.452433
Robert Klawikowski	9	5	5_351_w2	86/18/906	5_351	2018-03-27	2018-05-16	Ethalfluralin	mg/kg	0.03	p.0,03			1	Eurofins	SFBA0-7	0.86	54.639276	18.452665	54.638477	18.456252	54.638217	18.456096	54.639017	18.452433
Robert Klawikowski	9	5	5_351_w2	86/18/906	5_351	2018-03-27	2018-05-16	Etion	mg/kg	0.015	p.0,015			1	Eurofins	SFBA0-7	0.86	54.639276	18.452665	54.638477	18.456252	54.638217	18.456096	54.639017	18.452433
Robert Klawikowski	9	5	5_351_w2	86/18/906	5_351	2018-03-27	2018-05-16	Ethiprol	mg/kg	0.06	p.0,06			1	Eurofins	SFBA0-7	0.86	54.639276	18.452665	54.638477	18.456252	54.638217	18.456096	54.639017	18.452433
Robert Klawikowski	9	5	5_351_w2	86/18/906	5_351	2018-03-27	2018-05-16	Etofumesat	mg/kg	0.15	p.0,15			1	Eurofins	SFBA0-7	0.86	54.639276	18.452665	54.638477	18.456252	54.638217	18.456096	54.639017	18.452433
Robert Klawikowski	9	5	5_351_w2	86/18/906	5_351	2018-03-27	2018-05-16	Etoprofos	mg/kg	0.015	p.0,15			1	Eurofins	SFBA0-7	0.86	54.639276	18.452665	54.638477	18.456252	54.638217	18.456096	54.639017	18.452433
Robert Klawikowski	9	5	5_351_w2	86/18/906	5_351	2018-03-27	2018-05-16	Etridiazole	mg/kg	0.015	p.0,15			1	Eurofins	SFBA0-7	0.86	54.639276	18.452665	54.638477	18.456252	54.638217	18.456096	54.639017	18.452433
Robert Klawikowski	9	5	5_351_w2	86/18/906	5_351	2018-03-27	2018-05-16	Etrimfos	mg/kg	0.015	p.0,15			1	Eurofins	SFBA0-7	0.86	54.639276	18.452665	54.638477	18.456252	54.638217	18.456096	54.639017	18.452433
Robert Klawikowski	9	5	5_351_w2	86/18/906	5_351	2018-03-27	2018-05-16	Famophos	mg/kg	0.03	p.0,03			1	Eurofins	SFBA0-7	0.86	54.639276	18.452665	54.638477	18.456252	54.638217	18.456096	54.639017	18.452433
Robert Klawikowski	9	5	5_351_w2	86/18/906	5_351	2018-03-27	2018-05-16	Famoksadon	mg/kg	0.03	p.0,03			1	Eurofins	SFBA0-7	0.86	54.639276	18.452665	54.638477	18.456252	54.638217	18.456096	54.639017	18.452433
Robert Klawikowski	9	5	5_351_w2	86/18/906	5_351	2018-03-27	2018-05-16	Fenamidon	mg/kg	0.06	p.0,06			1	Eurofins	SFBA0-7	0.86	54.639276	18.452665	54.638477	18.456252	54.638217	18.456096	54.639017	18.452433
Robert Klawikowski	9	5	5_351_w2	86/18/906	5_351	2018-03-27	2018-05-16	Fenamifos (suma izomerów)	mg/kg	0.06	p.0,06			1	Eurofins	SFBA0-7	0.86	54.639276	18.452665	54.638477	18.456252	54.638217	18.456096	54.639017	18.452433
Robert Klawikowski	9	5	5_351_w2	86/18/906	5_351	2018-03-27	2018-05-16	Fenarimol	mg/kg	0.15	p.0,15			1	Eurofins	SFBA0-7	0.86	54.639276	18.452665	54.638477	18.456252	54.638217	18.456096	54.639017	18.452433
Robert Klawikowski	9	5	5_351_w2	86/18/906	5_351	2018-03-27	2018-05-16	Fenbukonazol	mg/kg	0.03	p.0,03			1	Eurofins	SFBA0-7	0.86	54.639276	18.452665	54.638477	18.456252	54.638217	18.456096	54.639017	18.452433
Robert Klawikowski	9	5	5_351_w2	86/18/906	5_351	2018-03-27	2018-05-16	Fenchlorazole	mg/kg	0.03	p.0,03			1	Eurofins	SFBA0-7	0.86	54.639276	18.452665	54.638477	18.456252	54.638217	18.456096	54.639017	18.452433
Robert Klawikowski	9	5	5_351_w2	86/18/906	5_351	2018-03-27	2018-05-16	Fenchlorofos	mg/kg	0.015	p.0,015			1	Eurofins	SFBA0-7	0.86	54.639276	18.452665	54.638477	18.456252	54.638217	18.456096	54.639017	18.452433
Robert Klawikowski	9	5	5_351_w2	86/18/906	5_351	2018-03-27	2018-05-16	Fenfluthrine	mg/kg	0.03	p.0,03			1	Eurofins	SFBA0-7	0.86	54.639276	18.452665	54.638477	18.456252	54.638217	18.456096	54.639017	18.452433
Robert Klawikowski	9	5	5_351_w2	86/18/906	5_351	2018-03-27	2018-05-16	Fenheksamid	mg/kg	0.15	p.0,15			1	Eurofins	SFBA0-7	0.86	54.639276	18.452665	54.638477	18.456252	54.638217	18.456096	54.639017	18.452433
Robert Klawikowski	9	5	5_351_w2	86/18/906	5_351	2018-03-27	2018-05-16	Fenitrotion	mg/kg	0.015	p.0,015			1	Eurofins	SFBA0-7	0.86	54.639276	18.452665	54.638477	18.456252	54.638217	18.456096	54.639017	18.452433
Robert Klawikowski	9	5	5_351_w2	86/18/906	5_351	2018-03-27	2018-05-16	Fenoxaprop-ethyl	mg/kg	0.15	p.0,15			1	Eurofins	SFBA0-7	0.86	54.639276	18.452665	54.638477	18.456252	54.638217	18.456096	54.639017	18.452433
Robert Klawikowski	9	5	5_351_w2	86/18/906	5_351	2018-03-27	2018-05-16	Fenpiclonil	mg/kg	0.15	p.0,15			1	Eurofins	SFBA0-7	0.86	54.639276	18.452665	54.638477	18.456252	54.638217	18.456096	54.639017	18.452433
Robert Klawikowski	9	5	5_351_w2	86/18/906	5_351	2018-03-27	2018-05-16	Fenpropatryna	mg/kg	0.015	p.0,015			1	Eurofins	SFBA0-7	0.86	54.639276	18.452665	54.638477	18.456252	54.638217	18.456096	54.639017	18.452433
Robert Klawikowski	9	5	5_351_w2	86/18/906	5_351	2018-03-27	2018-05-16	Fenpropimorf	mg/kg	0.15	p.0,15			1	Eurofins	SFBA0-7	0.86	54.639276	18.452665	54.638477	18.456252	54.638217	18.456096	54.639017	18.452433
Robert Klawikowski	9	5	5_351_w2	86/18/906	5_351	2018-03-27	2018-05-16	Fenson	mg/kg	0.03	p.0,03			1	Eurofins	SFBA0-7	0.86	54.639276	18.452665	54.638477	18.456252	54.638217	18.456096	54.639017	18.452433
Robert Klawikowski	9	5	5_351_w2	86/18/906	5_351	2018-03-27	2018-05-16	Fensulfotion	mg/kg	0.03	p.0,03			1	Eurofins	SFBA0-7	0.86	54.639276	18.452665	54.638477	18.456252	54.638217	18.456096	54.639017	18.452433
Robert Klawikowski	9	5	5_351_w2	86/18/906	5_351	2018-03-27	2018-05-16	Fewalerat (suma izomer ów)	mg/kg	0.015	p.0,015			1	Eurofins	SFBA0-7	0.86	54.639276	18.452665	54.638477	18.456252	54.638217	18.456096	54.639017	18.452433
Robert Klawikowski	9	5	5_351_w2	86/18/906	5_351	2018-03-27	2018-05-16	Fenwalerat	mg/kg	0.015	p.0,015			1	Eurofins	SFBA0-7	0.86	54.639276	18.452665	54.638477	18.456252	54.638217	18.456096	54.639017	18.452433
Robert Klawikowski	9	5	5_351_w2	86/18/906	5_351	2018-03-27	2018-05-16	Fenvalerate(RS-/SR-Izomer)	mg/kg	0.015	p.0,015			1	Eurofins	SFBA0-7	0.86	54.639276	18.452665	54.638477	18.456252	54.638217	18.456096	54.639017	18.452433
Robert Klawikowski	9	5	5_351_w2	86/18/906	5_351	2018-03-27	2018-05-16	Fipronil	mg/kg	0.012	p.0,012			1	Eurofins	SFBA0-7	0.86	54.639276	18.452665	54.638477	18.456252	54.638217	18.456096	54.639017	18.452433
Robert Klawikowski	9	5	5_351_w2	86/18/906	5_351	2018-03-27	2018-05-16	Fipronil,desulfinyl-	mg/kg	0.012	p.0,012			1	Eurofins	SFBA0-7	0.86	54.639276	18.452665	54.638477	18.456252	54.638217	18.456096	54.639017	18.452433
Robert Klawikowski	9	5	5_351_w2	86/18/906	5_351	2018-03-27	2018-05-16	Fipranil+Sulfonmetab.MB46136(suma)	mg/kg	0.015	p.0,015			1	Eurofins	SFBA0-7	0.86	54.639276	18.452665	54.638477	18.456252	54.638217	18.456096	54.639017	18.452433
Robert Klawikowski	9	5	5_351_w2	86/18/906	5_351	2018-03-27	2018-05-16	Fipronil sulfid	mg/kg	0.015	p.0,015			1	Eurofins	SFBA0-7	0.86	54.639276	18.452665	54.638477	18.456252	54.638217	18.456096	54.639017	18.452433
Robert Klawikowski	9	5	5_351_w2	86/18/906	5_351	2018-03-27	2018-05-16	Fipronil sulfon	mg/kg	0.015	p.0,015			1	Eurofins	SFBA0-7	0.86	54.639276	18.452665	54.638477	18.456252	54.638217	18.456096	54.639017	18.452433
Robert Klawikowski	9	5	5_351_w2	86/18/906	5_351	2018-03-27	2018-05-16	Flamprop-isopropyl	mg/kg	0.03	p.0,03			1	Eurofins	SFBA0-7	0.86	54.639276	18.452665	54.638477	18.456252	54.638217	18.456096	54.639017	18.452433
Robert Klawikowski	9	5	5_351_w2	86/18/906	5_351	2018-03-27	2018-05-16	Flamprop-methyl	mg/kg	0.03	p.0,03			1	Eurofins	SFBA0-7	0.86	54.639276	18.452665	54.638477	18.456252	54.638217	18.456096	54.639017	18.452433
Robert Klawikowski	9	5	5_351_w2	86/18/906	5_351	2018-03-27	2018-05-16	Flonikamid	mg/kg	0.15	p.0,15			1	Eurofins	SFBA0-7	0.86	54.639276	18.452665	54.638477	18.456252	54.638217	18.456096	54.639017	18.452433
Robert Klawikowski	9	5	5_351_w2	86/18/906	5_351	2018-03-27	2018-05-16	Fluazifop-butyl	mg/kg	0.15	p.0,15			1	Eurofins	SFBA0-7	0.86	54.639276	18.452665	54.638477	18.456252	54.638217	18.456096	54.639017	18.452433
Robert Klawikowski	9	5	5_351_w2	86/18/906	5_351	2018-03-27	2018-05-16	Fluazinam	mg/kg	0.03	p.0,03			1	Eurofins	SFBA0-7	0.86	54.639276	18.452665	54.638477	18.456252	54.638217	18.456096	54.639017	18.452433
Robert Klawikowski	9	5	5_351_w2	86/18/906	5_351	2018-03-27	2018-05-16	Fluchloralina	mg/kg	0.015	p.0,015			1	Eurofins	SFBA0-7	0.86	54.639276	18.452665	54.638477	18.456252	54.638217	18.456096	54.639017	18.452433
Robert Klawikowski	9	5	5_351_w2	86/18/906	5_351	2018-03-27	2018-05-16	Flucytrynat	mg/kg	0.03	p.0,03			1	Eurofins	SFBA0-7	0.86	54.639276	18.452665	54.638477	18.456252	54.638217	18.456096	54.639017	18.452433
Robert Klawikowski	9	5	5_351_w2	86/18/906	5_351	2018-03-27	2018-05-16	Flufenoksuron	mg/kg	0.03	p.0,03			1	Eurofins	SFBA0-7	0.86	54.639276	18.452665	54.638477	18.456252	54.638217	18.456096	54.639017	18.452433
Robert Klawikowski	9	5	5_351_w2	86/18/906	5_351	2018-03-27	2018-05-16	Flumethrine	mg/kg	0.03	p.0,03			1	Eurofins	SFBA0-7	0.86	54.639276	18.452665	54.638477	18.456252	54.638217	18.456096	54.639017	18.452433
Robert Klawikowski	9	5	5_351_w2	86/18/906	5_351	2018-03-27	2018-05-16	Flumetralin	mg/kg	0.015	p.0,015			1	Eurofins	SFBA0-7	0.86	54.639276	18.452665	54.638477	18.456252	54.638217	18.456096	54.639017	18.452433
Robert Klawikowski	9	5	5_351_w2	86/18/906	5_351	2018-03-27	2018-05-16	Flupikolid	mg/kg	0.03	p.0,03			1	Eurofins	SFBA0-7	0.86	54.639276	18.452665	54.638477	18.456252	54.638217	18.456096	54.639017	18.452433
Robert Klawikowski	9	5	5_351_w2	86/18/906	5_351	2018-03-27	2018-05-16	Fluorodifen	mg/kg	0.015	p.0,015			1	Eurofins	SFBA0-7	0.86	54.639276	18.452665	54.638477	18.456252	54.638217	18.456096	54.639017	18.452433
Robert Klawikowski	9	5	5_351_w2	86/18/906	5_351	2018-03-27	2018-05-16	Fluotrimazole	mg/kg	0.1	p.0,1			1	Eurofins	SFBA0-7	0.86	54.639276	18.452665	54.638477	18.456252	54.638217	18.456096	54.639017	18.452433
Robert Klawikowski	9	5	5_351_w2	86/18/906	5_351	2018-03-27	2018-05-16	Fluchinkonazol	mg/kg	0.03	p.0,03			1	Eurofins	SFBA0-7	0.86	54.639276	18.452665	54.638477	18.456252	54.638217	18.456096	54.639017	18.452433
Robert Klawikowski	9	5	5_351_w2	86/18/906	5_351	2018-03-27	2018-05-16	Flurenol-butyl	mg/kg	0.06	p.0,06			1	Eurofins	SFBA0-7	0.86	54.639276	18.452665	54.638477	18.456252	54.638217	18.456096	54.639017	18.452433
Robert Klawikowski	9	5	5_351_w2	86/18/906	5_351	2018-03-27	2018-05-16	Flurochloridon	mg/kg	0.03	p.0,03			1	Eurofins	SFBA0-7	0.86	54.639276	18.452665	54.638477	18.456252	54.638217	18.456096	54.639017	18.452433
Robert Klawikowski	9	5	5_351_w2	86/18/906	5_351	2018-03-27	2018-05-16	Flurtamone	mg/kg	0.03	p.0,03			1	Eurofins	SFBA0-7	0.86	54.639276	18.452665	54.638477	18.456252	54.638217	18.456096	54.639017	18.452433
Robert Klawikowski	9	5	5_351_w2	86/18/906	5_351	2018-03-27	2018-05-16	Flusilazol	mg/kg	0.075	p.0,075			1	Eurofins	SFBA0-7	0.86	54.639276	18.452665	54.638477	18.456252	54.638217	18.456096	54.639017	18.452433
Robert Klawikowski	9	5	5_351_w2	86/18/906	5_351	2018-03-27	2018-05-16	Folpet	mg/kg	0.03	p.0,03			1	Eurofins	SFBA0-7	0.86	54.639276	18.452665	54.638477	18.456252	54.638217	18.456096	54.639017	18.452433
Robert Klawikowski	9	5	5_351_w2	86/18/906	5_351	2018-03-27	2018-05-16	Fonofos	mg/kg	0.015	p.0,015			1	Eurofins	SFBA0-7	0.86	54.639276	18.452665	54.638477	18.456252	54.638217	18.456096	54.639017	18.452433
Robert Klawikowski	9	5	5_351_w2	86/18/906	5_351	2018-03-27	2018-05-16	Formotion	mg/kg	0.03	p.0,03			1	Eurofins	SFBA0-7	0.86	54.639276	18.452665	54.638477	18.456252	54.638217	18.456096	54.639017	18.452433
Robert Klawikowski	9	5	5_351_w2	86/18/906	5_351	2018-03-27	2018-05-16	Genite	mg/kg	0.03	p.0,03			1	Eurofins	SFBA0-7	0.86	54.639276	18.452665	54.638477	18.456252	54.638217	18.456096	54.639017	18.452433
Robert Klawikowski	9	5	5_351_w2	86/18/906	5_351	2018-03-27	2018-05-16	Halfenprox	mg/kg	0.03	p.0,03			1	Eurofins	SFBA0-7	0.86	54.639276	18.452665	54.638477	18.456252	54.638217	18.456096	54.639017	18.452433
Robert Klawikowski	9	5	5_351_w2	86/18/906	5_351	2018-03-27	2018-05-16	Haloxyfop-Ethoxyethyl	mg/kg	0.03	p.0,03			1	Eurofins	SFBA0-7	0.86	54.639276	18.452665	54.638477	18.456252	54.638217	18.456096	54.639017	18.452433
Robert Klawikowski	9	5	5_351_w2	86/18/906	5_351	2018-03-27	2018-05-16	Haloxyfop-methyl	mg/kg	0.15	p.0,15			1	Eurofins	SFBA0-7	0.86	54.639276	18.452665	54.638477	18.456252	54.638217	18.456096	54.639017	18.452433
Robert Klawikowski	9	5	5_351_w2	86/18/906	5_351	2018-03-27	2018-05-16	HCH (sumaizomerów-bez lindan)	mg/kg	0.015	p.0,015			1	Eurofins	SFBA0-7	0.86	54.639276	18.452665	54.638477	18.456252	54.638217	18.456096	54.639017	18.452433
Robert Klawikowski	9	5	5_351_w2	86/18/906	5_351	2018-03-27	2018-05-16	Alfa-HCH	mg/kg	0.015	p.0,015			1	Eurofins	SFBA0-7	0.86	54.639276	18.452665	54.638477	18.456252	54.638217	18.456096	54.639017	18.452433
Robert Klawikowski	9	5	5_351_w2	86/18/906	5_351	2018-03-27	2018-05-16	Beta-HCH	mg/kg	0.015	p.0,015			1	Eurofins	SFBA0-7	0.86	54.639276	18.452665	54.638477	18.456252	54.638217	18.456096	54.639017	18.452433
Robert Klawikowski	9	5	5_351_w2	86/18/906	5_351	2018-03-27	2018-05-16	Delta-HCH	mg/kg	0.015	p.0,015			1	Eurofins	SFBA0-7	0.86	54.639276	18.452665	54.638477	18.456252	54.638217	18.456096	54.639017	18.452433
Robert Klawikowski	9	5	5_351_w2	86/18/906	5_351	2018-03-27	2018-05-16	Epsilon-HCH	mg/kg	0.015	p.0,015			1	Eurofins	SFBA0-7	0.86	54.639276	18.452665	54.638477	18.456252	54.638217	18.456096	54.639017	18.452433
Robert Klawikowski	9	5	5_351_w2	86/18/906	5_351	2018-03-27	2018-05-16	Lindan(gamma-HCH)	mg/kg	0.015	p.0,015			1	Eurofins	SFBA0-7	0.86	54.639276	18.452665	54.638477	18.456252	54.638217	18.456096	54.639017	18.452433
Robert Klawikowski	9	5	5_351_w2	86/18/906	5_351	2018-03-27	2018-05-16	Heptachlor	mg/kg	0.015	p.0,015			1	Eurofins	SFBA0-7	0.86	54.639276	18.452665	54.638477	18.456252	54.638217	18.456096	54.639017	18.452433
Robert Klawikowski	9	5	5_351_w2	86/18/906	5_351	2018-03-27	2018-05-16	Heptachlor(suma)	mg/kg	0.015	p.0,015			1	Eurofins	SFBA0-7	0.86	54.639276	18.452665	54.638477	18.456252	54.638217	18.456096	54.639017	18.452433
Robert Klawikowski	9	5	5_351_w2	86/18/906	5_351	2018-03-27	2018-05-16	Heptahlor-trans-epoksyd	mg/kg	0.015	p.0,015			1	Eurofins	SFBA0-7	0.86	54.639276	18.452665	54.638477	18.456252	54.638217	18.456096	54.639017	18.452433
Robert Klawikowski	9	5	5_351_w2	86/18/906	5_351	2018-03-27	2018-05-16	Heptahlor-cis-epoksyd	mg/kg	0.015	p.0,015			1	Eurofins	SFBA0-7	0.86	54.639276	18.452665	54.638477	18.456252	54.638217	18.456096	54.639017	18.452433
Robert Klawikowski	9	5	5_351_w2	86/18/906	5_351	2018-03-27	2018-05-16	Heptenofos	mg/kg	0.03	p.0,03			1	Eurofins	SFBA0-7	0.86	54.639276	18.452665	54.638477	18.456252	54.638217	18.456096	54.639017	18.452433
Robert Klawikowski	9	5	5_351_w2	86/18/906	5_351	2018-03-27	2018-05-16	Heksachlorobenzen(HCB)	mg/kg	0.015	p.0,015			1	Eurofins	SFBA0-7	0.86	54.639276	18.452665	54.638477	18.456252	54.638217	18.456096	54.639017	18.452433
Robert Klawikowski	9	5	5_351_w2	86/18/906	5_351	2018-03-27	2018-05-16	Heksakonazol	mg/kg	0.045	p.0,045			1	Eurofins	SFBA0-7	0.86	54.639276	18.452665	54.638477	18.456252	54.638217	18.456096	54.639017	18.452433
Robert Klawikowski	9	5	5_351_w2	86/18/906	5_351	2018-03-27	2018-05-16	Indanofan	mg/kg	0.06	p.0,06			1	Eurofins	SFBA0-7	0.86	54.639276	18.452665	54.638477	18.456252	54.638217	18.456096	54.639017	18.452433
Robert Klawikowski	9	5	5_351_w2	86/18/906	5_351	2018-03-27	2018-05-16	Indoksakarb	mg/kg	0.015	p.0,015			1	Eurofins	SFBA0-7	0.86	54.639276	18.452665	54.638477	18.456252	54.638217	18.456096	54.639017	18.452433
Robert Klawikowski	9	5	5_351_w2	86/18/906	5_351	2018-03-27	2018-05-16	Jodofenfos	mg/kg	0.015	p.0,015			1	Eurofins	SFBA0-7	0.86	54.639276	18.452665	54.638477	18.456252	54.638217	18.456096	54.639017	18.452433
Robert Klawikowski	9	5	5_351_w2	86/18/906	5_351	2018-03-27	2018-05-16	Ioxynil-Octanoate	mg/kg	0.03	p.0,03			1	Eurofins	SFBA0-7	0.86	54.639276	18.452665	54.638477	18.456252	54.638217	18.456096	54.639017	18.452433
Robert Klawikowski	9	5	5_351_w2	86/18/906	5_351	2018-03-27	2018-05-16	Iprobenfos	mg/kg	0.03	p.0,03			1	Eurofins	SFBA0-7	0.86	54.639276	18.452665	54.638477	18.456252	54.638217	18.456096	54.639017	18.452433
Robert Klawikowski	9	5	5_351_w2	86/18/906	5_351	2018-03-27	2018-05-16	Iprodion	mg/kg	0.03	p.0,03			1	Eurofins	SFBA0-7	0.86	54.639276	18.452665	54.638477	18.456252	54.638217	18.456096	54.639017	18.452433
Robert Klawikowski	9	5	5_351_w2	86/18/906	5_351	2018-03-27	2018-05-16	Isazophos	mg/kg	0.03	p.0,03			1	Eurofins	SFBA0-7	0.86	54.639276	18.452665	54.638477	18.456252	54.638217	18.456096	54.639017	18.452433
Robert Klawikowski	9	5	5_351_w2	86/18/906	5_351	2018-03-27	2018-05-16	Isobenzan	mg/kg	0.015	p.0,015			1	Eurofins	SFBA0-7	0.86	54.639276	18.452665	54.638477	18.456252	54.638217	18.456096	54.639017	18.452433
Robert Klawikowski	9	5	5_351_w2	86/18/906	5_351	2018-03-27	2018-05-16	Isocarbofos	mg/kg	0.03	p.0,03			1	Eurofins	SFBA0-7	0.86	54.639276	18.452665	54.638477	18.456252	54.638217	18.456096	54.639017	18.452433
Robert Klawikowski	9	5	5_351_w2	86/18/906	5_351	2018-03-27	2018-05-16	Izodryna	mg/kg	0.015	p.0,015			1	Eurofins	SFBA0-7	0.86	54.639276	18.452665	54.638477	18.456252	54.638217	18.456096	54.639017	18.452433
Robert Klawikowski	9	5	5_351_w2	86/18/906	5_351	2018-03-27	2018-05-16	Izofenfos	mg/kg	0.015	p.0,015			1	Eurofins	SFBA0-7	0.86	54.639276	18.452665	54.638477	18.456252	54.638217	18.456096	54.639017	18.452433
Robert Klawikowski	9	5	5_351_w2	86/18/906	5_351	2018-03-27	2018-05-16	Isofenphos-Methyl	mg/kg	0.015	p.0,015			1	Eurofins	SFBA0-7	0.86	54.639276	18.452665	54.638477	18.456252	54.638217	18.456096	54.639017	18.452433
Robert Klawikowski	9	5	5_351_w2	86/18/906	5_351	2018-03-27	2018-05-16	Isomethiozin	mg/kg	0.03	p.0,03			1	Eurofins	SFBA0-7	0.86	54.639276	18.452665	54.638477	18.456252	54.638217	18.456096	54.639017	18.452433
Robert Klawikowski	9	5	5_351_w2	86/18/906	5_351	2018-03-27	2018-05-16	Isopropalin	mg/kg	0.015	p.0,015			1	Eurofins	SFBA0-7	0.86	54.639276	18.452665	54.638477	18.456252	54.638217	18.456096	54.639017	18.452433
Robert Klawikowski	9	5	5_351_w2	86/18/906	5_351	2018-03-27	2018-05-16	Isoxadifen-ethyl	mg/kg	0.03	p.0,03			1	Eurofins	SFBA0-7	0.86	54.639276	18.452665	54.638477	18.456252	54.638217	18.456096	54.639017	18.452433
Robert Klawikowski	9	5	5_351_w2	86/18/906	5_351	2018-03-27	2018-05-16	Krezoksym-metylu	mg/kg	0.015	p.0,015			1	Eurofins	SFBA0-7	0.86	54.639276	18.452665	54.638477	18.456252	54.638217	18.456096	54.639017	18.452433
Robert Klawikowski	9	5	5_351_w2	86/18/906	5_351	2018-03-27	2018-05-16	Lactofen	mg/kg	0.03	p.0,03			1	Eurofins	SFBA0-7	0.86	54.639276	18.452665	54.638477	18.456252	54.638217	18.456096	54.639017	18.452433
Robert Klawikowski	9	5	5_351_w2	86/18/906	5_351	2018-03-27	2018-05-16	Leptophos	mg/kg	0.03	p.0,03			1	Eurofins	SFBA0-7	0.86	54.639276	18.452665	54.638477	18.456252	54.638217	18.456096	54.639017	18.452433
Robert Klawikowski	9	5	5_351_w2	86/18/906	5_351	2018-03-27	2018-05-16	Lufenuron	mg/kg	0.036	p.0,036			1	Eurofins	SFBA0-7	0.86	54.639276	18.452665	54.638477	18.456252	54.638217	18.456096	54.639017	18.452433
Robert Klawikowski	9	5	5_351_w2	86/18/906	5_351	2018-03-27	2018-05-16	Malaokson	mg/kg	0.015	p.0,015			1	Eurofins	SFBA0-7	0.86	54.639276	18.452665	54.638477	18.456252	54.638217	18.456096	54.639017	18.452433
Robert Klawikowski	9	5	5_351_w2	86/18/906	5_351	2018-03-27	2018-05-16	Malation	mg/kg	0.03	p.0,03			1	Eurofins	SFBA0-7	0.86	54.639276	18.452665	54.638477	18.456252	54.638217	18.456096	54.639017	18.452433
Robert Klawikowski	9	5	5_351_w2	86/18/906	5_351	2018-03-27	2018-05-16	Mekarbam	mg/kg	0.03	p.0,03			1	Eurofins	SFBA0-7	0.86	54.639276	18.452665	54.638477	18.456252	54.638217	18.456096	54.639017	18.452433
Robert Klawikowski	9	5	5_351_w2	86/18/906	5_351	2018-03-27	2018-05-16	Mephosfolan	mg/kg	0.03	p.0,03			1	Eurofins	SFBA0-7	0.86	54.639276	18.452665	54.638477	18.456252	54.638217	18.456096	54.639017	18.452433
Robert Klawikowski	9	5	5_351_w2	86/18/906	5_351	2018-03-27	2018-05-16	Merphos	mg/kg	0.03	p.0,03			1	Eurofins	SFBA0-7	0.86	54.639276	18.452665	54.638477	18.456252	54.638217	18.456096	54.639017	18.452433
Robert Klawikowski	9	5	5_351_w2	86/18/906	5_351	2018-03-27	2018-05-16	Metazachlor	mg/kg	0.03	p.0,03			1	Eurofins	SFBA0-7	0.86	54.639276	18.452665	54.638477	18.456252	54.638217	18.456096	54.639017	18.452433
Robert Klawikowski	9	5	5_351_w2	86/18/906	5_351	2018-03-27	2018-05-16	Metakrifos	mg/kg	0.15	p.0,15			1	Eurofins	SFBA0-7	0.86	54.639276	18.452665	54.638477	18.456252	54.638217	18.456096	54.639017	18.452433
Robert Klawikowski	9	5	5_351_w2	86/18/906	5_351	2018-03-27	2018-05-16	Metydation	mg/kg	0.036	p.0,03600			1	Eurofins	SFBA0-7	0.86	54.639276	18.452665	54.638477	18.456252	54.638217	18.456096	54.639017	18.452433
Robert Klawikowski	9	5	5_351_w2	86/18/906	5_351	2018-03-27	2018-05-16	Metoksychlor	mg/kg	0.015	p.0,015			1	Eurofins	SFBA0-7	0.86	54.639276	18.452665	54.638477	18.456252	54.638217	18.456096	54.639017	18.452433
Robert Klawikowski	9	5	5_351_w2	86/18/906	5_351	2018-03-27	2018-05-16	Metolachlor	mg/kg	0.15	p.0,15			1	Eurofins	SFBA0-7	0.86	54.639276	18.452665	54.638477	18.456252	54.638217	18.456096	54.639017	18.452433
Robert Klawikowski	9	5	5_351_w2	86/18/906	5_351	2018-03-27	2018-05-16	Metrafenon	mg/kg	0.15	p.0,15			1	Eurofins	SFBA0-7	0.86	54.639276	18.452665	54.638477	18.456252	54.638217	18.456096	54.639017	18.452433
Robert Klawikowski	9	5	5_351_w2	86/18/906	5_351	2018-03-27	2018-05-16	Metribuzyn	mg/kg	0.03	p.0,03			1	Eurofins	SFBA0-7	0.86	54.639276	18.452665	54.638477	18.456252	54.638217	18.456096	54.639017	18.452433
Robert Klawikowski	9	5	5_351_w2	86/18/906	5_351	2018-03-27	2018-05-16	Mevinfos	mg/kg	0.03	p.0,03			1	Eurofins	SFBA0-7	0.86	54.639276	18.452665	54.638477	18.456252	54.638217	18.456096	54.639017	18.452433
Robert Klawikowski	9	5	5_351_w2	86/18/906	5_351	2018-03-27	2018-05-16	Mirex	mg/kg	0.015	p.0,015			1	Eurofins	SFBA0-7	0.86	54.639276	18.452665	54.638477	18.456252	54.638217	18.456096	54.639017	18.452433
Robert Klawikowski	9	5	5_351_w2	86/18/906	5_351	2018-03-27	2018-05-16	Molinate	mg/kg	0.045	p.0,045			1	Eurofins	SFBA0-7	0.86	54.639276	18.452665	54.638477	18.456252	54.638217	18.456096	54.639017	18.452433
Robert Klawikowski	9	5	5_351_w2	86/18/906	5_351	2018-03-27	2018-05-16	Myklobutanil	mg/kg	0.015	0.015			1	Eurofins	SFBA0-7	0.86	54.639276	18.452665	54.638477	18.456252	54.638217	18.456096	54.639017	18.452433
Robert Klawikowski	9	5	5_351_w2	86/18/906	5_351	2018-03-27	2018-05-16	Nitralin	mg/kg	0.03	p.0,03			1	Eurofins	SFBA0-7	0.86	54.639276	18.452665	54.638477	18.456252	54.638217	18.456096	54.639017	18.452433
Robert Klawikowski	9	5	5_351_w2	86/18/906	5_351	2018-03-27	2018-05-16	Nitrapyrin	mg/kg	0.06	p.0,06			1	Eurofins	SFBA0-7	0.86	54.639276	18.452665	54.638477	18.456252	54.638217	18.456096	54.639017	18.452433
Robert Klawikowski	9	5	5_351_w2	86/18/906	5_351	2018-03-27	2018-05-16	Nitrofen	mg/kg	0.03	p.0,03			1	Eurofins	SFBA0-7	0.86	54.639276	18.452665	54.638477	18.456252	54.638217	18.456096	54.639017	18.452433
Robert Klawikowski	9	5	5_351_w2	86/18/906	5_351	2018-03-27	2018-05-16	Nitrothal-isopropyl	mg/kg	0.03	p.0,03			1	Eurofins	SFBA0-7	0.86	54.639276	18.452665	54.638477	18.456252	54.638217	18.456096	54.639017	18.452433
Robert Klawikowski	9	5	5_351_w2	86/18/906	5_351	2018-03-27	2018-05-16	Norflurazon	mg/kg	0.15	p.0,15			1	Eurofins	SFBA0-7	0.86	54.639276	18.452665	54.638477	18.456252	54.638217	18.456096	54.639017	18.452433
Robert Klawikowski	9	5	5_351_w2	86/18/906	5_351	2018-03-27	2018-05-16	Nuarimol	mg/kg	0.03	p.0,03			1	Eurofins	SFBA0-7	0.86	54.639276	18.452665	54.638477	18.456252	54.638217	18.456096	54.639017	18.452433
Robert Klawikowski	9	5	5_351_w2	86/18/906	5_351	2018-03-27	2018-05-16	Ometoat	mg/kg	0.3	p.0,3			1	Eurofins	SFBA0-7	0.86	54.639276	18.452665	54.638477	18.456252	54.638217	18.456096	54.639017	18.452433
Robert Klawikowski	9	5	5_351_w2	86/18/906	5_351	2018-03-27	2018-05-16	Oxadiazon	mg/kg	0.015	p.0,015			1	Eurofins	SFBA0-7	0.86	54.639276	18.452665	54.638477	18.456252	54.638217	18.456096	54.639017	18.452433
Robert Klawikowski	9	5	5_351_w2	86/18/906	5_351	2018-03-27	2018-05-16	Oxydemeton-methyl	mg/kg	0.03	p.0,03			1	Eurofins	SFBA0-7	0.86	54.639276	18.452665	54.638477	18.456252	54.638217	18.456096	54.639017	18.452433
Robert Klawikowski	9	5	5_351_w2	86/18/906	5_351	2018-03-27	2018-05-16	Oksyfluoroten	mg/kg	0.03	p.0,03			1	Eurofins	SFBA0-7	0.86	54.639276	18.452665	54.638477	18.456252	54.638217	18.456096	54.639017	18.452433
Robert Klawikowski	9	5	5_351_w2	86/18/906	5_351	2018-03-27	2018-05-16	Paklobutrazol	mg/kg	0.12	p.0,12			1	Eurofins	SFBA0-7	0.86	54.639276	18.452665	54.638477	18.456252	54.638217	18.456096	54.639017	18.452433
Robert Klawikowski	9	5	5_351_w2	86/18/906	5_351	2018-03-27	2018-05-16	Paraoxon-ethyl	mg/kg	0.045	p.0,045			1	Eurofins	SFBA0-7	0.86	54.639276	18.452665	54.638477	18.456252	54.638217	18.456096	54.639017	18.452433
Robert Klawikowski	9	5	5_351_w2	86/18/906	5_351	2018-03-27	2018-05-16	Paraokson metylowy	mg/kg	0.045	p.0,045			1	Eurofins	SFBA0-7	0.86	54.639276	18.452665	54.638477	18.456252	54.638217	18.456096	54.639017	18.452433
Robert Klawikowski	9	5	5_351_w2	86/18/906	5_351	2018-03-27	2018-05-16	Paration	mg/kg	0.015	p.0,015			1	Eurofins	SFBA0-7	0.86	54.639276	18.452665	54.638477	18.456252	54.638217	18.456096	54.639017	18.452433
Robert Klawikowski	9	5	5_351_w2	86/18/906	5_351	2018-03-27	2018-05-16	Paration metylu	mg/kg	0.015	p.0,015			1	Eurofins	SFBA0-7	0.86	54.639276	18.452665	54.638477	18.456252	54.638217	18.456096	54.639017	18.452433
Robert Klawikowski	9	5	5_351_w2	86/18/906	5_351	2018-03-27	2018-05-16	Paration metylu/Paraokson metylu (suma)	mg/kg	0.015	p.0,015			1	Eurofins	SFBA0-7	0.86	54.639276	18.452665	54.638477	18.456252	54.638217	18.456096	54.639017	18.452433
Robert Klawikowski	9	5	5_351_w2	86/18/906	5_351	2018-03-27	2018-05-16	PCB IUPAC 101	mg/kg	0.015	p.0,015			1	Eurofins	SFBA0-7	0.86	54.639276	18.452665	54.638477	18.456252	54.638217	18.456096	54.639017	18.452433
Robert Klawikowski	9	5	5_351_w2	86/18/906	5_351	2018-03-27	2018-05-16	PCB 118	mg/kg	0.015	p.0,015			1	Eurofins	SFBA0-7	0.86	54.639276	18.452665	54.638477	18.456252	54.638217	18.456096	54.639017	18.452433
Robert Klawikowski	9	5	5_351_w2	86/18/906	5_351	2018-03-27	2018-05-16	PCB 138	mg/kg	0.015	p.0,015			1	Eurofins	SFBA0-7	0.86	54.639276	18.452665	54.638477	18.456252	54.638217	18.456096	54.639017	18.452433
Robert Klawikowski	9	5	5_351_w2	86/18/906	5_351	2018-03-27	2018-05-16	PCB 153	mg/kg	0.015	p.0,015			1	Eurofins	SFBA0-7	0.86	54.639276	18.452665	54.638477	18.456252	54.638217	18.456096	54.639017	18.452433
Robert Klawikowski	9	5	5_351_w2	86/18/906	5_351	2018-03-27	2018-05-16	PCB 180	mg/kg	0.015	p.0,015			1	Eurofins	SFBA0-7	0.86	54.639276	18.452665	54.638477	18.456252	54.638217	18.456096	54.639017	18.452433
Robert Klawikowski	9	5	5_351_w2	86/18/906	5_351	2018-03-27	2018-05-16	PCB 28	mg/kg	0.015	p.0,015			1	Eurofins	SFBA0-7	0.86	54.639276	18.452665	54.638477	18.456252	54.638217	18.456096	54.639017	18.452433
Robert Klawikowski	9	5	5_351_w2	86/18/906	5_351	2018-03-27	2018-05-16	PCB 52	mg/kg	0.015	p.0,015			1	Eurofins	SFBA0-7	0.86	54.639276	18.452665	54.638477	18.456252	54.638217	18.456096	54.639017	18.452433
Robert Klawikowski	9	5	5_351_w2	86/18/906	5_351	2018-03-27	2018-05-16	Penkonazol	mg/kg	0.03	p.0,03			1	Eurofins	SFBA0-7	0.86	54.639276	18.452665	54.638477	18.456252	54.638217	18.456096	54.639017	18.452433
Robert Klawikowski	9	5	5_351_w2	86/18/906	5_351	2018-03-27	2018-05-16	Pendimetalina	mg/kg	0.015	p.0,015			1	Eurofins	SFBA0-7	0.86	54.639276	18.452665	54.638477	18.456252	54.638217	18.456096	54.639017	18.452433
Robert Klawikowski	9	5	5_351_w2	86/18/906	5_351	2018-03-27	2018-05-16	Pentachloranisol	mg/kg	0.015	p.0,015			1	Eurofins	SFBA0-7	0.86	54.639276	18.452665	54.638477	18.456252	54.638217	18.456096	54.639017	18.452433
Robert Klawikowski	9	5	5_351_w2	86/18/906	5_351	2018-03-27	2018-05-16	Pentachloraniline	mg/kg	0.03	p.0,03			1	Eurofins	SFBA0-7	0.86	54.639276	18.452665	54.638477	18.456252	54.638217	18.456096	54.639017	18.452433
Robert Klawikowski	9	5	5_351_w2	86/18/906	5_351	2018-03-27	2018-05-16	Pentachlorobenzen	mg/kg	0.015	p.0,015			1	Eurofins	SFBA0-7	0.86	54.639276	18.452665	54.638477	18.456252	54.638217	18.456096	54.639017	18.452433
Robert Klawikowski	9	5	5_351_w2	86/18/906	5_351	2018-03-27	2018-05-16	Pentachlorothioanisole	mg/kg	0.03	p.0,03			1	Eurofins	SFBA0-7	0.86	54.639276	18.452665	54.638477	18.456252	54.638217	18.456096	54.639017	18.452433
Robert Klawikowski	9	5	5_351_w2	86/18/906	5_351	2018-03-27	2018-05-16	Permetryna	mg/kg	0.06	p.0,06			1	Eurofins	SFBA0-7	0.86	54.639276	18.452665	54.638477	18.456252	54.638217	18.456096	54.639017	18.452433
Robert Klawikowski	9	5	5_351_w2	86/18/906	5_351	2018-03-27	2018-05-16	Pertan	mg/kg	0.6	p.0,6			1	Eurofins	SFBA0-7	0.86	54.639276	18.452665	54.638477	18.456252	54.638217	18.456096	54.639017	18.452433
Robert Klawikowski	9	5	5_351_w2	86/18/906	5_351	2018-03-27	2018-05-16	Phenkapton	mg/kg	0.03	p.0,03			1	Eurofins	SFBA0-7	0.86	54.639276	18.452665	54.638477	18.456252	54.638217	18.456096	54.639017	18.452433
Robert Klawikowski	9	5	5_351_w2	86/18/906	5_351	2018-03-27	2018-05-16	Phenothrin	mg/kg	0.03	p.0,03			1	Eurofins	SFBA0-7	0.86	54.639276	18.452665	54.638477	18.456252	54.638217	18.456096	54.639017	18.452433
Robert Klawikowski	9	5	5_351_w2	86/18/906	5_351	2018-03-27	2018-05-16	Fentoat	mg/kg	0.03	p.0,03			1	Eurofins	SFBA0-7	0.86	54.639276	18.452665	54.638477	18.456252	54.638217	18.456096	54.639017	18.452433
Robert Klawikowski	9	5	5_351_w2	86/18/906	5_351	2018-03-27	2018-05-16	Fosalon	mg/kg	0.03	p.0,03			1	Eurofins	SFBA0-7	0.86	54.639276	18.452665	54.638477	18.456252	54.638217	18.456096	54.639017	18.452433
Robert Klawikowski	9	5	5_351_w2	86/18/906	5_351	2018-03-27	2018-05-16	Phosfolane	mg/kg	0.03	p.0,03			1	Eurofins	SFBA0-7	0.86	54.639276	18.452665	54.638477	18.456252	54.638217	18.456096	54.639017	18.452433
Robert Klawikowski	9	5	5_351_w2	86/18/906	5_351	2018-03-27	2018-05-16	Fosmet	mg/kg	0.03	p.0,03			1	Eurofins	SFBA0-7	0.86	54.639276	18.452665	54.638477	18.456252	54.638217	18.456096	54.639017	18.452433
Robert Klawikowski	9	5	5_351_w2	86/18/906	5_351	2018-03-27	2018-05-16	Picolinafen	mg/kg	0.03	p.0,03			1	Eurofins	SFBA0-7	0.86	54.639276	18.452665	54.638477	18.456252	54.638217	18.456096	54.639017	18.452433
Robert Klawikowski	9	5	5_351_w2	86/18/906	5_351	2018-03-27	2018-05-16	Pikoksystrobina	mg/kg	0.06	p.0,06			1	Eurofins	SFBA0-7	0.86	54.639276	18.452665	54.638477	18.456252	54.638217	18.456096	54.639017	18.452433
Robert Klawikowski	9	5	5_351_w2	86/18/906	5_351	2018-03-27	2018-05-16	Piperophos	mg/kg	0.03	p.0,03			1	Eurofins	SFBA0-7	0.86	54.639276	18.452665	54.638477	18.456252	54.638217	18.456096	54.639017	18.452433
Robert Klawikowski	9	5	5_351_w2	86/18/906	5_351	2018-03-27	2018-05-16	Pirymifos metylowy	mg/kg	0.03	p.0,03			1	Eurofins	SFBA0-7	0.86	54.639276	18.452665	54.638477	18.456252	54.638217	18.456096	54.639017	18.452433
Robert Klawikowski	9	5	5_351_w2	86/18/906	5_351	2018-03-27	2018-05-16	Pirymifos etylu	mg/kg	0.03	p.0,03			1	Eurofins	SFBA0-7	0.86	54.639276	18.452665	54.638477	18.456252	54.638217	18.456096	54.639017	18.452433
Robert Klawikowski	9	5	5_351_w2	86/18/906	5_351	2018-03-27	2018-05-16	Plifenate	mg/kg	0.03	p.0,03			1	Eurofins	SFBA0-7	0.86	54.639276	18.452665	54.638477	18.456252	54.638217	18.456096	54.639017	18.452433
Robert Klawikowski	9	5	5_351_w2	86/18/906	5_351	2018-03-27	2018-05-16	Praletryna	mg/kg	0.03	p.0,03			1	Eurofins	SFBA0-7	0.86	54.639276	18.452665	54.638477	18.456252	54.638217	18.456096	54.639017	18.452433
Robert Klawikowski	9	5	5_351_w2	86/18/906	5_351	2018-03-27	2018-05-16	Procymidon	mg/kg	0.045	p.0,045			1	Eurofins	SFBA0-7	0.86	54.639276	18.452665	54.638477	18.456252	54.638217	18.456096	54.639017	18.452433
Robert Klawikowski	9	5	5_351_w2	86/18/906	5_351	2018-03-27	2018-05-16	Profenfos	mg/kg	0.015	p.0,015			1	Eurofins	SFBA0-7	0.86	54.639276	18.452665	54.638477	18.456252	54.638217	18.456096	54.639017	18.452433
Robert Klawikowski	9	5	5_351_w2	86/18/906	5_351	2018-03-27	2018-05-16	Profluralina	mg/kg	0.015	p.0,015			1	Eurofins	SFBA0-7	0.86	54.639276	18.452665	54.638477	18.456252	54.638217	18.456096	54.639017	18.452433
Robert Klawikowski	9	5	5_351_w2	86/18/906	5_351	2018-03-27	2018-05-16	Propachlor	mg/kg	0.03	p.0,03			1	Eurofins	SFBA0-7	0.86	54.639276	18.452665	54.638477	18.456252	54.638217	18.456096	54.639017	18.452433
Robert Klawikowski	9	5	5_351_w2	86/18/906	5_351	2018-03-27	2018-05-16	Propanil	mg/kg	0.03	p.0,03			1	Eurofins	SFBA0-7	0.86	54.639276	18.452665	54.638477	18.456252	54.638217	18.456096	54.639017	18.452433
Robert Klawikowski	9	5	5_351_w2	86/18/906	5_351	2018-03-27	2018-05-16	Propazyna	mg/kg	0.15	p.0,15			1	Eurofins	SFBA0-7	0.86	54.639276	18.452665	54.638477	18.456252	54.638217	18.456096	54.639017	18.452433
Robert Klawikowski	9	5	5_351_w2	86/18/906	5_351	2018-03-27	2018-05-16	Propetamfos	mg/kg	0.015	p.0,015			1	Eurofins	SFBA0-7	0.86	54.639276	18.452665	54.638477	18.456252	54.638217	18.456096	54.639017	18.452433
Robert Klawikowski	9	5	5_351_w2	86/18/906	5_351	2018-03-27	2018-05-16	Propikonazol	mg/kg	0.03	p.0,03			1	Eurofins	SFBA0-7	0.86	54.639276	18.452665	54.638477	18.456252	54.638217	18.456096	54.639017	18.452433
Robert Klawikowski	9	5	5_351_w2	86/18/906	5_351	2018-03-27	2018-05-16	Propyzamid	mg/kg	0.03	p.0,03			1	Eurofins	SFBA0-7	0.86	54.639276	18.452665	54.638477	18.456252	54.638217	18.456096	54.639017	18.452433
Robert Klawikowski	9	5	5_351_w2	86/18/906	5_351	2018-03-27	2018-05-16	Protiofos	mg/kg	0.015	p.0,015			1	Eurofins	SFBA0-7	0.86	54.639276	18.452665	54.638477	18.456252	54.638217	18.456096	54.639017	18.452433
Robert Klawikowski	9	5	5_351_w2	86/18/906	5_351	2018-03-27	2018-05-16	Prothoat	mg/kg	0.03	p.0,03			1	Eurofins	SFBA0-7	0.86	54.639276	18.452665	54.638477	18.456252	54.638217	18.456096	54.639017	18.452433
Robert Klawikowski	9	5	5_351_w2	86/18/906	5_351	2018-03-27	2018-05-16	Pyraclofos	mg/kg	0.03	p.0,03			1	Eurofins	SFBA0-7	0.86	54.639276	18.452665	54.638477	18.456252	54.638217	18.456096	54.639017	18.452433
Robert Klawikowski	9	5	5_351_w2	86/18/906	5_351	2018-03-27	2018-05-16	Pyraflufen-ethyl	mg/kg	0.06	p.0,06			1	Eurofins	SFBA0-7	0.86	54.639276	18.452665	54.638477	18.456252	54.638217	18.456096	54.639017	18.452433
Robert Klawikowski	9	5	5_351_w2	86/18/906	5_351	2018-03-27	2018-05-16	Pirazofos	mg/kg	0.03	p.0,03			1	Eurofins	SFBA0-7	0.86	54.639276	18.452665	54.638477	18.456252	54.638217	18.456096	54.639017	18.452433
Robert Klawikowski	9	5	5_351_w2	86/18/906	5_351	2018-03-27	2018-05-16	Pyretryny	mg/kg	0.06	p.0,06			1	Eurofins	SFBA0-7	0.86	54.639276	18.452665	54.638477	18.456252	54.638217	18.456096	54.639017	18.452433
Robert Klawikowski	9	5	5_351_w2	86/18/906	5_351	2018-03-27	2018-05-16	Pirydaben	mg/kg	0.015	p.0,015			1	Eurofins	SFBA0-7	0.86	54.639276	18.452665	54.638477	18.456252	54.638217	18.456096	54.639017	18.452433
Robert Klawikowski	9	5	5_351_w2	86/18/906	5_351	2018-03-27	2018-05-16	Pyridaphenthion	mg/kg	0.03	p.0,03			1	Eurofins	SFBA0-7	0.86	54.639276	18.452665	54.638477	18.456252	54.638217	18.456096	54.639017	18.452433
Robert Klawikowski	9	5	5_351_w2	86/18/906	5_351	2018-03-27	2018-05-16	Pyrifenox	mg/kg	0.03	p.0,03			1	Eurofins	SFBA0-7	0.86	54.639276	18.452665	54.638477	18.456252	54.638217	18.456096	54.639017	18.452433
Robert Klawikowski	9	5	5_351_w2	86/18/906	5_351	2018-03-27	2018-05-16	Pirimithate	mg/kg	0.15	p.0,15			1	Eurofins	SFBA0-7	0.86	54.639276	18.452665	54.638477	18.456252	54.638217	18.456096	54.639017	18.452433
Robert Klawikowski	9	5	5_351_w2	86/18/906	5_351	2018-03-27	2018-05-16	Chinalofos	mg/kg	0.015	p.0,015			1	Eurofins	SFBA0-7	0.86	54.639276	18.452665	54.638477	18.456252	54.638217	18.456096	54.639017	18.452433
Robert Klawikowski	9	5	5_351_w2	86/18/906	5_351	2018-03-27	2018-05-16	Chinoksyfen	mg/kg	0.045	p.0,045			1	Eurofins	SFBA0-7	0.86	54.639276	18.452665	54.638477	18.456252	54.638217	18.456096	54.639017	18.452433
Robert Klawikowski	9	5	5_351_w2	86/18/906	5_351	2018-03-27	2018-05-16	Kwintocen	mg/kg	0.015	p.0,015			1	Eurofins	SFBA0-7	0.86	54.639276	18.452665	54.638477	18.456252	54.638217	18.456096	54.639017	18.452433
Robert Klawikowski	9	5	5_351_w2	86/18/906	5_351	2018-03-27	2018-05-16	Quintozene (suma)	mg/kg	0.015	p.0,015			1	Eurofins	SFBA0-7	0.86	54.639276	18.452665	54.638477	18.456252	54.638217	18.456096	54.639017	18.452433
Robert Klawikowski	9	5	5_351_w2	86/18/906	5_351	2018-03-27	2018-05-16	Chizalofop etylowy	mg/kg	0.03	p.0,03			1	Eurofins	SFBA0-7	0.86	54.639276	18.452665	54.638477	18.456252	54.638217	18.456096	54.639017	18.452433
Robert Klawikowski	9	5	5_351_w2	86/18/906	5_351	2018-03-27	2018-05-16	Resmetryna	mg/kg	0.3	p.0,3			1	Eurofins	SFBA0-7	0.86	54.639276	18.452665	54.638477	18.456252	54.638217	18.456096	54.639017	18.452433
Robert Klawikowski	9	5	5_351_w2	86/18/906	5_351	2018-03-27	2018-05-16	S421 Octachlordipropyleter)	mg/kg	0.03	p.0,03			1	Eurofins	SFBA0-7	0.86	54.639276	18.452665	54.638477	18.456252	54.638217	18.456096	54.639017	18.452433
Robert Klawikowski	9	5	5_351_w2	86/18/906	5_351	2018-03-27	2018-05-16	Spiromesifen	mg/kg	0.03	p.0,03			1	Eurofins	SFBA0-7	0.86	54.639276	18.452665	54.638477	18.456252	54.638217	18.456096	54.639017	18.452433
Robert Klawikowski	9	5	5_351_w2	86/18/906	5_351	2018-03-27	2018-05-16	Sulfotep	mg/kg	0.03	p.0,03			1	Eurofins	SFBA0-7	0.86	54.639276	18.452665	54.638477	18.456252	54.638217	18.456096	54.639017	18.452433
Robert Klawikowski	9	5	5_351_w2	86/18/906	5_351	2018-03-27	2018-05-16	Sulprofos	mg/kg	0.03	p.0,03			1	Eurofins	SFBA0-7	0.86	54.639276	18.452665	54.638477	18.456252	54.638217	18.456096	54.639017	18.452433
Robert Klawikowski	9	5	5_351_w2	86/18/906	5_351	2018-03-27	2018-05-16	Swep	mg/kg	0.03	p.0,03			1	Eurofins	SFBA0-7	0.86	54.639276	18.452665	54.638477	18.456252	54.638217	18.456096	54.639017	18.452433
Robert Klawikowski	9	5	5_351_w2	86/18/906	5_351	2018-03-27	2018-05-16	tau-Fluvalinate	mg/kg	0.015	p.0,015			1	Eurofins	SFBA0-7	0.86	54.639276	18.452665	54.638477	18.456252	54.638217	18.456096	54.639017	18.452433
Robert Klawikowski	9	5	5_351_w2	86/18/906	5_351	2018-03-27	2018-05-16	Tebupirimfos	mg/kg	0.015	p.0,015			1	Eurofins	SFBA0-7	0.86	54.639276	18.452665	54.638477	18.456252	54.638217	18.456096	54.639017	18.452433
Robert Klawikowski	9	5	5_351_w2	86/18/906	5_351	2018-03-27	2018-05-16	Technazen	mg/kg	0.015	p.0,015			1	Eurofins	SFBA0-7	0.86	54.639276	18.452665	54.638477	18.456252	54.638217	18.456096	54.639017	18.452433
Robert Klawikowski	9	5	5_351_w2	86/18/906	5_351	2018-03-27	2018-05-16	Teflutryna	mg/kg	0.015	p.0,015			1	Eurofins	SFBA0-7	0.86	54.639276	18.452665	54.638477	18.456252	54.638217	18.456096	54.639017	18.452433
Robert Klawikowski	9	5	5_351_w2	86/18/906	5_351	2018-03-27	2018-05-16	Temephos	mg/kg	0.03	p.0,03			1	Eurofins	SFBA0-7	0.86	54.639276	18.452665	54.638477	18.456252	54.638217	18.456096	54.639017	18.452433
Robert Klawikowski	9	5	5_351_w2	86/18/906	5_351	2018-03-27	2018-05-16	Terbufos	mg/kg	0.015	p.0,015			1	Eurofins	SFBA0-7	0.86	54.639276	18.452665	54.638477	18.456252	54.638217	18.456096	54.639017	18.452433
Robert Klawikowski	9	5	5_351_w2	86/18/906	5_351	2018-03-27	2018-05-16	Tetrachlorwinfos	mg/kg	0.015	p.0,015			1	Eurofins	SFBA0-7	0.86	54.639276	18.452665	54.638477	18.456252	54.638217	18.456096	54.639017	18.452433
Robert Klawikowski	9	5	5_351_w2	86/18/906	5_351	2018-03-27	2018-05-16	Tetrakonazol	mg/kg	0.075	p.0,075			1	Eurofins	SFBA0-7	0.86	54.639276	18.452665	54.638477	18.456252	54.638217	18.456096	54.639017	18.452433
Robert Klawikowski	9	5	5_351_w2	86/18/906	5_351	2018-03-27	2018-05-16	Tetradifon	mg/kg	0.015	p.0,015			1	Eurofins	SFBA0-7	0.86	54.639276	18.452665	54.638477	18.456252	54.638217	18.456096	54.639017	18.452433
Robert Klawikowski	9	5	5_351_w2	86/18/906	5_351	2018-03-27	2018-05-16	Tetrametryna	mg/kg	0.03	p.0,03			1	Eurofins	SFBA0-7	0.86	54.639276	18.452665	54.638477	18.456252	54.638217	18.456096	54.639017	18.452433
Robert Klawikowski	9	5	5_351_w2	86/18/906	5_351	2018-03-27	2018-05-16	Tetrasul	mg/kg	0.03	p.0,03			1	Eurofins	SFBA0-7	0.86	54.639276	18.452665	54.638477	18.456252	54.638217	18.456096	54.639017	18.452433
Robert Klawikowski	9	5	5_351_w2	86/18/906	5_351	2018-03-27	2018-05-16	Tolklofos metylu	mg/kg	0.03	p.0,03			1	Eurofins	SFBA0-7	0.86	54.639276	18.452665	54.638477	18.456252	54.638217	18.456096	54.639017	18.452433
Robert Klawikowski	9	5	5_351_w2	86/18/906	5_351	2018-03-27	2018-05-16	Tolilofluanid	mg/kg	0.03	p.0,03			1	Eurofins	SFBA0-7	0.86	54.639276	18.452665	54.638477	18.456252	54.638217	18.456096	54.639017	18.452433
Robert Klawikowski	9	5	5_351_w2	86/18/906	5_351	2018-03-27	2018-05-16	Toxaphene Parlar 26	mg/kg	0.01	p.0,01			1	Eurofins	SFBA0-7	0.86	54.639276	18.452665	54.638477	18.456252	54.638217	18.456096	54.639017	18.452433
Robert Klawikowski	9	5	5_351_w2	86/18/906	5_351	2018-03-27	2018-05-16	Toxaphene Parlar 50	mg/kg	0.01	p.0,01			1	Eurofins	SFBA0-7	0.86	54.639276	18.452665	54.638477	18.456252	54.638217	18.456096	54.639017	18.452433
Robert Klawikowski	9	5	5_351_w2	86/18/906	5_351	2018-03-27	2018-05-16	Toxaphene Parlar 62	mg/kg	0.01	p.0,01			1	Eurofins	SFBA0-7	0.86	54.639276	18.452665	54.638477	18.456252	54.638217	18.456096	54.639017	18.452433
Robert Klawikowski	9	5	5_351_w2	86/18/906	5_351	2018-03-27	2018-05-16	Transfluthrin	mg/kg	0.03	p.0,03			1	Eurofins	SFBA0-7	0.86	54.639276	18.452665	54.638477	18.456252	54.638217	18.456096	54.639017	18.452433
Robert Klawikowski	9	5	5_351_w2	86/18/906	5_351	2018-03-27	2018-05-16	Triadimefon	mg/kg	0.03	p.0,03			1	Eurofins	SFBA0-7	0.86	54.639276	18.452665	54.638477	18.456252	54.638217	18.456096	54.639017	18.452433
Robert Klawikowski	9	5	5_351_w2	86/18/906	5_351	2018-03-27	2018-05-16	Triadimenol	mg/kg	0.15	p.0,15			1	Eurofins	SFBA0-7	0.86	54.639276	18.452665	54.638477	18.456252	54.638217	18.456096	54.639017	18.452433
Robert Klawikowski	9	5	5_351_w2	86/18/906	5_351	2018-03-27	2018-05-16	Triadimenol/Triadimefon(suma)	mg/kg	0.15	p.0,15			1	Eurofins	SFBA0-7	0.86	54.639276	18.452665	54.638477	18.456252	54.638217	18.456096	54.639017	18.452433
Robert Klawikowski	9	5	5_351_w2	86/18/906	5_351	2018-03-27	2018-05-16	Trialat	mg/kg	0.03	p.0,03			1	Eurofins	SFBA0-7	0.86	54.639276	18.452665	54.638477	18.456252	54.638217	18.456096	54.639017	18.452433
Robert Klawikowski	9	5	5_351_w2	86/18/906	5_351	2018-03-27	2018-05-16	Triamiphos	mg/kg	0.075	p.0,075			1	Eurofins	SFBA0-7	0.86	54.639276	18.452665	54.638477	18.456252	54.638217	18.456096	54.639017	18.452433
Robert Klawikowski	9	5	5_351_w2	86/18/906	5_351	2018-03-27	2018-05-16	Triazofos	mg/kg	0.06	p.0,06			1	Eurofins	SFBA0-7	0.86	54.639276	18.452665	54.638477	18.456252	54.638217	18.456096	54.639017	18.452433
Robert Klawikowski	9	5	5_351_w2	86/18/906	5_351	2018-03-27	2018-05-16	Tribufos	mg/kg	0.03	p.0,03			1	Eurofins	SFBA0-7	0.86	54.639276	18.452665	54.638477	18.456252	54.638217	18.456096	54.639017	18.452433
Robert Klawikowski	9	5	5_351_w2	86/18/906	5_351	2018-03-27	2018-05-16	Trichloronat	mg/kg	0.015	p.0,015			1	Eurofins	SFBA0-7	0.86	54.639276	18.452665	54.638477	18.456252	54.638217	18.456096	54.639017	18.452433
Robert Klawikowski	9	5	5_351_w2	86/18/906	5_351	2018-03-27	2018-05-16	Tridiphane	mg/kg	0.15	p.0,15			1	Eurofins	SFBA0-7	0.86	54.639276	18.452665	54.638477	18.456252	54.638217	18.456096	54.639017	18.452433
Robert Klawikowski	9	5	5_351_w2	86/18/906	5_351	2018-03-27	2018-05-16	Trifloksystrobina	mg/kg	0.03	p.0,03			1	Eurofins	SFBA0-7	0.86	54.639276	18.452665	54.638477	18.456252	54.638217	18.456096	54.639017	18.452433
Robert Klawikowski	9	5	5_351_w2	86/18/906	5_351	2018-03-27	2018-05-16	Trifluralina	mg/kg	0.015	p.0,015			1	Eurofins	SFBA0-7	0.86	54.639276	18.452665	54.638477	18.456252	54.638217	18.456096	54.639017	18.452433
Robert Klawikowski	9	5	5_351_w2	86/18/906	5_351	2018-03-27	2018-05-16	Vamidothion	mg/kg	0.03	p.0,03			1	Eurofins	SFBA0-7	0.86	54.639276	18.452665	54.638477	18.456252	54.638217	18.456096	54.639017	18.452433
Robert Klawikowski	9	5	5_351_w2	86/18/906	5_351	2018-03-27	2018-05-16	Winklozolina	mg/kg	0.015	p.0,015			1	Eurofins	SFBA0-7	0.86	54.639276	18.452665	54.638477	18.456252	54.638217	18.456096	54.639017	18.452433
Michał Korthals	8	19	19_44/2_w2	86/18/1029	19_44/2	2018-04-05	2018-05-16	2,4,5-T-Methylester	mg/kg	0.03	p.0,03		-	1	Eurofins	SFBA0-7	3.51	54.695007	18.422677	54.693555	18.426393	54.691556	18.425256	54.693084	18.419877
Michał Korthals	8	19	19_44/2_w2	86/18/1029	19_44/2	2018-04-05	2018-05-16	2,4-D-Methylester	mg/kg	0.03	p.0,03		-	1	Eurofins	SFBA0-7	3.51	54.695007	18.422677	54.693555	18.426393	54.691556	18.425256	54.693084	18.419877
Michał Korthals	8	19	19_44/2_w2	86/18/1029	19_44/2	2018-04-05	2018-05-16	Acetochlor	mg/kg	0.15	p.0,15		-	1	Eurofins	SFBA0-7	3.51	54.695007	18.422677	54.693555	18.426393	54.691556	18.425256	54.693084	18.419877
Michał Korthals	8	19	19_44/2_w2	86/18/1029	19_44/2	2018-04-05	2018-05-16	Aclonifen	mg/kg	0.06	p.0,06		-	1	Eurofins	SFBA0-7	3.51	54.695007	18.422677	54.693555	18.426393	54.691556	18.425256	54.693084	18.419877
Michał Korthals	8	19	19_44/2_w2	86/18/1029	19_44/2	2018-04-05	2018-05-16	Akrynatryna	mg/kg	0.03	p.0,03		-	1	Eurofins	SFBA0-7	3.51	54.695007	18.422677	54.693555	18.426393	54.691556	18.425256	54.693084	18.419877
Michał Korthals	8	19	19_44/2_w2	86/18/1029	19_44/2	2018-04-05	2018-05-16	Alachlor	mg/kg	0.03	p.0,03		-	1	Eurofins	SFBA0-7	3.51	54.695007	18.422677	54.693555	18.426393	54.691556	18.425256	54.693084	18.419877
Michał Korthals	8	19	19_44/2_w2	86/18/1029	19_44/2	2018-04-05	2018-05-16	Aldryna	mg/kg	0.015	p.0,015		-	1	Eurofins	SFBA0-7	3.51	54.695007	18.422677	54.693555	18.426393	54.691556	18.425256	54.693084	18.419877
Michał Korthals	8	19	19_44/2_w2	86/18/1029	19_44/2	2018-04-05	2018-05-16	Aldryna+Dieldryna	mg/kg	0.015	p.0,015		-	1	Eurofins	SFBA0-7	3.51	54.695007	18.422677	54.693555	18.426393	54.691556	18.425256	54.693084	18.419877
Michał Korthals	8	19	19_44/2_w2	86/18/1029	19_44/2	2018-04-05	2018-05-16	Alletryna	mg/kg	0.03	p.0,03		-	1	Eurofins	SFBA0-7	3.51	54.695007	18.422677	54.693555	18.426393	54.691556	18.425256	54.693084	18.419877
Michał Korthals	8	19	19_44/2_w2	86/18/1029	19_44/2	2018-04-05	2018-05-16	Amidithion	mg/kg	0.03	p.0,03		-	1	Eurofins	SFBA0-7	3.51	54.695007	18.422677	54.693555	18.426393	54.691556	18.425256	54.693084	18.419877
Michał Korthals	8	19	19_44/2_w2	86/18/1029	19_44/2	2018-04-05	2018-05-16	Antrachinon	mg/kg	0.06	p.0,06		-	1	Eurofins	SFBA0-7	3.51	54.695007	18.422677	54.693555	18.426393	54.691556	18.425256	54.693084	18.419877
Michał Korthals	8	19	19_44/2_w2	86/18/1029	19_44/2	2018-04-05	2018-05-16	Atrazyna	mg/kg	0.15	p.0,15		-	1	Eurofins	SFBA0-7	3.51	54.695007	18.422677	54.693555	18.426393	54.691556	18.425256	54.693084	18.419877
Michał Korthals	8	19	19_44/2_w2	86/18/1029	19_44/2	2018-04-05	2018-05-16	Azakonazol	mg/kg	0.03	p.0,03		-	1	Eurofins	SFBA0-7	3.51	54.695007	18.422677	54.693555	18.426393	54.691556	18.425256	54.693084	18.419877
Michał Korthals	8	19	19_44/2_w2	86/18/1029	19_44/2	2018-04-05	2018-05-16	Azynofos etylowy	mg/kg	0.03	p.0,03		-	1	Eurofins	SFBA0-7	3.51	54.695007	18.422677	54.693555	18.426393	54.691556	18.425256	54.693084	18.419877
Michał Korthals	8	19	19_44/2_w2	86/18/1029	19_44/2	2018-04-05	2018-05-16	Azynofos metylowy	mg/kg	0.03	p.0,03		-	1	Eurofins	SFBA0-7	3.51	54.695007	18.422677	54.693555	18.426393	54.691556	18.425256	54.693084	18.419877
Michał Korthals	8	19	19_44/2_w2	86/18/1029	19_44/2	2018-04-05	2018-05-16	Azoksystrobina	mg/kg	0.03	p.0,03		-	1	Eurofins	SFBA0-7	3.51	54.695007	18.422677	54.693555	18.426393	54.691556	18.425256	54.693084	18.419877
Michał Korthals	8	19	19_44/2_w2	86/18/1029	19_44/2	2018-04-05	2018-05-16	Benfluralin	mg/kg	0.015	p.0,015		-	1	Eurofins	SFBA0-7	3.51	54.695007	18.422677	54.693555	18.426393	54.691556	18.425256	54.693084	18.419877
Michał Korthals	8	19	19_44/2_w2	86/18/1029	19_44/2	2018-04-05	2018-05-16	Benoxacor	mg/kg	0.03	p.0,03		-	1	Eurofins	SFBA0-7	3.51	54.695007	18.422677	54.693555	18.426393	54.691556	18.425256	54.693084	18.419877
Michał Korthals	8	19	19_44/2_w2	86/18/1029	19_44/2	2018-04-05	2018-05-16	Benzoylprop-ethyl	mg/kg	0.15	p.0,15		-	1	Eurofins	SFBA0-7	3.51	54.695007	18.422677	54.693555	18.426393	54.691556	18.425256	54.693084	18.419877
Michał Korthals	8	19	19_44/2_w2	86/18/1029	19_44/2	2018-04-05	2018-05-16	Biofenox	mg/kg	0.03	p.0,03		-	1	Eurofins	SFBA0-7	3.51	54.695007	18.422677	54.693555	18.426393	54.691556	18.425256	54.693084	18.419877
Michał Korthals	8	19	19_44/2_w2	86/18/1029	19_44/2	2018-04-05	2018-05-16	Binapacryl	mg/kg	0.015	p.0,015		-	1	Eurofins	SFBA0-7	3.51	54.695007	18.422677	54.693555	18.426393	54.691556	18.425256	54.693084	18.419877
Michał Korthals	8	19	19_44/2_w2	86/18/1029	19_44/2	2018-04-05	2018-05-16	Bifentryna	mg/kg	0.06	p.0,06		-	1	Eurofins	SFBA0-7	3.51	54.695007	18.422677	54.693555	18.426393	54.691556	18.425256	54.693084	18.419877
Michał Korthals	8	19	19_44/2_w2	86/18/1029	19_44/2	2018-04-05	2018-05-16	Bitertanol	mg/kg	0.15	p.0,15		-	1	Eurofins	SFBA0-7	3.51	54.695007	18.422677	54.693555	18.426393	54.691556	18.425256	54.693084	18.419877
Michał Korthals	8	19	19_44/2_w2	86/18/1029	19_44/2	2018-04-05	2018-05-16	Boskalid	mg/kg	0.09	p.0,09		-	1	Eurofins	SFBA0-7	3.51	54.695007	18.422677	54.693555	18.426393	54.691556	18.425256	54.693084	18.419877
Michał Korthals	8	19	19_44/2_w2	86/18/1029	19_44/2	2018-04-05	2018-05-16	Bromofenvinphos	mg/kg	0.03	p.0,03		-	1	Eurofins	SFBA0-7	3.51	54.695007	18.422677	54.693555	18.426393	54.691556	18.425256	54.693084	18.419877
Michał Korthals	8	19	19_44/2_w2	86/18/1029	19_44/2	2018-04-05	2018-05-16	Bromocyclen	mg/kg	0.03	p.0,03		-	1	Eurofins	SFBA0-7	3.51	54.695007	18.422677	54.693555	18.426393	54.691556	18.425256	54.693084	18.419877
Michał Korthals	8	19	19_44/2_w2	86/18/1029	19_44/2	2018-04-05	2018-05-16	Bromofos metylowy	mg/kg	0.015	p.0,015		-	1	Eurofins	SFBA0-7	3.51	54.695007	18.422677	54.693555	18.426393	54.691556	18.425256	54.693084	18.419877
Michał Korthals	8	19	19_44/2_w2	86/18/1029	19_44/2	2018-04-05	2018-05-16	Bromofos etylowy	mg/kg	0.015	p.0,015		-	1	Eurofins	SFBA0-7	3.51	54.695007	18.422677	54.693555	18.426393	54.691556	18.425256	54.693084	18.419877
Michał Korthals	8	19	19_44/2_w2	86/18/1029	19_44/2	2018-04-05	2018-05-16	Bromopropylat	mg/kg	0.03	p.0,03		-	1	Eurofins	SFBA0-7	3.51	54.695007	18.422677	54.693555	18.426393	54.691556	18.425256	54.693084	18.419877
Michał Korthals	8	19	19_44/2_w2	86/18/1029	19_44/2	2018-04-05	2018-05-16	Buprofezyna	mg/kg	0.15	p.0,15		-	1	Eurofins	SFBA0-7	3.51	54.695007	18.422677	54.693555	18.426393	54.691556	18.425256	54.693084	18.419877
Michał Korthals	8	19	19_44/2_w2	86/18/1029	19_44/2	2018-04-05	2018-05-16	Butachlor	mg/kg	0.03	p.0,03		-	1	Eurofins	SFBA0-7	3.51	54.695007	18.422677	54.693555	18.426393	54.691556	18.425256	54.693084	18.419877
Michał Korthals	8	19	19_44/2_w2	86/18/1029	19_44/2	2018-04-05	2018-05-16	Butamifos	mg/kg	0.015	p.0,015		-	1	Eurofins	SFBA0-7	3.51	54.695007	18.422677	54.693555	18.426393	54.691556	18.425256	54.693084	18.419877
Michał Korthals	8	19	19_44/2_w2	86/18/1029	19_44/2	2018-04-05	2018-05-16	Butralin	mg/kg	0.03	p.0,03		-	1	Eurofins	SFBA0-7	3.51	54.695007	18.422677	54.693555	18.426393	54.691556	18.425256	54.693084	18.419877
Michał Korthals	8	19	19_44/2_w2	86/18/1029	19_44/2	2018-04-05	2018-05-16	Kadusafos	mg/kg	0.03	p.0,03		-	1	Eurofins	SFBA0-7	3.51	54.695007	18.422677	54.693555	18.426393	54.691556	18.425256	54.693084	18.419877
Michał Korthals	8	19	19_44/2_w2	86/18/1029	19_44/2	2018-04-05	2018-05-16	Kaptafol	mg/kg	0.03	p.0,03		-	1	Eurofins	SFBA0-7	3.51	54.695007	18.422677	54.693555	18.426393	54.691556	18.425256	54.693084	18.419877
Michał Korthals	8	19	19_44/2_w2	86/18/1029	19_44/2	2018-04-05	2018-05-16	Kaptan	mg/kg	0.03	p.0,03		-	1	Eurofins	SFBA0-7	3.51	54.695007	18.422677	54.693555	18.426393	54.691556	18.425256	54.693084	18.419877
Michał Korthals	8	19	19_44/2_w2	86/18/1029	19_44/2	2018-04-05	2018-05-16	Karbofenotion	mg/kg	0.015	p.0,015		-	1	Eurofins	SFBA0-7	3.51	54.695007	18.422677	54.693555	18.426393	54.691556	18.425256	54.693084	18.419877
Michał Korthals	8	19	19_44/2_w2	86/18/1029	19_44/2	2018-04-05	2018-05-16	Carbophenothion-methyl	mg/kg	0.03	p.0,03		-	1	Eurofins	SFBA0-7	3.51	54.695007	18.422677	54.693555	18.426393	54.691556	18.425256	54.693084	18.419877
Michał Korthals	8	19	19_44/2_w2	86/18/1029	19_44/2	2018-04-05	2018-05-16	Carfentrazone-ethyl	mg/kg	0.03	p.0,03		-	1	Eurofins	SFBA0-7	3.51	54.695007	18.422677	54.693555	18.426393	54.691556	18.425256	54.693084	18.419877
Michał Korthals	8	19	19_44/2_w2	86/18/1029	19_44/2	2018-04-05	2018-05-16	Chinometionat	mg/kg	0.015	p.0,015		-	1	Eurofins	SFBA0-7	3.51	54.695007	18.422677	54.693555	18.426393	54.691556	18.425256	54.693084	18.419877
Michał Korthals	8	19	19_44/2_w2	86/18/1029	19_44/2	2018-04-05	2018-05-16	Chlorbenzyd	mg/kg	0.015	p.0,015		-	1	Eurofins	SFBA0-7	3.51	54.695007	18.422677	54.693555	18.426393	54.691556	18.425256	54.693084	18.419877
Michał Korthals	8	19	19_44/2_w2	86/18/1029	19_44/2	2018-04-05	2018-05-16	Chlordane (total)	mg/kg	0.03	p.0,03		-	1	Eurofins	SFBA0-7	3.51	54.695007	18.422677	54.693555	18.426393	54.691556	18.425256	54.693084	18.419877
Michał Korthals	8	19	19_44/2_w2	86/18/1029	19_44/2	2018-04-05	2018-05-16	Chlordan,cis-	mg/kg	0.015	p.0,015		-	1	Eurofins	SFBA0-7	3.51	54.695007	18.422677	54.693555	18.426393	54.691556	18.425256	54.693084	18.419877
Michał Korthals	8	19	19_44/2_w2	86/18/1029	19_44/2	2018-04-05	2018-05-16	Chlordan,oxy-	mg/kg	0.03	p.0,03		-	1	Eurofins	SFBA0-7	3.51	54.695007	18.422677	54.693555	18.426393	54.691556	18.425256	54.693084	18.419877
Michał Korthals	8	19	19_44/2_w2	86/18/1029	19_44/2	2018-04-05	2018-05-16	Chlordan,gamma/trans-	mg/kg	0.015	p.0,015		-	1	Eurofins	SFBA0-7	3.51	54.695007	18.422677	54.693555	18.426393	54.691556	18.425256	54.693084	18.419877
Michał Korthals	8	19	19_44/2_w2	86/18/1029	19_44/2	2018-04-05	2018-05-16	Chlordecon	mg/kg	0.03	p.0,03		-	1	Eurofins	SFBA0-7	3.51	54.695007	18.422677	54.693555	18.426393	54.691556	18.425256	54.693084	18.419877
Michał Korthals	8	19	19_44/2_w2	86/18/1029	19_44/2	2018-04-05	2018-05-16	Chlorethoksyfos	mg/kg	0.015	p.0,015		-	1	Eurofins	SFBA0-7	3.51	54.695007	18.422677	54.693555	18.426393	54.691556	18.425256	54.693084	18.419877
Michał Korthals	8	19	19_44/2_w2	86/18/1029	19_44/2	2018-04-05	2018-05-16	Chlorfenapyr	mg/kg	0.015	p.0,015		-	1	Eurofins	SFBA0-7	3.51	54.695007	18.422677	54.693555	18.426393	54.691556	18.425256	54.693084	18.419877
Michał Korthals	8	19	19_44/2_w2	86/18/1029	19_44/2	2018-04-05	2018-05-16	Chlorfenprop-methyl	mg/kg	0.03	p.0,03		-	1	Eurofins	SFBA0-7	3.51	54.695007	18.422677	54.693555	18.426393	54.691556	18.425256	54.693084	18.419877
Michał Korthals	8	19	19_44/2_w2	86/18/1029	19_44/2	2018-04-05	2018-05-16	Chlorfenson	mg/kg	0.015	p.0,015		-	1	Eurofins	SFBA0-7	3.51	54.695007	18.422677	54.693555	18.426393	54.691556	18.425256	54.693084	18.419877
Michał Korthals	8	19	19_44/2_w2	86/18/1029	19_44/2	2018-04-05	2018-05-16	Chlorfenwinfos	mg/kg	0.03	p.0,03		-	1	Eurofins	SFBA0-7	3.51	54.695007	18.422677	54.693555	18.426393	54.691556	18.425256	54.693084	18.419877
Michał Korthals	8	19	19_44/2_w2	86/18/1029	19_44/2	2018-04-05	2018-05-16	Chloridazon	mg/kg	0.03	p.0,03		-	1	Eurofins	SFBA0-7	3.51	54.695007	18.422677	54.693555	18.426393	54.691556	18.425256	54.693084	18.419877
Michał Korthals	8	19	19_44/2_w2	86/18/1029	19_44/2	2018-04-05	2018-05-16	Chlormephos	mg/kg	0.015	p.0,015		-	1	Eurofins	SFBA0-7	3.51	54.695007	18.422677	54.693555	18.426393	54.691556	18.425256	54.693084	18.419877
Michał Korthals	8	19	19_44/2_w2	86/18/1029	19_44/2	2018-04-05	2018-05-16	Chlorobenzylat	mg/kg	0.015	p.0,015		-	1	Eurofins	SFBA0-7	3.51	54.695007	18.422677	54.693555	18.426393	54.691556	18.425256	54.693084	18.419877
Michał Korthals	8	19	19_44/2_w2	86/18/1029	19_44/2	2018-04-05	2018-05-16	Chloroneb	mg/kg	0.03	p.0,03		-	1	Eurofins	SFBA0-7	3.51	54.695007	18.422677	54.693555	18.426393	54.691556	18.425256	54.693084	18.419877
Michał Korthals	8	19	19_44/2_w2	86/18/1029	19_44/2	2018-04-05	2018-05-16	Chloropropylat	mg/kg	0.015	p.0,015		-	1	Eurofins	SFBA0-7	3.51	54.695007	18.422677	54.693555	18.426393	54.691556	18.425256	54.693084	18.419877
Michał Korthals	8	19	19_44/2_w2	86/18/1029	19_44/2	2018-04-05	2018-05-16	Chlorotalonil	mg/kg	0.015	p.0,015		-	1	Eurofins	SFBA0-7	3.51	54.695007	18.422677	54.693555	18.426393	54.691556	18.425256	54.693084	18.419877
Michał Korthals	8	19	19_44/2_w2	86/18/1029	19_44/2	2018-04-05	2018-05-16	Chlorpiryfos etylowy	mg/kg	0.015	0.093	±	0.047	0	Eurofins	SFBA0-7	3.51	54.695007	18.422677	54.693555	18.426393	54.691556	18.425256	54.693084	18.419877
Michał Korthals	8	19	19_44/2_w2	86/18/1029	19_44/2	2018-04-05	2018-05-16	Chlorpiryfos metylowy	mg/kg	0.015	p.0,015		-	1	Eurofins	SFBA0-7	3.51	54.695007	18.422677	54.693555	18.426393	54.691556	18.425256	54.693084	18.419877
Michał Korthals	8	19	19_44/2_w2	86/18/1029	19_44/2	2018-04-05	2018-05-16	Chlorthal-dimethyl	mg/kg	0.015	p.0,015		-	1	Eurofins	SFBA0-7	3.51	54.695007	18.422677	54.693555	18.426393	54.691556	18.425256	54.693084	18.419877
Michał Korthals	8	19	19_44/2_w2	86/18/1029	19_44/2	2018-04-05	2018-05-16	Chlorotion	mg/kg	0.03	p.0,03		-	1	Eurofins	SFBA0-7	3.51	54.695007	18.422677	54.693555	18.426393	54.691556	18.425256	54.693084	18.419877
Michał Korthals	8	19	19_44/2_w2	86/18/1029	19_44/2	2018-04-05	2018-05-16	Chlortiofos	mg/kg	0.015	p.0,015		-	1	Eurofins	SFBA0-7	3.51	54.695007	18.422677	54.693555	18.426393	54.691556	18.425256	54.693084	18.419877
Michał Korthals	8	19	19_44/2_w2	86/18/1029	19_44/2	2018-04-05	2018-05-16	Chlozolinate	mg/kg	0.03	p.0,03		-	1	Eurofins	SFBA0-7	3.51	54.695007	18.422677	54.693555	18.426393	54.691556	18.425256	54.693084	18.419877
Michał Korthals	8	19	19_44/2_w2	86/18/1029	19_44/2	2018-04-05	2018-05-16	Cinidon-ethyl	mg/kg	0.03	p.0,03		-	1	Eurofins	SFBA0-7	3.51	54.695007	18.422677	54.693555	18.426393	54.691556	18.425256	54.693084	18.419877
Michał Korthals	8	19	19_44/2_w2	86/18/1029	19_44/2	2018-04-05	2018-05-16	Clodinafop-propargyl	mg/kg	0.09	p.0,09		-	1	Eurofins	SFBA0-7	3.51	54.695007	18.422677	54.693555	18.426393	54.691556	18.425256	54.693084	18.419877
Michał Korthals	8	19	19_44/2_w2	86/18/1029	19_44/2	2018-04-05	2018-05-16	Kumafos	mg/kg	0.015	p.0,015		-	1	Eurofins	SFBA0-7	3.51	54.695007	18.422677	54.693555	18.426393	54.691556	18.425256	54.693084	18.419877
Michał Korthals	8	19	19_44/2_w2	86/18/1029	19_44/2	2018-04-05	2018-05-16	Crotoxyphos	mg/kg	0.03	p.0,03		-	1	Eurofins	SFBA0-7	3.51	54.695007	18.422677	54.693555	18.426393	54.691556	18.425256	54.693084	18.419877
Michał Korthals	8	19	19_44/2_w2	86/18/1029	19_44/2	2018-04-05	2018-05-16	Cyjanofenfos	mg/kg	0.03	p.0,03		-	1	Eurofins	SFBA0-7	3.51	54.695007	18.422677	54.693555	18.426393	54.691556	18.425256	54.693084	18.419877
Michał Korthals	8	19	19_44/2_w2	86/18/1029	19_44/2	2018-04-05	2018-05-16	Cyanophos	mg/kg	0.03	p.0,03		-	1	Eurofins	SFBA0-7	3.51	54.695007	18.422677	54.693555	18.426393	54.691556	18.425256	54.693084	18.419877
Michał Korthals	8	19	19_44/2_w2	86/18/1029	19_44/2	2018-04-05	2018-05-16	Cyflutryna	mg/kg	0.03	p.0,03		-	1	Eurofins	SFBA0-7	3.51	54.695007	18.422677	54.693555	18.426393	54.691556	18.425256	54.693084	18.419877
Michał Korthals	8	19	19_44/2_w2	86/18/1029	19_44/2	2018-04-05	2018-05-16	lambda-Cyhalotryna	mg/kg	0.03	p.0,03		-	1	Eurofins	SFBA0-7	3.51	54.695007	18.422677	54.693555	18.426393	54.691556	18.425256	54.693084	18.419877
Michał Korthals	8	19	19_44/2_w2	86/18/1029	19_44/2	2018-04-05	2018-05-16	Cypermetryna	mg/kg	0.015	p.0,015		-	1	Eurofins	SFBA0-7	3.51	54.695007	18.422677	54.693555	18.426393	54.691556	18.425256	54.693084	18.419877
Michał Korthals	8	19	19_44/2_w2	86/18/1029	19_44/2	2018-04-05	2018-05-16	Cyphenothrin	mg/kg	0.03	p.0,03		-	1	Eurofins	SFBA0-7	3.51	54.695007	18.422677	54.693555	18.426393	54.691556	18.425256	54.693084	18.419877
Michał Korthals	8	19	19_44/2_w2	86/18/1029	19_44/2	2018-04-05	2018-05-16	Cyprokonazol	mg/kg	0.12	p.0,12		-	1	Eurofins	SFBA0-7	3.51	54.695007	18.422677	54.693555	18.426393	54.691556	18.425256	54.693084	18.419877
Michał Korthals	8	19	19_44/2_w2	86/18/1029	19_44/2	2018-04-05	2018-05-16	DDD-o,p	mg/kg	0.015	p.0,015		-	1	Eurofins	SFBA0-7	3.51	54.695007	18.422677	54.693555	18.426393	54.691556	18.425256	54.693084	18.419877
Michał Korthals	8	19	19_44/2_w2	86/18/1029	19_44/2	2018-04-05	2018-05-16	DDE-o,p	mg/kg	0.015	p.0,015		-	1	Eurofins	SFBA0-7	3.51	54.695007	18.422677	54.693555	18.426393	54.691556	18.425256	54.693084	18.419877
Michał Korthals	8	19	19_44/2_w2	86/18/1029	19_44/2	2018-04-05	2018-05-16	DDT(p,p'-DDT+o,p'-DDT+p.p'-DDE+p,p'-TDE)	mg/kg	0.015	p.0,015		-	1	Eurofins	SFBA0-7	3.51	54.695007	18.422677	54.693555	18.426393	54.691556	18.425256	54.693084	18.419877
Michał Korthals	8	19	19_44/2_w2	86/18/1029	19_44/2	2018-04-05	2018-05-16	Deltametryna	mg/kg	0.015	p.0,015		-	1	Eurofins	SFBA0-7	3.51	54.695007	18.422677	54.693555	18.426393	54.691556	18.425256	54.693084	18.419877
Michał Korthals	8	19	19_44/2_w2	86/18/1029	19_44/2	2018-04-05	2018-05-16	Dialifos	mg/kg	0.03	p.0,03		-	1	Eurofins	SFBA0-7	3.51	54.695007	18.422677	54.693555	18.426393	54.691556	18.425256	54.693084	18.419877
Michał Korthals	8	19	19_44/2_w2	86/18/1029	19_44/2	2018-04-05	2018-05-16	Di-allate	mg/kg	0.03	p.0,03		-	1	Eurofins	SFBA0-7	3.51	54.695007	18.422677	54.693555	18.426393	54.691556	18.425256	54.693084	18.419877
Michał Korthals	8	19	19_44/2_w2	86/18/1029	19_44/2	2018-04-05	2018-05-16	Diazynon	mg/kg	0.03	p.0,03		-	1	Eurofins	SFBA0-7	3.51	54.695007	18.422677	54.693555	18.426393	54.691556	18.425256	54.693084	18.419877
Michał Korthals	8	19	19_44/2_w2	86/18/1029	19_44/2	2018-04-05	2018-05-16	4,4-Dibromobenzophenone	mg/kg	0.03	p.0,03		-	1	Eurofins	SFBA0-7	3.51	54.695007	18.422677	54.693555	18.426393	54.691556	18.425256	54.693084	18.419877
Michał Korthals	8	19	19_44/2_w2	86/18/1029	19_44/2	2018-04-05	2018-05-16	Dicapthon	mg/kg	0.03	p.0,03		-	1	Eurofins	SFBA0-7	3.51	54.695007	18.422677	54.693555	18.426393	54.691556	18.425256	54.693084	18.419877
Michał Korthals	8	19	19_44/2_w2	86/18/1029	19_44/2	2018-04-05	2018-05-16	Dichlobenil	mg/kg	0.15	p.0,15		-	1	Eurofins	SFBA0-7	3.51	54.695007	18.422677	54.693555	18.426393	54.691556	18.425256	54.693084	18.419877
Michał Korthals	8	19	19_44/2_w2	86/18/1029	19_44/2	2018-04-05	2018-05-16	Dichlofention	mg/kg	0.03	p.0,03		-	1	Eurofins	SFBA0-7	3.51	54.695007	18.422677	54.693555	18.426393	54.691556	18.425256	54.693084	18.419877
Michał Korthals	8	19	19_44/2_w2	86/18/1029	19_44/2	2018-04-05	2018-05-16	Dichlofluanid	mg/kg	0.015	p.0,015		-	1	Eurofins	SFBA0-7	3.51	54.695007	18.422677	54.693555	18.426393	54.691556	18.425256	54.693084	18.419877
Michał Korthals	8	19	19_44/2_w2	86/18/1029	19_44/2	2018-04-05	2018-05-16	Dichloran	mg/kg	0.075	p.0,075		-	1	Eurofins	SFBA0-7	3.51	54.695007	18.422677	54.693555	18.426393	54.691556	18.425256	54.693084	18.419877
Michał Korthals	8	19	19_44/2_w2	86/18/1029	19_44/2	2018-04-05	2018-05-16	Dichlorfos	mg/kg	0.06	p.0,06		-	1	Eurofins	SFBA0-7	3.51	54.695007	18.422677	54.693555	18.426393	54.691556	18.425256	54.693084	18.419877
Michał Korthals	8	19	19_44/2_w2	86/18/1029	19_44/2	2018-04-05	2018-05-16	Diclofop-methyl	mg/kg	0.015	p.0,015		-	1	Eurofins	SFBA0-7	3.51	54.695007	18.422677	54.693555	18.426393	54.691556	18.425256	54.693084	18.419877
Michał Korthals	8	19	19_44/2_w2	86/18/1029	19_44/2	2018-04-05	2018-05-16	Dikofol (suma)	mg/kg	0.015	p.0,015		-	1	Eurofins	SFBA0-7	3.51	54.695007	18.422677	54.693555	18.426393	54.691556	18.425256	54.693084	18.419877
Michał Korthals	8	19	19_44/2_w2	86/18/1029	19_44/2	2018-04-05	2018-05-16	Dicofol,o,p-	mg/kg	0.015	p.0,015		-	1	Eurofins	SFBA0-7	3.51	54.695007	18.422677	54.693555	18.426393	54.691556	18.425256	54.693084	18.419877
Michał Korthals	8	19	19_44/2_w2	86/18/1029	19_44/2	2018-04-05	2018-05-16	Dicofol,p,p--	mg/kg	0.015	p.0,015		-	1	Eurofins	SFBA0-7	3.51	54.695007	18.422677	54.693555	18.426393	54.691556	18.425256	54.693084	18.419877
Michał Korthals	8	19	19_44/2_w2	86/18/1029	19_44/2	2018-04-05	2018-05-16	Dicrotophos	mg/kg	0.03	p.0,03		-	1	Eurofins	SFBA0-7	3.51	54.695007	18.422677	54.693555	18.426393	54.691556	18.425256	54.693084	18.419877
Michał Korthals	8	19	19_44/2_w2	86/18/1029	19_44/2	2018-04-05	2018-05-16	Dieldryna	mg/kg	0.015	p.0,015		-	1	Eurofins	SFBA0-7	3.51	54.695007	18.422677	54.693555	18.426393	54.691556	18.425256	54.693084	18.419877
Michał Korthals	8	19	19_44/2_w2	86/18/1029	19_44/2	2018-04-05	2018-05-16	Dienochlor	mg/kg	0.03	p.0,03		-	1	Eurofins	SFBA0-7	3.51	54.695007	18.422677	54.693555	18.426393	54.691556	18.425256	54.693084	18.419877
Michał Korthals	8	19	19_44/2_w2	86/18/1029	19_44/2	2018-04-05	2018-05-16	Difenokonazol	mg/kg	0.045	p.0,045		-	1	Eurofins	SFBA0-7	3.51	54.695007	18.422677	54.693555	18.426393	54.691556	18.425256	54.693084	18.419877
Michał Korthals	8	19	19_44/2_w2	86/18/1029	19_44/2	2018-04-05	2018-05-16	Diflufenican	mg/kg	0.03	p.0,03		-	1	Eurofins	SFBA0-7	3.51	54.695007	18.422677	54.693555	18.426393	54.691556	18.425256	54.693084	18.419877
Michał Korthals	8	19	19_44/2_w2	86/18/1029	19_44/2	2018-04-05	2018-05-16	Dimefox	mg/kg	0.15	p.0,15		-	1	Eurofins	SFBA0-7	3.51	54.695007	18.422677	54.693555	18.426393	54.691556	18.425256	54.693084	18.419877
Michał Korthals	8	19	19_44/2_w2	86/18/1029	19_44/2	2018-04-05	2018-05-16	Dimetrachlor	mg/kg	0.03	p.0,03		-	1	Eurofins	SFBA0-7	3.51	54.695007	18.422677	54.693555	18.426393	54.691556	18.425256	54.693084	18.419877
Michał Korthals	8	19	19_44/2_w2	86/18/1029	19_44/2	2018-04-05	2018-05-16	Dimethipine	mg/kg	0.03	p.0,03		-	1	Eurofins	SFBA0-7	3.51	54.695007	18.422677	54.693555	18.426393	54.691556	18.425256	54.693084	18.419877
Michał Korthals	8	19	19_44/2_w2	86/18/1029	19_44/2	2018-04-05	2018-05-16	Dimetoat	mg/kg	0.06	p.0,06		-	1	Eurofins	SFBA0-7	3.51	54.695007	18.422677	54.693555	18.426393	54.691556	18.425256	54.693084	18.419877
Michał Korthals	8	19	19_44/2_w2	86/18/1029	19_44/2	2018-04-05	2018-05-16	Dimetomorf	mg/kg	0.03	p.0,03		-	1	Eurofins	SFBA0-7	3.51	54.695007	18.422677	54.693555	18.426393	54.691556	18.425256	54.693084	18.419877
Michał Korthals	8	19	19_44/2_w2	86/18/1029	19_44/2	2018-04-05	2018-05-16	Dinikonazol	mg/kg	0.03	p.0,03		-	1	Eurofins	SFBA0-7	3.51	54.695007	18.422677	54.693555	18.426393	54.691556	18.425256	54.693084	18.419877
Michał Korthals	8	19	19_44/2_w2	86/18/1029	19_44/2	2018-04-05	2018-05-16	Dinitramine	mg/kg	0.03	p.0,03		-	1	Eurofins	SFBA0-7	3.51	54.695007	18.422677	54.693555	18.426393	54.691556	18.425256	54.693084	18.419877
Michał Korthals	8	19	19_44/2_w2	86/18/1029	19_44/2	2018-04-05	2018-05-16	Dinobuton	mg/kg	0.1	p.0,1		-	1	Eurofins	SFBA0-7	3.51	54.695007	18.422677	54.693555	18.426393	54.691556	18.425256	54.693084	18.419877
Michał Korthals	8	19	19_44/2_w2	86/18/1029	19_44/2	2018-04-05	2018-05-16	Disulfoton	mg/kg	0.03	p.0,03		-	1	Eurofins	SFBA0-7	3.51	54.695007	18.422677	54.693555	18.426393	54.691556	18.425256	54.693084	18.419877
Michał Korthals	8	19	19_44/2_w2	86/18/1029	19_44/2	2018-04-05	2018-05-16	Disulfoton-sulfon	mg/kg	0.03	p.0,03		-	1	Eurofins	SFBA0-7	3.51	54.695007	18.422677	54.693555	18.426393	54.691556	18.425256	54.693084	18.419877
Michał Korthals	8	19	19_44/2_w2	86/18/1029	19_44/2	2018-04-05	2018-05-16	Ditalimfos	mg/kg	0.015	p.0,015		-	1	Eurofins	SFBA0-7	3.51	54.695007	18.422677	54.693555	18.426393	54.691556	18.425256	54.693084	18.419877
Michał Korthals	8	19	19_44/2_w2	86/18/1029	19_44/2	2018-04-05	2018-05-16	Edifenphos	mg/kg	0.03	p.0,03		-	1	Eurofins	SFBA0-7	3.51	54.695007	18.422677	54.693555	18.426393	54.691556	18.425256	54.693084	18.419877
Michał Korthals	8	19	19_44/2_w2	86/18/1029	19_44/2	2018-04-05	2018-05-16	Endosulfan (suma izomerów)	mg/kg	0.015	p.0,015		-	1	Eurofins	SFBA0-7	3.51	54.695007	18.422677	54.693555	18.426393	54.691556	18.425256	54.693084	18.419877
Michał Korthals	8	19	19_44/2_w2	86/18/1029	19_44/2	2018-04-05	2018-05-16	alfa-Endosulfan	mg/kg	0.015	p.0,015		-	1	Eurofins	SFBA0-7	3.51	54.695007	18.422677	54.693555	18.426393	54.691556	18.425256	54.693084	18.419877
Michał Korthals	8	19	19_44/2_w2	86/18/1029	19_44/2	2018-04-05	2018-05-16	Siarczan endosulfanu	mg/kg	0.015	p.0,015		-	1	Eurofins	SFBA0-7	3.51	54.695007	18.422677	54.693555	18.426393	54.691556	18.425256	54.693084	18.419877
Michał Korthals	8	19	19_44/2_w2	86/18/1029	19_44/2	2018-04-05	2018-05-16	beta-Endosulfan	mg/kg	0.015	p.0,015		-	1	Eurofins	SFBA0-7	3.51	54.695007	18.422677	54.693555	18.426393	54.691556	18.425256	54.693084	18.419877
Michał Korthals	8	19	19_44/2_w2	86/18/1029	19_44/2	2018-04-05	2018-05-16	Endryna	mg/kg	0.015	p.0,015		-	1	Eurofins	SFBA0-7	3.51	54.695007	18.422677	54.693555	18.426393	54.691556	18.425256	54.693084	18.419877
Michał Korthals	8	19	19_44/2_w2	86/18/1029	19_44/2	2018-04-05	2018-05-16	Ketoendrin-delta	mg/kg	0.015	p.0,015		-	1	Eurofins	SFBA0-7	3.51	54.695007	18.422677	54.693555	18.426393	54.691556	18.425256	54.693084	18.419877
Michał Korthals	8	19	19_44/2_w2	86/18/1029	19_44/2	2018-04-05	2018-05-16	EPN	mg/kg	0.03	p.0,03		-	1	Eurofins	SFBA0-7	3.51	54.695007	18.422677	54.693555	18.426393	54.691556	18.425256	54.693084	18.419877
Michał Korthals	8	19	19_44/2_w2	86/18/1029	19_44/2	2018-04-05	2018-05-16	Epoksykonazol	mg/kg	0.12	p.0,12		-	1	Eurofins	SFBA0-7	3.51	54.695007	18.422677	54.693555	18.426393	54.691556	18.425256	54.693084	18.419877
Michał Korthals	8	19	19_44/2_w2	86/18/1029	19_44/2	2018-04-05	2018-05-16	Etaconazole	mg/kg	0.06	p.0,06		-	1	Eurofins	SFBA0-7	3.51	54.695007	18.422677	54.693555	18.426393	54.691556	18.425256	54.693084	18.419877
Michał Korthals	8	19	19_44/2_w2	86/18/1029	19_44/2	2018-04-05	2018-05-16	Ethalfluralin	mg/kg	0.03	p.0,03		-	1	Eurofins	SFBA0-7	3.51	54.695007	18.422677	54.693555	18.426393	54.691556	18.425256	54.693084	18.419877
Michał Korthals	8	19	19_44/2_w2	86/18/1029	19_44/2	2018-04-05	2018-05-16	Etion	mg/kg	0.015	p.0,015		-	1	Eurofins	SFBA0-7	3.51	54.695007	18.422677	54.693555	18.426393	54.691556	18.425256	54.693084	18.419877
Michał Korthals	8	19	19_44/2_w2	86/18/1029	19_44/2	2018-04-05	2018-05-16	Ethiprol	mg/kg	0.06	p.0,06		-	1	Eurofins	SFBA0-7	3.51	54.695007	18.422677	54.693555	18.426393	54.691556	18.425256	54.693084	18.419877
Michał Korthals	8	19	19_44/2_w2	86/18/1029	19_44/2	2018-04-05	2018-05-16	Etofumesat	mg/kg	0.15	p.0,15		-	1	Eurofins	SFBA0-7	3.51	54.695007	18.422677	54.693555	18.426393	54.691556	18.425256	54.693084	18.419877
Michał Korthals	8	19	19_44/2_w2	86/18/1029	19_44/2	2018-04-05	2018-05-16	Etoprofos	mg/kg	0.015	p.0,15		-	1	Eurofins	SFBA0-7	3.51	54.695007	18.422677	54.693555	18.426393	54.691556	18.425256	54.693084	18.419877
Michał Korthals	8	19	19_44/2_w2	86/18/1029	19_44/2	2018-04-05	2018-05-16	Etridiazole	mg/kg	0.015	p.0,15		-	1	Eurofins	SFBA0-7	3.51	54.695007	18.422677	54.693555	18.426393	54.691556	18.425256	54.693084	18.419877
Michał Korthals	8	19	19_44/2_w2	86/18/1029	19_44/2	2018-04-05	2018-05-16	Etrimfos	mg/kg	0.015	p.0,15		-	1	Eurofins	SFBA0-7	3.51	54.695007	18.422677	54.693555	18.426393	54.691556	18.425256	54.693084	18.419877
Michał Korthals	8	19	19_44/2_w2	86/18/1029	19_44/2	2018-04-05	2018-05-16	Famophos	mg/kg	0.03	p.0,03		-	1	Eurofins	SFBA0-7	3.51	54.695007	18.422677	54.693555	18.426393	54.691556	18.425256	54.693084	18.419877
Michał Korthals	8	19	19_44/2_w2	86/18/1029	19_44/2	2018-04-05	2018-05-16	Famoksadon	mg/kg	0.03	p.0,03		-	1	Eurofins	SFBA0-7	3.51	54.695007	18.422677	54.693555	18.426393	54.691556	18.425256	54.693084	18.419877
Michał Korthals	8	19	19_44/2_w2	86/18/1029	19_44/2	2018-04-05	2018-05-16	Fenamidon	mg/kg	0.06	p.0,06		-	1	Eurofins	SFBA0-7	3.51	54.695007	18.422677	54.693555	18.426393	54.691556	18.425256	54.693084	18.419877
Michał Korthals	8	19	19_44/2_w2	86/18/1029	19_44/2	2018-04-05	2018-05-16	Fenamifos (suma izomerów)	mg/kg	0.06	p.0,06		-	1	Eurofins	SFBA0-7	3.51	54.695007	18.422677	54.693555	18.426393	54.691556	18.425256	54.693084	18.419877
Michał Korthals	8	19	19_44/2_w2	86/18/1029	19_44/2	2018-04-05	2018-05-16	Fenarimol	mg/kg	0.15	p.0,15		-	1	Eurofins	SFBA0-7	3.51	54.695007	18.422677	54.693555	18.426393	54.691556	18.425256	54.693084	18.419877
Michał Korthals	8	19	19_44/2_w2	86/18/1029	19_44/2	2018-04-05	2018-05-16	Fenbukonazol	mg/kg	0.03	p.0,03		-	1	Eurofins	SFBA0-7	3.51	54.695007	18.422677	54.693555	18.426393	54.691556	18.425256	54.693084	18.419877
Michał Korthals	8	19	19_44/2_w2	86/18/1029	19_44/2	2018-04-05	2018-05-16	Fenchlorazole	mg/kg	0.03	p.0,03		-	1	Eurofins	SFBA0-7	3.51	54.695007	18.422677	54.693555	18.426393	54.691556	18.425256	54.693084	18.419877
Michał Korthals	8	19	19_44/2_w2	86/18/1029	19_44/2	2018-04-05	2018-05-16	Fenchlorofos	mg/kg	0.015	p.0,015		-	1	Eurofins	SFBA0-7	3.51	54.695007	18.422677	54.693555	18.426393	54.691556	18.425256	54.693084	18.419877
Michał Korthals	8	19	19_44/2_w2	86/18/1029	19_44/2	2018-04-05	2018-05-16	Fenfluthrine	mg/kg	0.03	p.0,03		-	1	Eurofins	SFBA0-7	3.51	54.695007	18.422677	54.693555	18.426393	54.691556	18.425256	54.693084	18.419877
Michał Korthals	8	19	19_44/2_w2	86/18/1029	19_44/2	2018-04-05	2018-05-16	Fenheksamid	mg/kg	0.15	p.0,15		-	1	Eurofins	SFBA0-7	3.51	54.695007	18.422677	54.693555	18.426393	54.691556	18.425256	54.693084	18.419877
Michał Korthals	8	19	19_44/2_w2	86/18/1029	19_44/2	2018-04-05	2018-05-16	Fenitrotion	mg/kg	0.015	p.0,015		-	1	Eurofins	SFBA0-7	3.51	54.695007	18.422677	54.693555	18.426393	54.691556	18.425256	54.693084	18.419877
Michał Korthals	8	19	19_44/2_w2	86/18/1029	19_44/2	2018-04-05	2018-05-16	Fenoxaprop-ethyl	mg/kg	0.15	p.0,15		-	1	Eurofins	SFBA0-7	3.51	54.695007	18.422677	54.693555	18.426393	54.691556	18.425256	54.693084	18.419877
Michał Korthals	8	19	19_44/2_w2	86/18/1029	19_44/2	2018-04-05	2018-05-16	Fenpiclonil	mg/kg	0.15	p.0,15		-	1	Eurofins	SFBA0-7	3.51	54.695007	18.422677	54.693555	18.426393	54.691556	18.425256	54.693084	18.419877
Michał Korthals	8	19	19_44/2_w2	86/18/1029	19_44/2	2018-04-05	2018-05-16	Fenpropatryna	mg/kg	0.015	p.0,015		-	1	Eurofins	SFBA0-7	3.51	54.695007	18.422677	54.693555	18.426393	54.691556	18.425256	54.693084	18.419877
Michał Korthals	8	19	19_44/2_w2	86/18/1029	19_44/2	2018-04-05	2018-05-16	Fenpropimorf	mg/kg	0.15	p.0,15		-	1	Eurofins	SFBA0-7	3.51	54.695007	18.422677	54.693555	18.426393	54.691556	18.425256	54.693084	18.419877
Michał Korthals	8	19	19_44/2_w2	86/18/1029	19_44/2	2018-04-05	2018-05-16	Fenson	mg/kg	0.03	p.0,03		-	1	Eurofins	SFBA0-7	3.51	54.695007	18.422677	54.693555	18.426393	54.691556	18.425256	54.693084	18.419877
Michał Korthals	8	19	19_44/2_w2	86/18/1029	19_44/2	2018-04-05	2018-05-16	Fensulfotion	mg/kg	0.03	p.0,03		-	1	Eurofins	SFBA0-7	3.51	54.695007	18.422677	54.693555	18.426393	54.691556	18.425256	54.693084	18.419877
Michał Korthals	8	19	19_44/2_w2	86/18/1029	19_44/2	2018-04-05	2018-05-16	Fewalerat (suma izomer ów)	mg/kg	0.015	p.0,015		-	1	Eurofins	SFBA0-7	3.51	54.695007	18.422677	54.693555	18.426393	54.691556	18.425256	54.693084	18.419877
Michał Korthals	8	19	19_44/2_w2	86/18/1029	19_44/2	2018-04-05	2018-05-16	Fenwalerat	mg/kg	0.015	p.0,015		-	1	Eurofins	SFBA0-7	3.51	54.695007	18.422677	54.693555	18.426393	54.691556	18.425256	54.693084	18.419877
Michał Korthals	8	19	19_44/2_w2	86/18/1029	19_44/2	2018-04-05	2018-05-16	Fenvalerate(RS-/SR-Izomer)	mg/kg	0.015	p.0,015		-	1	Eurofins	SFBA0-7	3.51	54.695007	18.422677	54.693555	18.426393	54.691556	18.425256	54.693084	18.419877
Michał Korthals	8	19	19_44/2_w2	86/18/1029	19_44/2	2018-04-05	2018-05-16	Fipronil	mg/kg	0.012	p.0,012		-	1	Eurofins	SFBA0-7	3.51	54.695007	18.422677	54.693555	18.426393	54.691556	18.425256	54.693084	18.419877
Michał Korthals	8	19	19_44/2_w2	86/18/1029	19_44/2	2018-04-05	2018-05-16	Fipronil,desulfinyl-	mg/kg	0.012	p.0,012		-	1	Eurofins	SFBA0-7	3.51	54.695007	18.422677	54.693555	18.426393	54.691556	18.425256	54.693084	18.419877
Michał Korthals	8	19	19_44/2_w2	86/18/1029	19_44/2	2018-04-05	2018-05-16	Fipranil+Sulfonmetab.MB46136(suma)	mg/kg	0.015	p.0,015		-	1	Eurofins	SFBA0-7	3.51	54.695007	18.422677	54.693555	18.426393	54.691556	18.425256	54.693084	18.419877
Michał Korthals	8	19	19_44/2_w2	86/18/1029	19_44/2	2018-04-05	2018-05-16	Fipronil sulfid	mg/kg	0.015	p.0,015		-	1	Eurofins	SFBA0-7	3.51	54.695007	18.422677	54.693555	18.426393	54.691556	18.425256	54.693084	18.419877
Michał Korthals	8	19	19_44/2_w2	86/18/1029	19_44/2	2018-04-05	2018-05-16	Fipronil sulfon	mg/kg	0.015	p.0,015		-	1	Eurofins	SFBA0-7	3.51	54.695007	18.422677	54.693555	18.426393	54.691556	18.425256	54.693084	18.419877
Michał Korthals	8	19	19_44/2_w2	86/18/1029	19_44/2	2018-04-05	2018-05-16	Flamprop-isopropyl	mg/kg	0.03	p.0,03		-	1	Eurofins	SFBA0-7	3.51	54.695007	18.422677	54.693555	18.426393	54.691556	18.425256	54.693084	18.419877
Michał Korthals	8	19	19_44/2_w2	86/18/1029	19_44/2	2018-04-05	2018-05-16	Flamprop-methyl	mg/kg	0.03	p.0,03		-	1	Eurofins	SFBA0-7	3.51	54.695007	18.422677	54.693555	18.426393	54.691556	18.425256	54.693084	18.419877
Michał Korthals	8	19	19_44/2_w2	86/18/1029	19_44/2	2018-04-05	2018-05-16	Flonikamid	mg/kg	0.15	p.0,15		-	1	Eurofins	SFBA0-7	3.51	54.695007	18.422677	54.693555	18.426393	54.691556	18.425256	54.693084	18.419877
Michał Korthals	8	19	19_44/2_w2	86/18/1029	19_44/2	2018-04-05	2018-05-16	Fluazifop-butyl	mg/kg	0.15	p.0,15		-	1	Eurofins	SFBA0-7	3.51	54.695007	18.422677	54.693555	18.426393	54.691556	18.425256	54.693084	18.419877
Michał Korthals	8	19	19_44/2_w2	86/18/1029	19_44/2	2018-04-05	2018-05-16	Fluazinam	mg/kg	0.03	p.0,03		-	1	Eurofins	SFBA0-7	3.51	54.695007	18.422677	54.693555	18.426393	54.691556	18.425256	54.693084	18.419877
Michał Korthals	8	19	19_44/2_w2	86/18/1029	19_44/2	2018-04-05	2018-05-16	Fluchloralina	mg/kg	0.015	p.0,015		-	1	Eurofins	SFBA0-7	3.51	54.695007	18.422677	54.693555	18.426393	54.691556	18.425256	54.693084	18.419877
Michał Korthals	8	19	19_44/2_w2	86/18/1029	19_44/2	2018-04-05	2018-05-16	Flucytrynat	mg/kg	0.03	p.0,03		-	1	Eurofins	SFBA0-7	3.51	54.695007	18.422677	54.693555	18.426393	54.691556	18.425256	54.693084	18.419877
Michał Korthals	8	19	19_44/2_w2	86/18/1029	19_44/2	2018-04-05	2018-05-16	Flufenoksuron	mg/kg	0.03	p.0,03		-	1	Eurofins	SFBA0-7	3.51	54.695007	18.422677	54.693555	18.426393	54.691556	18.425256	54.693084	18.419877
Michał Korthals	8	19	19_44/2_w2	86/18/1029	19_44/2	2018-04-05	2018-05-16	Flumethrine	mg/kg	0.03	p.0,03		-	1	Eurofins	SFBA0-7	3.51	54.695007	18.422677	54.693555	18.426393	54.691556	18.425256	54.693084	18.419877
Michał Korthals	8	19	19_44/2_w2	86/18/1029	19_44/2	2018-04-05	2018-05-16	Flumetralin	mg/kg	0.015	p.0,015		-	1	Eurofins	SFBA0-7	3.51	54.695007	18.422677	54.693555	18.426393	54.691556	18.425256	54.693084	18.419877
Michał Korthals	8	19	19_44/2_w2	86/18/1029	19_44/2	2018-04-05	2018-05-16	Flupikolid	mg/kg	0.03	p.0,03		-	1	Eurofins	SFBA0-7	3.51	54.695007	18.422677	54.693555	18.426393	54.691556	18.425256	54.693084	18.419877
Michał Korthals	8	19	19_44/2_w2	86/18/1029	19_44/2	2018-04-05	2018-05-16	Fluorodifen	mg/kg	0.015	p.0,015		-	1	Eurofins	SFBA0-7	3.51	54.695007	18.422677	54.693555	18.426393	54.691556	18.425256	54.693084	18.419877
Michał Korthals	8	19	19_44/2_w2	86/18/1029	19_44/2	2018-04-05	2018-05-16	Fluotrimazole	mg/kg	0.1	p.0,1		-	1	Eurofins	SFBA0-7	3.51	54.695007	18.422677	54.693555	18.426393	54.691556	18.425256	54.693084	18.419877
Michał Korthals	8	19	19_44/2_w2	86/18/1029	19_44/2	2018-04-05	2018-05-16	Fluchinkonazol	mg/kg	0.03	p.0,03		-	1	Eurofins	SFBA0-7	3.51	54.695007	18.422677	54.693555	18.426393	54.691556	18.425256	54.693084	18.419877
Michał Korthals	8	19	19_44/2_w2	86/18/1029	19_44/2	2018-04-05	2018-05-16	Flurenol-butyl	mg/kg	0.06	p.0,06		-	1	Eurofins	SFBA0-7	3.51	54.695007	18.422677	54.693555	18.426393	54.691556	18.425256	54.693084	18.419877
Michał Korthals	8	19	19_44/2_w2	86/18/1029	19_44/2	2018-04-05	2018-05-16	Flurochloridon	mg/kg	0.03	p.0,03		-	1	Eurofins	SFBA0-7	3.51	54.695007	18.422677	54.693555	18.426393	54.691556	18.425256	54.693084	18.419877
Michał Korthals	8	19	19_44/2_w2	86/18/1029	19_44/2	2018-04-05	2018-05-16	Flurtamone	mg/kg	0.03	p.0,03		-	1	Eurofins	SFBA0-7	3.51	54.695007	18.422677	54.693555	18.426393	54.691556	18.425256	54.693084	18.419877
Michał Korthals	8	19	19_44/2_w2	86/18/1029	19_44/2	2018-04-05	2018-05-16	Flusilazol	mg/kg	0.075	p.0,075		-	1	Eurofins	SFBA0-7	3.51	54.695007	18.422677	54.693555	18.426393	54.691556	18.425256	54.693084	18.419877
Michał Korthals	8	19	19_44/2_w2	86/18/1029	19_44/2	2018-04-05	2018-05-16	Folpet	mg/kg	0.03	p.0,03		-	1	Eurofins	SFBA0-7	3.51	54.695007	18.422677	54.693555	18.426393	54.691556	18.425256	54.693084	18.419877
Michał Korthals	8	19	19_44/2_w2	86/18/1029	19_44/2	2018-04-05	2018-05-16	Fonofos	mg/kg	0.015	p.0,015		-	1	Eurofins	SFBA0-7	3.51	54.695007	18.422677	54.693555	18.426393	54.691556	18.425256	54.693084	18.419877
Michał Korthals	8	19	19_44/2_w2	86/18/1029	19_44/2	2018-04-05	2018-05-16	Formotion	mg/kg	0.03	p.0,03		-	1	Eurofins	SFBA0-7	3.51	54.695007	18.422677	54.693555	18.426393	54.691556	18.425256	54.693084	18.419877
Michał Korthals	8	19	19_44/2_w2	86/18/1029	19_44/2	2018-04-05	2018-05-16	Genite	mg/kg	0.03	p.0,03		-	1	Eurofins	SFBA0-7	3.51	54.695007	18.422677	54.693555	18.426393	54.691556	18.425256	54.693084	18.419877
Michał Korthals	8	19	19_44/2_w2	86/18/1029	19_44/2	2018-04-05	2018-05-16	Halfenprox	mg/kg	0.03	p.0,03		-	1	Eurofins	SFBA0-7	3.51	54.695007	18.422677	54.693555	18.426393	54.691556	18.425256	54.693084	18.419877
Michał Korthals	8	19	19_44/2_w2	86/18/1029	19_44/2	2018-04-05	2018-05-16	Haloxyfop-Ethoxyethyl	mg/kg	0.03	p.0,03		-	1	Eurofins	SFBA0-7	3.51	54.695007	18.422677	54.693555	18.426393	54.691556	18.425256	54.693084	18.419877
Michał Korthals	8	19	19_44/2_w2	86/18/1029	19_44/2	2018-04-05	2018-05-16	Haloxyfop-methyl	mg/kg	0.15	p.0,15		-	1	Eurofins	SFBA0-7	3.51	54.695007	18.422677	54.693555	18.426393	54.691556	18.425256	54.693084	18.419877
Michał Korthals	8	19	19_44/2_w2	86/18/1029	19_44/2	2018-04-05	2018-05-16	HCH (sumaizomerów-bez lindan)	mg/kg	0.015	p.0,015		-	1	Eurofins	SFBA0-7	3.51	54.695007	18.422677	54.693555	18.426393	54.691556	18.425256	54.693084	18.419877
Michał Korthals	8	19	19_44/2_w2	86/18/1029	19_44/2	2018-04-05	2018-05-16	Alfa-HCH	mg/kg	0.015	p.0,015		-	1	Eurofins	SFBA0-7	3.51	54.695007	18.422677	54.693555	18.426393	54.691556	18.425256	54.693084	18.419877
Michał Korthals	8	19	19_44/2_w2	86/18/1029	19_44/2	2018-04-05	2018-05-16	Beta-HCH	mg/kg	0.015	p.0,015		-	1	Eurofins	SFBA0-7	3.51	54.695007	18.422677	54.693555	18.426393	54.691556	18.425256	54.693084	18.419877
Michał Korthals	8	19	19_44/2_w2	86/18/1029	19_44/2	2018-04-05	2018-05-16	Delta-HCH	mg/kg	0.015	p.0,015		-	1	Eurofins	SFBA0-7	3.51	54.695007	18.422677	54.693555	18.426393	54.691556	18.425256	54.693084	18.419877
Michał Korthals	8	19	19_44/2_w2	86/18/1029	19_44/2	2018-04-05	2018-05-16	Epsilon-HCH	mg/kg	0.015	p.0,015		-	1	Eurofins	SFBA0-7	3.51	54.695007	18.422677	54.693555	18.426393	54.691556	18.425256	54.693084	18.419877
Michał Korthals	8	19	19_44/2_w2	86/18/1029	19_44/2	2018-04-05	2018-05-16	Lindan(gamma-HCH)	mg/kg	0.015	p.0,015		-	1	Eurofins	SFBA0-7	3.51	54.695007	18.422677	54.693555	18.426393	54.691556	18.425256	54.693084	18.419877
Michał Korthals	8	19	19_44/2_w2	86/18/1029	19_44/2	2018-04-05	2018-05-16	Heptachlor	mg/kg	0.015	p.0,015		-	1	Eurofins	SFBA0-7	3.51	54.695007	18.422677	54.693555	18.426393	54.691556	18.425256	54.693084	18.419877
Michał Korthals	8	19	19_44/2_w2	86/18/1029	19_44/2	2018-04-05	2018-05-16	Heptachlor(suma)	mg/kg	0.015	p.0,015		-	1	Eurofins	SFBA0-7	3.51	54.695007	18.422677	54.693555	18.426393	54.691556	18.425256	54.693084	18.419877
Michał Korthals	8	19	19_44/2_w2	86/18/1029	19_44/2	2018-04-05	2018-05-16	Heptahlor-trans-epoksyd	mg/kg	0.015	p.0,015		-	1	Eurofins	SFBA0-7	3.51	54.695007	18.422677	54.693555	18.426393	54.691556	18.425256	54.693084	18.419877
Michał Korthals	8	19	19_44/2_w2	86/18/1029	19_44/2	2018-04-05	2018-05-16	Heptahlor-cis-epoksyd	mg/kg	0.015	p.0,015		-	1	Eurofins	SFBA0-7	3.51	54.695007	18.422677	54.693555	18.426393	54.691556	18.425256	54.693084	18.419877
Michał Korthals	8	19	19_44/2_w2	86/18/1029	19_44/2	2018-04-05	2018-05-16	Heptenofos	mg/kg	0.03	p.0,03		-	1	Eurofins	SFBA0-7	3.51	54.695007	18.422677	54.693555	18.426393	54.691556	18.425256	54.693084	18.419877
Michał Korthals	8	19	19_44/2_w2	86/18/1029	19_44/2	2018-04-05	2018-05-16	Heksachlorobenzen(HCB)	mg/kg	0.015	p.0,015		-	1	Eurofins	SFBA0-7	3.51	54.695007	18.422677	54.693555	18.426393	54.691556	18.425256	54.693084	18.419877
Michał Korthals	8	19	19_44/2_w2	86/18/1029	19_44/2	2018-04-05	2018-05-16	Heksakonazol	mg/kg	0.045	p.0,045		-	1	Eurofins	SFBA0-7	3.51	54.695007	18.422677	54.693555	18.426393	54.691556	18.425256	54.693084	18.419877
Michał Korthals	8	19	19_44/2_w2	86/18/1029	19_44/2	2018-04-05	2018-05-16	Indanofan	mg/kg	0.06	p.0,06		-	1	Eurofins	SFBA0-7	3.51	54.695007	18.422677	54.693555	18.426393	54.691556	18.425256	54.693084	18.419877
Michał Korthals	8	19	19_44/2_w2	86/18/1029	19_44/2	2018-04-05	2018-05-16	Indoksakarb	mg/kg	0.015	p.0,015		-	1	Eurofins	SFBA0-7	3.51	54.695007	18.422677	54.693555	18.426393	54.691556	18.425256	54.693084	18.419877
Michał Korthals	8	19	19_44/2_w2	86/18/1029	19_44/2	2018-04-05	2018-05-16	Jodofenfos	mg/kg	0.015	p.0,015		-	1	Eurofins	SFBA0-7	3.51	54.695007	18.422677	54.693555	18.426393	54.691556	18.425256	54.693084	18.419877
Michał Korthals	8	19	19_44/2_w2	86/18/1029	19_44/2	2018-04-05	2018-05-16	Ioxynil-Octanoate	mg/kg	0.03	p.0,03		-	1	Eurofins	SFBA0-7	3.51	54.695007	18.422677	54.693555	18.426393	54.691556	18.425256	54.693084	18.419877
Michał Korthals	8	19	19_44/2_w2	86/18/1029	19_44/2	2018-04-05	2018-05-16	Iprobenfos	mg/kg	0.03	p.0,03		-	1	Eurofins	SFBA0-7	3.51	54.695007	18.422677	54.693555	18.426393	54.691556	18.425256	54.693084	18.419877
Michał Korthals	8	19	19_44/2_w2	86/18/1029	19_44/2	2018-04-05	2018-05-16	Iprodion	mg/kg	0.03	p.0,03		-	1	Eurofins	SFBA0-7	3.51	54.695007	18.422677	54.693555	18.426393	54.691556	18.425256	54.693084	18.419877
Michał Korthals	8	19	19_44/2_w2	86/18/1029	19_44/2	2018-04-05	2018-05-16	Isazophos	mg/kg	0.03	p.0,03		-	1	Eurofins	SFBA0-7	3.51	54.695007	18.422677	54.693555	18.426393	54.691556	18.425256	54.693084	18.419877
Michał Korthals	8	19	19_44/2_w2	86/18/1029	19_44/2	2018-04-05	2018-05-16	Isobenzan	mg/kg	0.015	p.0,015		-	1	Eurofins	SFBA0-7	3.51	54.695007	18.422677	54.693555	18.426393	54.691556	18.425256	54.693084	18.419877
Michał Korthals	8	19	19_44/2_w2	86/18/1029	19_44/2	2018-04-05	2018-05-16	Isocarbofos	mg/kg	0.03	p.0,03		-	1	Eurofins	SFBA0-7	3.51	54.695007	18.422677	54.693555	18.426393	54.691556	18.425256	54.693084	18.419877
Michał Korthals	8	19	19_44/2_w2	86/18/1029	19_44/2	2018-04-05	2018-05-16	Izodryna	mg/kg	0.015	p.0,015		-	1	Eurofins	SFBA0-7	3.51	54.695007	18.422677	54.693555	18.426393	54.691556	18.425256	54.693084	18.419877
Michał Korthals	8	19	19_44/2_w2	86/18/1029	19_44/2	2018-04-05	2018-05-16	Izofenfos	mg/kg	0.015	p.0,015		-	1	Eurofins	SFBA0-7	3.51	54.695007	18.422677	54.693555	18.426393	54.691556	18.425256	54.693084	18.419877
Michał Korthals	8	19	19_44/2_w2	86/18/1029	19_44/2	2018-04-05	2018-05-16	Isofenphos-Methyl	mg/kg	0.015	p.0,015		-	1	Eurofins	SFBA0-7	3.51	54.695007	18.422677	54.693555	18.426393	54.691556	18.425256	54.693084	18.419877
Michał Korthals	8	19	19_44/2_w2	86/18/1029	19_44/2	2018-04-05	2018-05-16	Isomethiozin	mg/kg	0.03	p.0,03		-	1	Eurofins	SFBA0-7	3.51	54.695007	18.422677	54.693555	18.426393	54.691556	18.425256	54.693084	18.419877
Michał Korthals	8	19	19_44/2_w2	86/18/1029	19_44/2	2018-04-05	2018-05-16	Isopropalin	mg/kg	0.015	p.0,015		-	1	Eurofins	SFBA0-7	3.51	54.695007	18.422677	54.693555	18.426393	54.691556	18.425256	54.693084	18.419877
Michał Korthals	8	19	19_44/2_w2	86/18/1029	19_44/2	2018-04-05	2018-05-16	Isoxadifen-ethyl	mg/kg	0.03	p.0,03		-	1	Eurofins	SFBA0-7	3.51	54.695007	18.422677	54.693555	18.426393	54.691556	18.425256	54.693084	18.419877
Michał Korthals	8	19	19_44/2_w2	86/18/1029	19_44/2	2018-04-05	2018-05-16	Krezoksym-metylu	mg/kg	0.015	p.0,015		-	1	Eurofins	SFBA0-7	3.51	54.695007	18.422677	54.693555	18.426393	54.691556	18.425256	54.693084	18.419877
Michał Korthals	8	19	19_44/2_w2	86/18/1029	19_44/2	2018-04-05	2018-05-16	Lactofen	mg/kg	0.03	p.0,03		-	1	Eurofins	SFBA0-7	3.51	54.695007	18.422677	54.693555	18.426393	54.691556	18.425256	54.693084	18.419877
Michał Korthals	8	19	19_44/2_w2	86/18/1029	19_44/2	2018-04-05	2018-05-16	Leptophos	mg/kg	0.03	p.0,03		-	1	Eurofins	SFBA0-7	3.51	54.695007	18.422677	54.693555	18.426393	54.691556	18.425256	54.693084	18.419877
Michał Korthals	8	19	19_44/2_w2	86/18/1029	19_44/2	2018-04-05	2018-05-16	Lufenuron	mg/kg	0.036	p.0,036		-	1	Eurofins	SFBA0-7	3.51	54.695007	18.422677	54.693555	18.426393	54.691556	18.425256	54.693084	18.419877
Michał Korthals	8	19	19_44/2_w2	86/18/1029	19_44/2	2018-04-05	2018-05-16	Malaokson	mg/kg	0.015	p.0,015		-	1	Eurofins	SFBA0-7	3.51	54.695007	18.422677	54.693555	18.426393	54.691556	18.425256	54.693084	18.419877
Michał Korthals	8	19	19_44/2_w2	86/18/1029	19_44/2	2018-04-05	2018-05-16	Malation	mg/kg	0.03	p.0,03		-	1	Eurofins	SFBA0-7	3.51	54.695007	18.422677	54.693555	18.426393	54.691556	18.425256	54.693084	18.419877
Michał Korthals	8	19	19_44/2_w2	86/18/1029	19_44/2	2018-04-05	2018-05-16	Mekarbam	mg/kg	0.03	p.0,03		-	1	Eurofins	SFBA0-7	3.51	54.695007	18.422677	54.693555	18.426393	54.691556	18.425256	54.693084	18.419877
Michał Korthals	8	19	19_44/2_w2	86/18/1029	19_44/2	2018-04-05	2018-05-16	Mephosfolan	mg/kg	0.03	p.0,03		-	1	Eurofins	SFBA0-7	3.51	54.695007	18.422677	54.693555	18.426393	54.691556	18.425256	54.693084	18.419877
Michał Korthals	8	19	19_44/2_w2	86/18/1029	19_44/2	2018-04-05	2018-05-16	Merphos	mg/kg	0.03	p.0,03		-	1	Eurofins	SFBA0-7	3.51	54.695007	18.422677	54.693555	18.426393	54.691556	18.425256	54.693084	18.419877
Michał Korthals	8	19	19_44/2_w2	86/18/1029	19_44/2	2018-04-05	2018-05-16	Metazachlor	mg/kg	0.03	p.0,03		-	1	Eurofins	SFBA0-7	3.51	54.695007	18.422677	54.693555	18.426393	54.691556	18.425256	54.693084	18.419877
Michał Korthals	8	19	19_44/2_w2	86/18/1029	19_44/2	2018-04-05	2018-05-16	Metakrifos	mg/kg	0.15	p.0,15		-	1	Eurofins	SFBA0-7	3.51	54.695007	18.422677	54.693555	18.426393	54.691556	18.425256	54.693084	18.419877
Michał Korthals	8	19	19_44/2_w2	86/18/1029	19_44/2	2018-04-05	2018-05-16	Metydation	mg/kg	0.036	p.0,03600		-	1	Eurofins	SFBA0-7	3.51	54.695007	18.422677	54.693555	18.426393	54.691556	18.425256	54.693084	18.419877
Michał Korthals	8	19	19_44/2_w2	86/18/1029	19_44/2	2018-04-05	2018-05-16	Metoksychlor	mg/kg	0.015	p.0,015		-	1	Eurofins	SFBA0-7	3.51	54.695007	18.422677	54.693555	18.426393	54.691556	18.425256	54.693084	18.419877
Michał Korthals	8	19	19_44/2_w2	86/18/1029	19_44/2	2018-04-05	2018-05-16	Metolachlor	mg/kg	0.15	p.0,15		-	1	Eurofins	SFBA0-7	3.51	54.695007	18.422677	54.693555	18.426393	54.691556	18.425256	54.693084	18.419877
Michał Korthals	8	19	19_44/2_w2	86/18/1029	19_44/2	2018-04-05	2018-05-16	Metrafenon	mg/kg	0.15	p.0,15		-	1	Eurofins	SFBA0-7	3.51	54.695007	18.422677	54.693555	18.426393	54.691556	18.425256	54.693084	18.419877
Michał Korthals	8	19	19_44/2_w2	86/18/1029	19_44/2	2018-04-05	2018-05-16	Metribuzyn	mg/kg	0.03	p.0,03		-	1	Eurofins	SFBA0-7	3.51	54.695007	18.422677	54.693555	18.426393	54.691556	18.425256	54.693084	18.419877
Michał Korthals	8	19	19_44/2_w2	86/18/1029	19_44/2	2018-04-05	2018-05-16	Mevinfos	mg/kg	0.03	p.0,03		-	1	Eurofins	SFBA0-7	3.51	54.695007	18.422677	54.693555	18.426393	54.691556	18.425256	54.693084	18.419877
Michał Korthals	8	19	19_44/2_w2	86/18/1029	19_44/2	2018-04-05	2018-05-16	Mirex	mg/kg	0.015	p.0,015		-	1	Eurofins	SFBA0-7	3.51	54.695007	18.422677	54.693555	18.426393	54.691556	18.425256	54.693084	18.419877
Michał Korthals	8	19	19_44/2_w2	86/18/1029	19_44/2	2018-04-05	2018-05-16	Molinate	mg/kg	0.045	p.0,045		-	1	Eurofins	SFBA0-7	3.51	54.695007	18.422677	54.693555	18.426393	54.691556	18.425256	54.693084	18.419877
Michał Korthals	8	19	19_44/2_w2	86/18/1029	19_44/2	2018-04-05	2018-05-16	Myklobutanil	mg/kg	0.015	0.015		-	1	Eurofins	SFBA0-7	3.51	54.695007	18.422677	54.693555	18.426393	54.691556	18.425256	54.693084	18.419877
Michał Korthals	8	19	19_44/2_w2	86/18/1029	19_44/2	2018-04-05	2018-05-16	Nitralin	mg/kg	0.03	p.0,03		-	1	Eurofins	SFBA0-7	3.51	54.695007	18.422677	54.693555	18.426393	54.691556	18.425256	54.693084	18.419877
Michał Korthals	8	19	19_44/2_w2	86/18/1029	19_44/2	2018-04-05	2018-05-16	Nitrapyrin	mg/kg	0.06	p.0,06		-	1	Eurofins	SFBA0-7	3.51	54.695007	18.422677	54.693555	18.426393	54.691556	18.425256	54.693084	18.419877
Michał Korthals	8	19	19_44/2_w2	86/18/1029	19_44/2	2018-04-05	2018-05-16	Nitrofen	mg/kg	0.03	p.0,03		-	1	Eurofins	SFBA0-7	3.51	54.695007	18.422677	54.693555	18.426393	54.691556	18.425256	54.693084	18.419877
Michał Korthals	8	19	19_44/2_w2	86/18/1029	19_44/2	2018-04-05	2018-05-16	Nitrothal-isopropyl	mg/kg	0.03	p.0,03		-	1	Eurofins	SFBA0-7	3.51	54.695007	18.422677	54.693555	18.426393	54.691556	18.425256	54.693084	18.419877
Michał Korthals	8	19	19_44/2_w2	86/18/1029	19_44/2	2018-04-05	2018-05-16	Norflurazon	mg/kg	0.15	p.0,15		-	1	Eurofins	SFBA0-7	3.51	54.695007	18.422677	54.693555	18.426393	54.691556	18.425256	54.693084	18.419877
Michał Korthals	8	19	19_44/2_w2	86/18/1029	19_44/2	2018-04-05	2018-05-16	Nuarimol	mg/kg	0.03	p.0,03		-	1	Eurofins	SFBA0-7	3.51	54.695007	18.422677	54.693555	18.426393	54.691556	18.425256	54.693084	18.419877
Michał Korthals	8	19	19_44/2_w2	86/18/1029	19_44/2	2018-04-05	2018-05-16	Ometoat	mg/kg	0.3	p.0,3		-	1	Eurofins	SFBA0-7	3.51	54.695007	18.422677	54.693555	18.426393	54.691556	18.425256	54.693084	18.419877
Michał Korthals	8	19	19_44/2_w2	86/18/1029	19_44/2	2018-04-05	2018-05-16	Oxadiazon	mg/kg	0.015	p.0,015		-	1	Eurofins	SFBA0-7	3.51	54.695007	18.422677	54.693555	18.426393	54.691556	18.425256	54.693084	18.419877
Michał Korthals	8	19	19_44/2_w2	86/18/1029	19_44/2	2018-04-05	2018-05-16	Oxydemeton-methyl	mg/kg	0.03	p.0,03		-	1	Eurofins	SFBA0-7	3.51	54.695007	18.422677	54.693555	18.426393	54.691556	18.425256	54.693084	18.419877
Michał Korthals	8	19	19_44/2_w2	86/18/1029	19_44/2	2018-04-05	2018-05-16	Oksyfluoroten	mg/kg	0.03	p.0,03		-	1	Eurofins	SFBA0-7	3.51	54.695007	18.422677	54.693555	18.426393	54.691556	18.425256	54.693084	18.419877
Michał Korthals	8	19	19_44/2_w2	86/18/1029	19_44/2	2018-04-05	2018-05-16	Paklobutrazol	mg/kg	0.12	p.0,12		-	1	Eurofins	SFBA0-7	3.51	54.695007	18.422677	54.693555	18.426393	54.691556	18.425256	54.693084	18.419877
Michał Korthals	8	19	19_44/2_w2	86/18/1029	19_44/2	2018-04-05	2018-05-16	Paraoxon-ethyl	mg/kg	0.045	p.0,045		-	1	Eurofins	SFBA0-7	3.51	54.695007	18.422677	54.693555	18.426393	54.691556	18.425256	54.693084	18.419877
Michał Korthals	8	19	19_44/2_w2	86/18/1029	19_44/2	2018-04-05	2018-05-16	Paraokson metylowy	mg/kg	0.045	p.0,045		-	1	Eurofins	SFBA0-7	3.51	54.695007	18.422677	54.693555	18.426393	54.691556	18.425256	54.693084	18.419877
Michał Korthals	8	19	19_44/2_w2	86/18/1029	19_44/2	2018-04-05	2018-05-16	Paration	mg/kg	0.015	p.0,015		-	1	Eurofins	SFBA0-7	3.51	54.695007	18.422677	54.693555	18.426393	54.691556	18.425256	54.693084	18.419877
Michał Korthals	8	19	19_44/2_w2	86/18/1029	19_44/2	2018-04-05	2018-05-16	Paration metylu	mg/kg	0.015	p.0,015		-	1	Eurofins	SFBA0-7	3.51	54.695007	18.422677	54.693555	18.426393	54.691556	18.425256	54.693084	18.419877
Michał Korthals	8	19	19_44/2_w2	86/18/1029	19_44/2	2018-04-05	2018-05-16	Paration metylu/Paraokson metylu (suma)	mg/kg	0.015	p.0,015		-	1	Eurofins	SFBA0-7	3.51	54.695007	18.422677	54.693555	18.426393	54.691556	18.425256	54.693084	18.419877
Michał Korthals	8	19	19_44/2_w2	86/18/1029	19_44/2	2018-04-05	2018-05-16	PCB IUPAC 101	mg/kg	0.015	p.0,015		-	1	Eurofins	SFBA0-7	3.51	54.695007	18.422677	54.693555	18.426393	54.691556	18.425256	54.693084	18.419877
Michał Korthals	8	19	19_44/2_w2	86/18/1029	19_44/2	2018-04-05	2018-05-16	PCB 118	mg/kg	0.015	p.0,015		-	1	Eurofins	SFBA0-7	3.51	54.695007	18.422677	54.693555	18.426393	54.691556	18.425256	54.693084	18.419877
Michał Korthals	8	19	19_44/2_w2	86/18/1029	19_44/2	2018-04-05	2018-05-16	PCB 138	mg/kg	0.015	p.0,015		-	1	Eurofins	SFBA0-7	3.51	54.695007	18.422677	54.693555	18.426393	54.691556	18.425256	54.693084	18.419877
Michał Korthals	8	19	19_44/2_w2	86/18/1029	19_44/2	2018-04-05	2018-05-16	PCB 153	mg/kg	0.015	p.0,015		-	1	Eurofins	SFBA0-7	3.51	54.695007	18.422677	54.693555	18.426393	54.691556	18.425256	54.693084	18.419877
Michał Korthals	8	19	19_44/2_w2	86/18/1029	19_44/2	2018-04-05	2018-05-16	PCB 180	mg/kg	0.015	p.0,015		-	1	Eurofins	SFBA0-7	3.51	54.695007	18.422677	54.693555	18.426393	54.691556	18.425256	54.693084	18.419877
Michał Korthals	8	19	19_44/2_w2	86/18/1029	19_44/2	2018-04-05	2018-05-16	PCB 28	mg/kg	0.015	p.0,015		-	1	Eurofins	SFBA0-7	3.51	54.695007	18.422677	54.693555	18.426393	54.691556	18.425256	54.693084	18.419877
Michał Korthals	8	19	19_44/2_w2	86/18/1029	19_44/2	2018-04-05	2018-05-16	PCB 52	mg/kg	0.015	p.0,015		-	1	Eurofins	SFBA0-7	3.51	54.695007	18.422677	54.693555	18.426393	54.691556	18.425256	54.693084	18.419877
Michał Korthals	8	19	19_44/2_w2	86/18/1029	19_44/2	2018-04-05	2018-05-16	Penkonazol	mg/kg	0.03	p.0,03		-	1	Eurofins	SFBA0-7	3.51	54.695007	18.422677	54.693555	18.426393	54.691556	18.425256	54.693084	18.419877
Michał Korthals	8	19	19_44/2_w2	86/18/1029	19_44/2	2018-04-05	2018-05-16	Pendimetalina	mg/kg	0.015	p.0,015		-	1	Eurofins	SFBA0-7	3.51	54.695007	18.422677	54.693555	18.426393	54.691556	18.425256	54.693084	18.419877
Michał Korthals	8	19	19_44/2_w2	86/18/1029	19_44/2	2018-04-05	2018-05-16	Pentachloranisol	mg/kg	0.015	p.0,015		-	1	Eurofins	SFBA0-7	3.51	54.695007	18.422677	54.693555	18.426393	54.691556	18.425256	54.693084	18.419877
Michał Korthals	8	19	19_44/2_w2	86/18/1029	19_44/2	2018-04-05	2018-05-16	Pentachloraniline	mg/kg	0.03	p.0,03		-	1	Eurofins	SFBA0-7	3.51	54.695007	18.422677	54.693555	18.426393	54.691556	18.425256	54.693084	18.419877
Michał Korthals	8	19	19_44/2_w2	86/18/1029	19_44/2	2018-04-05	2018-05-16	Pentachlorobenzen	mg/kg	0.015	p.0,015		-	1	Eurofins	SFBA0-7	3.51	54.695007	18.422677	54.693555	18.426393	54.691556	18.425256	54.693084	18.419877
Michał Korthals	8	19	19_44/2_w2	86/18/1029	19_44/2	2018-04-05	2018-05-16	Pentachlorothioanisole	mg/kg	0.03	p.0,03		-	1	Eurofins	SFBA0-7	3.51	54.695007	18.422677	54.693555	18.426393	54.691556	18.425256	54.693084	18.419877
Michał Korthals	8	19	19_44/2_w2	86/18/1029	19_44/2	2018-04-05	2018-05-16	Permetryna	mg/kg	0.06	p.0,06		-	1	Eurofins	SFBA0-7	3.51	54.695007	18.422677	54.693555	18.426393	54.691556	18.425256	54.693084	18.419877
Michał Korthals	8	19	19_44/2_w2	86/18/1029	19_44/2	2018-04-05	2018-05-16	Pertan	mg/kg	0.6	p.0,6		-	1	Eurofins	SFBA0-7	3.51	54.695007	18.422677	54.693555	18.426393	54.691556	18.425256	54.693084	18.419877
Michał Korthals	8	19	19_44/2_w2	86/18/1029	19_44/2	2018-04-05	2018-05-16	Phenkapton	mg/kg	0.03	p.0,03		-	1	Eurofins	SFBA0-7	3.51	54.695007	18.422677	54.693555	18.426393	54.691556	18.425256	54.693084	18.419877
Michał Korthals	8	19	19_44/2_w2	86/18/1029	19_44/2	2018-04-05	2018-05-16	Phenothrin	mg/kg	0.03	p.0,03		-	1	Eurofins	SFBA0-7	3.51	54.695007	18.422677	54.693555	18.426393	54.691556	18.425256	54.693084	18.419877
Michał Korthals	8	19	19_44/2_w2	86/18/1029	19_44/2	2018-04-05	2018-05-16	Fentoat	mg/kg	0.03	p.0,03		-	1	Eurofins	SFBA0-7	3.51	54.695007	18.422677	54.693555	18.426393	54.691556	18.425256	54.693084	18.419877
Michał Korthals	8	19	19_44/2_w2	86/18/1029	19_44/2	2018-04-05	2018-05-16	Fosalon	mg/kg	0.03	p.0,03		-	1	Eurofins	SFBA0-7	3.51	54.695007	18.422677	54.693555	18.426393	54.691556	18.425256	54.693084	18.419877
Michał Korthals	8	19	19_44/2_w2	86/18/1029	19_44/2	2018-04-05	2018-05-16	Phosfolane	mg/kg	0.03	p.0,03		-	1	Eurofins	SFBA0-7	3.51	54.695007	18.422677	54.693555	18.426393	54.691556	18.425256	54.693084	18.419877
Michał Korthals	8	19	19_44/2_w2	86/18/1029	19_44/2	2018-04-05	2018-05-16	Fosmet	mg/kg	0.03	p.0,03		-	1	Eurofins	SFBA0-7	3.51	54.695007	18.422677	54.693555	18.426393	54.691556	18.425256	54.693084	18.419877
Michał Korthals	8	19	19_44/2_w2	86/18/1029	19_44/2	2018-04-05	2018-05-16	Picolinafen	mg/kg	0.03	p.0,03		-	1	Eurofins	SFBA0-7	3.51	54.695007	18.422677	54.693555	18.426393	54.691556	18.425256	54.693084	18.419877
Michał Korthals	8	19	19_44/2_w2	86/18/1029	19_44/2	2018-04-05	2018-05-16	Pikoksystrobina	mg/kg	0.06	p.0,06		-	1	Eurofins	SFBA0-7	3.51	54.695007	18.422677	54.693555	18.426393	54.691556	18.425256	54.693084	18.419877
Michał Korthals	8	19	19_44/2_w2	86/18/1029	19_44/2	2018-04-05	2018-05-16	Piperophos	mg/kg	0.03	p.0,03		-	1	Eurofins	SFBA0-7	3.51	54.695007	18.422677	54.693555	18.426393	54.691556	18.425256	54.693084	18.419877
Michał Korthals	8	19	19_44/2_w2	86/18/1029	19_44/2	2018-04-05	2018-05-16	Pirymifos metylowy	mg/kg	0.03	p.0,03		-	1	Eurofins	SFBA0-7	3.51	54.695007	18.422677	54.693555	18.426393	54.691556	18.425256	54.693084	18.419877
Michał Korthals	8	19	19_44/2_w2	86/18/1029	19_44/2	2018-04-05	2018-05-16	Pirymifos etylu	mg/kg	0.03	p.0,03		-	1	Eurofins	SFBA0-7	3.51	54.695007	18.422677	54.693555	18.426393	54.691556	18.425256	54.693084	18.419877
Michał Korthals	8	19	19_44/2_w2	86/18/1029	19_44/2	2018-04-05	2018-05-16	Plifenate	mg/kg	0.03	p.0,03		-	1	Eurofins	SFBA0-7	3.51	54.695007	18.422677	54.693555	18.426393	54.691556	18.425256	54.693084	18.419877
Michał Korthals	8	19	19_44/2_w2	86/18/1029	19_44/2	2018-04-05	2018-05-16	Praletryna	mg/kg	0.03	p.0,03		-	1	Eurofins	SFBA0-7	3.51	54.695007	18.422677	54.693555	18.426393	54.691556	18.425256	54.693084	18.419877
Michał Korthals	8	19	19_44/2_w2	86/18/1029	19_44/2	2018-04-05	2018-05-16	Procymidon	mg/kg	0.045	p.0,045		-	1	Eurofins	SFBA0-7	3.51	54.695007	18.422677	54.693555	18.426393	54.691556	18.425256	54.693084	18.419877
Michał Korthals	8	19	19_44/2_w2	86/18/1029	19_44/2	2018-04-05	2018-05-16	Profenfos	mg/kg	0.015	p.0,015		-	1	Eurofins	SFBA0-7	3.51	54.695007	18.422677	54.693555	18.426393	54.691556	18.425256	54.693084	18.419877
Michał Korthals	8	19	19_44/2_w2	86/18/1029	19_44/2	2018-04-05	2018-05-16	Profluralina	mg/kg	0.015	p.0,015		-	1	Eurofins	SFBA0-7	3.51	54.695007	18.422677	54.693555	18.426393	54.691556	18.425256	54.693084	18.419877
Michał Korthals	8	19	19_44/2_w2	86/18/1029	19_44/2	2018-04-05	2018-05-16	Propachlor	mg/kg	0.03	p.0,03		-	1	Eurofins	SFBA0-7	3.51	54.695007	18.422677	54.693555	18.426393	54.691556	18.425256	54.693084	18.419877
Michał Korthals	8	19	19_44/2_w2	86/18/1029	19_44/2	2018-04-05	2018-05-16	Propanil	mg/kg	0.03	p.0,03		-	1	Eurofins	SFBA0-7	3.51	54.695007	18.422677	54.693555	18.426393	54.691556	18.425256	54.693084	18.419877
Michał Korthals	8	19	19_44/2_w2	86/18/1029	19_44/2	2018-04-05	2018-05-16	Propazyna	mg/kg	0.15	p.0,15		-	1	Eurofins	SFBA0-7	3.51	54.695007	18.422677	54.693555	18.426393	54.691556	18.425256	54.693084	18.419877
Michał Korthals	8	19	19_44/2_w2	86/18/1029	19_44/2	2018-04-05	2018-05-16	Propetamfos	mg/kg	0.015	p.0,015		-	1	Eurofins	SFBA0-7	3.51	54.695007	18.422677	54.693555	18.426393	54.691556	18.425256	54.693084	18.419877
Michał Korthals	8	19	19_44/2_w2	86/18/1029	19_44/2	2018-04-05	2018-05-16	Propikonazol	mg/kg	0.03	p.0,03		-	1	Eurofins	SFBA0-7	3.51	54.695007	18.422677	54.693555	18.426393	54.691556	18.425256	54.693084	18.419877
Michał Korthals	8	19	19_44/2_w2	86/18/1029	19_44/2	2018-04-05	2018-05-16	Propyzamid	mg/kg	0.03	p.0,03		-	1	Eurofins	SFBA0-7	3.51	54.695007	18.422677	54.693555	18.426393	54.691556	18.425256	54.693084	18.419877
Michał Korthals	8	19	19_44/2_w2	86/18/1029	19_44/2	2018-04-05	2018-05-16	Protiofos	mg/kg	0.015	p.0,015		-	1	Eurofins	SFBA0-7	3.51	54.695007	18.422677	54.693555	18.426393	54.691556	18.425256	54.693084	18.419877
Michał Korthals	8	19	19_44/2_w2	86/18/1029	19_44/2	2018-04-05	2018-05-16	Prothoat	mg/kg	0.03	p.0,03		-	1	Eurofins	SFBA0-7	3.51	54.695007	18.422677	54.693555	18.426393	54.691556	18.425256	54.693084	18.419877
Michał Korthals	8	19	19_44/2_w2	86/18/1029	19_44/2	2018-04-05	2018-05-16	Pyraclofos	mg/kg	0.03	p.0,03		-	1	Eurofins	SFBA0-7	3.51	54.695007	18.422677	54.693555	18.426393	54.691556	18.425256	54.693084	18.419877
Michał Korthals	8	19	19_44/2_w2	86/18/1029	19_44/2	2018-04-05	2018-05-16	Pyraflufen-ethyl	mg/kg	0.06	p.0,06		-	1	Eurofins	SFBA0-7	3.51	54.695007	18.422677	54.693555	18.426393	54.691556	18.425256	54.693084	18.419877
Michał Korthals	8	19	19_44/2_w2	86/18/1029	19_44/2	2018-04-05	2018-05-16	Pirazofos	mg/kg	0.03	p.0,03		-	1	Eurofins	SFBA0-7	3.51	54.695007	18.422677	54.693555	18.426393	54.691556	18.425256	54.693084	18.419877
Michał Korthals	8	19	19_44/2_w2	86/18/1029	19_44/2	2018-04-05	2018-05-16	Pyretryny	mg/kg	0.06	p.0,06		-	1	Eurofins	SFBA0-7	3.51	54.695007	18.422677	54.693555	18.426393	54.691556	18.425256	54.693084	18.419877
Michał Korthals	8	19	19_44/2_w2	86/18/1029	19_44/2	2018-04-05	2018-05-16	Pirydaben	mg/kg	0.015	p.0,015		-	1	Eurofins	SFBA0-7	3.51	54.695007	18.422677	54.693555	18.426393	54.691556	18.425256	54.693084	18.419877
Michał Korthals	8	19	19_44/2_w2	86/18/1029	19_44/2	2018-04-05	2018-05-16	Pyridaphenthion	mg/kg	0.03	p.0,03		-	1	Eurofins	SFBA0-7	3.51	54.695007	18.422677	54.693555	18.426393	54.691556	18.425256	54.693084	18.419877
Michał Korthals	8	19	19_44/2_w2	86/18/1029	19_44/2	2018-04-05	2018-05-16	Pyrifenox	mg/kg	0.03	p.0,03		-	1	Eurofins	SFBA0-7	3.51	54.695007	18.422677	54.693555	18.426393	54.691556	18.425256	54.693084	18.419877
Michał Korthals	8	19	19_44/2_w2	86/18/1029	19_44/2	2018-04-05	2018-05-16	Pirimithate	mg/kg	0.15	p.0,15		-	1	Eurofins	SFBA0-7	3.51	54.695007	18.422677	54.693555	18.426393	54.691556	18.425256	54.693084	18.419877
Michał Korthals	8	19	19_44/2_w2	86/18/1029	19_44/2	2018-04-05	2018-05-16	Chinalofos	mg/kg	0.015	p.0,015		-	1	Eurofins	SFBA0-7	3.51	54.695007	18.422677	54.693555	18.426393	54.691556	18.425256	54.693084	18.419877
Michał Korthals	8	19	19_44/2_w2	86/18/1029	19_44/2	2018-04-05	2018-05-16	Chinoksyfen	mg/kg	0.045	p.0,045		-	1	Eurofins	SFBA0-7	3.51	54.695007	18.422677	54.693555	18.426393	54.691556	18.425256	54.693084	18.419877
Michał Korthals	8	19	19_44/2_w2	86/18/1029	19_44/2	2018-04-05	2018-05-16	Kwintocen	mg/kg	0.015	p.0,015		-	1	Eurofins	SFBA0-7	3.51	54.695007	18.422677	54.693555	18.426393	54.691556	18.425256	54.693084	18.419877
Michał Korthals	8	19	19_44/2_w2	86/18/1029	19_44/2	2018-04-05	2018-05-16	Quintozene (suma)	mg/kg	0.015	p.0,015		-	1	Eurofins	SFBA0-7	3.51	54.695007	18.422677	54.693555	18.426393	54.691556	18.425256	54.693084	18.419877
Michał Korthals	8	19	19_44/2_w2	86/18/1029	19_44/2	2018-04-05	2018-05-16	Chizalofop etylowy	mg/kg	0.03	p.0,03		-	1	Eurofins	SFBA0-7	3.51	54.695007	18.422677	54.693555	18.426393	54.691556	18.425256	54.693084	18.419877
Michał Korthals	8	19	19_44/2_w2	86/18/1029	19_44/2	2018-04-05	2018-05-16	Resmetryna	mg/kg	0.3	p.0,3		-	1	Eurofins	SFBA0-7	3.51	54.695007	18.422677	54.693555	18.426393	54.691556	18.425256	54.693084	18.419877
Michał Korthals	8	19	19_44/2_w2	86/18/1029	19_44/2	2018-04-05	2018-05-16	S421 Octachlordipropyleter)	mg/kg	0.03	p.0,03		-	1	Eurofins	SFBA0-7	3.51	54.695007	18.422677	54.693555	18.426393	54.691556	18.425256	54.693084	18.419877
Michał Korthals	8	19	19_44/2_w2	86/18/1029	19_44/2	2018-04-05	2018-05-16	Spiromesifen	mg/kg	0.03	p.0,03		-	1	Eurofins	SFBA0-7	3.51	54.695007	18.422677	54.693555	18.426393	54.691556	18.425256	54.693084	18.419877
Michał Korthals	8	19	19_44/2_w2	86/18/1029	19_44/2	2018-04-05	2018-05-16	Sulfotep	mg/kg	0.03	p.0,03		-	1	Eurofins	SFBA0-7	3.51	54.695007	18.422677	54.693555	18.426393	54.691556	18.425256	54.693084	18.419877
Michał Korthals	8	19	19_44/2_w2	86/18/1029	19_44/2	2018-04-05	2018-05-16	Sulprofos	mg/kg	0.03	p.0,03		-	1	Eurofins	SFBA0-7	3.51	54.695007	18.422677	54.693555	18.426393	54.691556	18.425256	54.693084	18.419877
Michał Korthals	8	19	19_44/2_w2	86/18/1029	19_44/2	2018-04-05	2018-05-16	Swep	mg/kg	0.03	p.0,03		-	1	Eurofins	SFBA0-7	3.51	54.695007	18.422677	54.693555	18.426393	54.691556	18.425256	54.693084	18.419877
Michał Korthals	8	19	19_44/2_w2	86/18/1029	19_44/2	2018-04-05	2018-05-16	tau-Fluvalinate	mg/kg	0.015	p.0,015		-	1	Eurofins	SFBA0-7	3.51	54.695007	18.422677	54.693555	18.426393	54.691556	18.425256	54.693084	18.419877
Michał Korthals	8	19	19_44/2_w2	86/18/1029	19_44/2	2018-04-05	2018-05-16	Tebupirimfos	mg/kg	0.015	p.0,015		-	1	Eurofins	SFBA0-7	3.51	54.695007	18.422677	54.693555	18.426393	54.691556	18.425256	54.693084	18.419877
Michał Korthals	8	19	19_44/2_w2	86/18/1029	19_44/2	2018-04-05	2018-05-16	Technazen	mg/kg	0.015	p.0,015		-	1	Eurofins	SFBA0-7	3.51	54.695007	18.422677	54.693555	18.426393	54.691556	18.425256	54.693084	18.419877
Michał Korthals	8	19	19_44/2_w2	86/18/1029	19_44/2	2018-04-05	2018-05-16	Teflutryna	mg/kg	0.015	p.0,015		-	1	Eurofins	SFBA0-7	3.51	54.695007	18.422677	54.693555	18.426393	54.691556	18.425256	54.693084	18.419877
Michał Korthals	8	19	19_44/2_w2	86/18/1029	19_44/2	2018-04-05	2018-05-16	Temephos	mg/kg	0.03	p.0,03		-	1	Eurofins	SFBA0-7	3.51	54.695007	18.422677	54.693555	18.426393	54.691556	18.425256	54.693084	18.419877
Michał Korthals	8	19	19_44/2_w2	86/18/1029	19_44/2	2018-04-05	2018-05-16	Terbufos	mg/kg	0.015	p.0,015		-	1	Eurofins	SFBA0-7	3.51	54.695007	18.422677	54.693555	18.426393	54.691556	18.425256	54.693084	18.419877
Michał Korthals	8	19	19_44/2_w2	86/18/1029	19_44/2	2018-04-05	2018-05-16	Tetrachlorwinfos	mg/kg	0.015	p.0,015		-	1	Eurofins	SFBA0-7	3.51	54.695007	18.422677	54.693555	18.426393	54.691556	18.425256	54.693084	18.419877
Michał Korthals	8	19	19_44/2_w2	86/18/1029	19_44/2	2018-04-05	2018-05-16	Tetrakonazol	mg/kg	0.075	p.0,075		-	1	Eurofins	SFBA0-7	3.51	54.695007	18.422677	54.693555	18.426393	54.691556	18.425256	54.693084	18.419877
Michał Korthals	8	19	19_44/2_w2	86/18/1029	19_44/2	2018-04-05	2018-05-16	Tetradifon	mg/kg	0.015	p.0,015		-	1	Eurofins	SFBA0-7	3.51	54.695007	18.422677	54.693555	18.426393	54.691556	18.425256	54.693084	18.419877
Michał Korthals	8	19	19_44/2_w2	86/18/1029	19_44/2	2018-04-05	2018-05-16	Tetrametryna	mg/kg	0.03	p.0,03		-	1	Eurofins	SFBA0-7	3.51	54.695007	18.422677	54.693555	18.426393	54.691556	18.425256	54.693084	18.419877
Michał Korthals	8	19	19_44/2_w2	86/18/1029	19_44/2	2018-04-05	2018-05-16	Tetrasul	mg/kg	0.03	p.0,03		-	1	Eurofins	SFBA0-7	3.51	54.695007	18.422677	54.693555	18.426393	54.691556	18.425256	54.693084	18.419877
Michał Korthals	8	19	19_44/2_w2	86/18/1029	19_44/2	2018-04-05	2018-05-16	Tolklofos metylu	mg/kg	0.03	p.0,03		-	1	Eurofins	SFBA0-7	3.51	54.695007	18.422677	54.693555	18.426393	54.691556	18.425256	54.693084	18.419877
Michał Korthals	8	19	19_44/2_w2	86/18/1029	19_44/2	2018-04-05	2018-05-16	Tolilofluanid	mg/kg	0.03	p.0,03		-	1	Eurofins	SFBA0-7	3.51	54.695007	18.422677	54.693555	18.426393	54.691556	18.425256	54.693084	18.419877
Michał Korthals	8	19	19_44/2_w2	86/18/1029	19_44/2	2018-04-05	2018-05-16	Toxaphene Parlar 26	mg/kg	0.01	p.0,01		-	1	Eurofins	SFBA0-7	3.51	54.695007	18.422677	54.693555	18.426393	54.691556	18.425256	54.693084	18.419877
Michał Korthals	8	19	19_44/2_w2	86/18/1029	19_44/2	2018-04-05	2018-05-16	Toxaphene Parlar 50	mg/kg	0.01	p.0,01		-	1	Eurofins	SFBA0-7	3.51	54.695007	18.422677	54.693555	18.426393	54.691556	18.425256	54.693084	18.419877
Michał Korthals	8	19	19_44/2_w2	86/18/1029	19_44/2	2018-04-05	2018-05-16	Toxaphene Parlar 62	mg/kg	0.01	p.0,01		-	1	Eurofins	SFBA0-7	3.51	54.695007	18.422677	54.693555	18.426393	54.691556	18.425256	54.693084	18.419877
Michał Korthals	8	19	19_44/2_w2	86/18/1029	19_44/2	2018-04-05	2018-05-16	Transfluthrin	mg/kg	0.03	p.0,03		-	1	Eurofins	SFBA0-7	3.51	54.695007	18.422677	54.693555	18.426393	54.691556	18.425256	54.693084	18.419877
Michał Korthals	8	19	19_44/2_w2	86/18/1029	19_44/2	2018-04-05	2018-05-16	Triadimefon	mg/kg	0.03	p.0,03		-	1	Eurofins	SFBA0-7	3.51	54.695007	18.422677	54.693555	18.426393	54.691556	18.425256	54.693084	18.419877
Michał Korthals	8	19	19_44/2_w2	86/18/1029	19_44/2	2018-04-05	2018-05-16	Triadimenol	mg/kg	0.15	p.0,15		-	1	Eurofins	SFBA0-7	3.51	54.695007	18.422677	54.693555	18.426393	54.691556	18.425256	54.693084	18.419877
Michał Korthals	8	19	19_44/2_w2	86/18/1029	19_44/2	2018-04-05	2018-05-16	Triadimenol/Triadimefon(suma)	mg/kg	0.15	p.0,15		-	1	Eurofins	SFBA0-7	3.51	54.695007	18.422677	54.693555	18.426393	54.691556	18.425256	54.693084	18.419877
Michał Korthals	8	19	19_44/2_w2	86/18/1029	19_44/2	2018-04-05	2018-05-16	Trialat	mg/kg	0.03	p.0,03		-	1	Eurofins	SFBA0-7	3.51	54.695007	18.422677	54.693555	18.426393	54.691556	18.425256	54.693084	18.419877
Michał Korthals	8	19	19_44/2_w2	86/18/1029	19_44/2	2018-04-05	2018-05-16	Triamiphos	mg/kg	0.075	p.0,075		-	1	Eurofins	SFBA0-7	3.51	54.695007	18.422677	54.693555	18.426393	54.691556	18.425256	54.693084	18.419877
Michał Korthals	8	19	19_44/2_w2	86/18/1029	19_44/2	2018-04-05	2018-05-16	Triazofos	mg/kg	0.06	p.0,06		-	1	Eurofins	SFBA0-7	3.51	54.695007	18.422677	54.693555	18.426393	54.691556	18.425256	54.693084	18.419877
Michał Korthals	8	19	19_44/2_w2	86/18/1029	19_44/2	2018-04-05	2018-05-16	Tribufos	mg/kg	0.03	p.0,03		-	1	Eurofins	SFBA0-7	3.51	54.695007	18.422677	54.693555	18.426393	54.691556	18.425256	54.693084	18.419877
Michał Korthals	8	19	19_44/2_w2	86/18/1029	19_44/2	2018-04-05	2018-05-16	Trichloronat	mg/kg	0.015	p.0,015		-	1	Eurofins	SFBA0-7	3.51	54.695007	18.422677	54.693555	18.426393	54.691556	18.425256	54.693084	18.419877
Michał Korthals	8	19	19_44/2_w2	86/18/1029	19_44/2	2018-04-05	2018-05-16	Tridiphane	mg/kg	0.15	p.0,15		-	1	Eurofins	SFBA0-7	3.51	54.695007	18.422677	54.693555	18.426393	54.691556	18.425256	54.693084	18.419877
Michał Korthals	8	19	19_44/2_w2	86/18/1029	19_44/2	2018-04-05	2018-05-16	Trifloksystrobina	mg/kg	0.03	p.0,03		-	1	Eurofins	SFBA0-7	3.51	54.695007	18.422677	54.693555	18.426393	54.691556	18.425256	54.693084	18.419877
Michał Korthals	8	19	19_44/2_w2	86/18/1029	19_44/2	2018-04-05	2018-05-16	Trifluralina	mg/kg	0.015	p.0,015		-	1	Eurofins	SFBA0-7	3.51	54.695007	18.422677	54.693555	18.426393	54.691556	18.425256	54.693084	18.419877
Michał Korthals	8	19	19_44/2_w2	86/18/1029	19_44/2	2018-04-05	2018-05-16	Vamidothion	mg/kg	0.03	p.0,03		-	1	Eurofins	SFBA0-7	3.51	54.695007	18.422677	54.693555	18.426393	54.691556	18.425256	54.693084	18.419877
Michał Korthals	8	19	19_44/2_w2	86/18/1029	19_44/2	2018-04-05	2018-05-16	Winklozolina	mg/kg	0.015	p.0,015		-	1	Eurofins	SFBA0-7	3.51	54.695007	18.422677	54.693555	18.426393	54.691556	18.425256	54.693084	18.419877
Michał Korthals	8	19	19_44/2_w2	86/18/1029	19_44/2	2018-04-05	2018-05-16	Glifosat	mg/kg	0.05	p.0,05		-	1	Eurofins	SF130-4	3.51	54.695007	18.422677	54.693555	18.426393	54.691556	18.425256	54.693084	18.419877
Michał Korthals	8	19	19_44/2_w2	86/18/1029	19_44/2	2018-04-05	2018-05-16	Glufosynat	mg/kg	0.05	p.0.05		-	1	Eurofins	SF130-4	3.51	54.695007	18.422677	54.693555	18.426393	54.691556	18.425256	54.693084	18.419877
Michał Korthals	8	19	19_44/2_w2	86/18/1029	19_44/2	2018-04-05	2018-05-16	Kwas aminometylofosfonowy (AMPA)	mg/kg	0.05	0.11	±	0.055	0	Eurofins	SF130-4	3.51	54.695007	18.422677	54.693555	18.426393	54.691556	18.425256	54.693084	18.419877
Michał Korthals	8	19	19_44/2_w2	168/18/1575	19_44/2	2018-06-22	2018-07-03	2,4,5-T-Methylester	mg/kg	0.03	p.0,03		-	1	Eurofins	SFBA0-7	3.51	54.695007	18.422677	54.693555	18.426393	54.691556	18.425256	54.693084	18.419877
Michał Korthals	8	19	19_44/2_w2	168/18/1575	19_44/2	2018-06-22	2018-07-03	2,4-D-Methylester	mg/kg	0.03	p.0,03		-	1	Eurofins	SFBA0-7	3.51	54.695007	18.422677	54.693555	18.426393	54.691556	18.425256	54.693084	18.419877
Michał Korthals	8	19	19_44/2_w2	168/18/1575	19_44/2	2018-06-22	2018-07-03	Acetochlor	mg/kg	0.15	p.0,15		-	1	Eurofins	SFBA0-7	3.51	54.695007	18.422677	54.693555	18.426393	54.691556	18.425256	54.693084	18.419877
Michał Korthals	8	19	19_44/2_w2	168/18/1575	19_44/2	2018-06-22	2018-07-03	Aclonifen	mg/kg	0.06	p.0,06		-	1	Eurofins	SFBA0-7	3.51	54.695007	18.422677	54.693555	18.426393	54.691556	18.425256	54.693084	18.419877
Michał Korthals	8	19	19_44/2_w2	168/18/1575	19_44/2	2018-06-22	2018-07-03	Akrynatryna	mg/kg	0.03	p.0,03		-	1	Eurofins	SFBA0-7	3.51	54.695007	18.422677	54.693555	18.426393	54.691556	18.425256	54.693084	18.419877
Michał Korthals	8	19	19_44/2_w2	168/18/1575	19_44/2	2018-06-22	2018-07-03	Alachlor	mg/kg	0.03	p.0,03		-	1	Eurofins	SFBA0-7	3.51	54.695007	18.422677	54.693555	18.426393	54.691556	18.425256	54.693084	18.419877
Michał Korthals	8	19	19_44/2_w2	168/18/1575	19_44/2	2018-06-22	2018-07-03	Aldryna	mg/kg	0.015	p.0,015		-	1	Eurofins	SFBA0-7	3.51	54.695007	18.422677	54.693555	18.426393	54.691556	18.425256	54.693084	18.419877
Michał Korthals	8	19	19_44/2_w2	168/18/1575	19_44/2	2018-06-22	2018-07-03	Aldryna+Dieldryna	mg/kg	0.015	p.0,015		-	1	Eurofins	SFBA0-7	3.51	54.695007	18.422677	54.693555	18.426393	54.691556	18.425256	54.693084	18.419877
Michał Korthals	8	19	19_44/2_w2	168/18/1575	19_44/2	2018-06-22	2018-07-03	Alletryna	mg/kg	0.03	p.0,03		-	1	Eurofins	SFBA0-7	3.51	54.695007	18.422677	54.693555	18.426393	54.691556	18.425256	54.693084	18.419877
Michał Korthals	8	19	19_44/2_w2	168/18/1575	19_44/2	2018-06-22	2018-07-03	Amidithion	mg/kg	0.03	p.0,03		-	1	Eurofins	SFBA0-7	3.51	54.695007	18.422677	54.693555	18.426393	54.691556	18.425256	54.693084	18.419877
Michał Korthals	8	19	19_44/2_w2	168/18/1575	19_44/2	2018-06-22	2018-07-03	Antrachinon	mg/kg	0.06	0.18	±	0.09	0	Eurofins	SFBA0-7	3.51	54.695007	18.422677	54.693555	18.426393	54.691556	18.425256	54.693084	18.419877
Michał Korthals	8	19	19_44/2_w2	168/18/1575	19_44/2	2018-06-22	2018-07-03	Atrazyna	mg/kg	0.15	p.0,15		-	1	Eurofins	SFBA0-7	3.51	54.695007	18.422677	54.693555	18.426393	54.691556	18.425256	54.693084	18.419877
Michał Korthals	8	19	19_44/2_w2	168/18/1575	19_44/2	2018-06-22	2018-07-03	Azakonazol	mg/kg	0.03	p.0,03		-	1	Eurofins	SFBA0-7	3.51	54.695007	18.422677	54.693555	18.426393	54.691556	18.425256	54.693084	18.419877
Michał Korthals	8	19	19_44/2_w2	168/18/1575	19_44/2	2018-06-22	2018-07-03	Azynofos etylowy	mg/kg	0.03	p.0,03		-	1	Eurofins	SFBA0-7	3.51	54.695007	18.422677	54.693555	18.426393	54.691556	18.425256	54.693084	18.419877
Michał Korthals	8	19	19_44/2_w2	168/18/1575	19_44/2	2018-06-22	2018-07-03	Azynofos metylowy	mg/kg	0.03	p.0,03		-	1	Eurofins	SFBA0-7	3.51	54.695007	18.422677	54.693555	18.426393	54.691556	18.425256	54.693084	18.419877
Michał Korthals	8	19	19_44/2_w2	168/18/1575	19_44/2	2018-06-22	2018-07-03	Azoksystrobina	mg/kg	0.03	p.0,03		-	1	Eurofins	SFBA0-7	3.51	54.695007	18.422677	54.693555	18.426393	54.691556	18.425256	54.693084	18.419877
Michał Korthals	8	19	19_44/2_w2	168/18/1575	19_44/2	2018-06-22	2018-07-03	Benfluralin	mg/kg	0.015	p.0,015		-	1	Eurofins	SFBA0-7	3.51	54.695007	18.422677	54.693555	18.426393	54.691556	18.425256	54.693084	18.419877
Michał Korthals	8	19	19_44/2_w2	168/18/1575	19_44/2	2018-06-22	2018-07-03	Benoxacor	mg/kg	0.03	p.0,03		-	1	Eurofins	SFBA0-7	3.51	54.695007	18.422677	54.693555	18.426393	54.691556	18.425256	54.693084	18.419877
Michał Korthals	8	19	19_44/2_w2	168/18/1575	19_44/2	2018-06-22	2018-07-03	Benzoylprop-ethyl	mg/kg	0.15	p.0,15		-	1	Eurofins	SFBA0-7	3.51	54.695007	18.422677	54.693555	18.426393	54.691556	18.425256	54.693084	18.419877
Michał Korthals	8	19	19_44/2_w2	168/18/1575	19_44/2	2018-06-22	2018-07-03	Biofenox	mg/kg	0.03	p.0,03		-	1	Eurofins	SFBA0-7	3.51	54.695007	18.422677	54.693555	18.426393	54.691556	18.425256	54.693084	18.419877
Michał Korthals	8	19	19_44/2_w2	168/18/1575	19_44/2	2018-06-22	2018-07-03	Binapacryl	mg/kg	0.015	p.0,15		-	1	Eurofins	SFBA0-7	3.51	54.695007	18.422677	54.693555	18.426393	54.691556	18.425256	54.693084	18.419877
Michał Korthals	8	19	19_44/2_w2	168/18/1575	19_44/2	2018-06-22	2018-07-03	Bifentryna	mg/kg	0.06	p.0,06		-	1	Eurofins	SFBA0-7	3.51	54.695007	18.422677	54.693555	18.426393	54.691556	18.425256	54.693084	18.419877
Michał Korthals	8	19	19_44/2_w2	168/18/1575	19_44/2	2018-06-22	2018-07-03	Bitertanol	mg/kg	0.15	p.0,15		-	1	Eurofins	SFBA0-7	3.51	54.695007	18.422677	54.693555	18.426393	54.691556	18.425256	54.693084	18.419877
Michał Korthals	8	19	19_44/2_w2	168/18/1575	19_44/2	2018-06-22	2018-07-03	Boskalid	mg/kg	0.09	p.0,09		-	1	Eurofins	SFBA0-7	3.51	54.695007	18.422677	54.693555	18.426393	54.691556	18.425256	54.693084	18.419877
Michał Korthals	8	19	19_44/2_w2	168/18/1575	19_44/2	2018-06-22	2018-07-03	Bromofenvinphos	mg/kg	0.03	p.0,03		-	1	Eurofins	SFBA0-7	3.51	54.695007	18.422677	54.693555	18.426393	54.691556	18.425256	54.693084	18.419877
Michał Korthals	8	19	19_44/2_w2	168/18/1575	19_44/2	2018-06-22	2018-07-03	Bromocyclen	mg/kg	0.03	p.0,03		-	1	Eurofins	SFBA0-7	3.51	54.695007	18.422677	54.693555	18.426393	54.691556	18.425256	54.693084	18.419877
Michał Korthals	8	19	19_44/2_w2	168/18/1575	19_44/2	2018-06-22	2018-07-03	Bromofos metylowy	mg/kg	0.015	p.0,015		-	1	Eurofins	SFBA0-7	3.51	54.695007	18.422677	54.693555	18.426393	54.691556	18.425256	54.693084	18.419877
Michał Korthals	8	19	19_44/2_w2	168/18/1575	19_44/2	2018-06-22	2018-07-03	Bromofos etylowy	mg/kg	0.015	p.0,015		-	1	Eurofins	SFBA0-7	3.51	54.695007	18.422677	54.693555	18.426393	54.691556	18.425256	54.693084	18.419877
Michał Korthals	8	19	19_44/2_w2	168/18/1575	19_44/2	2018-06-22	2018-07-03	Bromopropylat	mg/kg	0.03	p.0,03		-	1	Eurofins	SFBA0-7	3.51	54.695007	18.422677	54.693555	18.426393	54.691556	18.425256	54.693084	18.419877
Michał Korthals	8	19	19_44/2_w2	168/18/1575	19_44/2	2018-06-22	2018-07-03	Buprofezyna	mg/kg	0.15	p.0,15		-	1	Eurofins	SFBA0-7	3.51	54.695007	18.422677	54.693555	18.426393	54.691556	18.425256	54.693084	18.419877
Michał Korthals	8	19	19_44/2_w2	168/18/1575	19_44/2	2018-06-22	2018-07-03	Butachlor	mg/kg	0.03	p.0,03		-	1	Eurofins	SFBA0-7	3.51	54.695007	18.422677	54.693555	18.426393	54.691556	18.425256	54.693084	18.419877
Michał Korthals	8	19	19_44/2_w2	168/18/1575	19_44/2	2018-06-22	2018-07-03	Butamifos	mg/kg	0.015	p.0,015		-	1	Eurofins	SFBA0-7	3.51	54.695007	18.422677	54.693555	18.426393	54.691556	18.425256	54.693084	18.419877
Michał Korthals	8	19	19_44/2_w2	168/18/1575	19_44/2	2018-06-22	2018-07-03	Butralin	mg/kg	0.03	p.0,03		-	1	Eurofins	SFBA0-7	3.51	54.695007	18.422677	54.693555	18.426393	54.691556	18.425256	54.693084	18.419877
Michał Korthals	8	19	19_44/2_w2	168/18/1575	19_44/2	2018-06-22	2018-07-03	Kadusafos	mg/kg	0.03	p.0,03		-	1	Eurofins	SFBA0-7	3.51	54.695007	18.422677	54.693555	18.426393	54.691556	18.425256	54.693084	18.419877
Michał Korthals	8	19	19_44/2_w2	168/18/1575	19_44/2	2018-06-22	2018-07-03	Kaptafol	mg/kg	0.03	p.0,03		-	1	Eurofins	SFBA0-7	3.51	54.695007	18.422677	54.693555	18.426393	54.691556	18.425256	54.693084	18.419877
Michał Korthals	8	19	19_44/2_w2	168/18/1575	19_44/2	2018-06-22	2018-07-03	Kaptan	mg/kg	0.03	p.0,03		-	1	Eurofins	SFBA0-7	3.51	54.695007	18.422677	54.693555	18.426393	54.691556	18.425256	54.693084	18.419877
Michał Korthals	8	19	19_44/2_w2	168/18/1575	19_44/2	2018-06-22	2018-07-03	Karbofenotion	mg/kg	0.015	p.0,015		-	1	Eurofins	SFBA0-7	3.51	54.695007	18.422677	54.693555	18.426393	54.691556	18.425256	54.693084	18.419877
Michał Korthals	8	19	19_44/2_w2	168/18/1575	19_44/2	2018-06-22	2018-07-03	Carbophenothion-methyl	mg/kg	0.03	p.0,03		-	1	Eurofins	SFBA0-7	3.51	54.695007	18.422677	54.693555	18.426393	54.691556	18.425256	54.693084	18.419877
Michał Korthals	8	19	19_44/2_w2	168/18/1575	19_44/2	2018-06-22	2018-07-03	Carfentrazone-ethyl	mg/kg	0.03	p.0,03		-	1	Eurofins	SFBA0-7	3.51	54.695007	18.422677	54.693555	18.426393	54.691556	18.425256	54.693084	18.419877
Michał Korthals	8	19	19_44/2_w2	168/18/1575	19_44/2	2018-06-22	2018-07-03	Chinometionat	mg/kg	0.015	p.0,015		-	1	Eurofins	SFBA0-7	3.51	54.695007	18.422677	54.693555	18.426393	54.691556	18.425256	54.693084	18.419877
Michał Korthals	8	19	19_44/2_w2	168/18/1575	19_44/2	2018-06-22	2018-07-03	Chlorbenzyd	mg/kg	0.015	p.0,015		-	1	Eurofins	SFBA0-7	3.51	54.695007	18.422677	54.693555	18.426393	54.691556	18.425256	54.693084	18.419877
Michał Korthals	8	19	19_44/2_w2	168/18/1575	19_44/2	2018-06-22	2018-07-03	Chlordane (total)	mg/kg	0.03	p.0,03		-	1	Eurofins	SFBA0-7	3.51	54.695007	18.422677	54.693555	18.426393	54.691556	18.425256	54.693084	18.419877
Michał Korthals	8	19	19_44/2_w2	168/18/1575	19_44/2	2018-06-22	2018-07-03	Chlordan,cis-	mg/kg	0.015	p.0,015		-	1	Eurofins	SFBA0-7	3.51	54.695007	18.422677	54.693555	18.426393	54.691556	18.425256	54.693084	18.419877
Michał Korthals	8	19	19_44/2_w2	168/18/1575	19_44/2	2018-06-22	2018-07-03	Chlordan,oxy-	mg/kg	0.03	p.0,03		-	1	Eurofins	SFBA0-7	3.51	54.695007	18.422677	54.693555	18.426393	54.691556	18.425256	54.693084	18.419877
Michał Korthals	8	19	19_44/2_w2	168/18/1575	19_44/2	2018-06-22	2018-07-03	Chlordan,gamma/trans-	mg/kg	0.015	p.0,015		-	1	Eurofins	SFBA0-7	3.51	54.695007	18.422677	54.693555	18.426393	54.691556	18.425256	54.693084	18.419877
Michał Korthals	8	19	19_44/2_w2	168/18/1575	19_44/2	2018-06-22	2018-07-03	Chlordecon	mg/kg	0.03	p.0,03		-	1	Eurofins	SFBA0-7	3.51	54.695007	18.422677	54.693555	18.426393	54.691556	18.425256	54.693084	18.419877
Michał Korthals	8	19	19_44/2_w2	168/18/1575	19_44/2	2018-06-22	2018-07-03	Chlorethoksyfos	mg/kg	0.015	p.0,015		-	1	Eurofins	SFBA0-7	3.51	54.695007	18.422677	54.693555	18.426393	54.691556	18.425256	54.693084	18.419877
Michał Korthals	8	19	19_44/2_w2	168/18/1575	19_44/2	2018-06-22	2018-07-03	Chlorfenapyr	mg/kg	0.015	p.0,015		-	1	Eurofins	SFBA0-7	3.51	54.695007	18.422677	54.693555	18.426393	54.691556	18.425256	54.693084	18.419877
Michał Korthals	8	19	19_44/2_w2	168/18/1575	19_44/2	2018-06-22	2018-07-03	Chlorfenprop-methyl	mg/kg	0.03	p.0,03		-	1	Eurofins	SFBA0-7	3.51	54.695007	18.422677	54.693555	18.426393	54.691556	18.425256	54.693084	18.419877
Michał Korthals	8	19	19_44/2_w2	168/18/1575	19_44/2	2018-06-22	2018-07-03	Chlorfenson	mg/kg	0.015	p.0,015		-	1	Eurofins	SFBA0-7	3.51	54.695007	18.422677	54.693555	18.426393	54.691556	18.425256	54.693084	18.419877
Michał Korthals	8	19	19_44/2_w2	168/18/1575	19_44/2	2018-06-22	2018-07-03	Chlorfenwinfos	mg/kg	0.03	p.0,03		-	1	Eurofins	SFBA0-7	3.51	54.695007	18.422677	54.693555	18.426393	54.691556	18.425256	54.693084	18.419877
Michał Korthals	8	19	19_44/2_w2	168/18/1575	19_44/2	2018-06-22	2018-07-03	Chloridazon	mg/kg	0.03	p.0,03		-	1	Eurofins	SFBA0-7	3.51	54.695007	18.422677	54.693555	18.426393	54.691556	18.425256	54.693084	18.419877
Michał Korthals	8	19	19_44/2_w2	168/18/1575	19_44/2	2018-06-22	2018-07-03	Chlormephos	mg/kg	0.015	p.0,015		-	1	Eurofins	SFBA0-7	3.51	54.695007	18.422677	54.693555	18.426393	54.691556	18.425256	54.693084	18.419877
Michał Korthals	8	19	19_44/2_w2	168/18/1575	19_44/2	2018-06-22	2018-07-03	Chlorobenzylat	mg/kg	0.015	p.0,015		-	1	Eurofins	SFBA0-7	3.51	54.695007	18.422677	54.693555	18.426393	54.691556	18.425256	54.693084	18.419877
Michał Korthals	8	19	19_44/2_w2	168/18/1575	19_44/2	2018-06-22	2018-07-03	Chloroneb	mg/kg	0.03	p.0,03		-	1	Eurofins	SFBA0-7	3.51	54.695007	18.422677	54.693555	18.426393	54.691556	18.425256	54.693084	18.419877
Michał Korthals	8	19	19_44/2_w2	168/18/1575	19_44/2	2018-06-22	2018-07-03	Chloropropylat	mg/kg	0.015	p.0,015		-	1	Eurofins	SFBA0-7	3.51	54.695007	18.422677	54.693555	18.426393	54.691556	18.425256	54.693084	18.419877
Michał Korthals	8	19	19_44/2_w2	168/18/1575	19_44/2	2018-06-22	2018-07-03	Chlorotalonil	mg/kg	0.015	p.0,015		-	1	Eurofins	SFBA0-7	3.51	54.695007	18.422677	54.693555	18.426393	54.691556	18.425256	54.693084	18.419877
Michał Korthals	8	19	19_44/2_w2	168/18/1575	19_44/2	2018-06-22	2018-07-03	Chlorpiryfos etylowy	mg/kg	0.015	0.015	±	0.008	0	Eurofins	SFBA0-7	3.51	54.695007	18.422677	54.693555	18.426393	54.691556	18.425256	54.693084	18.419877
Michał Korthals	8	19	19_44/2_w2	168/18/1575	19_44/2	2018-06-22	2018-07-03	Chlorpiryfos metylowy	mg/kg	0.015	p.0,015		-	1	Eurofins	SFBA0-7	3.51	54.695007	18.422677	54.693555	18.426393	54.691556	18.425256	54.693084	18.419877
Michał Korthals	8	19	19_44/2_w2	168/18/1575	19_44/2	2018-06-22	2018-07-03	Chlorthal-dimethyl	mg/kg	0.015	p.0,015		-	1	Eurofins	SFBA0-7	3.51	54.695007	18.422677	54.693555	18.426393	54.691556	18.425256	54.693084	18.419877
Michał Korthals	8	19	19_44/2_w2	168/18/1575	19_44/2	2018-06-22	2018-07-03	Chlorotion	mg/kg	0.03	p.0,03		-	1	Eurofins	SFBA0-7	3.51	54.695007	18.422677	54.693555	18.426393	54.691556	18.425256	54.693084	18.419877
Michał Korthals	8	19	19_44/2_w2	168/18/1575	19_44/2	2018-06-22	2018-07-03	Chlortiofos	mg/kg	0.015	p.0,015		-	1	Eurofins	SFBA0-7	3.51	54.695007	18.422677	54.693555	18.426393	54.691556	18.425256	54.693084	18.419877
Michał Korthals	8	19	19_44/2_w2	168/18/1575	19_44/2	2018-06-22	2018-07-03	Chlozolinate	mg/kg	0.03	p.0,03		-	1	Eurofins	SFBA0-7	3.51	54.695007	18.422677	54.693555	18.426393	54.691556	18.425256	54.693084	18.419877
Michał Korthals	8	19	19_44/2_w2	168/18/1575	19_44/2	2018-06-22	2018-07-03	Cinidon-ethyl	mg/kg	0.03	p.0,03		-	1	Eurofins	SFBA0-7	3.51	54.695007	18.422677	54.693555	18.426393	54.691556	18.425256	54.693084	18.419877
Michał Korthals	8	19	19_44/2_w2	168/18/1575	19_44/2	2018-06-22	2018-07-03	Clodinafop-propargyl	mg/kg	0.09	p.0,09		-	1	Eurofins	SFBA0-7	3.51	54.695007	18.422677	54.693555	18.426393	54.691556	18.425256	54.693084	18.419877
Michał Korthals	8	19	19_44/2_w2	168/18/1575	19_44/2	2018-06-22	2018-07-03	Kumafos	mg/kg	0.015	p.0,015		-	1	Eurofins	SFBA0-7	3.51	54.695007	18.422677	54.693555	18.426393	54.691556	18.425256	54.693084	18.419877
Michał Korthals	8	19	19_44/2_w2	168/18/1575	19_44/2	2018-06-22	2018-07-03	Crotoxyphos	mg/kg	0.03	p.0,03		-	1	Eurofins	SFBA0-7	3.51	54.695007	18.422677	54.693555	18.426393	54.691556	18.425256	54.693084	18.419877
Michał Korthals	8	19	19_44/2_w2	168/18/1575	19_44/2	2018-06-22	2018-07-03	Cyjanofenfos	mg/kg	0.03	p.0,03		-	1	Eurofins	SFBA0-7	3.51	54.695007	18.422677	54.693555	18.426393	54.691556	18.425256	54.693084	18.419877
Michał Korthals	8	19	19_44/2_w2	168/18/1575	19_44/2	2018-06-22	2018-07-03	Cyanophos	mg/kg	0.03	p.0,03		-	1	Eurofins	SFBA0-7	3.51	54.695007	18.422677	54.693555	18.426393	54.691556	18.425256	54.693084	18.419877
Michał Korthals	8	19	19_44/2_w2	168/18/1575	19_44/2	2018-06-22	2018-07-03	Cyflutryna	mg/kg	0.03	p.0,03		-	1	Eurofins	SFBA0-7	3.51	54.695007	18.422677	54.693555	18.426393	54.691556	18.425256	54.693084	18.419877
Michał Korthals	8	19	19_44/2_w2	168/18/1575	19_44/2	2018-06-22	2018-07-03	lambda-Cyhalotryna	mg/kg	0.03	p.0,03		-	1	Eurofins	SFBA0-7	3.51	54.695007	18.422677	54.693555	18.426393	54.691556	18.425256	54.693084	18.419877
Michał Korthals	8	19	19_44/2_w2	168/18/1575	19_44/2	2018-06-22	2018-07-03	Cypermetryna	mg/kg	0.015	p.0,015		-	1	Eurofins	SFBA0-7	3.51	54.695007	18.422677	54.693555	18.426393	54.691556	18.425256	54.693084	18.419877
Michał Korthals	8	19	19_44/2_w2	168/18/1575	19_44/2	2018-06-22	2018-07-03	Cyphenothrin	mg/kg	0.03	p.0,03		-	1	Eurofins	SFBA0-7	3.51	54.695007	18.422677	54.693555	18.426393	54.691556	18.425256	54.693084	18.419877
Michał Korthals	8	19	19_44/2_w2	168/18/1575	19_44/2	2018-06-22	2018-07-03	Cyprokonazol	mg/kg	0.12	p.0,12		-	1	Eurofins	SFBA0-7	3.51	54.695007	18.422677	54.693555	18.426393	54.691556	18.425256	54.693084	18.419877
Michał Korthals	8	19	19_44/2_w2	168/18/1575	19_44/2	2018-06-22	2018-07-03	DDD-o,p	mg/kg	0.015	p.0,015		-	1	Eurofins	SFBA0-7	3.51	54.695007	18.422677	54.693555	18.426393	54.691556	18.425256	54.693084	18.419877
Michał Korthals	8	19	19_44/2_w2	168/18/1575	19_44/2	2018-06-22	2018-07-03	DDE-o,p	mg/kg	0.015	p.0,015		-	1	Eurofins	SFBA0-7	3.51	54.695007	18.422677	54.693555	18.426393	54.691556	18.425256	54.693084	18.419877
Michał Korthals	8	19	19_44/2_w2	168/18/1575	19_44/2	2018-06-22	2018-07-03	DDT(p,p'-DDT+o,p'-DDT+p.p'-DDE+p,p'-TDE)	mg/kg	0.015	p.0,015		-	1	Eurofins	SFBA0-7	3.51	54.695007	18.422677	54.693555	18.426393	54.691556	18.425256	54.693084	18.419877
Michał Korthals	8	19	19_44/2_w2	168/18/1575	19_44/2	2018-06-22	2018-07-03	Deltametryna	mg/kg	0.015	p.0,015		-	1	Eurofins	SFBA0-7	3.51	54.695007	18.422677	54.693555	18.426393	54.691556	18.425256	54.693084	18.419877
Michał Korthals	8	19	19_44/2_w2	168/18/1575	19_44/2	2018-06-22	2018-07-03	Dialifos	mg/kg	0.03	p.0,03		-	1	Eurofins	SFBA0-7	3.51	54.695007	18.422677	54.693555	18.426393	54.691556	18.425256	54.693084	18.419877
Michał Korthals	8	19	19_44/2_w2	168/18/1575	19_44/2	2018-06-22	2018-07-03	Di-allate	mg/kg	0.03	p.0,03		-	1	Eurofins	SFBA0-7	3.51	54.695007	18.422677	54.693555	18.426393	54.691556	18.425256	54.693084	18.419877
Michał Korthals	8	19	19_44/2_w2	168/18/1575	19_44/2	2018-06-22	2018-07-03	Diazynon	mg/kg	0.03	p.0,03		-	1	Eurofins	SFBA0-7	3.51	54.695007	18.422677	54.693555	18.426393	54.691556	18.425256	54.693084	18.419877
Michał Korthals	8	19	19_44/2_w2	168/18/1575	19_44/2	2018-06-22	2018-07-03	4,4-Dibromobenzophenone	mg/kg	0.03	p.0,03		-	1	Eurofins	SFBA0-7	3.51	54.695007	18.422677	54.693555	18.426393	54.691556	18.425256	54.693084	18.419877
Michał Korthals	8	19	19_44/2_w2	168/18/1575	19_44/2	2018-06-22	2018-07-03	Dicapthon	mg/kg	0.03	p.0,03		-	1	Eurofins	SFBA0-7	3.51	54.695007	18.422677	54.693555	18.426393	54.691556	18.425256	54.693084	18.419877
Michał Korthals	8	19	19_44/2_w2	168/18/1575	19_44/2	2018-06-22	2018-07-03	Dichlobenil	mg/kg	0.15	p.0,15		-	1	Eurofins	SFBA0-7	3.51	54.695007	18.422677	54.693555	18.426393	54.691556	18.425256	54.693084	18.419877
Michał Korthals	8	19	19_44/2_w2	168/18/1575	19_44/2	2018-06-22	2018-07-03	Dichlofention	mg/kg	0.03	p.0,03		-	1	Eurofins	SFBA0-7	3.51	54.695007	18.422677	54.693555	18.426393	54.691556	18.425256	54.693084	18.419877
Michał Korthals	8	19	19_44/2_w2	168/18/1575	19_44/2	2018-06-22	2018-07-03	Dichlofluanid	mg/kg	0.015	p.0,015		-	1	Eurofins	SFBA0-7	3.51	54.695007	18.422677	54.693555	18.426393	54.691556	18.425256	54.693084	18.419877
Michał Korthals	8	19	19_44/2_w2	168/18/1575	19_44/2	2018-06-22	2018-07-03	Dichloran	mg/kg	0.075	p.0,075		-	1	Eurofins	SFBA0-7	3.51	54.695007	18.422677	54.693555	18.426393	54.691556	18.425256	54.693084	18.419877
Michał Korthals	8	19	19_44/2_w2	168/18/1575	19_44/2	2018-06-22	2018-07-03	Dichlorfos	mg/kg	0.06	p.0,06		-	1	Eurofins	SFBA0-7	3.51	54.695007	18.422677	54.693555	18.426393	54.691556	18.425256	54.693084	18.419877
Michał Korthals	8	19	19_44/2_w2	168/18/1575	19_44/2	2018-06-22	2018-07-03	Diclofop-methyl	mg/kg	0.015	p.0,015		-	1	Eurofins	SFBA0-7	3.51	54.695007	18.422677	54.693555	18.426393	54.691556	18.425256	54.693084	18.419877
Michał Korthals	8	19	19_44/2_w2	168/18/1575	19_44/2	2018-06-22	2018-07-03	Dikofol (suma)	mg/kg	0.015	p.0,015		-	1	Eurofins	SFBA0-7	3.51	54.695007	18.422677	54.693555	18.426393	54.691556	18.425256	54.693084	18.419877
Michał Korthals	8	19	19_44/2_w2	168/18/1575	19_44/2	2018-06-22	2018-07-03	Dicofol,o,p-	mg/kg	0.015	p.0,015		-	1	Eurofins	SFBA0-7	3.51	54.695007	18.422677	54.693555	18.426393	54.691556	18.425256	54.693084	18.419877
Michał Korthals	8	19	19_44/2_w2	168/18/1575	19_44/2	2018-06-22	2018-07-03	Dicofol,p,p--	mg/kg	0.015	p.0,015		-	1	Eurofins	SFBA0-7	3.51	54.695007	18.422677	54.693555	18.426393	54.691556	18.425256	54.693084	18.419877
Michał Korthals	8	19	19_44/2_w2	168/18/1575	19_44/2	2018-06-22	2018-07-03	Dicrotophos	mg/kg	0.03	p.0,03		-	1	Eurofins	SFBA0-7	3.51	54.695007	18.422677	54.693555	18.426393	54.691556	18.425256	54.693084	18.419877
Michał Korthals	8	19	19_44/2_w2	168/18/1575	19_44/2	2018-06-22	2018-07-03	Dieldryna	mg/kg	0.015	p.0,015		-	1	Eurofins	SFBA0-7	3.51	54.695007	18.422677	54.693555	18.426393	54.691556	18.425256	54.693084	18.419877
Michał Korthals	8	19	19_44/2_w2	168/18/1575	19_44/2	2018-06-22	2018-07-03	Dienochlor	mg/kg	0.03	p.0,03		-	1	Eurofins	SFBA0-7	3.51	54.695007	18.422677	54.693555	18.426393	54.691556	18.425256	54.693084	18.419877
Michał Korthals	8	19	19_44/2_w2	168/18/1575	19_44/2	2018-06-22	2018-07-03	Difenokonazol	mg/kg	0.045	p.0,045		-	1	Eurofins	SFBA0-7	3.51	54.695007	18.422677	54.693555	18.426393	54.691556	18.425256	54.693084	18.419877
Michał Korthals	8	19	19_44/2_w2	168/18/1575	19_44/2	2018-06-22	2018-07-03	Diflufenican	mg/kg	0.03	p.0,03		-	1	Eurofins	SFBA0-7	3.51	54.695007	18.422677	54.693555	18.426393	54.691556	18.425256	54.693084	18.419877
Michał Korthals	8	19	19_44/2_w2	168/18/1575	19_44/2	2018-06-22	2018-07-03	Dimefox	mg/kg	0.15	p.0,15		-	1	Eurofins	SFBA0-7	3.51	54.695007	18.422677	54.693555	18.426393	54.691556	18.425256	54.693084	18.419877
Michał Korthals	8	19	19_44/2_w2	168/18/1575	19_44/2	2018-06-22	2018-07-03	Dimetrachlor	mg/kg	0.03	p.0,03		-	1	Eurofins	SFBA0-7	3.51	54.695007	18.422677	54.693555	18.426393	54.691556	18.425256	54.693084	18.419877
Michał Korthals	8	19	19_44/2_w2	168/18/1575	19_44/2	2018-06-22	2018-07-03	Dimethipine	mg/kg	0.03	p.0,03		-	1	Eurofins	SFBA0-7	3.51	54.695007	18.422677	54.693555	18.426393	54.691556	18.425256	54.693084	18.419877
Michał Korthals	8	19	19_44/2_w2	168/18/1575	19_44/2	2018-06-22	2018-07-03	Dimetoat	mg/kg	0.06	p.0,06		-	1	Eurofins	SFBA0-7	3.51	54.695007	18.422677	54.693555	18.426393	54.691556	18.425256	54.693084	18.419877
Michał Korthals	8	19	19_44/2_w2	168/18/1575	19_44/2	2018-06-22	2018-07-03	Dimetomorf	mg/kg	0.03	p.0,03		-	1	Eurofins	SFBA0-7	3.51	54.695007	18.422677	54.693555	18.426393	54.691556	18.425256	54.693084	18.419877
Michał Korthals	8	19	19_44/2_w2	168/18/1575	19_44/2	2018-06-22	2018-07-03	Dinikonazol	mg/kg	0.03	p.0,03		-	1	Eurofins	SFBA0-7	3.51	54.695007	18.422677	54.693555	18.426393	54.691556	18.425256	54.693084	18.419877
Michał Korthals	8	19	19_44/2_w2	168/18/1575	19_44/2	2018-06-22	2018-07-03	Dinitramine	mg/kg	0.03	p.0,03		-	1	Eurofins	SFBA0-7	3.51	54.695007	18.422677	54.693555	18.426393	54.691556	18.425256	54.693084	18.419877
Michał Korthals	8	19	19_44/2_w2	168/18/1575	19_44/2	2018-06-22	2018-07-03	Dinobuton	mg/kg	0.1	p.0.,1		-	1	Eurofins	SFBA0-7	3.51	54.695007	18.422677	54.693555	18.426393	54.691556	18.425256	54.693084	18.419877
Michał Korthals	8	19	19_44/2_w2	168/18/1575	19_44/2	2018-06-22	2018-07-03	Disulfoton	mg/kg	0.03	p.0,03		-	1	Eurofins	SFBA0-7	3.51	54.695007	18.422677	54.693555	18.426393	54.691556	18.425256	54.693084	18.419877
Michał Korthals	8	19	19_44/2_w2	168/18/1575	19_44/2	2018-06-22	2018-07-03	Disulfoton-sulfon	mg/kg	0.03	p.0,03		-	1	Eurofins	SFBA0-7	3.51	54.695007	18.422677	54.693555	18.426393	54.691556	18.425256	54.693084	18.419877
Michał Korthals	8	19	19_44/2_w2	168/18/1575	19_44/2	2018-06-22	2018-07-03	Ditalimfos	mg/kg	0.015	p.0,015		-	1	Eurofins	SFBA0-7	3.51	54.695007	18.422677	54.693555	18.426393	54.691556	18.425256	54.693084	18.419877
Michał Korthals	8	19	19_44/2_w2	168/18/1575	19_44/2	2018-06-22	2018-07-03	Edifenphos	mg/kg	0.03	p.0,03		-	1	Eurofins	SFBA0-7	3.51	54.695007	18.422677	54.693555	18.426393	54.691556	18.425256	54.693084	18.419877
Michał Korthals	8	19	19_44/2_w2	168/18/1575	19_44/2	2018-06-22	2018-07-03	Endosulfan (suma izomerów)	mg/kg	0.015	p.0,015		-	1	Eurofins	SFBA0-7	3.51	54.695007	18.422677	54.693555	18.426393	54.691556	18.425256	54.693084	18.419877
Michał Korthals	8	19	19_44/2_w2	168/18/1575	19_44/2	2018-06-22	2018-07-03	alfa-Endosulfan	mg/kg	0.015	p.0,015		-	1	Eurofins	SFBA0-7	3.51	54.695007	18.422677	54.693555	18.426393	54.691556	18.425256	54.693084	18.419877
Michał Korthals	8	19	19_44/2_w2	168/18/1575	19_44/2	2018-06-22	2018-07-03	Siarczan endosulfanu	mg/kg	0.015	p.0,015		-	1	Eurofins	SFBA0-7	3.51	54.695007	18.422677	54.693555	18.426393	54.691556	18.425256	54.693084	18.419877
Michał Korthals	8	19	19_44/2_w2	168/18/1575	19_44/2	2018-06-22	2018-07-03	beta-Endosulfan	mg/kg	0.015	p.0,015		-	1	Eurofins	SFBA0-7	3.51	54.695007	18.422677	54.693555	18.426393	54.691556	18.425256	54.693084	18.419877
Michał Korthals	8	19	19_44/2_w2	168/18/1575	19_44/2	2018-06-22	2018-07-03	Endryna	mg/kg	0.015	p.0,015		-	1	Eurofins	SFBA0-7	3.51	54.695007	18.422677	54.693555	18.426393	54.691556	18.425256	54.693084	18.419877
Michał Korthals	8	19	19_44/2_w2	168/18/1575	19_44/2	2018-06-22	2018-07-03	Ketoendrin-delta	mg/kg	0.015	p.0,015		-	1	Eurofins	SFBA0-7	3.51	54.695007	18.422677	54.693555	18.426393	54.691556	18.425256	54.693084	18.419877
Michał Korthals	8	19	19_44/2_w2	168/18/1575	19_44/2	2018-06-22	2018-07-03	EPN	mg/kg	0.03	p.0,03		-	1	Eurofins	SFBA0-7	3.51	54.695007	18.422677	54.693555	18.426393	54.691556	18.425256	54.693084	18.419877
Michał Korthals	8	19	19_44/2_w2	168/18/1575	19_44/2	2018-06-22	2018-07-03	Epoksykonazol	mg/kg	0.12	p.0,12		-	1	Eurofins	SFBA0-7	3.51	54.695007	18.422677	54.693555	18.426393	54.691556	18.425256	54.693084	18.419877
Michał Korthals	8	19	19_44/2_w2	168/18/1575	19_44/2	2018-06-22	2018-07-03	Etaconazole	mg/kg	0.06	p.0,06		-	1	Eurofins	SFBA0-7	3.51	54.695007	18.422677	54.693555	18.426393	54.691556	18.425256	54.693084	18.419877
Michał Korthals	8	19	19_44/2_w2	168/18/1575	19_44/2	2018-06-22	2018-07-03	Ethalfluralin	mg/kg	0.03	p.0,03		-	1	Eurofins	SFBA0-7	3.51	54.695007	18.422677	54.693555	18.426393	54.691556	18.425256	54.693084	18.419877
Michał Korthals	8	19	19_44/2_w2	168/18/1575	19_44/2	2018-06-22	2018-07-03	Etion	mg/kg	0.015	p.0,015		-	1	Eurofins	SFBA0-7	3.51	54.695007	18.422677	54.693555	18.426393	54.691556	18.425256	54.693084	18.419877
Michał Korthals	8	19	19_44/2_w2	168/18/1575	19_44/2	2018-06-22	2018-07-03	Ethiprol	mg/kg	0.06	p.0,06		-	1	Eurofins	SFBA0-7	3.51	54.695007	18.422677	54.693555	18.426393	54.691556	18.425256	54.693084	18.419877
Michał Korthals	8	19	19_44/2_w2	168/18/1575	19_44/2	2018-06-22	2018-07-03	Etofumesat	mg/kg	0.15	p.0,15		-	1	Eurofins	SFBA0-7	3.51	54.695007	18.422677	54.693555	18.426393	54.691556	18.425256	54.693084	18.419877
Michał Korthals	8	19	19_44/2_w2	168/18/1575	19_44/2	2018-06-22	2018-07-03	Etoprofos	mg/kg	0.015	p.0,015		-	1	Eurofins	SFBA0-7	3.51	54.695007	18.422677	54.693555	18.426393	54.691556	18.425256	54.693084	18.419877
Michał Korthals	8	19	19_44/2_w2	168/18/1575	19_44/2	2018-06-22	2018-07-03	Etridiazole	mg/kg	0.015	p.0,015		-	1	Eurofins	SFBA0-7	3.51	54.695007	18.422677	54.693555	18.426393	54.691556	18.425256	54.693084	18.419877
Michał Korthals	8	19	19_44/2_w2	168/18/1575	19_44/2	2018-06-22	2018-07-03	Etrimfos	mg/kg	0.015	p.0,015		-	1	Eurofins	SFBA0-7	3.51	54.695007	18.422677	54.693555	18.426393	54.691556	18.425256	54.693084	18.419877
Michał Korthals	8	19	19_44/2_w2	168/18/1575	19_44/2	2018-06-22	2018-07-03	Famophos	mg/kg	0.03	p.0,03		-	1	Eurofins	SFBA0-7	3.51	54.695007	18.422677	54.693555	18.426393	54.691556	18.425256	54.693084	18.419877
Michał Korthals	8	19	19_44/2_w2	168/18/1575	19_44/2	2018-06-22	2018-07-03	Famoksadon	mg/kg	0.03	p.0,03		-	1	Eurofins	SFBA0-7	3.51	54.695007	18.422677	54.693555	18.426393	54.691556	18.425256	54.693084	18.419877
Michał Korthals	8	19	19_44/2_w2	168/18/1575	19_44/2	2018-06-22	2018-07-03	Fenamidon	mg/kg	0.06	p.0,06		-	1	Eurofins	SFBA0-7	3.51	54.695007	18.422677	54.693555	18.426393	54.691556	18.425256	54.693084	18.419877
Michał Korthals	8	19	19_44/2_w2	168/18/1575	19_44/2	2018-06-22	2018-07-03	Fenamifos (suma izomerów)	mg/kg	0.06	p.0,06		-	1	Eurofins	SFBA0-7	3.51	54.695007	18.422677	54.693555	18.426393	54.691556	18.425256	54.693084	18.419877
Michał Korthals	8	19	19_44/2_w2	168/18/1575	19_44/2	2018-06-22	2018-07-03	Fenarimol	mg/kg	0.15	p.0,15		-	1	Eurofins	SFBA0-7	3.51	54.695007	18.422677	54.693555	18.426393	54.691556	18.425256	54.693084	18.419877
Michał Korthals	8	19	19_44/2_w2	168/18/1575	19_44/2	2018-06-22	2018-07-03	Fenbukonazol	mg/kg	0.03	p.0,03		-	1	Eurofins	SFBA0-7	3.51	54.695007	18.422677	54.693555	18.426393	54.691556	18.425256	54.693084	18.419877
Michał Korthals	8	19	19_44/2_w2	168/18/1575	19_44/2	2018-06-22	2018-07-03	Fenchlorazole	mg/kg	0.03	p.0,03		-	1	Eurofins	SFBA0-7	3.51	54.695007	18.422677	54.693555	18.426393	54.691556	18.425256	54.693084	18.419877
Michał Korthals	8	19	19_44/2_w2	168/18/1575	19_44/2	2018-06-22	2018-07-03	Fenchlorofos	mg/kg	0.015	p.0,015		-	1	Eurofins	SFBA0-7	3.51	54.695007	18.422677	54.693555	18.426393	54.691556	18.425256	54.693084	18.419877
Michał Korthals	8	19	19_44/2_w2	168/18/1575	19_44/2	2018-06-22	2018-07-03	Fenfluthrine	mg/kg	0.03	p.0,03		-	1	Eurofins	SFBA0-7	3.51	54.695007	18.422677	54.693555	18.426393	54.691556	18.425256	54.693084	18.419877
Michał Korthals	8	19	19_44/2_w2	168/18/1575	19_44/2	2018-06-22	2018-07-03	Fenheksamid	mg/kg	0.15	p.0,15		-	1	Eurofins	SFBA0-7	3.51	54.695007	18.422677	54.693555	18.426393	54.691556	18.425256	54.693084	18.419877
Michał Korthals	8	19	19_44/2_w2	168/18/1575	19_44/2	2018-06-22	2018-07-03	Fenitrotion	mg/kg	0.015	p.0,015		-	1	Eurofins	SFBA0-7	3.51	54.695007	18.422677	54.693555	18.426393	54.691556	18.425256	54.693084	18.419877
Michał Korthals	8	19	19_44/2_w2	168/18/1575	19_44/2	2018-06-22	2018-07-03	Fenoxaprop-ethyl	mg/kg	0.15	p.0,15		-	1	Eurofins	SFBA0-7	3.51	54.695007	18.422677	54.693555	18.426393	54.691556	18.425256	54.693084	18.419877
Michał Korthals	8	19	19_44/2_w2	168/18/1575	19_44/2	2018-06-22	2018-07-03	Fenpiclonil	mg/kg	0.15	p.0,15		-	1	Eurofins	SFBA0-7	3.51	54.695007	18.422677	54.693555	18.426393	54.691556	18.425256	54.693084	18.419877
Michał Korthals	8	19	19_44/2_w2	168/18/1575	19_44/2	2018-06-22	2018-07-03	Fenpropatryna	mg/kg	0.015	p.0,015		-	1	Eurofins	SFBA0-7	3.51	54.695007	18.422677	54.693555	18.426393	54.691556	18.425256	54.693084	18.419877
Michał Korthals	8	19	19_44/2_w2	168/18/1575	19_44/2	2018-06-22	2018-07-03	Fenpropimorf	mg/kg	0.15	p.0,15		-	1	Eurofins	SFBA0-7	3.51	54.695007	18.422677	54.693555	18.426393	54.691556	18.425256	54.693084	18.419877
Michał Korthals	8	19	19_44/2_w2	168/18/1575	19_44/2	2018-06-22	2018-07-03	Fenson	mg/kg	0.03	p.0,03		-	1	Eurofins	SFBA0-7	3.51	54.695007	18.422677	54.693555	18.426393	54.691556	18.425256	54.693084	18.419877
Michał Korthals	8	19	19_44/2_w2	168/18/1575	19_44/2	2018-06-22	2018-07-03	Fensulfotion	mg/kg	0.03	p.0,03		-	1	Eurofins	SFBA0-7	3.51	54.695007	18.422677	54.693555	18.426393	54.691556	18.425256	54.693084	18.419877
Michał Korthals	8	19	19_44/2_w2	168/18/1575	19_44/2	2018-06-22	2018-07-03	Fewalerat (suma izomer ów)	mg/kg	0.015	p.0,015		-	1	Eurofins	SFBA0-7	3.51	54.695007	18.422677	54.693555	18.426393	54.691556	18.425256	54.693084	18.419877
Michał Korthals	8	19	19_44/2_w2	168/18/1575	19_44/2	2018-06-22	2018-07-03	Fenwalerat	mg/kg	0.015	p.0,015		-	1	Eurofins	SFBA0-7	3.51	54.695007	18.422677	54.693555	18.426393	54.691556	18.425256	54.693084	18.419877
Michał Korthals	8	19	19_44/2_w2	168/18/1575	19_44/2	2018-06-22	2018-07-03	Fenvalerate(RS-/SR-Izomer)	mg/kg	0.015	p.0,015		-	1	Eurofins	SFBA0-7	3.51	54.695007	18.422677	54.693555	18.426393	54.691556	18.425256	54.693084	18.419877
Michał Korthals	8	19	19_44/2_w2	168/18/1575	19_44/2	2018-06-22	2018-07-03	Fipronil	mg/kg	0.012	p.0,012		-	1	Eurofins	SFBA0-7	3.51	54.695007	18.422677	54.693555	18.426393	54.691556	18.425256	54.693084	18.419877
Michał Korthals	8	19	19_44/2_w2	168/18/1575	19_44/2	2018-06-22	2018-07-03	Fipronil,desulfinyl-	mg/kg	0.012	p.0,012		-	1	Eurofins	SFBA0-7	3.51	54.695007	18.422677	54.693555	18.426393	54.691556	18.425256	54.693084	18.419877
Michał Korthals	8	19	19_44/2_w2	168/18/1575	19_44/2	2018-06-22	2018-07-03	Fipranil+Sulfonmetab.MB46136(suma)	mg/kg	0.015	p.0,015		-	1	Eurofins	SFBA0-7	3.51	54.695007	18.422677	54.693555	18.426393	54.691556	18.425256	54.693084	18.419877
Michał Korthals	8	19	19_44/2_w2	168/18/1575	19_44/2	2018-06-22	2018-07-03	Fipronil sulfid	mg/kg	0.015	p.0,015		-	1	Eurofins	SFBA0-7	3.51	54.695007	18.422677	54.693555	18.426393	54.691556	18.425256	54.693084	18.419877
Michał Korthals	8	19	19_44/2_w2	168/18/1575	19_44/2	2018-06-22	2018-07-03	Fipronil sulfon	mg/kg	0.015	p.0,015		-	1	Eurofins	SFBA0-7	3.51	54.695007	18.422677	54.693555	18.426393	54.691556	18.425256	54.693084	18.419877
Michał Korthals	8	19	19_44/2_w2	168/18/1575	19_44/2	2018-06-22	2018-07-03	Flamprop-isopropyl	mg/kg	0.03	p.0,03		-	1	Eurofins	SFBA0-7	3.51	54.695007	18.422677	54.693555	18.426393	54.691556	18.425256	54.693084	18.419877
Michał Korthals	8	19	19_44/2_w2	168/18/1575	19_44/2	2018-06-22	2018-07-03	Flamprop-methyl	mg/kg	0.03	p.0,03		-	1	Eurofins	SFBA0-7	3.51	54.695007	18.422677	54.693555	18.426393	54.691556	18.425256	54.693084	18.419877
Michał Korthals	8	19	19_44/2_w2	168/18/1575	19_44/2	2018-06-22	2018-07-03	Flonikamid	mg/kg	0.15	p.0,15		-	1	Eurofins	SFBA0-7	3.51	54.695007	18.422677	54.693555	18.426393	54.691556	18.425256	54.693084	18.419877
Michał Korthals	8	19	19_44/2_w2	168/18/1575	19_44/2	2018-06-22	2018-07-03	Fluazifop-butyl	mg/kg	0.15	p.0,15		-	1	Eurofins	SFBA0-7	3.51	54.695007	18.422677	54.693555	18.426393	54.691556	18.425256	54.693084	18.419877
Michał Korthals	8	19	19_44/2_w2	168/18/1575	19_44/2	2018-06-22	2018-07-03	Fluazinam	mg/kg	0.03	p.0,03		-	1	Eurofins	SFBA0-7	3.51	54.695007	18.422677	54.693555	18.426393	54.691556	18.425256	54.693084	18.419877
Michał Korthals	8	19	19_44/2_w2	168/18/1575	19_44/2	2018-06-22	2018-07-03	Fluchloralina	mg/kg	0.015	p.0,015		-	1	Eurofins	SFBA0-7	3.51	54.695007	18.422677	54.693555	18.426393	54.691556	18.425256	54.693084	18.419877
Michał Korthals	8	19	19_44/2_w2	168/18/1575	19_44/2	2018-06-22	2018-07-03	Flucytrynat	mg/kg	0.03	p.0,03		-	1	Eurofins	SFBA0-7	3.51	54.695007	18.422677	54.693555	18.426393	54.691556	18.425256	54.693084	18.419877
Michał Korthals	8	19	19_44/2_w2	168/18/1575	19_44/2	2018-06-22	2018-07-03	Flufenoksuron	mg/kg	0.03	p.0,03		-	1	Eurofins	SFBA0-7	3.51	54.695007	18.422677	54.693555	18.426393	54.691556	18.425256	54.693084	18.419877
Michał Korthals	8	19	19_44/2_w2	168/18/1575	19_44/2	2018-06-22	2018-07-03	Flumethrine	mg/kg	0.03	p.0,03		-	1	Eurofins	SFBA0-7	3.51	54.695007	18.422677	54.693555	18.426393	54.691556	18.425256	54.693084	18.419877
Michał Korthals	8	19	19_44/2_w2	168/18/1575	19_44/2	2018-06-22	2018-07-03	Flumetralin	mg/kg	0.015	p.0,015		-	1	Eurofins	SFBA0-7	3.51	54.695007	18.422677	54.693555	18.426393	54.691556	18.425256	54.693084	18.419877
Michał Korthals	8	19	19_44/2_w2	168/18/1575	19_44/2	2018-06-22	2018-07-03	Flupikolid	mg/kg	0.03	p.0,03		-	1	Eurofins	SFBA0-7	3.51	54.695007	18.422677	54.693555	18.426393	54.691556	18.425256	54.693084	18.419877
Michał Korthals	8	19	19_44/2_w2	168/18/1575	19_44/2	2018-06-22	2018-07-03	Fluorodifen	mg/kg	0.015	p.0,015		-	1	Eurofins	SFBA0-7	3.51	54.695007	18.422677	54.693555	18.426393	54.691556	18.425256	54.693084	18.419877
Michał Korthals	8	19	19_44/2_w2	168/18/1575	19_44/2	2018-06-22	2018-07-03	Fluotrimazole	mg/kg	0.1	p.0,1		-	1	Eurofins	SFBA0-7	3.51	54.695007	18.422677	54.693555	18.426393	54.691556	18.425256	54.693084	18.419877
Michał Korthals	8	19	19_44/2_w2	168/18/1575	19_44/2	2018-06-22	2018-07-03	Fluchinkonazol	mg/kg	0.03	p.0,03		-	1	Eurofins	SFBA0-7	3.51	54.695007	18.422677	54.693555	18.426393	54.691556	18.425256	54.693084	18.419877
Michał Korthals	8	19	19_44/2_w2	168/18/1575	19_44/2	2018-06-22	2018-07-03	Flurenol-butyl	mg/kg	0.06	p.0,06		-	1	Eurofins	SFBA0-7	3.51	54.695007	18.422677	54.693555	18.426393	54.691556	18.425256	54.693084	18.419877
Michał Korthals	8	19	19_44/2_w2	168/18/1575	19_44/2	2018-06-22	2018-07-03	Flurochloridon	mg/kg	0.03	p.0,03		-	1	Eurofins	SFBA0-7	3.51	54.695007	18.422677	54.693555	18.426393	54.691556	18.425256	54.693084	18.419877
Michał Korthals	8	19	19_44/2_w2	168/18/1575	19_44/2	2018-06-22	2018-07-03	Flurtamone	mg/kg	0.03	p.0,03		-	1	Eurofins	SFBA0-7	3.51	54.695007	18.422677	54.693555	18.426393	54.691556	18.425256	54.693084	18.419877
Michał Korthals	8	19	19_44/2_w2	168/18/1575	19_44/2	2018-06-22	2018-07-03	Flusilazol	mg/kg	0.075	p.0,075		-	1	Eurofins	SFBA0-7	3.51	54.695007	18.422677	54.693555	18.426393	54.691556	18.425256	54.693084	18.419877
Michał Korthals	8	19	19_44/2_w2	168/18/1575	19_44/2	2018-06-22	2018-07-03	Folpet	mg/kg	0.03	p.0,03		-	1	Eurofins	SFBA0-7	3.51	54.695007	18.422677	54.693555	18.426393	54.691556	18.425256	54.693084	18.419877
Michał Korthals	8	19	19_44/2_w2	168/18/1575	19_44/2	2018-06-22	2018-07-03	Fonofos	mg/kg	0.015	p.0,015		-	1	Eurofins	SFBA0-7	3.51	54.695007	18.422677	54.693555	18.426393	54.691556	18.425256	54.693084	18.419877
Michał Korthals	8	19	19_44/2_w2	168/18/1575	19_44/2	2018-06-22	2018-07-03	Formotion	mg/kg	0.03	p.0,03		-	1	Eurofins	SFBA0-7	3.51	54.695007	18.422677	54.693555	18.426393	54.691556	18.425256	54.693084	18.419877
Michał Korthals	8	19	19_44/2_w2	168/18/1575	19_44/2	2018-06-22	2018-07-03	Genite	mg/kg	0.03	p.0,03		-	1	Eurofins	SFBA0-7	3.51	54.695007	18.422677	54.693555	18.426393	54.691556	18.425256	54.693084	18.419877
Michał Korthals	8	19	19_44/2_w2	168/18/1575	19_44/2	2018-06-22	2018-07-03	Halfenprox	mg/kg	0.03	p.0,03		-	1	Eurofins	SFBA0-7	3.51	54.695007	18.422677	54.693555	18.426393	54.691556	18.425256	54.693084	18.419877
Michał Korthals	8	19	19_44/2_w2	168/18/1575	19_44/2	2018-06-22	2018-07-03	Haloxyfop-Ethoxyethyl	mg/kg	0.03	p.0,03		-	1	Eurofins	SFBA0-7	3.51	54.695007	18.422677	54.693555	18.426393	54.691556	18.425256	54.693084	18.419877
Michał Korthals	8	19	19_44/2_w2	168/18/1575	19_44/2	2018-06-22	2018-07-03	Haloxyfop-methyl	mg/kg	0.15	p.0,15		-	1	Eurofins	SFBA0-7	3.51	54.695007	18.422677	54.693555	18.426393	54.691556	18.425256	54.693084	18.419877
Michał Korthals	8	19	19_44/2_w2	168/18/1575	19_44/2	2018-06-22	2018-07-03	HCH (sumaizomerów-bez lindan)	mg/kg	0.015	p.0,015		-	1	Eurofins	SFBA0-7	3.51	54.695007	18.422677	54.693555	18.426393	54.691556	18.425256	54.693084	18.419877
Michał Korthals	8	19	19_44/2_w2	168/18/1575	19_44/2	2018-06-22	2018-07-03	Alfa-HCH	mg/kg	0.015	p.0,015		-	1	Eurofins	SFBA0-7	3.51	54.695007	18.422677	54.693555	18.426393	54.691556	18.425256	54.693084	18.419877
Michał Korthals	8	19	19_44/2_w2	168/18/1575	19_44/2	2018-06-22	2018-07-03	Beta-HCH	mg/kg	0.015	p.0,015		-	1	Eurofins	SFBA0-7	3.51	54.695007	18.422677	54.693555	18.426393	54.691556	18.425256	54.693084	18.419877
Michał Korthals	8	19	19_44/2_w2	168/18/1575	19_44/2	2018-06-22	2018-07-03	Delta-HCH	mg/kg	0.015	p.0,015		-	1	Eurofins	SFBA0-7	3.51	54.695007	18.422677	54.693555	18.426393	54.691556	18.425256	54.693084	18.419877
Michał Korthals	8	19	19_44/2_w2	168/18/1575	19_44/2	2018-06-22	2018-07-03	Epsilon-HCH	mg/kg	0.015	p.0,015		-	1	Eurofins	SFBA0-7	3.51	54.695007	18.422677	54.693555	18.426393	54.691556	18.425256	54.693084	18.419877
Michał Korthals	8	19	19_44/2_w2	168/18/1575	19_44/2	2018-06-22	2018-07-03	Lindan(gamma-HCH)	mg/kg	0.015	p.0,015		-	1	Eurofins	SFBA0-7	3.51	54.695007	18.422677	54.693555	18.426393	54.691556	18.425256	54.693084	18.419877
Michał Korthals	8	19	19_44/2_w2	168/18/1575	19_44/2	2018-06-22	2018-07-03	Heptachlor	mg/kg	0.015	p.0,015		-	1	Eurofins	SFBA0-7	3.51	54.695007	18.422677	54.693555	18.426393	54.691556	18.425256	54.693084	18.419877
Michał Korthals	8	19	19_44/2_w2	168/18/1575	19_44/2	2018-06-22	2018-07-03	Heptachlor(suma)	mg/kg	0.015	p.0,015		-	1	Eurofins	SFBA0-7	3.51	54.695007	18.422677	54.693555	18.426393	54.691556	18.425256	54.693084	18.419877
Michał Korthals	8	19	19_44/2_w2	168/18/1575	19_44/2	2018-06-22	2018-07-03	Heptahlor-trans-epoksyd	mg/kg	0.015	p.0,015		-	1	Eurofins	SFBA0-7	3.51	54.695007	18.422677	54.693555	18.426393	54.691556	18.425256	54.693084	18.419877
Michał Korthals	8	19	19_44/2_w2	168/18/1575	19_44/2	2018-06-22	2018-07-03	Heptahlor-cis-epoksyd	mg/kg	0.015	p.0,015		-	1	Eurofins	SFBA0-7	3.51	54.695007	18.422677	54.693555	18.426393	54.691556	18.425256	54.693084	18.419877
Michał Korthals	8	19	19_44/2_w2	168/18/1575	19_44/2	2018-06-22	2018-07-03	Heptenofos	mg/kg	0.03	p.0,03		-	1	Eurofins	SFBA0-7	3.51	54.695007	18.422677	54.693555	18.426393	54.691556	18.425256	54.693084	18.419877
Michał Korthals	8	19	19_44/2_w2	168/18/1575	19_44/2	2018-06-22	2018-07-03	Heksachlorobenzen(HCB)	mg/kg	0.015	p.0,015		-	1	Eurofins	SFBA0-7	3.51	54.695007	18.422677	54.693555	18.426393	54.691556	18.425256	54.693084	18.419877
Michał Korthals	8	19	19_44/2_w2	168/18/1575	19_44/2	2018-06-22	2018-07-03	Heksakonazol	mg/kg	0.045	p.0,045		-	1	Eurofins	SFBA0-7	3.51	54.695007	18.422677	54.693555	18.426393	54.691556	18.425256	54.693084	18.419877
Michał Korthals	8	19	19_44/2_w2	168/18/1575	19_44/2	2018-06-22	2018-07-03	Indanofan	mg/kg	0.06	p.0,06		-	1	Eurofins	SFBA0-7	3.51	54.695007	18.422677	54.693555	18.426393	54.691556	18.425256	54.693084	18.419877
Michał Korthals	8	19	19_44/2_w2	168/18/1575	19_44/2	2018-06-22	2018-07-03	Indoksakarb	mg/kg	0.015	p.0,015		-	1	Eurofins	SFBA0-7	3.51	54.695007	18.422677	54.693555	18.426393	54.691556	18.425256	54.693084	18.419877
Michał Korthals	8	19	19_44/2_w2	168/18/1575	19_44/2	2018-06-22	2018-07-03	Jodofenfos	mg/kg	0.015	p.0,015		-	1	Eurofins	SFBA0-7	3.51	54.695007	18.422677	54.693555	18.426393	54.691556	18.425256	54.693084	18.419877
Michał Korthals	8	19	19_44/2_w2	168/18/1575	19_44/2	2018-06-22	2018-07-03	Ioxynil-Octanoate	mg/kg	0.03	p.0,03		-	1	Eurofins	SFBA0-7	3.51	54.695007	18.422677	54.693555	18.426393	54.691556	18.425256	54.693084	18.419877
Michał Korthals	8	19	19_44/2_w2	168/18/1575	19_44/2	2018-06-22	2018-07-03	Iprobenfos	mg/kg	0.03	p.0,03		-	1	Eurofins	SFBA0-7	3.51	54.695007	18.422677	54.693555	18.426393	54.691556	18.425256	54.693084	18.419877
Michał Korthals	8	19	19_44/2_w2	168/18/1575	19_44/2	2018-06-22	2018-07-03	Iprodion	mg/kg	0.03	p.0,03		-	1	Eurofins	SFBA0-7	3.51	54.695007	18.422677	54.693555	18.426393	54.691556	18.425256	54.693084	18.419877
Michał Korthals	8	19	19_44/2_w2	168/18/1575	19_44/2	2018-06-22	2018-07-03	Isazophos	mg/kg	0.03	p.0,03		-	1	Eurofins	SFBA0-7	3.51	54.695007	18.422677	54.693555	18.426393	54.691556	18.425256	54.693084	18.419877
Michał Korthals	8	19	19_44/2_w2	168/18/1575	19_44/2	2018-06-22	2018-07-03	Isobenzan	mg/kg	0.015	p.0,015		-	1	Eurofins	SFBA0-7	3.51	54.695007	18.422677	54.693555	18.426393	54.691556	18.425256	54.693084	18.419877
Michał Korthals	8	19	19_44/2_w2	168/18/1575	19_44/2	2018-06-22	2018-07-03	Isocarbofos	mg/kg	0.03	p.0,03		-	1	Eurofins	SFBA0-7	3.51	54.695007	18.422677	54.693555	18.426393	54.691556	18.425256	54.693084	18.419877
Michał Korthals	8	19	19_44/2_w2	168/18/1575	19_44/2	2018-06-22	2018-07-03	Izodryna	mg/kg	0.015	p.0,015		-	1	Eurofins	SFBA0-7	3.51	54.695007	18.422677	54.693555	18.426393	54.691556	18.425256	54.693084	18.419877
Michał Korthals	8	19	19_44/2_w2	168/18/1575	19_44/2	2018-06-22	2018-07-03	Izofenfos	mg/kg	0.015	p.0,015		-	1	Eurofins	SFBA0-7	3.51	54.695007	18.422677	54.693555	18.426393	54.691556	18.425256	54.693084	18.419877
Michał Korthals	8	19	19_44/2_w2	168/18/1575	19_44/2	2018-06-22	2018-07-03	Isofenphos-Methyl	mg/kg	0.015	p.0,015		-	1	Eurofins	SFBA0-7	3.51	54.695007	18.422677	54.693555	18.426393	54.691556	18.425256	54.693084	18.419877
Michał Korthals	8	19	19_44/2_w2	168/18/1575	19_44/2	2018-06-22	2018-07-03	Isomethiozin	mg/kg	0.03	p.0,03		-	1	Eurofins	SFBA0-7	3.51	54.695007	18.422677	54.693555	18.426393	54.691556	18.425256	54.693084	18.419877
Michał Korthals	8	19	19_44/2_w2	168/18/1575	19_44/2	2018-06-22	2018-07-03	Isopropalin	mg/kg	0.015	p.0,015		-	1	Eurofins	SFBA0-7	3.51	54.695007	18.422677	54.693555	18.426393	54.691556	18.425256	54.693084	18.419877
Michał Korthals	8	19	19_44/2_w2	168/18/1575	19_44/2	2018-06-22	2018-07-03	Isoxadifen-ethyl	mg/kg	0.03	p.0,03		-	1	Eurofins	SFBA0-7	3.51	54.695007	18.422677	54.693555	18.426393	54.691556	18.425256	54.693084	18.419877
Michał Korthals	8	19	19_44/2_w2	168/18/1575	19_44/2	2018-06-22	2018-07-03	Krezoksym-metylu	mg/kg	0.015	p.0,015		-	1	Eurofins	SFBA0-7	3.51	54.695007	18.422677	54.693555	18.426393	54.691556	18.425256	54.693084	18.419877
Michał Korthals	8	19	19_44/2_w2	168/18/1575	19_44/2	2018-06-22	2018-07-03	Lactofen	mg/kg	0.03	p.0,03		-	1	Eurofins	SFBA0-7	3.51	54.695007	18.422677	54.693555	18.426393	54.691556	18.425256	54.693084	18.419877
Michał Korthals	8	19	19_44/2_w2	168/18/1575	19_44/2	2018-06-22	2018-07-03	Leptophos	mg/kg	0.03	p.0,03		-	1	Eurofins	SFBA0-7	3.51	54.695007	18.422677	54.693555	18.426393	54.691556	18.425256	54.693084	18.419877
Michał Korthals	8	19	19_44/2_w2	168/18/1575	19_44/2	2018-06-22	2018-07-03	Lufenuron	mg/kg	0.036	p.0,03600		-	1	Eurofins	SFBA0-7	3.51	54.695007	18.422677	54.693555	18.426393	54.691556	18.425256	54.693084	18.419877
Michał Korthals	8	19	19_44/2_w2	168/18/1575	19_44/2	2018-06-22	2018-07-03	Malaokson	mg/kg	0.015	p.0,015		-	1	Eurofins	SFBA0-7	3.51	54.695007	18.422677	54.693555	18.426393	54.691556	18.425256	54.693084	18.419877
Michał Korthals	8	19	19_44/2_w2	168/18/1575	19_44/2	2018-06-22	2018-07-03	Malation	mg/kg	0.03	p.0,03		-	1	Eurofins	SFBA0-7	3.51	54.695007	18.422677	54.693555	18.426393	54.691556	18.425256	54.693084	18.419877
Michał Korthals	8	19	19_44/2_w2	168/18/1575	19_44/2	2018-06-22	2018-07-03	Mekarbam	mg/kg	0.03	p.0,03		-	1	Eurofins	SFBA0-7	3.51	54.695007	18.422677	54.693555	18.426393	54.691556	18.425256	54.693084	18.419877
Michał Korthals	8	19	19_44/2_w2	168/18/1575	19_44/2	2018-06-22	2018-07-03	Mephosfolan	mg/kg	0.03	p.0,03		-	1	Eurofins	SFBA0-7	3.51	54.695007	18.422677	54.693555	18.426393	54.691556	18.425256	54.693084	18.419877
Michał Korthals	8	19	19_44/2_w2	168/18/1575	19_44/2	2018-06-22	2018-07-03	Merphos	mg/kg	0.03	p.0,03		-	1	Eurofins	SFBA0-7	3.51	54.695007	18.422677	54.693555	18.426393	54.691556	18.425256	54.693084	18.419877
Michał Korthals	8	19	19_44/2_w2	168/18/1575	19_44/2	2018-06-22	2018-07-03	Metazachlor	mg/kg	0.03	p.0,03		-	1	Eurofins	SFBA0-7	3.51	54.695007	18.422677	54.693555	18.426393	54.691556	18.425256	54.693084	18.419877
Michał Korthals	8	19	19_44/2_w2	168/18/1575	19_44/2	2018-06-22	2018-07-03	Metakrifos	mg/kg	0.15	p.0,15		-	1	Eurofins	SFBA0-7	3.51	54.695007	18.422677	54.693555	18.426393	54.691556	18.425256	54.693084	18.419877
Michał Korthals	8	19	19_44/2_w2	168/18/1575	19_44/2	2018-06-22	2018-07-03	Metydation	mg/kg	0.036	p.0,03600		-	1	Eurofins	SFBA0-7	3.51	54.695007	18.422677	54.693555	18.426393	54.691556	18.425256	54.693084	18.419877
Michał Korthals	8	19	19_44/2_w2	168/18/1575	19_44/2	2018-06-22	2018-07-03	Metoksychlor	mg/kg	0.015	p.0,015		-	1	Eurofins	SFBA0-7	3.51	54.695007	18.422677	54.693555	18.426393	54.691556	18.425256	54.693084	18.419877
Michał Korthals	8	19	19_44/2_w2	168/18/1575	19_44/2	2018-06-22	2018-07-03	Metolachlor	mg/kg	0.15	p.0,15		-	1	Eurofins	SFBA0-7	3.51	54.695007	18.422677	54.693555	18.426393	54.691556	18.425256	54.693084	18.419877
Michał Korthals	8	19	19_44/2_w2	168/18/1575	19_44/2	2018-06-22	2018-07-03	Metrafenon	mg/kg	0.15	p.0,15		-	1	Eurofins	SFBA0-7	3.51	54.695007	18.422677	54.693555	18.426393	54.691556	18.425256	54.693084	18.419877
Michał Korthals	8	19	19_44/2_w2	168/18/1575	19_44/2	2018-06-22	2018-07-03	Metribuzyn	mg/kg	0.03	p.0,03		-	1	Eurofins	SFBA0-7	3.51	54.695007	18.422677	54.693555	18.426393	54.691556	18.425256	54.693084	18.419877
Michał Korthals	8	19	19_44/2_w2	168/18/1575	19_44/2	2018-06-22	2018-07-03	Mevinfos	mg/kg	0.03	p.0,03		-	1	Eurofins	SFBA0-7	3.51	54.695007	18.422677	54.693555	18.426393	54.691556	18.425256	54.693084	18.419877
Michał Korthals	8	19	19_44/2_w2	168/18/1575	19_44/2	2018-06-22	2018-07-03	Mirex	mg/kg	0.015	p.0,015		-	1	Eurofins	SFBA0-7	3.51	54.695007	18.422677	54.693555	18.426393	54.691556	18.425256	54.693084	18.419877
Michał Korthals	8	19	19_44/2_w2	168/18/1575	19_44/2	2018-06-22	2018-07-03	Molinate	mg/kg	0.045	p.0,045		-	1	Eurofins	SFBA0-7	3.51	54.695007	18.422677	54.693555	18.426393	54.691556	18.425256	54.693084	18.419877
Michał Korthals	8	19	19_44/2_w2	168/18/1575	19_44/2	2018-06-22	2018-07-03	Myklobutanil	mg/kg	0.015	p.0,015		-	1	Eurofins	SFBA0-7	3.51	54.695007	18.422677	54.693555	18.426393	54.691556	18.425256	54.693084	18.419877
Michał Korthals	8	19	19_44/2_w2	168/18/1575	19_44/2	2018-06-22	2018-07-03	Nitralin	mg/kg	0.03	p.0,03		-	1	Eurofins	SFBA0-7	3.51	54.695007	18.422677	54.693555	18.426393	54.691556	18.425256	54.693084	18.419877
Michał Korthals	8	19	19_44/2_w2	168/18/1575	19_44/2	2018-06-22	2018-07-03	Nitrapyrin	mg/kg	0.06	p.0,06		-	1	Eurofins	SFBA0-7	3.51	54.695007	18.422677	54.693555	18.426393	54.691556	18.425256	54.693084	18.419877
Michał Korthals	8	19	19_44/2_w2	168/18/1575	19_44/2	2018-06-22	2018-07-03	Nitrofen	mg/kg	0.03	p.0,03		-	1	Eurofins	SFBA0-7	3.51	54.695007	18.422677	54.693555	18.426393	54.691556	18.425256	54.693084	18.419877
Michał Korthals	8	19	19_44/2_w2	168/18/1575	19_44/2	2018-06-22	2018-07-03	Nitrothal-isopropyl	mg/kg	0.03	p.0,03		-	1	Eurofins	SFBA0-7	3.51	54.695007	18.422677	54.693555	18.426393	54.691556	18.425256	54.693084	18.419877
Michał Korthals	8	19	19_44/2_w2	168/18/1575	19_44/2	2018-06-22	2018-07-03	Norflurazon	mg/kg	0.15	p.0,15		-	1	Eurofins	SFBA0-7	3.51	54.695007	18.422677	54.693555	18.426393	54.691556	18.425256	54.693084	18.419877
Michał Korthals	8	19	19_44/2_w2	168/18/1575	19_44/2	2018-06-22	2018-07-03	Nuarimol	mg/kg	0.03	p.0,03		-	1	Eurofins	SFBA0-7	3.51	54.695007	18.422677	54.693555	18.426393	54.691556	18.425256	54.693084	18.419877
Michał Korthals	8	19	19_44/2_w2	168/18/1575	19_44/2	2018-06-22	2018-07-03	Ometoat	mg/kg	0.3	p.0,3		-	1	Eurofins	SFBA0-7	3.51	54.695007	18.422677	54.693555	18.426393	54.691556	18.425256	54.693084	18.419877
Michał Korthals	8	19	19_44/2_w2	168/18/1575	19_44/2	2018-06-22	2018-07-03	Oxadiazon	mg/kg	0.015	p.0,015		-	1	Eurofins	SFBA0-7	3.51	54.695007	18.422677	54.693555	18.426393	54.691556	18.425256	54.693084	18.419877
Michał Korthals	8	19	19_44/2_w2	168/18/1575	19_44/2	2018-06-22	2018-07-03	Oxydemeton-methyl	mg/kg	0.03	p.0,03		-	1	Eurofins	SFBA0-7	3.51	54.695007	18.422677	54.693555	18.426393	54.691556	18.425256	54.693084	18.419877
Michał Korthals	8	19	19_44/2_w2	168/18/1575	19_44/2	2018-06-22	2018-07-03	Oksyfluoroten	mg/kg	0.03	p.0,03		-	1	Eurofins	SFBA0-7	3.51	54.695007	18.422677	54.693555	18.426393	54.691556	18.425256	54.693084	18.419877
Michał Korthals	8	19	19_44/2_w2	168/18/1575	19_44/2	2018-06-22	2018-07-03	Paklobutrazol	mg/kg	0.12	p.0,12		-	1	Eurofins	SFBA0-7	3.51	54.695007	18.422677	54.693555	18.426393	54.691556	18.425256	54.693084	18.419877
Michał Korthals	8	19	19_44/2_w2	168/18/1575	19_44/2	2018-06-22	2018-07-03	Paraoxon-ethyl	mg/kg	0.045	p.0,045		-	1	Eurofins	SFBA0-7	3.51	54.695007	18.422677	54.693555	18.426393	54.691556	18.425256	54.693084	18.419877
Michał Korthals	8	19	19_44/2_w2	168/18/1575	19_44/2	2018-06-22	2018-07-03	Paraokson metylowy	mg/kg	0.045	p.0,045		-	1	Eurofins	SFBA0-7	3.51	54.695007	18.422677	54.693555	18.426393	54.691556	18.425256	54.693084	18.419877
Michał Korthals	8	19	19_44/2_w2	168/18/1575	19_44/2	2018-06-22	2018-07-03	Paration	mg/kg	0.015	p.0,015		-	1	Eurofins	SFBA0-7	3.51	54.695007	18.422677	54.693555	18.426393	54.691556	18.425256	54.693084	18.419877
Michał Korthals	8	19	19_44/2_w2	168/18/1575	19_44/2	2018-06-22	2018-07-03	Paration metylu	mg/kg	0.015	p.0,015		-	1	Eurofins	SFBA0-7	3.51	54.695007	18.422677	54.693555	18.426393	54.691556	18.425256	54.693084	18.419877
Michał Korthals	8	19	19_44/2_w2	168/18/1575	19_44/2	2018-06-22	2018-07-03	Paration metylu/Paraokson metylu (suma)	mg/kg	0.015	p.0,015		-	1	Eurofins	SFBA0-7	3.51	54.695007	18.422677	54.693555	18.426393	54.691556	18.425256	54.693084	18.419877
Michał Korthals	8	19	19_44/2_w2	168/18/1575	19_44/2	2018-06-22	2018-07-03	PCB IUPAC 101	mg/kg	0.015	p.0,015		-	1	Eurofins	SFBA0-7	3.51	54.695007	18.422677	54.693555	18.426393	54.691556	18.425256	54.693084	18.419877
Michał Korthals	8	19	19_44/2_w2	168/18/1575	19_44/2	2018-06-22	2018-07-03	PCB 118	mg/kg	0.015	p.0,015		-	1	Eurofins	SFBA0-7	3.51	54.695007	18.422677	54.693555	18.426393	54.691556	18.425256	54.693084	18.419877
Michał Korthals	8	19	19_44/2_w2	168/18/1575	19_44/2	2018-06-22	2018-07-03	PCB 138	mg/kg	0.015	p.0,015		-	1	Eurofins	SFBA0-7	3.51	54.695007	18.422677	54.693555	18.426393	54.691556	18.425256	54.693084	18.419877
Michał Korthals	8	19	19_44/2_w2	168/18/1575	19_44/2	2018-06-22	2018-07-03	PCB 153	mg/kg	0.015	p.0,015		-	1	Eurofins	SFBA0-7	3.51	54.695007	18.422677	54.693555	18.426393	54.691556	18.425256	54.693084	18.419877
Michał Korthals	8	19	19_44/2_w2	168/18/1575	19_44/2	2018-06-22	2018-07-03	PCB 180	mg/kg	0.015	p.0,015		-	1	Eurofins	SFBA0-7	3.51	54.695007	18.422677	54.693555	18.426393	54.691556	18.425256	54.693084	18.419877
Michał Korthals	8	19	19_44/2_w2	168/18/1575	19_44/2	2018-06-22	2018-07-03	PCB 28	mg/kg	0.015	p.0,015		-	1	Eurofins	SFBA0-7	3.51	54.695007	18.422677	54.693555	18.426393	54.691556	18.425256	54.693084	18.419877
Michał Korthals	8	19	19_44/2_w2	168/18/1575	19_44/2	2018-06-22	2018-07-03	PCB 52	mg/kg	0.015	p.0,015		-	1	Eurofins	SFBA0-7	3.51	54.695007	18.422677	54.693555	18.426393	54.691556	18.425256	54.693084	18.419877
Michał Korthals	8	19	19_44/2_w2	168/18/1575	19_44/2	2018-06-22	2018-07-03	Penkonazol	mg/kg	0.03	p.0,03		-	1	Eurofins	SFBA0-7	3.51	54.695007	18.422677	54.693555	18.426393	54.691556	18.425256	54.693084	18.419877
Michał Korthals	8	19	19_44/2_w2	168/18/1575	19_44/2	2018-06-22	2018-07-03	Pendimetalina	mg/kg	0.015	p.0,015		-	1	Eurofins	SFBA0-7	3.51	54.695007	18.422677	54.693555	18.426393	54.691556	18.425256	54.693084	18.419877
Michał Korthals	8	19	19_44/2_w2	168/18/1575	19_44/2	2018-06-22	2018-07-03	Pentachloranisol	mg/kg	0.015	p.0,015		-	1	Eurofins	SFBA0-7	3.51	54.695007	18.422677	54.693555	18.426393	54.691556	18.425256	54.693084	18.419877
Michał Korthals	8	19	19_44/2_w2	168/18/1575	19_44/2	2018-06-22	2018-07-03	Pentachloraniline	mg/kg	0.03	p.0,03		-	1	Eurofins	SFBA0-7	3.51	54.695007	18.422677	54.693555	18.426393	54.691556	18.425256	54.693084	18.419877
Michał Korthals	8	19	19_44/2_w2	168/18/1575	19_44/2	2018-06-22	2018-07-03	Pentachlorobenzen	mg/kg	0.015	p.0,015		-	1	Eurofins	SFBA0-7	3.51	54.695007	18.422677	54.693555	18.426393	54.691556	18.425256	54.693084	18.419877
Michał Korthals	8	19	19_44/2_w2	168/18/1575	19_44/2	2018-06-22	2018-07-03	Pentachlorothioanisole	mg/kg	0.03	p.0,03		-	1	Eurofins	SFBA0-7	3.51	54.695007	18.422677	54.693555	18.426393	54.691556	18.425256	54.693084	18.419877
Michał Korthals	8	19	19_44/2_w2	168/18/1575	19_44/2	2018-06-22	2018-07-03	Permetryna	mg/kg	0.06	p.0,06		-	1	Eurofins	SFBA0-7	3.51	54.695007	18.422677	54.693555	18.426393	54.691556	18.425256	54.693084	18.419877
Michał Korthals	8	19	19_44/2_w2	168/18/1575	19_44/2	2018-06-22	2018-07-03	Pertan	mg/kg	0.6	p.0,6		-	1	Eurofins	SFBA0-7	3.51	54.695007	18.422677	54.693555	18.426393	54.691556	18.425256	54.693084	18.419877
Michał Korthals	8	19	19_44/2_w2	168/18/1575	19_44/2	2018-06-22	2018-07-03	Phenkapton	mg/kg	0.03	p.0,03		-	1	Eurofins	SFBA0-7	3.51	54.695007	18.422677	54.693555	18.426393	54.691556	18.425256	54.693084	18.419877
Michał Korthals	8	19	19_44/2_w2	168/18/1575	19_44/2	2018-06-22	2018-07-03	Phenothrin	mg/kg	0.03	p.0,03		-	1	Eurofins	SFBA0-7	3.51	54.695007	18.422677	54.693555	18.426393	54.691556	18.425256	54.693084	18.419877
Michał Korthals	8	19	19_44/2_w2	168/18/1575	19_44/2	2018-06-22	2018-07-03	Fentoat	mg/kg	0.03	p.0,03		-	1	Eurofins	SFBA0-7	3.51	54.695007	18.422677	54.693555	18.426393	54.691556	18.425256	54.693084	18.419877
Michał Korthals	8	19	19_44/2_w2	168/18/1575	19_44/2	2018-06-22	2018-07-03	Fosalon	mg/kg	0.03	p.0,03		-	1	Eurofins	SFBA0-7	3.51	54.695007	18.422677	54.693555	18.426393	54.691556	18.425256	54.693084	18.419877
Michał Korthals	8	19	19_44/2_w2	168/18/1575	19_44/2	2018-06-22	2018-07-03	Phosfolane	mg/kg	0.03	p.0,03		-	1	Eurofins	SFBA0-7	3.51	54.695007	18.422677	54.693555	18.426393	54.691556	18.425256	54.693084	18.419877
Michał Korthals	8	19	19_44/2_w2	168/18/1575	19_44/2	2018-06-22	2018-07-03	Fosmet	mg/kg	0.03	p.0,03		-	1	Eurofins	SFBA0-7	3.51	54.695007	18.422677	54.693555	18.426393	54.691556	18.425256	54.693084	18.419877
Michał Korthals	8	19	19_44/2_w2	168/18/1575	19_44/2	2018-06-22	2018-07-03	Picolinafen	mg/kg	0.03	p.0,03		-	1	Eurofins	SFBA0-7	3.51	54.695007	18.422677	54.693555	18.426393	54.691556	18.425256	54.693084	18.419877
Michał Korthals	8	19	19_44/2_w2	168/18/1575	19_44/2	2018-06-22	2018-07-03	Pikoksystrobina	mg/kg	0.06	p.0,06		-	1	Eurofins	SFBA0-7	3.51	54.695007	18.422677	54.693555	18.426393	54.691556	18.425256	54.693084	18.419877
Michał Korthals	8	19	19_44/2_w2	168/18/1575	19_44/2	2018-06-22	2018-07-03	Piperophos	mg/kg	0.03	p.0,03		-	1	Eurofins	SFBA0-7	3.51	54.695007	18.422677	54.693555	18.426393	54.691556	18.425256	54.693084	18.419877
Michał Korthals	8	19	19_44/2_w2	168/18/1575	19_44/2	2018-06-22	2018-07-03	Pirymifos metylowy	mg/kg	0.03	p.0,03		-	1	Eurofins	SFBA0-7	3.51	54.695007	18.422677	54.693555	18.426393	54.691556	18.425256	54.693084	18.419877
Michał Korthals	8	19	19_44/2_w2	168/18/1575	19_44/2	2018-06-22	2018-07-03	Pirymifos etylu	mg/kg	0.03	p.0,03		-	1	Eurofins	SFBA0-7	3.51	54.695007	18.422677	54.693555	18.426393	54.691556	18.425256	54.693084	18.419877
Michał Korthals	8	19	19_44/2_w2	168/18/1575	19_44/2	2018-06-22	2018-07-03	Plifenate	mg/kg	0.03	p.0,03		-	1	Eurofins	SFBA0-7	3.51	54.695007	18.422677	54.693555	18.426393	54.691556	18.425256	54.693084	18.419877
Michał Korthals	8	19	19_44/2_w2	168/18/1575	19_44/2	2018-06-22	2018-07-03	Praletryna	mg/kg	0.03	p.0,03		-	1	Eurofins	SFBA0-7	3.51	54.695007	18.422677	54.693555	18.426393	54.691556	18.425256	54.693084	18.419877
Michał Korthals	8	19	19_44/2_w2	168/18/1575	19_44/2	2018-06-22	2018-07-03	Procymidon	mg/kg	0.045	p.0,045		-	1	Eurofins	SFBA0-7	3.51	54.695007	18.422677	54.693555	18.426393	54.691556	18.425256	54.693084	18.419877
Michał Korthals	8	19	19_44/2_w2	168/18/1575	19_44/2	2018-06-22	2018-07-03	Profenfos	mg/kg	0.015	p.0,015		-	1	Eurofins	SFBA0-7	3.51	54.695007	18.422677	54.693555	18.426393	54.691556	18.425256	54.693084	18.419877
Michał Korthals	8	19	19_44/2_w2	168/18/1575	19_44/2	2018-06-22	2018-07-03	Profluralina	mg/kg	0.015	p.0,015		-	1	Eurofins	SFBA0-7	3.51	54.695007	18.422677	54.693555	18.426393	54.691556	18.425256	54.693084	18.419877
Michał Korthals	8	19	19_44/2_w2	168/18/1575	19_44/2	2018-06-22	2018-07-03	Propachlor	mg/kg	0.03	p.0,03		-	1	Eurofins	SFBA0-7	3.51	54.695007	18.422677	54.693555	18.426393	54.691556	18.425256	54.693084	18.419877
Michał Korthals	8	19	19_44/2_w2	168/18/1575	19_44/2	2018-06-22	2018-07-03	Propanil	mg/kg	0.03	p.0,03		-	1	Eurofins	SFBA0-7	3.51	54.695007	18.422677	54.693555	18.426393	54.691556	18.425256	54.693084	18.419877
Michał Korthals	8	19	19_44/2_w2	168/18/1575	19_44/2	2018-06-22	2018-07-03	Propazyna	mg/kg	0.15	p.0,15		-	1	Eurofins	SFBA0-7	3.51	54.695007	18.422677	54.693555	18.426393	54.691556	18.425256	54.693084	18.419877
Michał Korthals	8	19	19_44/2_w2	168/18/1575	19_44/2	2018-06-22	2018-07-03	Propetamfos	mg/kg	0.015	p.0,015		-	1	Eurofins	SFBA0-7	3.51	54.695007	18.422677	54.693555	18.426393	54.691556	18.425256	54.693084	18.419877
Michał Korthals	8	19	19_44/2_w2	168/18/1575	19_44/2	2018-06-22	2018-07-03	Propikonazol	mg/kg	0.03	p.0,03		-	1	Eurofins	SFBA0-7	3.51	54.695007	18.422677	54.693555	18.426393	54.691556	18.425256	54.693084	18.419877
Michał Korthals	8	19	19_44/2_w2	168/18/1575	19_44/2	2018-06-22	2018-07-03	Propyzamid	mg/kg	0.03	p.0,03		-	1	Eurofins	SFBA0-7	3.51	54.695007	18.422677	54.693555	18.426393	54.691556	18.425256	54.693084	18.419877
Michał Korthals	8	19	19_44/2_w2	168/18/1575	19_44/2	2018-06-22	2018-07-03	Protiofos	mg/kg	0.015	p.0,015		-	1	Eurofins	SFBA0-7	3.51	54.695007	18.422677	54.693555	18.426393	54.691556	18.425256	54.693084	18.419877
Michał Korthals	8	19	19_44/2_w2	168/18/1575	19_44/2	2018-06-22	2018-07-03	Prothoat	mg/kg	0.03	p.0,03		-	1	Eurofins	SFBA0-7	3.51	54.695007	18.422677	54.693555	18.426393	54.691556	18.425256	54.693084	18.419877
Michał Korthals	8	19	19_44/2_w2	168/18/1575	19_44/2	2018-06-22	2018-07-03	Pyraclofos	mg/kg	0.03	p.0,03		-	1	Eurofins	SFBA0-7	3.51	54.695007	18.422677	54.693555	18.426393	54.691556	18.425256	54.693084	18.419877
Michał Korthals	8	19	19_44/2_w2	168/18/1575	19_44/2	2018-06-22	2018-07-03	Pyraflufen-ethyl	mg/kg	0.06	p.0,06		-	1	Eurofins	SFBA0-7	3.51	54.695007	18.422677	54.693555	18.426393	54.691556	18.425256	54.693084	18.419877
Michał Korthals	8	19	19_44/2_w2	168/18/1575	19_44/2	2018-06-22	2018-07-03	Pirazofos	mg/kg	0.03	p.0,03		-	1	Eurofins	SFBA0-7	3.51	54.695007	18.422677	54.693555	18.426393	54.691556	18.425256	54.693084	18.419877
Michał Korthals	8	19	19_44/2_w2	168/18/1575	19_44/2	2018-06-22	2018-07-03	Pyretryny	mg/kg	0.06	p.0,06		-	1	Eurofins	SFBA0-7	3.51	54.695007	18.422677	54.693555	18.426393	54.691556	18.425256	54.693084	18.419877
Michał Korthals	8	19	19_44/2_w2	168/18/1575	19_44/2	2018-06-22	2018-07-03	Pirydaben	mg/kg	0.015	p.0,015		-	1	Eurofins	SFBA0-7	3.51	54.695007	18.422677	54.693555	18.426393	54.691556	18.425256	54.693084	18.419877
Michał Korthals	8	19	19_44/2_w2	168/18/1575	19_44/2	2018-06-22	2018-07-03	Pyridaphenthion	mg/kg	0.03	p.0,03		-	1	Eurofins	SFBA0-7	3.51	54.695007	18.422677	54.693555	18.426393	54.691556	18.425256	54.693084	18.419877
Michał Korthals	8	19	19_44/2_w2	168/18/1575	19_44/2	2018-06-22	2018-07-03	Pyrifenox	mg/kg	0.03	p.0,03		-	1	Eurofins	SFBA0-7	3.51	54.695007	18.422677	54.693555	18.426393	54.691556	18.425256	54.693084	18.419877
Michał Korthals	8	19	19_44/2_w2	168/18/1575	19_44/2	2018-06-22	2018-07-03	Pirimithate	mg/kg	0.15	p.0,15		-	1	Eurofins	SFBA0-7	3.51	54.695007	18.422677	54.693555	18.426393	54.691556	18.425256	54.693084	18.419877
Michał Korthals	8	19	19_44/2_w2	168/18/1575	19_44/2	2018-06-22	2018-07-03	Chinalofos	mg/kg	0.015	p.0,015		-	1	Eurofins	SFBA0-7	3.51	54.695007	18.422677	54.693555	18.426393	54.691556	18.425256	54.693084	18.419877
Michał Korthals	8	19	19_44/2_w2	168/18/1575	19_44/2	2018-06-22	2018-07-03	Chinoksyfen	mg/kg	0.045	p.0,045		-	1	Eurofins	SFBA0-7	3.51	54.695007	18.422677	54.693555	18.426393	54.691556	18.425256	54.693084	18.419877
Michał Korthals	8	19	19_44/2_w2	168/18/1575	19_44/2	2018-06-22	2018-07-03	Kwintocen	mg/kg	0.015	p.0,015		-	1	Eurofins	SFBA0-7	3.51	54.695007	18.422677	54.693555	18.426393	54.691556	18.425256	54.693084	18.419877
Michał Korthals	8	19	19_44/2_w2	168/18/1575	19_44/2	2018-06-22	2018-07-03	Quintozene (suma)	mg/kg	0.015	p.0,015		-	1	Eurofins	SFBA0-7	3.51	54.695007	18.422677	54.693555	18.426393	54.691556	18.425256	54.693084	18.419877
Michał Korthals	8	19	19_44/2_w2	168/18/1575	19_44/2	2018-06-22	2018-07-03	Chizalofop etylowy	mg/kg	0.03	p.0,03		-	1	Eurofins	SFBA0-7	3.51	54.695007	18.422677	54.693555	18.426393	54.691556	18.425256	54.693084	18.419877
Michał Korthals	8	19	19_44/2_w2	168/18/1575	19_44/2	2018-06-22	2018-07-03	Resmetryna	mg/kg	0.3	p.0,3		-	1	Eurofins	SFBA0-7	3.51	54.695007	18.422677	54.693555	18.426393	54.691556	18.425256	54.693084	18.419877
Michał Korthals	8	19	19_44/2_w2	168/18/1575	19_44/2	2018-06-22	2018-07-03	S421 Octachlordipropyleter)	mg/kg	0.03	p.0,03		-	1	Eurofins	SFBA0-7	3.51	54.695007	18.422677	54.693555	18.426393	54.691556	18.425256	54.693084	18.419877
Michał Korthals	8	19	19_44/2_w2	168/18/1575	19_44/2	2018-06-22	2018-07-03	Spiromesifen	mg/kg	0.03	p.0,03		-	1	Eurofins	SFBA0-7	3.51	54.695007	18.422677	54.693555	18.426393	54.691556	18.425256	54.693084	18.419877
Michał Korthals	8	19	19_44/2_w2	168/18/1575	19_44/2	2018-06-22	2018-07-03	Sulfotep	mg/kg	0.03	p.0,03		-	1	Eurofins	SFBA0-7	3.51	54.695007	18.422677	54.693555	18.426393	54.691556	18.425256	54.693084	18.419877
Michał Korthals	8	19	19_44/2_w2	168/18/1575	19_44/2	2018-06-22	2018-07-03	Sulprofos	mg/kg	0.03	p.0,03		-	1	Eurofins	SFBA0-7	3.51	54.695007	18.422677	54.693555	18.426393	54.691556	18.425256	54.693084	18.419877
Michał Korthals	8	19	19_44/2_w2	168/18/1575	19_44/2	2018-06-22	2018-07-03	Swep	mg/kg	0.03	p.0,03		-	1	Eurofins	SFBA0-7	3.51	54.695007	18.422677	54.693555	18.426393	54.691556	18.425256	54.693084	18.419877
Michał Korthals	8	19	19_44/2_w2	168/18/1575	19_44/2	2018-06-22	2018-07-03	tau-Fluvalinate	mg/kg	0.015	p.0,015		-	1	Eurofins	SFBA0-7	3.51	54.695007	18.422677	54.693555	18.426393	54.691556	18.425256	54.693084	18.419877
Michał Korthals	8	19	19_44/2_w2	168/18/1575	19_44/2	2018-06-22	2018-07-03	Tebupirimfos	mg/kg	0.015	p.0,015		-	1	Eurofins	SFBA0-7	3.51	54.695007	18.422677	54.693555	18.426393	54.691556	18.425256	54.693084	18.419877
Michał Korthals	8	19	19_44/2_w2	168/18/1575	19_44/2	2018-06-22	2018-07-03	Technazen	mg/kg	0.015	p.0,015		-	1	Eurofins	SFBA0-7	3.51	54.695007	18.422677	54.693555	18.426393	54.691556	18.425256	54.693084	18.419877
Michał Korthals	8	19	19_44/2_w2	168/18/1575	19_44/2	2018-06-22	2018-07-03	Teflutryna	mg/kg	0.015	p.0,015		-	1	Eurofins	SFBA0-7	3.51	54.695007	18.422677	54.693555	18.426393	54.691556	18.425256	54.693084	18.419877
Michał Korthals	8	19	19_44/2_w2	168/18/1575	19_44/2	2018-06-22	2018-07-03	Temephos	mg/kg	0.03	p.0,03		-	1	Eurofins	SFBA0-7	3.51	54.695007	18.422677	54.693555	18.426393	54.691556	18.425256	54.693084	18.419877
Michał Korthals	8	19	19_44/2_w2	168/18/1575	19_44/2	2018-06-22	2018-07-03	Terbufos	mg/kg	0.015	p.0,015		-	1	Eurofins	SFBA0-7	3.51	54.695007	18.422677	54.693555	18.426393	54.691556	18.425256	54.693084	18.419877
Michał Korthals	8	19	19_44/2_w2	168/18/1575	19_44/2	2018-06-22	2018-07-03	Tetrachlorwinfos	mg/kg	0.015	p.0,015		-	1	Eurofins	SFBA0-7	3.51	54.695007	18.422677	54.693555	18.426393	54.691556	18.425256	54.693084	18.419877
Michał Korthals	8	19	19_44/2_w2	168/18/1575	19_44/2	2018-06-22	2018-07-03	Tetrakonazol	mg/kg	0.075	p.0,075		-	1	Eurofins	SFBA0-7	3.51	54.695007	18.422677	54.693555	18.426393	54.691556	18.425256	54.693084	18.419877
Michał Korthals	8	19	19_44/2_w2	168/18/1575	19_44/2	2018-06-22	2018-07-03	Tetradifon	mg/kg	0.015	p.0,015		-	1	Eurofins	SFBA0-7	3.51	54.695007	18.422677	54.693555	18.426393	54.691556	18.425256	54.693084	18.419877
Michał Korthals	8	19	19_44/2_w2	168/18/1575	19_44/2	2018-06-22	2018-07-03	Tetrametryna	mg/kg	0.03	p.0,03		-	1	Eurofins	SFBA0-7	3.51	54.695007	18.422677	54.693555	18.426393	54.691556	18.425256	54.693084	18.419877
Michał Korthals	8	19	19_44/2_w2	168/18/1575	19_44/2	2018-06-22	2018-07-03	Tetrasul	mg/kg	0.03	p.0,03		-	1	Eurofins	SFBA0-7	3.51	54.695007	18.422677	54.693555	18.426393	54.691556	18.425256	54.693084	18.419877
Michał Korthals	8	19	19_44/2_w2	168/18/1575	19_44/2	2018-06-22	2018-07-03	Tolklofos metylu	mg/kg	0.03	p.0,03		-	1	Eurofins	SFBA0-7	3.51	54.695007	18.422677	54.693555	18.426393	54.691556	18.425256	54.693084	18.419877
Michał Korthals	8	19	19_44/2_w2	168/18/1575	19_44/2	2018-06-22	2018-07-03	Tolilofluanid	mg/kg	0.03	p.0,03		-	1	Eurofins	SFBA0-7	3.51	54.695007	18.422677	54.693555	18.426393	54.691556	18.425256	54.693084	18.419877
Michał Korthals	8	19	19_44/2_w2	168/18/1575	19_44/2	2018-06-22	2018-07-03	Toxaphene Parlar 26	mg/kg	0.01	p.0,01		-	1	Eurofins	SFBA0-7	3.51	54.695007	18.422677	54.693555	18.426393	54.691556	18.425256	54.693084	18.419877
Michał Korthals	8	19	19_44/2_w2	168/18/1575	19_44/2	2018-06-22	2018-07-03	Toxaphene Parlar 50	mg/kg	0.01	p.0,01		-	1	Eurofins	SFBA0-7	3.51	54.695007	18.422677	54.693555	18.426393	54.691556	18.425256	54.693084	18.419877
Michał Korthals	8	19	19_44/2_w2	168/18/1575	19_44/2	2018-06-22	2018-07-03	Toxaphene Parlar 62	mg/kg	0.01	p.0,01		-	1	Eurofins	SFBA0-7	3.51	54.695007	18.422677	54.693555	18.426393	54.691556	18.425256	54.693084	18.419877
Michał Korthals	8	19	19_44/2_w2	168/18/1575	19_44/2	2018-06-22	2018-07-03	Transfluthrin	mg/kg	0.03	p.0,03		-	1	Eurofins	SFBA0-7	3.51	54.695007	18.422677	54.693555	18.426393	54.691556	18.425256	54.693084	18.419877
Michał Korthals	8	19	19_44/2_w2	168/18/1575	19_44/2	2018-06-22	2018-07-03	Triadimefon	mg/kg	0.03	p.0,03		-	1	Eurofins	SFBA0-7	3.51	54.695007	18.422677	54.693555	18.426393	54.691556	18.425256	54.693084	18.419877
Michał Korthals	8	19	19_44/2_w2	168/18/1575	19_44/2	2018-06-22	2018-07-03	Triadimenol	mg/kg	0.15	p.0,15		-	1	Eurofins	SFBA0-7	3.51	54.695007	18.422677	54.693555	18.426393	54.691556	18.425256	54.693084	18.419877
Michał Korthals	8	19	19_44/2_w2	168/18/1575	19_44/2	2018-06-22	2018-07-03	Triadimenol/Triadimefon(suma)	mg/kg	0.15	p.0,15		-	1	Eurofins	SFBA0-7	3.51	54.695007	18.422677	54.693555	18.426393	54.691556	18.425256	54.693084	18.419877
Michał Korthals	8	19	19_44/2_w2	168/18/1575	19_44/2	2018-06-22	2018-07-03	Trialat	mg/kg	0.03	p.0,03		-	1	Eurofins	SFBA0-7	3.51	54.695007	18.422677	54.693555	18.426393	54.691556	18.425256	54.693084	18.419877
Michał Korthals	8	19	19_44/2_w2	168/18/1575	19_44/2	2018-06-22	2018-07-03	Triamiphos	mg/kg	0.075	p.0,075		-	1	Eurofins	SFBA0-7	3.51	54.695007	18.422677	54.693555	18.426393	54.691556	18.425256	54.693084	18.419877
Michał Korthals	8	19	19_44/2_w2	168/18/1575	19_44/2	2018-06-22	2018-07-03	Triazofos	mg/kg	0.06	p.0,06		-	1	Eurofins	SFBA0-7	3.51	54.695007	18.422677	54.693555	18.426393	54.691556	18.425256	54.693084	18.419877
Michał Korthals	8	19	19_44/2_w2	168/18/1575	19_44/2	2018-06-22	2018-07-03	Tribufos	mg/kg	0.03	p.0,03		-	1	Eurofins	SFBA0-7	3.51	54.695007	18.422677	54.693555	18.426393	54.691556	18.425256	54.693084	18.419877
Michał Korthals	8	19	19_44/2_w2	168/18/1575	19_44/2	2018-06-22	2018-07-03	Trichloronat	mg/kg	0.015	p.0,015		-	1	Eurofins	SFBA0-7	3.51	54.695007	18.422677	54.693555	18.426393	54.691556	18.425256	54.693084	18.419877
Michał Korthals	8	19	19_44/2_w2	168/18/1575	19_44/2	2018-06-22	2018-07-03	Tridiphane	mg/kg	0.15	p.0,15		-	1	Eurofins	SFBA0-7	3.51	54.695007	18.422677	54.693555	18.426393	54.691556	18.425256	54.693084	18.419877
Michał Korthals	8	19	19_44/2_w2	168/18/1575	19_44/2	2018-06-22	2018-07-03	Trifloksystrobina	mg/kg	0.03	p.0,03		-	1	Eurofins	SFBA0-7	3.51	54.695007	18.422677	54.693555	18.426393	54.691556	18.425256	54.693084	18.419877
Michał Korthals	8	19	19_44/2_w2	168/18/1575	19_44/2	2018-06-22	2018-07-03	Trifluralina	mg/kg	0.015	p.0,015		-	1	Eurofins	SFBA0-7	3.51	54.695007	18.422677	54.693555	18.426393	54.691556	18.425256	54.693084	18.419877
Michał Korthals	8	19	19_44/2_w2	168/18/1575	19_44/2	2018-06-22	2018-07-03	Vamidothion	mg/kg	0.03	p.0,03		-	1	Eurofins	SFBA0-7	3.51	54.695007	18.422677	54.693555	18.426393	54.691556	18.425256	54.693084	18.419877
Michał Korthals	8	19	19_44/2_w2	168/18/1575	19_44/2	2018-06-22	2018-07-03	Winklozolina	mg/kg	0.015	p.0,015		-	1	Eurofins	SFBA0-7	3.51	54.695007	18.422677	54.693555	18.426393	54.691556	18.425256	54.693084	18.419877
Michał Korthals	8	19	19_44/2_w2	168/18/1575	19_44/2	2018-06-22	2018-07-03	Glifosat	mg/kg	0.05	0.28	±	0.14	0	Eurofins	SF130-4	3.51	54.695007	18.422677	54.693555	18.426393	54.691556	18.425256	54.693084	18.419877
Michał Korthals	8	19	19_44/2_w2	168/18/1575	19_44/2	2018-06-22	2018-07-03	Glufosynat	mg/kg	0.05	p.0,05		-	1	Eurofins	SF130-4	3.51	54.695007	18.422677	54.693555	18.426393	54.691556	18.425256	54.693084	18.419877
Michał Korthals	8	19	19_44/2_w2	168/18/1575	19_44/2	2018-06-22	2018-07-03	Kwas aminometylofosfonowy (AMPA)	mg/kg	0.05	0.34	±	0.17	0	Eurofins	SF130-4	3.51	54.695007	18.422677	54.693555	18.426393	54.691556	18.425256	54.693084	18.419877
Stanisłw Selke	7	12	12_66_w2	168/18/1576	12_66	2018-06-22	2018-07-03	2,4,5-T-Methylester	mg/kg	0.03	p.0,03		-	1	Eurofins	SFBA0-7	5.37	54.678734	18.342915	54.678813	18.346460	54.676754	18.348094	54.677199	18.343460
Stanisłw Selke	7	12	12_66_w2	168/18/1576	12_66	2018-06-22	2018-07-03	2,4-D-Methylester	mg/kg	0.03	p.0,03		-	1	Eurofins	SFBA0-7	5.37	54.678734	18.342915	54.678813	18.346460	54.676754	18.348094	54.677199	18.343460
Stanisłw Selke	7	12	12_66_w2	168/18/1576	12_66	2018-06-22	2018-07-03	Acetochlor	mg/kg	0.15	p.0,15		-	1	Eurofins	SFBA0-7	5.37	54.678734	18.342915	54.678813	18.346460	54.676754	18.348094	54.677199	18.343460
Stanisłw Selke	7	12	12_66_w2	168/18/1576	12_66	2018-06-22	2018-07-03	Aclonifen	mg/kg	0.06	p.0,06		-	1	Eurofins	SFBA0-7	5.37	54.678734	18.342915	54.678813	18.346460	54.676754	18.348094	54.677199	18.343460
Stanisłw Selke	7	12	12_66_w2	168/18/1576	12_66	2018-06-22	2018-07-03	Akrynatryna	mg/kg	0.03	p.0,03		-	1	Eurofins	SFBA0-7	5.37	54.678734	18.342915	54.678813	18.346460	54.676754	18.348094	54.677199	18.343460
Stanisłw Selke	7	12	12_66_w2	168/18/1576	12_66	2018-06-22	2018-07-03	Alachlor	mg/kg	0.03	p.0,03		-	1	Eurofins	SFBA0-7	5.37	54.678734	18.342915	54.678813	18.346460	54.676754	18.348094	54.677199	18.343460
Stanisłw Selke	7	12	12_66_w2	168/18/1576	12_66	2018-06-22	2018-07-03	Aldryna	mg/kg	0.015	p.0,015		-	1	Eurofins	SFBA0-7	5.37	54.678734	18.342915	54.678813	18.346460	54.676754	18.348094	54.677199	18.343460
Stanisłw Selke	7	12	12_66_w2	168/18/1576	12_66	2018-06-22	2018-07-03	Aldryna+Dieldryna	mg/kg	0.015	p.0,015		-	1	Eurofins	SFBA0-7	5.37	54.678734	18.342915	54.678813	18.346460	54.676754	18.348094	54.677199	18.343460
Stanisłw Selke	7	12	12_66_w2	168/18/1576	12_66	2018-06-22	2018-07-03	Alletryna	mg/kg	0.03	p.0,03		-	1	Eurofins	SFBA0-7	5.37	54.678734	18.342915	54.678813	18.346460	54.676754	18.348094	54.677199	18.343460
Stanisłw Selke	7	12	12_66_w2	168/18/1576	12_66	2018-06-22	2018-07-03	Amidithion	mg/kg	0.03	p.0,03		-	1	Eurofins	SFBA0-7	5.37	54.678734	18.342915	54.678813	18.346460	54.676754	18.348094	54.677199	18.343460
Stanisłw Selke	7	12	12_66_w2	168/18/1576	12_66	2018-06-22	2018-07-03	Antrachinon	mg/kg	0.06	p.0,06		-	1	Eurofins	SFBA0-7	5.37	54.678734	18.342915	54.678813	18.346460	54.676754	18.348094	54.677199	18.343460
Stanisłw Selke	7	12	12_66_w2	168/18/1576	12_66	2018-06-22	2018-07-03	Atrazyna	mg/kg	0.15	p.0,15		-	1	Eurofins	SFBA0-7	5.37	54.678734	18.342915	54.678813	18.346460	54.676754	18.348094	54.677199	18.343460
Stanisłw Selke	7	12	12_66_w2	168/18/1576	12_66	2018-06-22	2018-07-03	Azakonazol	mg/kg	0.03	p.0,03		-	1	Eurofins	SFBA0-7	5.37	54.678734	18.342915	54.678813	18.346460	54.676754	18.348094	54.677199	18.343460
Stanisłw Selke	7	12	12_66_w2	168/18/1576	12_66	2018-06-22	2018-07-03	Azynofos etylowy	mg/kg	0.03	p.0,03		-	1	Eurofins	SFBA0-7	5.37	54.678734	18.342915	54.678813	18.346460	54.676754	18.348094	54.677199	18.343460
Stanisłw Selke	7	12	12_66_w2	168/18/1576	12_66	2018-06-22	2018-07-03	Azynofos metylowy	mg/kg	0.03	p.0,03		-	1	Eurofins	SFBA0-7	5.37	54.678734	18.342915	54.678813	18.346460	54.676754	18.348094	54.677199	18.343460
Stanisłw Selke	7	12	12_66_w2	168/18/1576	12_66	2018-06-22	2018-07-03	Azoksystrobina	mg/kg	0.03	p.0,03		-	1	Eurofins	SFBA0-7	5.37	54.678734	18.342915	54.678813	18.346460	54.676754	18.348094	54.677199	18.343460
Stanisłw Selke	7	12	12_66_w2	168/18/1576	12_66	2018-06-22	2018-07-03	Benfluralin	mg/kg	0.015	p.0,015		-	1	Eurofins	SFBA0-7	5.37	54.678734	18.342915	54.678813	18.346460	54.676754	18.348094	54.677199	18.343460
Stanisłw Selke	7	12	12_66_w2	168/18/1576	12_66	2018-06-22	2018-07-03	Benoxacor	mg/kg	0.03	p.0,03		-	1	Eurofins	SFBA0-7	5.37	54.678734	18.342915	54.678813	18.346460	54.676754	18.348094	54.677199	18.343460
Stanisłw Selke	7	12	12_66_w2	168/18/1576	12_66	2018-06-22	2018-07-03	Benzoylprop-ethyl	mg/kg	0.15	p.0,15		-	1	Eurofins	SFBA0-7	5.37	54.678734	18.342915	54.678813	18.346460	54.676754	18.348094	54.677199	18.343460
Stanisłw Selke	7	12	12_66_w2	168/18/1576	12_66	2018-06-22	2018-07-03	Biofenox	mg/kg	0.03	p.0,03		-	1	Eurofins	SFBA0-7	5.37	54.678734	18.342915	54.678813	18.346460	54.676754	18.348094	54.677199	18.343460
Stanisłw Selke	7	12	12_66_w2	168/18/1576	12_66	2018-06-22	2018-07-03	Binapacryl	mg/kg	0.015	p.0,15		-	1	Eurofins	SFBA0-7	5.37	54.678734	18.342915	54.678813	18.346460	54.676754	18.348094	54.677199	18.343460
Stanisłw Selke	7	12	12_66_w2	168/18/1576	12_66	2018-06-22	2018-07-03	Bifentryna	mg/kg	0.06	p.0,06		-	1	Eurofins	SFBA0-7	5.37	54.678734	18.342915	54.678813	18.346460	54.676754	18.348094	54.677199	18.343460
Stanisłw Selke	7	12	12_66_w2	168/18/1576	12_66	2018-06-22	2018-07-03	Bitertanol	mg/kg	0.15	p.0,15		-	1	Eurofins	SFBA0-7	5.37	54.678734	18.342915	54.678813	18.346460	54.676754	18.348094	54.677199	18.343460
Stanisłw Selke	7	12	12_66_w2	168/18/1576	12_66	2018-06-22	2018-07-03	Boskalid	mg/kg	0.09	p.0,09		-	1	Eurofins	SFBA0-7	5.37	54.678734	18.342915	54.678813	18.346460	54.676754	18.348094	54.677199	18.343460
Stanisłw Selke	7	12	12_66_w2	168/18/1576	12_66	2018-06-22	2018-07-03	Bromofenvinphos	mg/kg	0.03	p.0,03		-	1	Eurofins	SFBA0-7	5.37	54.678734	18.342915	54.678813	18.346460	54.676754	18.348094	54.677199	18.343460
Stanisłw Selke	7	12	12_66_w2	168/18/1576	12_66	2018-06-22	2018-07-03	Bromocyclen	mg/kg	0.03	p.0,03		-	1	Eurofins	SFBA0-7	5.37	54.678734	18.342915	54.678813	18.346460	54.676754	18.348094	54.677199	18.343460
Stanisłw Selke	7	12	12_66_w2	168/18/1576	12_66	2018-06-22	2018-07-03	Bromofos metylowy	mg/kg	0.015	p.0,015		-	1	Eurofins	SFBA0-7	5.37	54.678734	18.342915	54.678813	18.346460	54.676754	18.348094	54.677199	18.343460
Stanisłw Selke	7	12	12_66_w2	168/18/1576	12_66	2018-06-22	2018-07-03	Bromofos etylowy	mg/kg	0.015	p.0,015		-	1	Eurofins	SFBA0-7	5.37	54.678734	18.342915	54.678813	18.346460	54.676754	18.348094	54.677199	18.343460
Stanisłw Selke	7	12	12_66_w2	168/18/1576	12_66	2018-06-22	2018-07-03	Bromopropylat	mg/kg	0.03	p.0,03		-	1	Eurofins	SFBA0-7	5.37	54.678734	18.342915	54.678813	18.346460	54.676754	18.348094	54.677199	18.343460
Stanisłw Selke	7	12	12_66_w2	168/18/1576	12_66	2018-06-22	2018-07-03	Buprofezyna	mg/kg	0.15	p.0,15		-	1	Eurofins	SFBA0-7	5.37	54.678734	18.342915	54.678813	18.346460	54.676754	18.348094	54.677199	18.343460
Stanisłw Selke	7	12	12_66_w2	168/18/1576	12_66	2018-06-22	2018-07-03	Butachlor	mg/kg	0.03	p.0,03		-	1	Eurofins	SFBA0-7	5.37	54.678734	18.342915	54.678813	18.346460	54.676754	18.348094	54.677199	18.343460
Stanisłw Selke	7	12	12_66_w2	168/18/1576	12_66	2018-06-22	2018-07-03	Butamifos	mg/kg	0.015	p.0,015		-	1	Eurofins	SFBA0-7	5.37	54.678734	18.342915	54.678813	18.346460	54.676754	18.348094	54.677199	18.343460
Stanisłw Selke	7	12	12_66_w2	168/18/1576	12_66	2018-06-22	2018-07-03	Butralin	mg/kg	0.03	p.0,03		-	1	Eurofins	SFBA0-7	5.37	54.678734	18.342915	54.678813	18.346460	54.676754	18.348094	54.677199	18.343460
Stanisłw Selke	7	12	12_66_w2	168/18/1576	12_66	2018-06-22	2018-07-03	Kadusafos	mg/kg	0.03	p.0,03		-	1	Eurofins	SFBA0-7	5.37	54.678734	18.342915	54.678813	18.346460	54.676754	18.348094	54.677199	18.343460
Stanisłw Selke	7	12	12_66_w2	168/18/1576	12_66	2018-06-22	2018-07-03	Kaptafol	mg/kg	0.03	p.0,03		-	1	Eurofins	SFBA0-7	5.37	54.678734	18.342915	54.678813	18.346460	54.676754	18.348094	54.677199	18.343460
Stanisłw Selke	7	12	12_66_w2	168/18/1576	12_66	2018-06-22	2018-07-03	Kaptan	mg/kg	0.03	p.0,03		-	1	Eurofins	SFBA0-7	5.37	54.678734	18.342915	54.678813	18.346460	54.676754	18.348094	54.677199	18.343460
Stanisłw Selke	7	12	12_66_w2	168/18/1576	12_66	2018-06-22	2018-07-03	Karbofenotion	mg/kg	0.015	p.0,015		-	1	Eurofins	SFBA0-7	5.37	54.678734	18.342915	54.678813	18.346460	54.676754	18.348094	54.677199	18.343460
Stanisłw Selke	7	12	12_66_w2	168/18/1576	12_66	2018-06-22	2018-07-03	Carbophenothion-methyl	mg/kg	0.03	p.0,03		-	1	Eurofins	SFBA0-7	5.37	54.678734	18.342915	54.678813	18.346460	54.676754	18.348094	54.677199	18.343460
Stanisłw Selke	7	12	12_66_w2	168/18/1576	12_66	2018-06-22	2018-07-03	Carfentrazone-ethyl	mg/kg	0.03	p.0,03		-	1	Eurofins	SFBA0-7	5.37	54.678734	18.342915	54.678813	18.346460	54.676754	18.348094	54.677199	18.343460
Stanisłw Selke	7	12	12_66_w2	168/18/1576	12_66	2018-06-22	2018-07-03	Chinometionat	mg/kg	0.015	p.0,015		-	1	Eurofins	SFBA0-7	5.37	54.678734	18.342915	54.678813	18.346460	54.676754	18.348094	54.677199	18.343460
Stanisłw Selke	7	12	12_66_w2	168/18/1576	12_66	2018-06-22	2018-07-03	Chlorbenzyd	mg/kg	0.015	p.0,015		-	1	Eurofins	SFBA0-7	5.37	54.678734	18.342915	54.678813	18.346460	54.676754	18.348094	54.677199	18.343460
Stanisłw Selke	7	12	12_66_w2	168/18/1576	12_66	2018-06-22	2018-07-03	Chlordane (total)	mg/kg	0.03	p.0,03		-	1	Eurofins	SFBA0-7	5.37	54.678734	18.342915	54.678813	18.346460	54.676754	18.348094	54.677199	18.343460
Stanisłw Selke	7	12	12_66_w2	168/18/1576	12_66	2018-06-22	2018-07-03	Chlordan,cis-	mg/kg	0.015	p.0,015		-	1	Eurofins	SFBA0-7	5.37	54.678734	18.342915	54.678813	18.346460	54.676754	18.348094	54.677199	18.343460
Stanisłw Selke	7	12	12_66_w2	168/18/1576	12_66	2018-06-22	2018-07-03	Chlordan,oxy-	mg/kg	0.03	p.0,03		-	1	Eurofins	SFBA0-7	5.37	54.678734	18.342915	54.678813	18.346460	54.676754	18.348094	54.677199	18.343460
Stanisłw Selke	7	12	12_66_w2	168/18/1576	12_66	2018-06-22	2018-07-03	Chlordan,gamma/trans-	mg/kg	0.015	p.0,015		-	1	Eurofins	SFBA0-7	5.37	54.678734	18.342915	54.678813	18.346460	54.676754	18.348094	54.677199	18.343460
Stanisłw Selke	7	12	12_66_w2	168/18/1576	12_66	2018-06-22	2018-07-03	Chlordecon	mg/kg	0.03	p.0,03		-	1	Eurofins	SFBA0-7	5.37	54.678734	18.342915	54.678813	18.346460	54.676754	18.348094	54.677199	18.343460
Stanisłw Selke	7	12	12_66_w2	168/18/1576	12_66	2018-06-22	2018-07-03	Chlorethoksyfos	mg/kg	0.015	p.0,015		-	1	Eurofins	SFBA0-7	5.37	54.678734	18.342915	54.678813	18.346460	54.676754	18.348094	54.677199	18.343460
Stanisłw Selke	7	12	12_66_w2	168/18/1576	12_66	2018-06-22	2018-07-03	Chlorfenapyr	mg/kg	0.015	p.0,015		-	1	Eurofins	SFBA0-7	5.37	54.678734	18.342915	54.678813	18.346460	54.676754	18.348094	54.677199	18.343460
Stanisłw Selke	7	12	12_66_w2	168/18/1576	12_66	2018-06-22	2018-07-03	Chlorfenprop-methyl	mg/kg	0.03	p.0,03		-	1	Eurofins	SFBA0-7	5.37	54.678734	18.342915	54.678813	18.346460	54.676754	18.348094	54.677199	18.343460
Stanisłw Selke	7	12	12_66_w2	168/18/1576	12_66	2018-06-22	2018-07-03	Chlorfenson	mg/kg	0.015	p.0,015		-	1	Eurofins	SFBA0-7	5.37	54.678734	18.342915	54.678813	18.346460	54.676754	18.348094	54.677199	18.343460
Stanisłw Selke	7	12	12_66_w2	168/18/1576	12_66	2018-06-22	2018-07-03	Chlorfenwinfos	mg/kg	0.03	p.0,03		-	1	Eurofins	SFBA0-7	5.37	54.678734	18.342915	54.678813	18.346460	54.676754	18.348094	54.677199	18.343460
Stanisłw Selke	7	12	12_66_w2	168/18/1576	12_66	2018-06-22	2018-07-03	Chloridazon	mg/kg	0.03	p.0,03		-	1	Eurofins	SFBA0-7	5.37	54.678734	18.342915	54.678813	18.346460	54.676754	18.348094	54.677199	18.343460
Stanisłw Selke	7	12	12_66_w2	168/18/1576	12_66	2018-06-22	2018-07-03	Chlormephos	mg/kg	0.015	p.0,015		-	1	Eurofins	SFBA0-7	5.37	54.678734	18.342915	54.678813	18.346460	54.676754	18.348094	54.677199	18.343460
Stanisłw Selke	7	12	12_66_w2	168/18/1576	12_66	2018-06-22	2018-07-03	Chlorobenzylat	mg/kg	0.015	p.0,015		-	1	Eurofins	SFBA0-7	5.37	54.678734	18.342915	54.678813	18.346460	54.676754	18.348094	54.677199	18.343460
Stanisłw Selke	7	12	12_66_w2	168/18/1576	12_66	2018-06-22	2018-07-03	Chloroneb	mg/kg	0.03	p.0,03		-	1	Eurofins	SFBA0-7	5.37	54.678734	18.342915	54.678813	18.346460	54.676754	18.348094	54.677199	18.343460
Stanisłw Selke	7	12	12_66_w2	168/18/1576	12_66	2018-06-22	2018-07-03	Chloropropylat	mg/kg	0.015	p.0,015		-	1	Eurofins	SFBA0-7	5.37	54.678734	18.342915	54.678813	18.346460	54.676754	18.348094	54.677199	18.343460
Stanisłw Selke	7	12	12_66_w2	168/18/1576	12_66	2018-06-22	2018-07-03	Chlorotalonil	mg/kg	0.015	p.0,015		-	1	Eurofins	SFBA0-7	5.37	54.678734	18.342915	54.678813	18.346460	54.676754	18.348094	54.677199	18.343460
Stanisłw Selke	7	12	12_66_w2	168/18/1576	12_66	2018-06-22	2018-07-03	Chlorpiryfos etylowy	mg/kg	0.015	p.0,015		-	1	Eurofins	SFBA0-7	5.37	54.678734	18.342915	54.678813	18.346460	54.676754	18.348094	54.677199	18.343460
Stanisłw Selke	7	12	12_66_w2	168/18/1576	12_66	2018-06-22	2018-07-03	Chlorpiryfos metylowy	mg/kg	0.015	p.0,015		-	1	Eurofins	SFBA0-7	5.37	54.678734	18.342915	54.678813	18.346460	54.676754	18.348094	54.677199	18.343460
Stanisłw Selke	7	12	12_66_w2	168/18/1576	12_66	2018-06-22	2018-07-03	Chlorthal-dimethyl	mg/kg	0.015	p.0,015		-	1	Eurofins	SFBA0-7	5.37	54.678734	18.342915	54.678813	18.346460	54.676754	18.348094	54.677199	18.343460
Stanisłw Selke	7	12	12_66_w2	168/18/1576	12_66	2018-06-22	2018-07-03	Chlorotion	mg/kg	0.03	p.0,03		-	1	Eurofins	SFBA0-7	5.37	54.678734	18.342915	54.678813	18.346460	54.676754	18.348094	54.677199	18.343460
Stanisłw Selke	7	12	12_66_w2	168/18/1576	12_66	2018-06-22	2018-07-03	Chlortiofos	mg/kg	0.015	p.0,015		-	1	Eurofins	SFBA0-7	5.37	54.678734	18.342915	54.678813	18.346460	54.676754	18.348094	54.677199	18.343460
Stanisłw Selke	7	12	12_66_w2	168/18/1576	12_66	2018-06-22	2018-07-03	Chlozolinate	mg/kg	0.03	p.0,03		-	1	Eurofins	SFBA0-7	5.37	54.678734	18.342915	54.678813	18.346460	54.676754	18.348094	54.677199	18.343460
Stanisłw Selke	7	12	12_66_w2	168/18/1576	12_66	2018-06-22	2018-07-03	Cinidon-ethyl	mg/kg	0.03	p.0,03		-	1	Eurofins	SFBA0-7	5.37	54.678734	18.342915	54.678813	18.346460	54.676754	18.348094	54.677199	18.343460
Stanisłw Selke	7	12	12_66_w2	168/18/1576	12_66	2018-06-22	2018-07-03	Clodinafop-propargyl	mg/kg	0.09	p.0,09		-	1	Eurofins	SFBA0-7	5.37	54.678734	18.342915	54.678813	18.346460	54.676754	18.348094	54.677199	18.343460
Stanisłw Selke	7	12	12_66_w2	168/18/1576	12_66	2018-06-22	2018-07-03	Kumafos	mg/kg	0.015	p.0,015		-	1	Eurofins	SFBA0-7	5.37	54.678734	18.342915	54.678813	18.346460	54.676754	18.348094	54.677199	18.343460
Stanisłw Selke	7	12	12_66_w2	168/18/1576	12_66	2018-06-22	2018-07-03	Crotoxyphos	mg/kg	0.03	p.0,03		-	1	Eurofins	SFBA0-7	5.37	54.678734	18.342915	54.678813	18.346460	54.676754	18.348094	54.677199	18.343460
Stanisłw Selke	7	12	12_66_w2	168/18/1576	12_66	2018-06-22	2018-07-03	Cyjanofenfos	mg/kg	0.03	p.0,03		-	1	Eurofins	SFBA0-7	5.37	54.678734	18.342915	54.678813	18.346460	54.676754	18.348094	54.677199	18.343460
Stanisłw Selke	7	12	12_66_w2	168/18/1576	12_66	2018-06-22	2018-07-03	Cyanophos	mg/kg	0.03	p.0,03		-	1	Eurofins	SFBA0-7	5.37	54.678734	18.342915	54.678813	18.346460	54.676754	18.348094	54.677199	18.343460
Stanisłw Selke	7	12	12_66_w2	168/18/1576	12_66	2018-06-22	2018-07-03	Cyflutryna	mg/kg	0.03	p.0,03		-	1	Eurofins	SFBA0-7	5.37	54.678734	18.342915	54.678813	18.346460	54.676754	18.348094	54.677199	18.343460
Stanisłw Selke	7	12	12_66_w2	168/18/1576	12_66	2018-06-22	2018-07-03	lambda-Cyhalotryna	mg/kg	0.03	p.0,03		-	1	Eurofins	SFBA0-7	5.37	54.678734	18.342915	54.678813	18.346460	54.676754	18.348094	54.677199	18.343460
Stanisłw Selke	7	12	12_66_w2	168/18/1576	12_66	2018-06-22	2018-07-03	Cypermetryna	mg/kg	0.015	p.0,015		-	1	Eurofins	SFBA0-7	5.37	54.678734	18.342915	54.678813	18.346460	54.676754	18.348094	54.677199	18.343460
Stanisłw Selke	7	12	12_66_w2	168/18/1576	12_66	2018-06-22	2018-07-03	Cyphenothrin	mg/kg	0.03	p.0,03		-	1	Eurofins	SFBA0-7	5.37	54.678734	18.342915	54.678813	18.346460	54.676754	18.348094	54.677199	18.343460
Stanisłw Selke	7	12	12_66_w2	168/18/1576	12_66	2018-06-22	2018-07-03	Cyprokonazol	mg/kg	0.12	p.0,12		-	1	Eurofins	SFBA0-7	5.37	54.678734	18.342915	54.678813	18.346460	54.676754	18.348094	54.677199	18.343460
Stanisłw Selke	7	12	12_66_w2	168/18/1576	12_66	2018-06-22	2018-07-03	DDD-o,p	mg/kg	0.015	p.0,015		-	1	Eurofins	SFBA0-7	5.37	54.678734	18.342915	54.678813	18.346460	54.676754	18.348094	54.677199	18.343460
Stanisłw Selke	7	12	12_66_w2	168/18/1576	12_66	2018-06-22	2018-07-03	DDE-o,p	mg/kg	0.015	p.0,015		-	1	Eurofins	SFBA0-7	5.37	54.678734	18.342915	54.678813	18.346460	54.676754	18.348094	54.677199	18.343460
Stanisłw Selke	7	12	12_66_w2	168/18/1576	12_66	2018-06-22	2018-07-03	DDT(p,p'-DDT+o,p'-DDT+p.p'-DDE+p,p'-TDE)	mg/kg	0.015	p.0,015		-	1	Eurofins	SFBA0-7	5.37	54.678734	18.342915	54.678813	18.346460	54.676754	18.348094	54.677199	18.343460
Stanisłw Selke	7	12	12_66_w2	168/18/1576	12_66	2018-06-22	2018-07-03	Deltametryna	mg/kg	0.015	p.0,015		-	1	Eurofins	SFBA0-7	5.37	54.678734	18.342915	54.678813	18.346460	54.676754	18.348094	54.677199	18.343460
Stanisłw Selke	7	12	12_66_w2	168/18/1576	12_66	2018-06-22	2018-07-03	Dialifos	mg/kg	0.03	p.0,03		-	1	Eurofins	SFBA0-7	5.37	54.678734	18.342915	54.678813	18.346460	54.676754	18.348094	54.677199	18.343460
Stanisłw Selke	7	12	12_66_w2	168/18/1576	12_66	2018-06-22	2018-07-03	Di-allate	mg/kg	0.03	p.0,03		-	1	Eurofins	SFBA0-7	5.37	54.678734	18.342915	54.678813	18.346460	54.676754	18.348094	54.677199	18.343460
Stanisłw Selke	7	12	12_66_w2	168/18/1576	12_66	2018-06-22	2018-07-03	Diazynon	mg/kg	0.03	p.0,03		-	1	Eurofins	SFBA0-7	5.37	54.678734	18.342915	54.678813	18.346460	54.676754	18.348094	54.677199	18.343460
Stanisłw Selke	7	12	12_66_w2	168/18/1576	12_66	2018-06-22	2018-07-03	4,4-Dibromobenzophenone	mg/kg	0.03	p.0,03		-	1	Eurofins	SFBA0-7	5.37	54.678734	18.342915	54.678813	18.346460	54.676754	18.348094	54.677199	18.343460
Stanisłw Selke	7	12	12_66_w2	168/18/1576	12_66	2018-06-22	2018-07-03	Dicapthon	mg/kg	0.03	p.0,03		-	1	Eurofins	SFBA0-7	5.37	54.678734	18.342915	54.678813	18.346460	54.676754	18.348094	54.677199	18.343460
Stanisłw Selke	7	12	12_66_w2	168/18/1576	12_66	2018-06-22	2018-07-03	Dichlobenil	mg/kg	0.15	p.0,15		-	1	Eurofins	SFBA0-7	5.37	54.678734	18.342915	54.678813	18.346460	54.676754	18.348094	54.677199	18.343460
Stanisłw Selke	7	12	12_66_w2	168/18/1576	12_66	2018-06-22	2018-07-03	Dichlofention	mg/kg	0.03	p.0,03		-	1	Eurofins	SFBA0-7	5.37	54.678734	18.342915	54.678813	18.346460	54.676754	18.348094	54.677199	18.343460
Stanisłw Selke	7	12	12_66_w2	168/18/1576	12_66	2018-06-22	2018-07-03	Dichlofluanid	mg/kg	0.015	p.0,015		-	1	Eurofins	SFBA0-7	5.37	54.678734	18.342915	54.678813	18.346460	54.676754	18.348094	54.677199	18.343460
Stanisłw Selke	7	12	12_66_w2	168/18/1576	12_66	2018-06-22	2018-07-03	Dichloran	mg/kg	0.075	p.0,075		-	1	Eurofins	SFBA0-7	5.37	54.678734	18.342915	54.678813	18.346460	54.676754	18.348094	54.677199	18.343460
Stanisłw Selke	7	12	12_66_w2	168/18/1576	12_66	2018-06-22	2018-07-03	Dichlorfos	mg/kg	0.06	p.0,06		-	1	Eurofins	SFBA0-7	5.37	54.678734	18.342915	54.678813	18.346460	54.676754	18.348094	54.677199	18.343460
Stanisłw Selke	7	12	12_66_w2	168/18/1576	12_66	2018-06-22	2018-07-03	Diclofop-methyl	mg/kg	0.015	p.0,015		-	1	Eurofins	SFBA0-7	5.37	54.678734	18.342915	54.678813	18.346460	54.676754	18.348094	54.677199	18.343460
Stanisłw Selke	7	12	12_66_w2	168/18/1576	12_66	2018-06-22	2018-07-03	Dikofol (suma)	mg/kg	0.015	p.0,015		-	1	Eurofins	SFBA0-7	5.37	54.678734	18.342915	54.678813	18.346460	54.676754	18.348094	54.677199	18.343460
Stanisłw Selke	7	12	12_66_w2	168/18/1576	12_66	2018-06-22	2018-07-03	Dicofol,o,p-	mg/kg	0.015	p.0,015		-	1	Eurofins	SFBA0-7	5.37	54.678734	18.342915	54.678813	18.346460	54.676754	18.348094	54.677199	18.343460
Stanisłw Selke	7	12	12_66_w2	168/18/1576	12_66	2018-06-22	2018-07-03	Dicofol,p,p--	mg/kg	0.015	p.0,015		-	1	Eurofins	SFBA0-7	5.37	54.678734	18.342915	54.678813	18.346460	54.676754	18.348094	54.677199	18.343460
Stanisłw Selke	7	12	12_66_w2	168/18/1576	12_66	2018-06-22	2018-07-03	Dicrotophos	mg/kg	0.03	p.0,03		-	1	Eurofins	SFBA0-7	5.37	54.678734	18.342915	54.678813	18.346460	54.676754	18.348094	54.677199	18.343460
Stanisłw Selke	7	12	12_66_w2	168/18/1576	12_66	2018-06-22	2018-07-03	Dieldryna	mg/kg	0.015	p.0,015		-	1	Eurofins	SFBA0-7	5.37	54.678734	18.342915	54.678813	18.346460	54.676754	18.348094	54.677199	18.343460
Stanisłw Selke	7	12	12_66_w2	168/18/1576	12_66	2018-06-22	2018-07-03	Dienochlor	mg/kg	0.03	p.0,03		-	1	Eurofins	SFBA0-7	5.37	54.678734	18.342915	54.678813	18.346460	54.676754	18.348094	54.677199	18.343460
Stanisłw Selke	7	12	12_66_w2	168/18/1576	12_66	2018-06-22	2018-07-03	Difenokonazol	mg/kg	0.045	p.0,045		-	1	Eurofins	SFBA0-7	5.37	54.678734	18.342915	54.678813	18.346460	54.676754	18.348094	54.677199	18.343460
Stanisłw Selke	7	12	12_66_w2	168/18/1576	12_66	2018-06-22	2018-07-03	Diflufenican	mg/kg	0.03	p.0,03		-	1	Eurofins	SFBA0-7	5.37	54.678734	18.342915	54.678813	18.346460	54.676754	18.348094	54.677199	18.343460
Stanisłw Selke	7	12	12_66_w2	168/18/1576	12_66	2018-06-22	2018-07-03	Dimefox	mg/kg	0.15	p.0,15		-	1	Eurofins	SFBA0-7	5.37	54.678734	18.342915	54.678813	18.346460	54.676754	18.348094	54.677199	18.343460
Stanisłw Selke	7	12	12_66_w2	168/18/1576	12_66	2018-06-22	2018-07-03	Dimetrachlor	mg/kg	0.03	p.0,03		-	1	Eurofins	SFBA0-7	5.37	54.678734	18.342915	54.678813	18.346460	54.676754	18.348094	54.677199	18.343460
Stanisłw Selke	7	12	12_66_w2	168/18/1576	12_66	2018-06-22	2018-07-03	Dimethipine	mg/kg	0.03	p.0,03		-	1	Eurofins	SFBA0-7	5.37	54.678734	18.342915	54.678813	18.346460	54.676754	18.348094	54.677199	18.343460
Stanisłw Selke	7	12	12_66_w2	168/18/1576	12_66	2018-06-22	2018-07-03	Dimetoat	mg/kg	0.06	p.0,06		-	1	Eurofins	SFBA0-7	5.37	54.678734	18.342915	54.678813	18.346460	54.676754	18.348094	54.677199	18.343460
Stanisłw Selke	7	12	12_66_w2	168/18/1576	12_66	2018-06-22	2018-07-03	Dimetomorf	mg/kg	0.03	p.0,03		-	1	Eurofins	SFBA0-7	5.37	54.678734	18.342915	54.678813	18.346460	54.676754	18.348094	54.677199	18.343460
Stanisłw Selke	7	12	12_66_w2	168/18/1576	12_66	2018-06-22	2018-07-03	Dinikonazol	mg/kg	0.03	p.0,03		-	1	Eurofins	SFBA0-7	5.37	54.678734	18.342915	54.678813	18.346460	54.676754	18.348094	54.677199	18.343460
Stanisłw Selke	7	12	12_66_w2	168/18/1576	12_66	2018-06-22	2018-07-03	Dinitramine	mg/kg	0.03	p.0,03		-	1	Eurofins	SFBA0-7	5.37	54.678734	18.342915	54.678813	18.346460	54.676754	18.348094	54.677199	18.343460
Stanisłw Selke	7	12	12_66_w2	168/18/1576	12_66	2018-06-22	2018-07-03	Dinobuton	mg/kg	0.1	p.0.,1		-	1	Eurofins	SFBA0-7	5.37	54.678734	18.342915	54.678813	18.346460	54.676754	18.348094	54.677199	18.343460
Stanisłw Selke	7	12	12_66_w2	168/18/1576	12_66	2018-06-22	2018-07-03	Disulfoton	mg/kg	0.03	p.0,03		-	1	Eurofins	SFBA0-7	5.37	54.678734	18.342915	54.678813	18.346460	54.676754	18.348094	54.677199	18.343460
Stanisłw Selke	7	12	12_66_w2	168/18/1576	12_66	2018-06-22	2018-07-03	Disulfoton-sulfon	mg/kg	0.03	p.0,03		-	1	Eurofins	SFBA0-7	5.37	54.678734	18.342915	54.678813	18.346460	54.676754	18.348094	54.677199	18.343460
Stanisłw Selke	7	12	12_66_w2	168/18/1576	12_66	2018-06-22	2018-07-03	Ditalimfos	mg/kg	0.015	p.0,015		-	1	Eurofins	SFBA0-7	5.37	54.678734	18.342915	54.678813	18.346460	54.676754	18.348094	54.677199	18.343460
Stanisłw Selke	7	12	12_66_w2	168/18/1576	12_66	2018-06-22	2018-07-03	Edifenphos	mg/kg	0.03	p.0,03		-	1	Eurofins	SFBA0-7	5.37	54.678734	18.342915	54.678813	18.346460	54.676754	18.348094	54.677199	18.343460
Stanisłw Selke	7	12	12_66_w2	168/18/1576	12_66	2018-06-22	2018-07-03	Endosulfan (suma izomerów)	mg/kg	0.015	p.0,015		-	1	Eurofins	SFBA0-7	5.37	54.678734	18.342915	54.678813	18.346460	54.676754	18.348094	54.677199	18.343460
Stanisłw Selke	7	12	12_66_w2	168/18/1576	12_66	2018-06-22	2018-07-03	alfa-Endosulfan	mg/kg	0.015	p.0,015		-	1	Eurofins	SFBA0-7	5.37	54.678734	18.342915	54.678813	18.346460	54.676754	18.348094	54.677199	18.343460
Stanisłw Selke	7	12	12_66_w2	168/18/1576	12_66	2018-06-22	2018-07-03	Siarczan endosulfanu	mg/kg	0.015	p.0,015		-	1	Eurofins	SFBA0-7	5.37	54.678734	18.342915	54.678813	18.346460	54.676754	18.348094	54.677199	18.343460
Stanisłw Selke	7	12	12_66_w2	168/18/1576	12_66	2018-06-22	2018-07-03	beta-Endosulfan	mg/kg	0.015	p.0,015		-	1	Eurofins	SFBA0-7	5.37	54.678734	18.342915	54.678813	18.346460	54.676754	18.348094	54.677199	18.343460
Stanisłw Selke	7	12	12_66_w2	168/18/1576	12_66	2018-06-22	2018-07-03	Endryna	mg/kg	0.015	p.0,015		-	1	Eurofins	SFBA0-7	5.37	54.678734	18.342915	54.678813	18.346460	54.676754	18.348094	54.677199	18.343460
Stanisłw Selke	7	12	12_66_w2	168/18/1576	12_66	2018-06-22	2018-07-03	Ketoendrin-delta	mg/kg	0.015	p.0,015		-	1	Eurofins	SFBA0-7	5.37	54.678734	18.342915	54.678813	18.346460	54.676754	18.348094	54.677199	18.343460
Stanisłw Selke	7	12	12_66_w2	168/18/1576	12_66	2018-06-22	2018-07-03	EPN	mg/kg	0.03	p.0,03		-	1	Eurofins	SFBA0-7	5.37	54.678734	18.342915	54.678813	18.346460	54.676754	18.348094	54.677199	18.343460
Stanisłw Selke	7	12	12_66_w2	168/18/1576	12_66	2018-06-22	2018-07-03	Epoksykonazol	mg/kg	0.12	p.0,12		-	1	Eurofins	SFBA0-7	5.37	54.678734	18.342915	54.678813	18.346460	54.676754	18.348094	54.677199	18.343460
Stanisłw Selke	7	12	12_66_w2	168/18/1576	12_66	2018-06-22	2018-07-03	Etaconazole	mg/kg	0.06	p.0,06		-	1	Eurofins	SFBA0-7	5.37	54.678734	18.342915	54.678813	18.346460	54.676754	18.348094	54.677199	18.343460
Stanisłw Selke	7	12	12_66_w2	168/18/1576	12_66	2018-06-22	2018-07-03	Ethalfluralin	mg/kg	0.03	p.0,03		-	1	Eurofins	SFBA0-7	5.37	54.678734	18.342915	54.678813	18.346460	54.676754	18.348094	54.677199	18.343460
Stanisłw Selke	7	12	12_66_w2	168/18/1576	12_66	2018-06-22	2018-07-03	Etion	mg/kg	0.015	p.0,015		-	1	Eurofins	SFBA0-7	5.37	54.678734	18.342915	54.678813	18.346460	54.676754	18.348094	54.677199	18.343460
Stanisłw Selke	7	12	12_66_w2	168/18/1576	12_66	2018-06-22	2018-07-03	Ethiprol	mg/kg	0.06	p.0,06		-	1	Eurofins	SFBA0-7	5.37	54.678734	18.342915	54.678813	18.346460	54.676754	18.348094	54.677199	18.343460
Stanisłw Selke	7	12	12_66_w2	168/18/1576	12_66	2018-06-22	2018-07-03	Etofumesat	mg/kg	0.15	p.0,15		-	1	Eurofins	SFBA0-7	5.37	54.678734	18.342915	54.678813	18.346460	54.676754	18.348094	54.677199	18.343460
Stanisłw Selke	7	12	12_66_w2	168/18/1576	12_66	2018-06-22	2018-07-03	Etoprofos	mg/kg	0.015	p.0,015		-	1	Eurofins	SFBA0-7	5.37	54.678734	18.342915	54.678813	18.346460	54.676754	18.348094	54.677199	18.343460
Stanisłw Selke	7	12	12_66_w2	168/18/1576	12_66	2018-06-22	2018-07-03	Etridiazole	mg/kg	0.015	p.0,015		-	1	Eurofins	SFBA0-7	5.37	54.678734	18.342915	54.678813	18.346460	54.676754	18.348094	54.677199	18.343460
Stanisłw Selke	7	12	12_66_w2	168/18/1576	12_66	2018-06-22	2018-07-03	Etrimfos	mg/kg	0.015	p.0,015		-	1	Eurofins	SFBA0-7	5.37	54.678734	18.342915	54.678813	18.346460	54.676754	18.348094	54.677199	18.343460
Stanisłw Selke	7	12	12_66_w2	168/18/1576	12_66	2018-06-22	2018-07-03	Famophos	mg/kg	0.03	p.0,03		-	1	Eurofins	SFBA0-7	5.37	54.678734	18.342915	54.678813	18.346460	54.676754	18.348094	54.677199	18.343460
Stanisłw Selke	7	12	12_66_w2	168/18/1576	12_66	2018-06-22	2018-07-03	Famoksadon	mg/kg	0.03	p.0,03		-	1	Eurofins	SFBA0-7	5.37	54.678734	18.342915	54.678813	18.346460	54.676754	18.348094	54.677199	18.343460
Stanisłw Selke	7	12	12_66_w2	168/18/1576	12_66	2018-06-22	2018-07-03	Fenamidon	mg/kg	0.06	p.0,06		-	1	Eurofins	SFBA0-7	5.37	54.678734	18.342915	54.678813	18.346460	54.676754	18.348094	54.677199	18.343460
Stanisłw Selke	7	12	12_66_w2	168/18/1576	12_66	2018-06-22	2018-07-03	Fenamifos (suma izomerów)	mg/kg	0.06	p.0,06		-	1	Eurofins	SFBA0-7	5.37	54.678734	18.342915	54.678813	18.346460	54.676754	18.348094	54.677199	18.343460
Stanisłw Selke	7	12	12_66_w2	168/18/1576	12_66	2018-06-22	2018-07-03	Fenarimol	mg/kg	0.15	p.0,15		-	1	Eurofins	SFBA0-7	5.37	54.678734	18.342915	54.678813	18.346460	54.676754	18.348094	54.677199	18.343460
Stanisłw Selke	7	12	12_66_w2	168/18/1576	12_66	2018-06-22	2018-07-03	Fenbukonazol	mg/kg	0.03	p.0,03		-	1	Eurofins	SFBA0-7	5.37	54.678734	18.342915	54.678813	18.346460	54.676754	18.348094	54.677199	18.343460
Stanisłw Selke	7	12	12_66_w2	168/18/1576	12_66	2018-06-22	2018-07-03	Fenchlorazole	mg/kg	0.03	p.0,03		-	1	Eurofins	SFBA0-7	5.37	54.678734	18.342915	54.678813	18.346460	54.676754	18.348094	54.677199	18.343460
Stanisłw Selke	7	12	12_66_w2	168/18/1576	12_66	2018-06-22	2018-07-03	Fenchlorofos	mg/kg	0.015	p.0,015		-	1	Eurofins	SFBA0-7	5.37	54.678734	18.342915	54.678813	18.346460	54.676754	18.348094	54.677199	18.343460
Stanisłw Selke	7	12	12_66_w2	168/18/1576	12_66	2018-06-22	2018-07-03	Fenfluthrine	mg/kg	0.03	p.0,03		-	1	Eurofins	SFBA0-7	5.37	54.678734	18.342915	54.678813	18.346460	54.676754	18.348094	54.677199	18.343460
Stanisłw Selke	7	12	12_66_w2	168/18/1576	12_66	2018-06-22	2018-07-03	Fenheksamid	mg/kg	0.15	p.0,15		-	1	Eurofins	SFBA0-7	5.37	54.678734	18.342915	54.678813	18.346460	54.676754	18.348094	54.677199	18.343460
Stanisłw Selke	7	12	12_66_w2	168/18/1576	12_66	2018-06-22	2018-07-03	Fenitrotion	mg/kg	0.015	p.0,015		-	1	Eurofins	SFBA0-7	5.37	54.678734	18.342915	54.678813	18.346460	54.676754	18.348094	54.677199	18.343460
Stanisłw Selke	7	12	12_66_w2	168/18/1576	12_66	2018-06-22	2018-07-03	Fenoxaprop-ethyl	mg/kg	0.15	p.0,15		-	1	Eurofins	SFBA0-7	5.37	54.678734	18.342915	54.678813	18.346460	54.676754	18.348094	54.677199	18.343460
Stanisłw Selke	7	12	12_66_w2	168/18/1576	12_66	2018-06-22	2018-07-03	Fenpiclonil	mg/kg	0.15	p.0,15		-	1	Eurofins	SFBA0-7	5.37	54.678734	18.342915	54.678813	18.346460	54.676754	18.348094	54.677199	18.343460
Stanisłw Selke	7	12	12_66_w2	168/18/1576	12_66	2018-06-22	2018-07-03	Fenpropatryna	mg/kg	0.015	p.0,015		-	1	Eurofins	SFBA0-7	5.37	54.678734	18.342915	54.678813	18.346460	54.676754	18.348094	54.677199	18.343460
Stanisłw Selke	7	12	12_66_w2	168/18/1576	12_66	2018-06-22	2018-07-03	Fenpropimorf	mg/kg	0.15	p.0,15		-	1	Eurofins	SFBA0-7	5.37	54.678734	18.342915	54.678813	18.346460	54.676754	18.348094	54.677199	18.343460
Stanisłw Selke	7	12	12_66_w2	168/18/1576	12_66	2018-06-22	2018-07-03	Fenson	mg/kg	0.03	p.0,03		-	1	Eurofins	SFBA0-7	5.37	54.678734	18.342915	54.678813	18.346460	54.676754	18.348094	54.677199	18.343460
Stanisłw Selke	7	12	12_66_w2	168/18/1576	12_66	2018-06-22	2018-07-03	Fensulfotion	mg/kg	0.03	p.0,03		-	1	Eurofins	SFBA0-7	5.37	54.678734	18.342915	54.678813	18.346460	54.676754	18.348094	54.677199	18.343460
Stanisłw Selke	7	12	12_66_w2	168/18/1576	12_66	2018-06-22	2018-07-03	Fewalerat (suma izomer ów)	mg/kg	0.015	p.0,015		-	1	Eurofins	SFBA0-7	5.37	54.678734	18.342915	54.678813	18.346460	54.676754	18.348094	54.677199	18.343460
Stanisłw Selke	7	12	12_66_w2	168/18/1576	12_66	2018-06-22	2018-07-03	Fenwalerat	mg/kg	0.015	p.0,015		-	1	Eurofins	SFBA0-7	5.37	54.678734	18.342915	54.678813	18.346460	54.676754	18.348094	54.677199	18.343460
Stanisłw Selke	7	12	12_66_w2	168/18/1576	12_66	2018-06-22	2018-07-03	Fenvalerate(RS-/SR-Izomer)	mg/kg	0.015	p.0,015		-	1	Eurofins	SFBA0-7	5.37	54.678734	18.342915	54.678813	18.346460	54.676754	18.348094	54.677199	18.343460
Stanisłw Selke	7	12	12_66_w2	168/18/1576	12_66	2018-06-22	2018-07-03	Fipronil	mg/kg	0.012	p.0,012		-	1	Eurofins	SFBA0-7	5.37	54.678734	18.342915	54.678813	18.346460	54.676754	18.348094	54.677199	18.343460
Stanisłw Selke	7	12	12_66_w2	168/18/1576	12_66	2018-06-22	2018-07-03	Fipronil,desulfinyl-	mg/kg	0.012	p.0,012		-	1	Eurofins	SFBA0-7	5.37	54.678734	18.342915	54.678813	18.346460	54.676754	18.348094	54.677199	18.343460
Stanisłw Selke	7	12	12_66_w2	168/18/1576	12_66	2018-06-22	2018-07-03	Fipranil+Sulfonmetab.MB46136(suma)	mg/kg	0.015	p.0,015		-	1	Eurofins	SFBA0-7	5.37	54.678734	18.342915	54.678813	18.346460	54.676754	18.348094	54.677199	18.343460
Stanisłw Selke	7	12	12_66_w2	168/18/1576	12_66	2018-06-22	2018-07-03	Fipronil sulfid	mg/kg	0.015	p.0,015		-	1	Eurofins	SFBA0-7	5.37	54.678734	18.342915	54.678813	18.346460	54.676754	18.348094	54.677199	18.343460
Stanisłw Selke	7	12	12_66_w2	168/18/1576	12_66	2018-06-22	2018-07-03	Fipronil sulfon	mg/kg	0.015	p.0,015		-	1	Eurofins	SFBA0-7	5.37	54.678734	18.342915	54.678813	18.346460	54.676754	18.348094	54.677199	18.343460
Stanisłw Selke	7	12	12_66_w2	168/18/1576	12_66	2018-06-22	2018-07-03	Flamprop-isopropyl	mg/kg	0.03	p.0,03		-	1	Eurofins	SFBA0-7	5.37	54.678734	18.342915	54.678813	18.346460	54.676754	18.348094	54.677199	18.343460
Stanisłw Selke	7	12	12_66_w2	168/18/1576	12_66	2018-06-22	2018-07-03	Flamprop-methyl	mg/kg	0.03	p.0,03		-	1	Eurofins	SFBA0-7	5.37	54.678734	18.342915	54.678813	18.346460	54.676754	18.348094	54.677199	18.343460
Stanisłw Selke	7	12	12_66_w2	168/18/1576	12_66	2018-06-22	2018-07-03	Flonikamid	mg/kg	0.15	p.0,15		-	1	Eurofins	SFBA0-7	5.37	54.678734	18.342915	54.678813	18.346460	54.676754	18.348094	54.677199	18.343460
Stanisłw Selke	7	12	12_66_w2	168/18/1576	12_66	2018-06-22	2018-07-03	Fluazifop-butyl	mg/kg	0.15	p.0,15		-	1	Eurofins	SFBA0-7	5.37	54.678734	18.342915	54.678813	18.346460	54.676754	18.348094	54.677199	18.343460
Stanisłw Selke	7	12	12_66_w2	168/18/1576	12_66	2018-06-22	2018-07-03	Fluazinam	mg/kg	0.03	p.0,03		-	1	Eurofins	SFBA0-7	5.37	54.678734	18.342915	54.678813	18.346460	54.676754	18.348094	54.677199	18.343460
Stanisłw Selke	7	12	12_66_w2	168/18/1576	12_66	2018-06-22	2018-07-03	Fluchloralina	mg/kg	0.015	p.0,015		-	1	Eurofins	SFBA0-7	5.37	54.678734	18.342915	54.678813	18.346460	54.676754	18.348094	54.677199	18.343460
Stanisłw Selke	7	12	12_66_w2	168/18/1576	12_66	2018-06-22	2018-07-03	Flucytrynat	mg/kg	0.03	p.0,03		-	1	Eurofins	SFBA0-7	5.37	54.678734	18.342915	54.678813	18.346460	54.676754	18.348094	54.677199	18.343460
Stanisłw Selke	7	12	12_66_w2	168/18/1576	12_66	2018-06-22	2018-07-03	Flufenoksuron	mg/kg	0.03	p.0,03		-	1	Eurofins	SFBA0-7	5.37	54.678734	18.342915	54.678813	18.346460	54.676754	18.348094	54.677199	18.343460
Stanisłw Selke	7	12	12_66_w2	168/18/1576	12_66	2018-06-22	2018-07-03	Flumethrine	mg/kg	0.03	p.0,03		-	1	Eurofins	SFBA0-7	5.37	54.678734	18.342915	54.678813	18.346460	54.676754	18.348094	54.677199	18.343460
Stanisłw Selke	7	12	12_66_w2	168/18/1576	12_66	2018-06-22	2018-07-03	Flumetralin	mg/kg	0.015	p.0,015		-	1	Eurofins	SFBA0-7	5.37	54.678734	18.342915	54.678813	18.346460	54.676754	18.348094	54.677199	18.343460
Stanisłw Selke	7	12	12_66_w2	168/18/1576	12_66	2018-06-22	2018-07-03	Flupikolid	mg/kg	0.03	p.0,03		-	1	Eurofins	SFBA0-7	5.37	54.678734	18.342915	54.678813	18.346460	54.676754	18.348094	54.677199	18.343460
Stanisłw Selke	7	12	12_66_w2	168/18/1576	12_66	2018-06-22	2018-07-03	Fluorodifen	mg/kg	0.015	p.0,015		-	1	Eurofins	SFBA0-7	5.37	54.678734	18.342915	54.678813	18.346460	54.676754	18.348094	54.677199	18.343460
Stanisłw Selke	7	12	12_66_w2	168/18/1576	12_66	2018-06-22	2018-07-03	Fluotrimazole	mg/kg	0.1	p.0,1		-	1	Eurofins	SFBA0-7	5.37	54.678734	18.342915	54.678813	18.346460	54.676754	18.348094	54.677199	18.343460
Stanisłw Selke	7	12	12_66_w2	168/18/1576	12_66	2018-06-22	2018-07-03	Fluchinkonazol	mg/kg	0.03	p.0,03		-	1	Eurofins	SFBA0-7	5.37	54.678734	18.342915	54.678813	18.346460	54.676754	18.348094	54.677199	18.343460
Stanisłw Selke	7	12	12_66_w2	168/18/1576	12_66	2018-06-22	2018-07-03	Flurenol-butyl	mg/kg	0.06	p.0,06		-	1	Eurofins	SFBA0-7	5.37	54.678734	18.342915	54.678813	18.346460	54.676754	18.348094	54.677199	18.343460
Stanisłw Selke	7	12	12_66_w2	168/18/1576	12_66	2018-06-22	2018-07-03	Flurochloridon	mg/kg	0.03	p.0,03		-	1	Eurofins	SFBA0-7	5.37	54.678734	18.342915	54.678813	18.346460	54.676754	18.348094	54.677199	18.343460
Stanisłw Selke	7	12	12_66_w2	168/18/1576	12_66	2018-06-22	2018-07-03	Flurtamone	mg/kg	0.03	p.0,03		-	1	Eurofins	SFBA0-7	5.37	54.678734	18.342915	54.678813	18.346460	54.676754	18.348094	54.677199	18.343460
Stanisłw Selke	7	12	12_66_w2	168/18/1576	12_66	2018-06-22	2018-07-03	Flusilazol	mg/kg	0.075	p.0,075		-	1	Eurofins	SFBA0-7	5.37	54.678734	18.342915	54.678813	18.346460	54.676754	18.348094	54.677199	18.343460
Stanisłw Selke	7	12	12_66_w2	168/18/1576	12_66	2018-06-22	2018-07-03	Folpet	mg/kg	0.03	p.0,03		-	1	Eurofins	SFBA0-7	5.37	54.678734	18.342915	54.678813	18.346460	54.676754	18.348094	54.677199	18.343460
Stanisłw Selke	7	12	12_66_w2	168/18/1576	12_66	2018-06-22	2018-07-03	Fonofos	mg/kg	0.015	p.0,015		-	1	Eurofins	SFBA0-7	5.37	54.678734	18.342915	54.678813	18.346460	54.676754	18.348094	54.677199	18.343460
Stanisłw Selke	7	12	12_66_w2	168/18/1576	12_66	2018-06-22	2018-07-03	Formotion	mg/kg	0.03	p.0,03		-	1	Eurofins	SFBA0-7	5.37	54.678734	18.342915	54.678813	18.346460	54.676754	18.348094	54.677199	18.343460
Stanisłw Selke	7	12	12_66_w2	168/18/1576	12_66	2018-06-22	2018-07-03	Genite	mg/kg	0.03	p.0,03		-	1	Eurofins	SFBA0-7	5.37	54.678734	18.342915	54.678813	18.346460	54.676754	18.348094	54.677199	18.343460
Stanisłw Selke	7	12	12_66_w2	168/18/1576	12_66	2018-06-22	2018-07-03	Halfenprox	mg/kg	0.03	p.0,03		-	1	Eurofins	SFBA0-7	5.37	54.678734	18.342915	54.678813	18.346460	54.676754	18.348094	54.677199	18.343460
Stanisłw Selke	7	12	12_66_w2	168/18/1576	12_66	2018-06-22	2018-07-03	Haloxyfop-Ethoxyethyl	mg/kg	0.03	p.0,03		-	1	Eurofins	SFBA0-7	5.37	54.678734	18.342915	54.678813	18.346460	54.676754	18.348094	54.677199	18.343460
Stanisłw Selke	7	12	12_66_w2	168/18/1576	12_66	2018-06-22	2018-07-03	Haloxyfop-methyl	mg/kg	0.15	p.0,15		-	1	Eurofins	SFBA0-7	5.37	54.678734	18.342915	54.678813	18.346460	54.676754	18.348094	54.677199	18.343460
Stanisłw Selke	7	12	12_66_w2	168/18/1576	12_66	2018-06-22	2018-07-03	HCH (sumaizomerów-bez lindan)	mg/kg	0.015	p.0,015		-	1	Eurofins	SFBA0-7	5.37	54.678734	18.342915	54.678813	18.346460	54.676754	18.348094	54.677199	18.343460
Stanisłw Selke	7	12	12_66_w2	168/18/1576	12_66	2018-06-22	2018-07-03	Alfa-HCH	mg/kg	0.015	p.0,015		-	1	Eurofins	SFBA0-7	5.37	54.678734	18.342915	54.678813	18.346460	54.676754	18.348094	54.677199	18.343460
Stanisłw Selke	7	12	12_66_w2	168/18/1576	12_66	2018-06-22	2018-07-03	Beta-HCH	mg/kg	0.015	p.0,015		-	1	Eurofins	SFBA0-7	5.37	54.678734	18.342915	54.678813	18.346460	54.676754	18.348094	54.677199	18.343460
Stanisłw Selke	7	12	12_66_w2	168/18/1576	12_66	2018-06-22	2018-07-03	Delta-HCH	mg/kg	0.015	p.0,015		-	1	Eurofins	SFBA0-7	5.37	54.678734	18.342915	54.678813	18.346460	54.676754	18.348094	54.677199	18.343460
Stanisłw Selke	7	12	12_66_w2	168/18/1576	12_66	2018-06-22	2018-07-03	Epsilon-HCH	mg/kg	0.015	p.0,015		-	1	Eurofins	SFBA0-7	5.37	54.678734	18.342915	54.678813	18.346460	54.676754	18.348094	54.677199	18.343460
Stanisłw Selke	7	12	12_66_w2	168/18/1576	12_66	2018-06-22	2018-07-03	Lindan(gamma-HCH)	mg/kg	0.015	p.0,015		-	1	Eurofins	SFBA0-7	5.37	54.678734	18.342915	54.678813	18.346460	54.676754	18.348094	54.677199	18.343460
Stanisłw Selke	7	12	12_66_w2	168/18/1576	12_66	2018-06-22	2018-07-03	Heptachlor	mg/kg	0.015	p.0,015		-	1	Eurofins	SFBA0-7	5.37	54.678734	18.342915	54.678813	18.346460	54.676754	18.348094	54.677199	18.343460
Stanisłw Selke	7	12	12_66_w2	168/18/1576	12_66	2018-06-22	2018-07-03	Heptachlor(suma)	mg/kg	0.015	p.0,015		-	1	Eurofins	SFBA0-7	5.37	54.678734	18.342915	54.678813	18.346460	54.676754	18.348094	54.677199	18.343460
Stanisłw Selke	7	12	12_66_w2	168/18/1576	12_66	2018-06-22	2018-07-03	Heptahlor-trans-epoksyd	mg/kg	0.015	p.0,015		-	1	Eurofins	SFBA0-7	5.37	54.678734	18.342915	54.678813	18.346460	54.676754	18.348094	54.677199	18.343460
Stanisłw Selke	7	12	12_66_w2	168/18/1576	12_66	2018-06-22	2018-07-03	Heptahlor-cis-epoksyd	mg/kg	0.015	p.0,015		-	1	Eurofins	SFBA0-7	5.37	54.678734	18.342915	54.678813	18.346460	54.676754	18.348094	54.677199	18.343460
Stanisłw Selke	7	12	12_66_w2	168/18/1576	12_66	2018-06-22	2018-07-03	Heptenofos	mg/kg	0.03	p.0,03		-	1	Eurofins	SFBA0-7	5.37	54.678734	18.342915	54.678813	18.346460	54.676754	18.348094	54.677199	18.343460
Stanisłw Selke	7	12	12_66_w2	168/18/1576	12_66	2018-06-22	2018-07-03	Heksachlorobenzen(HCB)	mg/kg	0.015	p.0,015		-	1	Eurofins	SFBA0-7	5.37	54.678734	18.342915	54.678813	18.346460	54.676754	18.348094	54.677199	18.343460
Stanisłw Selke	7	12	12_66_w2	168/18/1576	12_66	2018-06-22	2018-07-03	Heksakonazol	mg/kg	0.045	p.0,045		-	1	Eurofins	SFBA0-7	5.37	54.678734	18.342915	54.678813	18.346460	54.676754	18.348094	54.677199	18.343460
Stanisłw Selke	7	12	12_66_w2	168/18/1576	12_66	2018-06-22	2018-07-03	Indanofan	mg/kg	0.06	p.0,06		-	1	Eurofins	SFBA0-7	5.37	54.678734	18.342915	54.678813	18.346460	54.676754	18.348094	54.677199	18.343460
Stanisłw Selke	7	12	12_66_w2	168/18/1576	12_66	2018-06-22	2018-07-03	Indoksakarb	mg/kg	0.015	p.0,015		-	1	Eurofins	SFBA0-7	5.37	54.678734	18.342915	54.678813	18.346460	54.676754	18.348094	54.677199	18.343460
Stanisłw Selke	7	12	12_66_w2	168/18/1576	12_66	2018-06-22	2018-07-03	Jodofenfos	mg/kg	0.015	p.0,015		-	1	Eurofins	SFBA0-7	5.37	54.678734	18.342915	54.678813	18.346460	54.676754	18.348094	54.677199	18.343460
Stanisłw Selke	7	12	12_66_w2	168/18/1576	12_66	2018-06-22	2018-07-03	Ioxynil-Octanoate	mg/kg	0.03	p.0,03		-	1	Eurofins	SFBA0-7	5.37	54.678734	18.342915	54.678813	18.346460	54.676754	18.348094	54.677199	18.343460
Stanisłw Selke	7	12	12_66_w2	168/18/1576	12_66	2018-06-22	2018-07-03	Iprobenfos	mg/kg	0.03	p.0,03		-	1	Eurofins	SFBA0-7	5.37	54.678734	18.342915	54.678813	18.346460	54.676754	18.348094	54.677199	18.343460
Stanisłw Selke	7	12	12_66_w2	168/18/1576	12_66	2018-06-22	2018-07-03	Iprodion	mg/kg	0.03	p.0,03		-	1	Eurofins	SFBA0-7	5.37	54.678734	18.342915	54.678813	18.346460	54.676754	18.348094	54.677199	18.343460
Stanisłw Selke	7	12	12_66_w2	168/18/1576	12_66	2018-06-22	2018-07-03	Isazophos	mg/kg	0.03	p.0,03		-	1	Eurofins	SFBA0-7	5.37	54.678734	18.342915	54.678813	18.346460	54.676754	18.348094	54.677199	18.343460
Stanisłw Selke	7	12	12_66_w2	168/18/1576	12_66	2018-06-22	2018-07-03	Isobenzan	mg/kg	0.015	p.0,015		-	1	Eurofins	SFBA0-7	5.37	54.678734	18.342915	54.678813	18.346460	54.676754	18.348094	54.677199	18.343460
Stanisłw Selke	7	12	12_66_w2	168/18/1576	12_66	2018-06-22	2018-07-03	Isocarbofos	mg/kg	0.03	p.0,03		-	1	Eurofins	SFBA0-7	5.37	54.678734	18.342915	54.678813	18.346460	54.676754	18.348094	54.677199	18.343460
Stanisłw Selke	7	12	12_66_w2	168/18/1576	12_66	2018-06-22	2018-07-03	Izodryna	mg/kg	0.015	p.0,015		-	1	Eurofins	SFBA0-7	5.37	54.678734	18.342915	54.678813	18.346460	54.676754	18.348094	54.677199	18.343460
Stanisłw Selke	7	12	12_66_w2	168/18/1576	12_66	2018-06-22	2018-07-03	Izofenfos	mg/kg	0.015	p.0,015		-	1	Eurofins	SFBA0-7	5.37	54.678734	18.342915	54.678813	18.346460	54.676754	18.348094	54.677199	18.343460
Stanisłw Selke	7	12	12_66_w2	168/18/1576	12_66	2018-06-22	2018-07-03	Isofenphos-Methyl	mg/kg	0.015	p.0,015		-	1	Eurofins	SFBA0-7	5.37	54.678734	18.342915	54.678813	18.346460	54.676754	18.348094	54.677199	18.343460
Stanisłw Selke	7	12	12_66_w2	168/18/1576	12_66	2018-06-22	2018-07-03	Isomethiozin	mg/kg	0.03	p.0,03		-	1	Eurofins	SFBA0-7	5.37	54.678734	18.342915	54.678813	18.346460	54.676754	18.348094	54.677199	18.343460
Stanisłw Selke	7	12	12_66_w2	168/18/1576	12_66	2018-06-22	2018-07-03	Isopropalin	mg/kg	0.015	p.0,015		-	1	Eurofins	SFBA0-7	5.37	54.678734	18.342915	54.678813	18.346460	54.676754	18.348094	54.677199	18.343460
Stanisłw Selke	7	12	12_66_w2	168/18/1576	12_66	2018-06-22	2018-07-03	Isoxadifen-ethyl	mg/kg	0.03	p.0,03		-	1	Eurofins	SFBA0-7	5.37	54.678734	18.342915	54.678813	18.346460	54.676754	18.348094	54.677199	18.343460
Stanisłw Selke	7	12	12_66_w2	168/18/1576	12_66	2018-06-22	2018-07-03	Krezoksym-metylu	mg/kg	0.015	p.0,015		-	1	Eurofins	SFBA0-7	5.37	54.678734	18.342915	54.678813	18.346460	54.676754	18.348094	54.677199	18.343460
Stanisłw Selke	7	12	12_66_w2	168/18/1576	12_66	2018-06-22	2018-07-03	Lactofen	mg/kg	0.03	p.0,03		-	1	Eurofins	SFBA0-7	5.37	54.678734	18.342915	54.678813	18.346460	54.676754	18.348094	54.677199	18.343460
Stanisłw Selke	7	12	12_66_w2	168/18/1576	12_66	2018-06-22	2018-07-03	Leptophos	mg/kg	0.03	p.0,03		-	1	Eurofins	SFBA0-7	5.37	54.678734	18.342915	54.678813	18.346460	54.676754	18.348094	54.677199	18.343460
Stanisłw Selke	7	12	12_66_w2	168/18/1576	12_66	2018-06-22	2018-07-03	Lufenuron	mg/kg	0.036	p.0,03600		-	1	Eurofins	SFBA0-7	5.37	54.678734	18.342915	54.678813	18.346460	54.676754	18.348094	54.677199	18.343460
Stanisłw Selke	7	12	12_66_w2	168/18/1576	12_66	2018-06-22	2018-07-03	Malaokson	mg/kg	0.015	p.0,015		-	1	Eurofins	SFBA0-7	5.37	54.678734	18.342915	54.678813	18.346460	54.676754	18.348094	54.677199	18.343460
Stanisłw Selke	7	12	12_66_w2	168/18/1576	12_66	2018-06-22	2018-07-03	Malation	mg/kg	0.03	p.0,03		-	1	Eurofins	SFBA0-7	5.37	54.678734	18.342915	54.678813	18.346460	54.676754	18.348094	54.677199	18.343460
Stanisłw Selke	7	12	12_66_w2	168/18/1576	12_66	2018-06-22	2018-07-03	Mekarbam	mg/kg	0.03	p.0,03		-	1	Eurofins	SFBA0-7	5.37	54.678734	18.342915	54.678813	18.346460	54.676754	18.348094	54.677199	18.343460
Stanisłw Selke	7	12	12_66_w2	168/18/1576	12_66	2018-06-22	2018-07-03	Mephosfolan	mg/kg	0.03	p.0,03		-	1	Eurofins	SFBA0-7	5.37	54.678734	18.342915	54.678813	18.346460	54.676754	18.348094	54.677199	18.343460
Stanisłw Selke	7	12	12_66_w2	168/18/1576	12_66	2018-06-22	2018-07-03	Merphos	mg/kg	0.03	p.0,03		-	1	Eurofins	SFBA0-7	5.37	54.678734	18.342915	54.678813	18.346460	54.676754	18.348094	54.677199	18.343460
Stanisłw Selke	7	12	12_66_w2	168/18/1576	12_66	2018-06-22	2018-07-03	Metazachlor	mg/kg	0.03	p.0,03		-	1	Eurofins	SFBA0-7	5.37	54.678734	18.342915	54.678813	18.346460	54.676754	18.348094	54.677199	18.343460
Stanisłw Selke	7	12	12_66_w2	168/18/1576	12_66	2018-06-22	2018-07-03	Metakrifos	mg/kg	0.15	p.0,15		-	1	Eurofins	SFBA0-7	5.37	54.678734	18.342915	54.678813	18.346460	54.676754	18.348094	54.677199	18.343460
Stanisłw Selke	7	12	12_66_w2	168/18/1576	12_66	2018-06-22	2018-07-03	Metydation	mg/kg	0.036	p.0,03600		-	1	Eurofins	SFBA0-7	5.37	54.678734	18.342915	54.678813	18.346460	54.676754	18.348094	54.677199	18.343460
Stanisłw Selke	7	12	12_66_w2	168/18/1576	12_66	2018-06-22	2018-07-03	Metoksychlor	mg/kg	0.015	p.0,015		-	1	Eurofins	SFBA0-7	5.37	54.678734	18.342915	54.678813	18.346460	54.676754	18.348094	54.677199	18.343460
Stanisłw Selke	7	12	12_66_w2	168/18/1576	12_66	2018-06-22	2018-07-03	Metolachlor	mg/kg	0.15	p.0,15		-	1	Eurofins	SFBA0-7	5.37	54.678734	18.342915	54.678813	18.346460	54.676754	18.348094	54.677199	18.343460
Stanisłw Selke	7	12	12_66_w2	168/18/1576	12_66	2018-06-22	2018-07-03	Metrafenon	mg/kg	0.15	p.0,15		-	1	Eurofins	SFBA0-7	5.37	54.678734	18.342915	54.678813	18.346460	54.676754	18.348094	54.677199	18.343460
Stanisłw Selke	7	12	12_66_w2	168/18/1576	12_66	2018-06-22	2018-07-03	Metribuzyn	mg/kg	0.03	p.0,03		-	1	Eurofins	SFBA0-7	5.37	54.678734	18.342915	54.678813	18.346460	54.676754	18.348094	54.677199	18.343460
Stanisłw Selke	7	12	12_66_w2	168/18/1576	12_66	2018-06-22	2018-07-03	Mevinfos	mg/kg	0.03	p.0,03		-	1	Eurofins	SFBA0-7	5.37	54.678734	18.342915	54.678813	18.346460	54.676754	18.348094	54.677199	18.343460
Stanisłw Selke	7	12	12_66_w2	168/18/1576	12_66	2018-06-22	2018-07-03	Mirex	mg/kg	0.015	p.0,015		-	1	Eurofins	SFBA0-7	5.37	54.678734	18.342915	54.678813	18.346460	54.676754	18.348094	54.677199	18.343460
Stanisłw Selke	7	12	12_66_w2	168/18/1576	12_66	2018-06-22	2018-07-03	Molinate	mg/kg	0.045	p.0,045		-	1	Eurofins	SFBA0-7	5.37	54.678734	18.342915	54.678813	18.346460	54.676754	18.348094	54.677199	18.343460
Stanisłw Selke	7	12	12_66_w2	168/18/1576	12_66	2018-06-22	2018-07-03	Myklobutanil	mg/kg	0.015	p.0,015		-	1	Eurofins	SFBA0-7	5.37	54.678734	18.342915	54.678813	18.346460	54.676754	18.348094	54.677199	18.343460
Stanisłw Selke	7	12	12_66_w2	168/18/1576	12_66	2018-06-22	2018-07-03	Nitralin	mg/kg	0.03	p.0,03		-	1	Eurofins	SFBA0-7	5.37	54.678734	18.342915	54.678813	18.346460	54.676754	18.348094	54.677199	18.343460
Stanisłw Selke	7	12	12_66_w2	168/18/1576	12_66	2018-06-22	2018-07-03	Nitrapyrin	mg/kg	0.06	p.0,06		-	1	Eurofins	SFBA0-7	5.37	54.678734	18.342915	54.678813	18.346460	54.676754	18.348094	54.677199	18.343460
Stanisłw Selke	7	12	12_66_w2	168/18/1576	12_66	2018-06-22	2018-07-03	Nitrofen	mg/kg	0.03	p.0,03		-	1	Eurofins	SFBA0-7	5.37	54.678734	18.342915	54.678813	18.346460	54.676754	18.348094	54.677199	18.343460
Stanisłw Selke	7	12	12_66_w2	168/18/1576	12_66	2018-06-22	2018-07-03	Nitrothal-isopropyl	mg/kg	0.03	p.0,03		-	1	Eurofins	SFBA0-7	5.37	54.678734	18.342915	54.678813	18.346460	54.676754	18.348094	54.677199	18.343460
Stanisłw Selke	7	12	12_66_w2	168/18/1576	12_66	2018-06-22	2018-07-03	Norflurazon	mg/kg	0.15	p.0,15		-	1	Eurofins	SFBA0-7	5.37	54.678734	18.342915	54.678813	18.346460	54.676754	18.348094	54.677199	18.343460
Stanisłw Selke	7	12	12_66_w2	168/18/1576	12_66	2018-06-22	2018-07-03	Nuarimol	mg/kg	0.03	p.0,03		-	1	Eurofins	SFBA0-7	5.37	54.678734	18.342915	54.678813	18.346460	54.676754	18.348094	54.677199	18.343460
Stanisłw Selke	7	12	12_66_w2	168/18/1576	12_66	2018-06-22	2018-07-03	Ometoat	mg/kg	0.3	p.0,3		-	1	Eurofins	SFBA0-7	5.37	54.678734	18.342915	54.678813	18.346460	54.676754	18.348094	54.677199	18.343460
Stanisłw Selke	7	12	12_66_w2	168/18/1576	12_66	2018-06-22	2018-07-03	Oxadiazon	mg/kg	0.015	p.0,015		-	1	Eurofins	SFBA0-7	5.37	54.678734	18.342915	54.678813	18.346460	54.676754	18.348094	54.677199	18.343460
Stanisłw Selke	7	12	12_66_w2	168/18/1576	12_66	2018-06-22	2018-07-03	Oxydemeton-methyl	mg/kg	0.03	p.0,03		-	1	Eurofins	SFBA0-7	5.37	54.678734	18.342915	54.678813	18.346460	54.676754	18.348094	54.677199	18.343460
Stanisłw Selke	7	12	12_66_w2	168/18/1576	12_66	2018-06-22	2018-07-03	Oksyfluoroten	mg/kg	0.03	p.0,03		-	1	Eurofins	SFBA0-7	5.37	54.678734	18.342915	54.678813	18.346460	54.676754	18.348094	54.677199	18.343460
Stanisłw Selke	7	12	12_66_w2	168/18/1576	12_66	2018-06-22	2018-07-03	Paklobutrazol	mg/kg	0.12	p.0,12		-	1	Eurofins	SFBA0-7	5.37	54.678734	18.342915	54.678813	18.346460	54.676754	18.348094	54.677199	18.343460
Stanisłw Selke	7	12	12_66_w2	168/18/1576	12_66	2018-06-22	2018-07-03	Paraoxon-ethyl	mg/kg	0.045	p.0,045		-	1	Eurofins	SFBA0-7	5.37	54.678734	18.342915	54.678813	18.346460	54.676754	18.348094	54.677199	18.343460
Stanisłw Selke	7	12	12_66_w2	168/18/1576	12_66	2018-06-22	2018-07-03	Paraokson metylowy	mg/kg	0.045	p.0,045		-	1	Eurofins	SFBA0-7	5.37	54.678734	18.342915	54.678813	18.346460	54.676754	18.348094	54.677199	18.343460
Stanisłw Selke	7	12	12_66_w2	168/18/1576	12_66	2018-06-22	2018-07-03	Paration	mg/kg	0.015	p.0,015		-	1	Eurofins	SFBA0-7	5.37	54.678734	18.342915	54.678813	18.346460	54.676754	18.348094	54.677199	18.343460
Stanisłw Selke	7	12	12_66_w2	168/18/1576	12_66	2018-06-22	2018-07-03	Paration metylu	mg/kg	0.015	p.0,015		-	1	Eurofins	SFBA0-7	5.37	54.678734	18.342915	54.678813	18.346460	54.676754	18.348094	54.677199	18.343460
Stanisłw Selke	7	12	12_66_w2	168/18/1576	12_66	2018-06-22	2018-07-03	Paration metylu/Paraokson metylu (suma)	mg/kg	0.015	p.0,015		-	1	Eurofins	SFBA0-7	5.37	54.678734	18.342915	54.678813	18.346460	54.676754	18.348094	54.677199	18.343460
Stanisłw Selke	7	12	12_66_w2	168/18/1576	12_66	2018-06-22	2018-07-03	PCB IUPAC 101	mg/kg	0.015	p.0,015		-	1	Eurofins	SFBA0-7	5.37	54.678734	18.342915	54.678813	18.346460	54.676754	18.348094	54.677199	18.343460
Stanisłw Selke	7	12	12_66_w2	168/18/1576	12_66	2018-06-22	2018-07-03	PCB 118	mg/kg	0.015	p.0,015		-	1	Eurofins	SFBA0-7	5.37	54.678734	18.342915	54.678813	18.346460	54.676754	18.348094	54.677199	18.343460
Stanisłw Selke	7	12	12_66_w2	168/18/1576	12_66	2018-06-22	2018-07-03	PCB 138	mg/kg	0.015	p.0,015		-	1	Eurofins	SFBA0-7	5.37	54.678734	18.342915	54.678813	18.346460	54.676754	18.348094	54.677199	18.343460
Stanisłw Selke	7	12	12_66_w2	168/18/1576	12_66	2018-06-22	2018-07-03	PCB 153	mg/kg	0.015	p.0,015		-	1	Eurofins	SFBA0-7	5.37	54.678734	18.342915	54.678813	18.346460	54.676754	18.348094	54.677199	18.343460
Stanisłw Selke	7	12	12_66_w2	168/18/1576	12_66	2018-06-22	2018-07-03	PCB 180	mg/kg	0.015	p.0,015		-	1	Eurofins	SFBA0-7	5.37	54.678734	18.342915	54.678813	18.346460	54.676754	18.348094	54.677199	18.343460
Stanisłw Selke	7	12	12_66_w2	168/18/1576	12_66	2018-06-22	2018-07-03	PCB 28	mg/kg	0.015	p.0,015		-	1	Eurofins	SFBA0-7	5.37	54.678734	18.342915	54.678813	18.346460	54.676754	18.348094	54.677199	18.343460
Stanisłw Selke	7	12	12_66_w2	168/18/1576	12_66	2018-06-22	2018-07-03	PCB 52	mg/kg	0.015	p.0,015		-	1	Eurofins	SFBA0-7	5.37	54.678734	18.342915	54.678813	18.346460	54.676754	18.348094	54.677199	18.343460
Stanisłw Selke	7	12	12_66_w2	168/18/1576	12_66	2018-06-22	2018-07-03	Penkonazol	mg/kg	0.03	p.0,03		-	1	Eurofins	SFBA0-7	5.37	54.678734	18.342915	54.678813	18.346460	54.676754	18.348094	54.677199	18.343460
Stanisłw Selke	7	12	12_66_w2	168/18/1576	12_66	2018-06-22	2018-07-03	Pendimetalina	mg/kg	0.015	p.0,015		-	1	Eurofins	SFBA0-7	5.37	54.678734	18.342915	54.678813	18.346460	54.676754	18.348094	54.677199	18.343460
Stanisłw Selke	7	12	12_66_w2	168/18/1576	12_66	2018-06-22	2018-07-03	Pentachloranisol	mg/kg	0.015	p.0,015		-	1	Eurofins	SFBA0-7	5.37	54.678734	18.342915	54.678813	18.346460	54.676754	18.348094	54.677199	18.343460
Stanisłw Selke	7	12	12_66_w2	168/18/1576	12_66	2018-06-22	2018-07-03	Pentachloraniline	mg/kg	0.03	p.0,03		-	1	Eurofins	SFBA0-7	5.37	54.678734	18.342915	54.678813	18.346460	54.676754	18.348094	54.677199	18.343460
Stanisłw Selke	7	12	12_66_w2	168/18/1576	12_66	2018-06-22	2018-07-03	Pentachlorobenzen	mg/kg	0.015	p.0,015		-	1	Eurofins	SFBA0-7	5.37	54.678734	18.342915	54.678813	18.346460	54.676754	18.348094	54.677199	18.343460
Stanisłw Selke	7	12	12_66_w2	168/18/1576	12_66	2018-06-22	2018-07-03	Pentachlorothioanisole	mg/kg	0.03	p.0,03		-	1	Eurofins	SFBA0-7	5.37	54.678734	18.342915	54.678813	18.346460	54.676754	18.348094	54.677199	18.343460
Stanisłw Selke	7	12	12_66_w2	168/18/1576	12_66	2018-06-22	2018-07-03	Permetryna	mg/kg	0.06	p.0,06		-	1	Eurofins	SFBA0-7	5.37	54.678734	18.342915	54.678813	18.346460	54.676754	18.348094	54.677199	18.343460
Stanisłw Selke	7	12	12_66_w2	168/18/1576	12_66	2018-06-22	2018-07-03	Pertan	mg/kg	0.6	p.0,6		-	1	Eurofins	SFBA0-7	5.37	54.678734	18.342915	54.678813	18.346460	54.676754	18.348094	54.677199	18.343460
Stanisłw Selke	7	12	12_66_w2	168/18/1576	12_66	2018-06-22	2018-07-03	Phenkapton	mg/kg	0.03	p.0,03		-	1	Eurofins	SFBA0-7	5.37	54.678734	18.342915	54.678813	18.346460	54.676754	18.348094	54.677199	18.343460
Stanisłw Selke	7	12	12_66_w2	168/18/1576	12_66	2018-06-22	2018-07-03	Phenothrin	mg/kg	0.03	p.0,03		-	1	Eurofins	SFBA0-7	5.37	54.678734	18.342915	54.678813	18.346460	54.676754	18.348094	54.677199	18.343460
Stanisłw Selke	7	12	12_66_w2	168/18/1576	12_66	2018-06-22	2018-07-03	Fentoat	mg/kg	0.03	p.0,03		-	1	Eurofins	SFBA0-7	5.37	54.678734	18.342915	54.678813	18.346460	54.676754	18.348094	54.677199	18.343460
Stanisłw Selke	7	12	12_66_w2	168/18/1576	12_66	2018-06-22	2018-07-03	Fosalon	mg/kg	0.03	p.0,03		-	1	Eurofins	SFBA0-7	5.37	54.678734	18.342915	54.678813	18.346460	54.676754	18.348094	54.677199	18.343460
Stanisłw Selke	7	12	12_66_w2	168/18/1576	12_66	2018-06-22	2018-07-03	Phosfolane	mg/kg	0.03	p.0,03		-	1	Eurofins	SFBA0-7	5.37	54.678734	18.342915	54.678813	18.346460	54.676754	18.348094	54.677199	18.343460
Stanisłw Selke	7	12	12_66_w2	168/18/1576	12_66	2018-06-22	2018-07-03	Fosmet	mg/kg	0.03	p.0,03		-	1	Eurofins	SFBA0-7	5.37	54.678734	18.342915	54.678813	18.346460	54.676754	18.348094	54.677199	18.343460
Stanisłw Selke	7	12	12_66_w2	168/18/1576	12_66	2018-06-22	2018-07-03	Picolinafen	mg/kg	0.03	p.0,03		-	1	Eurofins	SFBA0-7	5.37	54.678734	18.342915	54.678813	18.346460	54.676754	18.348094	54.677199	18.343460
Stanisłw Selke	7	12	12_66_w2	168/18/1576	12_66	2018-06-22	2018-07-03	Pikoksystrobina	mg/kg	0.06	p.0,06		-	1	Eurofins	SFBA0-7	5.37	54.678734	18.342915	54.678813	18.346460	54.676754	18.348094	54.677199	18.343460
Stanisłw Selke	7	12	12_66_w2	168/18/1576	12_66	2018-06-22	2018-07-03	Piperophos	mg/kg	0.03	p.0,03		-	1	Eurofins	SFBA0-7	5.37	54.678734	18.342915	54.678813	18.346460	54.676754	18.348094	54.677199	18.343460
Stanisłw Selke	7	12	12_66_w2	168/18/1576	12_66	2018-06-22	2018-07-03	Pirymifos metylowy	mg/kg	0.03	p.0,03		-	1	Eurofins	SFBA0-7	5.37	54.678734	18.342915	54.678813	18.346460	54.676754	18.348094	54.677199	18.343460
Stanisłw Selke	7	12	12_66_w2	168/18/1576	12_66	2018-06-22	2018-07-03	Pirymifos etylu	mg/kg	0.03	p.0,03		-	1	Eurofins	SFBA0-7	5.37	54.678734	18.342915	54.678813	18.346460	54.676754	18.348094	54.677199	18.343460
Stanisłw Selke	7	12	12_66_w2	168/18/1576	12_66	2018-06-22	2018-07-03	Plifenate	mg/kg	0.03	p.0,03		-	1	Eurofins	SFBA0-7	5.37	54.678734	18.342915	54.678813	18.346460	54.676754	18.348094	54.677199	18.343460
Stanisłw Selke	7	12	12_66_w2	168/18/1576	12_66	2018-06-22	2018-07-03	Praletryna	mg/kg	0.03	p.0,03		-	1	Eurofins	SFBA0-7	5.37	54.678734	18.342915	54.678813	18.346460	54.676754	18.348094	54.677199	18.343460
Stanisłw Selke	7	12	12_66_w2	168/18/1576	12_66	2018-06-22	2018-07-03	Procymidon	mg/kg	0.045	p.0,045		-	1	Eurofins	SFBA0-7	5.37	54.678734	18.342915	54.678813	18.346460	54.676754	18.348094	54.677199	18.343460
Stanisłw Selke	7	12	12_66_w2	168/18/1576	12_66	2018-06-22	2018-07-03	Profenfos	mg/kg	0.015	p.0,015		-	1	Eurofins	SFBA0-7	5.37	54.678734	18.342915	54.678813	18.346460	54.676754	18.348094	54.677199	18.343460
Stanisłw Selke	7	12	12_66_w2	168/18/1576	12_66	2018-06-22	2018-07-03	Profluralina	mg/kg	0.015	p.0,015		-	1	Eurofins	SFBA0-7	5.37	54.678734	18.342915	54.678813	18.346460	54.676754	18.348094	54.677199	18.343460
Stanisłw Selke	7	12	12_66_w2	168/18/1576	12_66	2018-06-22	2018-07-03	Propachlor	mg/kg	0.03	p.0,03		-	1	Eurofins	SFBA0-7	5.37	54.678734	18.342915	54.678813	18.346460	54.676754	18.348094	54.677199	18.343460
Stanisłw Selke	7	12	12_66_w2	168/18/1576	12_66	2018-06-22	2018-07-03	Propanil	mg/kg	0.03	p.0,03		-	1	Eurofins	SFBA0-7	5.37	54.678734	18.342915	54.678813	18.346460	54.676754	18.348094	54.677199	18.343460
Stanisłw Selke	7	12	12_66_w2	168/18/1576	12_66	2018-06-22	2018-07-03	Propazyna	mg/kg	0.15	p.0,15		-	1	Eurofins	SFBA0-7	5.37	54.678734	18.342915	54.678813	18.346460	54.676754	18.348094	54.677199	18.343460
Stanisłw Selke	7	12	12_66_w2	168/18/1576	12_66	2018-06-22	2018-07-03	Propetamfos	mg/kg	0.015	p.0,015		-	1	Eurofins	SFBA0-7	5.37	54.678734	18.342915	54.678813	18.346460	54.676754	18.348094	54.677199	18.343460
Stanisłw Selke	7	12	12_66_w2	168/18/1576	12_66	2018-06-22	2018-07-03	Propikonazol	mg/kg	0.03	p.0,03		-	1	Eurofins	SFBA0-7	5.37	54.678734	18.342915	54.678813	18.346460	54.676754	18.348094	54.677199	18.343460
Stanisłw Selke	7	12	12_66_w2	168/18/1576	12_66	2018-06-22	2018-07-03	Propyzamid	mg/kg	0.03	p.0,03		-	1	Eurofins	SFBA0-7	5.37	54.678734	18.342915	54.678813	18.346460	54.676754	18.348094	54.677199	18.343460
Stanisłw Selke	7	12	12_66_w2	168/18/1576	12_66	2018-06-22	2018-07-03	Protiofos	mg/kg	0.015	p.0,015		-	1	Eurofins	SFBA0-7	5.37	54.678734	18.342915	54.678813	18.346460	54.676754	18.348094	54.677199	18.343460
Stanisłw Selke	7	12	12_66_w2	168/18/1576	12_66	2018-06-22	2018-07-03	Prothoat	mg/kg	0.03	p.0,03		-	1	Eurofins	SFBA0-7	5.37	54.678734	18.342915	54.678813	18.346460	54.676754	18.348094	54.677199	18.343460
Stanisłw Selke	7	12	12_66_w2	168/18/1576	12_66	2018-06-22	2018-07-03	Pyraclofos	mg/kg	0.03	p.0,03		-	1	Eurofins	SFBA0-7	5.37	54.678734	18.342915	54.678813	18.346460	54.676754	18.348094	54.677199	18.343460
Stanisłw Selke	7	12	12_66_w2	168/18/1576	12_66	2018-06-22	2018-07-03	Pyraflufen-ethyl	mg/kg	0.06	p.0,06		-	1	Eurofins	SFBA0-7	5.37	54.678734	18.342915	54.678813	18.346460	54.676754	18.348094	54.677199	18.343460
Stanisłw Selke	7	12	12_66_w2	168/18/1576	12_66	2018-06-22	2018-07-03	Pirazofos	mg/kg	0.03	p.0,03		-	1	Eurofins	SFBA0-7	5.37	54.678734	18.342915	54.678813	18.346460	54.676754	18.348094	54.677199	18.343460
Stanisłw Selke	7	12	12_66_w2	168/18/1576	12_66	2018-06-22	2018-07-03	Pyretryny	mg/kg	0.06	p.0,06		-	1	Eurofins	SFBA0-7	5.37	54.678734	18.342915	54.678813	18.346460	54.676754	18.348094	54.677199	18.343460
Stanisłw Selke	7	12	12_66_w2	168/18/1576	12_66	2018-06-22	2018-07-03	Pirydaben	mg/kg	0.015	p.0,015		-	1	Eurofins	SFBA0-7	5.37	54.678734	18.342915	54.678813	18.346460	54.676754	18.348094	54.677199	18.343460
Stanisłw Selke	7	12	12_66_w2	168/18/1576	12_66	2018-06-22	2018-07-03	Pyridaphenthion	mg/kg	0.03	p.0,03		-	1	Eurofins	SFBA0-7	5.37	54.678734	18.342915	54.678813	18.346460	54.676754	18.348094	54.677199	18.343460
Stanisłw Selke	7	12	12_66_w2	168/18/1576	12_66	2018-06-22	2018-07-03	Pyrifenox	mg/kg	0.03	p.0,03		-	1	Eurofins	SFBA0-7	5.37	54.678734	18.342915	54.678813	18.346460	54.676754	18.348094	54.677199	18.343460
Stanisłw Selke	7	12	12_66_w2	168/18/1576	12_66	2018-06-22	2018-07-03	Pirimithate	mg/kg	0.15	p.0,15		-	1	Eurofins	SFBA0-7	5.37	54.678734	18.342915	54.678813	18.346460	54.676754	18.348094	54.677199	18.343460
Stanisłw Selke	7	12	12_66_w2	168/18/1576	12_66	2018-06-22	2018-07-03	Chinalofos	mg/kg	0.015	p.0,015		-	1	Eurofins	SFBA0-7	5.37	54.678734	18.342915	54.678813	18.346460	54.676754	18.348094	54.677199	18.343460
Stanisłw Selke	7	12	12_66_w2	168/18/1576	12_66	2018-06-22	2018-07-03	Chinoksyfen	mg/kg	0.045	p.0,045		-	1	Eurofins	SFBA0-7	5.37	54.678734	18.342915	54.678813	18.346460	54.676754	18.348094	54.677199	18.343460
Stanisłw Selke	7	12	12_66_w2	168/18/1576	12_66	2018-06-22	2018-07-03	Kwintocen	mg/kg	0.015	p.0,015		-	1	Eurofins	SFBA0-7	5.37	54.678734	18.342915	54.678813	18.346460	54.676754	18.348094	54.677199	18.343460
Stanisłw Selke	7	12	12_66_w2	168/18/1576	12_66	2018-06-22	2018-07-03	Quintozene (suma)	mg/kg	0.015	p.0,015		-	1	Eurofins	SFBA0-7	5.37	54.678734	18.342915	54.678813	18.346460	54.676754	18.348094	54.677199	18.343460
Stanisłw Selke	7	12	12_66_w2	168/18/1576	12_66	2018-06-22	2018-07-03	Chizalofop etylowy	mg/kg	0.03	p.0,03		-	1	Eurofins	SFBA0-7	5.37	54.678734	18.342915	54.678813	18.346460	54.676754	18.348094	54.677199	18.343460
Stanisłw Selke	7	12	12_66_w2	168/18/1576	12_66	2018-06-22	2018-07-03	Resmetryna	mg/kg	0.3	p.0,3		-	1	Eurofins	SFBA0-7	5.37	54.678734	18.342915	54.678813	18.346460	54.676754	18.348094	54.677199	18.343460
Stanisłw Selke	7	12	12_66_w2	168/18/1576	12_66	2018-06-22	2018-07-03	S421 Octachlordipropyleter)	mg/kg	0.03	p.0,03		-	1	Eurofins	SFBA0-7	5.37	54.678734	18.342915	54.678813	18.346460	54.676754	18.348094	54.677199	18.343460
Stanisłw Selke	7	12	12_66_w2	168/18/1576	12_66	2018-06-22	2018-07-03	Spiromesifen	mg/kg	0.03	p.0,03		-	1	Eurofins	SFBA0-7	5.37	54.678734	18.342915	54.678813	18.346460	54.676754	18.348094	54.677199	18.343460
Stanisłw Selke	7	12	12_66_w2	168/18/1576	12_66	2018-06-22	2018-07-03	Sulfotep	mg/kg	0.03	p.0,03		-	1	Eurofins	SFBA0-7	5.37	54.678734	18.342915	54.678813	18.346460	54.676754	18.348094	54.677199	18.343460
Stanisłw Selke	7	12	12_66_w2	168/18/1576	12_66	2018-06-22	2018-07-03	Sulprofos	mg/kg	0.03	p.0,03		-	1	Eurofins	SFBA0-7	5.37	54.678734	18.342915	54.678813	18.346460	54.676754	18.348094	54.677199	18.343460
Stanisłw Selke	7	12	12_66_w2	168/18/1576	12_66	2018-06-22	2018-07-03	Swep	mg/kg	0.03	p.0,03		-	1	Eurofins	SFBA0-7	5.37	54.678734	18.342915	54.678813	18.346460	54.676754	18.348094	54.677199	18.343460
Stanisłw Selke	7	12	12_66_w2	168/18/1576	12_66	2018-06-22	2018-07-03	tau-Fluvalinate	mg/kg	0.015	p.0,015		-	1	Eurofins	SFBA0-7	5.37	54.678734	18.342915	54.678813	18.346460	54.676754	18.348094	54.677199	18.343460
Stanisłw Selke	7	12	12_66_w2	168/18/1576	12_66	2018-06-22	2018-07-03	Tebupirimfos	mg/kg	0.015	p.0,015		-	1	Eurofins	SFBA0-7	5.37	54.678734	18.342915	54.678813	18.346460	54.676754	18.348094	54.677199	18.343460
Stanisłw Selke	7	12	12_66_w2	168/18/1576	12_66	2018-06-22	2018-07-03	Technazen	mg/kg	0.015	p.0,015		-	1	Eurofins	SFBA0-7	5.37	54.678734	18.342915	54.678813	18.346460	54.676754	18.348094	54.677199	18.343460
Stanisłw Selke	7	12	12_66_w2	168/18/1576	12_66	2018-06-22	2018-07-03	Teflutryna	mg/kg	0.015	p.0,015		-	1	Eurofins	SFBA0-7	5.37	54.678734	18.342915	54.678813	18.346460	54.676754	18.348094	54.677199	18.343460
Stanisłw Selke	7	12	12_66_w2	168/18/1576	12_66	2018-06-22	2018-07-03	Temephos	mg/kg	0.03	p.0,03		-	1	Eurofins	SFBA0-7	5.37	54.678734	18.342915	54.678813	18.346460	54.676754	18.348094	54.677199	18.343460
Stanisłw Selke	7	12	12_66_w2	168/18/1576	12_66	2018-06-22	2018-07-03	Terbufos	mg/kg	0.015	p.0,015		-	1	Eurofins	SFBA0-7	5.37	54.678734	18.342915	54.678813	18.346460	54.676754	18.348094	54.677199	18.343460
Stanisłw Selke	7	12	12_66_w2	168/18/1576	12_66	2018-06-22	2018-07-03	Tetrachlorwinfos	mg/kg	0.015	p.0,015		-	1	Eurofins	SFBA0-7	5.37	54.678734	18.342915	54.678813	18.346460	54.676754	18.348094	54.677199	18.343460
Stanisłw Selke	7	12	12_66_w2	168/18/1576	12_66	2018-06-22	2018-07-03	Tetrakonazol	mg/kg	0.075	p.0,075		-	1	Eurofins	SFBA0-7	5.37	54.678734	18.342915	54.678813	18.346460	54.676754	18.348094	54.677199	18.343460
Stanisłw Selke	7	12	12_66_w2	168/18/1576	12_66	2018-06-22	2018-07-03	Tetradifon	mg/kg	0.015	p.0,015		-	1	Eurofins	SFBA0-7	5.37	54.678734	18.342915	54.678813	18.346460	54.676754	18.348094	54.677199	18.343460
Stanisłw Selke	7	12	12_66_w2	168/18/1576	12_66	2018-06-22	2018-07-03	Tetrametryna	mg/kg	0.03	p.0,03		-	1	Eurofins	SFBA0-7	5.37	54.678734	18.342915	54.678813	18.346460	54.676754	18.348094	54.677199	18.343460
Stanisłw Selke	7	12	12_66_w2	168/18/1576	12_66	2018-06-22	2018-07-03	Tetrasul	mg/kg	0.03	p.0,03		-	1	Eurofins	SFBA0-7	5.37	54.678734	18.342915	54.678813	18.346460	54.676754	18.348094	54.677199	18.343460
Stanisłw Selke	7	12	12_66_w2	168/18/1576	12_66	2018-06-22	2018-07-03	Tolklofos metylu	mg/kg	0.03	p.0,03		-	1	Eurofins	SFBA0-7	5.37	54.678734	18.342915	54.678813	18.346460	54.676754	18.348094	54.677199	18.343460
Stanisłw Selke	7	12	12_66_w2	168/18/1576	12_66	2018-06-22	2018-07-03	Tolilofluanid	mg/kg	0.03	p.0,03		-	1	Eurofins	SFBA0-7	5.37	54.678734	18.342915	54.678813	18.346460	54.676754	18.348094	54.677199	18.343460
Stanisłw Selke	7	12	12_66_w2	168/18/1576	12_66	2018-06-22	2018-07-03	Toxaphene Parlar 26	mg/kg	0.01	p.0,01		-	1	Eurofins	SFBA0-7	5.37	54.678734	18.342915	54.678813	18.346460	54.676754	18.348094	54.677199	18.343460
Stanisłw Selke	7	12	12_66_w2	168/18/1576	12_66	2018-06-22	2018-07-03	Toxaphene Parlar 50	mg/kg	0.01	p.0,01		-	1	Eurofins	SFBA0-7	5.37	54.678734	18.342915	54.678813	18.346460	54.676754	18.348094	54.677199	18.343460
Stanisłw Selke	7	12	12_66_w2	168/18/1576	12_66	2018-06-22	2018-07-03	Toxaphene Parlar 62	mg/kg	0.01	p.0,01		-	1	Eurofins	SFBA0-7	5.37	54.678734	18.342915	54.678813	18.346460	54.676754	18.348094	54.677199	18.343460
Stanisłw Selke	7	12	12_66_w2	168/18/1576	12_66	2018-06-22	2018-07-03	Transfluthrin	mg/kg	0.03	p.0,03		-	1	Eurofins	SFBA0-7	5.37	54.678734	18.342915	54.678813	18.346460	54.676754	18.348094	54.677199	18.343460
Stanisłw Selke	7	12	12_66_w2	168/18/1576	12_66	2018-06-22	2018-07-03	Triadimefon	mg/kg	0.03	p.0,03		-	1	Eurofins	SFBA0-7	5.37	54.678734	18.342915	54.678813	18.346460	54.676754	18.348094	54.677199	18.343460
Stanisłw Selke	7	12	12_66_w2	168/18/1576	12_66	2018-06-22	2018-07-03	Triadimenol	mg/kg	0.15	p.0,15		-	1	Eurofins	SFBA0-7	5.37	54.678734	18.342915	54.678813	18.346460	54.676754	18.348094	54.677199	18.343460
Stanisłw Selke	7	12	12_66_w2	168/18/1576	12_66	2018-06-22	2018-07-03	Triadimenol/Triadimefon(suma)	mg/kg	0.15	p.0,15		-	1	Eurofins	SFBA0-7	5.37	54.678734	18.342915	54.678813	18.346460	54.676754	18.348094	54.677199	18.343460
Stanisłw Selke	7	12	12_66_w2	168/18/1576	12_66	2018-06-22	2018-07-03	Trialat	mg/kg	0.03	p.0,03		-	1	Eurofins	SFBA0-7	5.37	54.678734	18.342915	54.678813	18.346460	54.676754	18.348094	54.677199	18.343460
Stanisłw Selke	7	12	12_66_w2	168/18/1576	12_66	2018-06-22	2018-07-03	Triamiphos	mg/kg	0.075	p.0,075		-	1	Eurofins	SFBA0-7	5.37	54.678734	18.342915	54.678813	18.346460	54.676754	18.348094	54.677199	18.343460
Stanisłw Selke	7	12	12_66_w2	168/18/1576	12_66	2018-06-22	2018-07-03	Triazofos	mg/kg	0.06	p.0,06		-	1	Eurofins	SFBA0-7	5.37	54.678734	18.342915	54.678813	18.346460	54.676754	18.348094	54.677199	18.343460
Stanisłw Selke	7	12	12_66_w2	168/18/1576	12_66	2018-06-22	2018-07-03	Tribufos	mg/kg	0.03	p.0,03		-	1	Eurofins	SFBA0-7	5.37	54.678734	18.342915	54.678813	18.346460	54.676754	18.348094	54.677199	18.343460
Stanisłw Selke	7	12	12_66_w2	168/18/1576	12_66	2018-06-22	2018-07-03	Trichloronat	mg/kg	0.015	p.0,015		-	1	Eurofins	SFBA0-7	5.37	54.678734	18.342915	54.678813	18.346460	54.676754	18.348094	54.677199	18.343460
Stanisłw Selke	7	12	12_66_w2	168/18/1576	12_66	2018-06-22	2018-07-03	Tridiphane	mg/kg	0.15	p.0,15		-	1	Eurofins	SFBA0-7	5.37	54.678734	18.342915	54.678813	18.346460	54.676754	18.348094	54.677199	18.343460
Stanisłw Selke	7	12	12_66_w2	168/18/1576	12_66	2018-06-22	2018-07-03	Trifloksystrobina	mg/kg	0.03	p.0,03		-	1	Eurofins	SFBA0-7	5.37	54.678734	18.342915	54.678813	18.346460	54.676754	18.348094	54.677199	18.343460
Stanisłw Selke	7	12	12_66_w2	168/18/1576	12_66	2018-06-22	2018-07-03	Trifluralina	mg/kg	0.015	p.0,015		-	1	Eurofins	SFBA0-7	5.37	54.678734	18.342915	54.678813	18.346460	54.676754	18.348094	54.677199	18.343460
Stanisłw Selke	7	12	12_66_w2	168/18/1576	12_66	2018-06-22	2018-07-03	Vamidothion	mg/kg	0.03	p.0,03		-	1	Eurofins	SFBA0-7	5.37	54.678734	18.342915	54.678813	18.346460	54.676754	18.348094	54.677199	18.343460
Stanisłw Selke	7	12	12_66_w2	168/18/1576	12_66	2018-06-22	2018-07-03	Winklozolina	mg/kg	0.015	p.0,015		-	1	Eurofins	SFBA0-7	5.37	54.678734	18.342915	54.678813	18.346460	54.676754	18.348094	54.677199	18.343460
Stanisłw Selke	7	12	12_66_w2	168/18/1576	12_66	2018-06-22	2018-07-03	Glifosat	mg/kg	0.05	p.0,05		-	1	Eurofins	SF130-4	5.37	54.678734	18.342915	54.678813	18.346460	54.676754	18.348094	54.677199	18.343460
Stanisłw Selke	7	12	12_66_w2	168/18/1576	12_66	2018-06-22	2018-07-03	Glufosynat	mg/kg	0.05	p.0,05		-	1	Eurofins	SF130-4	5.37	54.678734	18.342915	54.678813	18.346460	54.676754	18.348094	54.677199	18.343460
Stanisłw Selke	7	12	12_66_w2	168/18/1576	12_66	2018-06-22	2018-07-03	Kwas aminometylofosfonowy (AMPA)	mg/kg	0.05	0.2	±	0.1	0	Eurofins	SF130-4	5.37	54.678734	18.342915	54.678813	18.346460	54.676754	18.348094	54.677199	18.343460
Michał Korthals	8	19	19_44/2_w2	189/18/1684	19_44/2	2018-07-11	2018-07-30	2,4,5-T-Methylester	mg/kg	0.03	p.0,03		-	1	Eurofins	SFBA0-7	3.51	54.695007	18.422677	54.693555	18.426393	54.691556	18.425256	54.693084	18.419877
Michał Korthals	8	19	19_44/2_w2	189/18/1684	19_44/2	2018-07-11	2018-07-30	2,4-D-Methylester	mg/kg	0.03	p.0,03		-	1	Eurofins	SFBA0-7	3.51	54.695007	18.422677	54.693555	18.426393	54.691556	18.425256	54.693084	18.419877
Michał Korthals	8	19	19_44/2_w2	189/18/1684	19_44/2	2018-07-11	2018-07-30	Acetochlor	mg/kg	0.15	p.0,15		-	1	Eurofins	SFBA0-7	3.51	54.695007	18.422677	54.693555	18.426393	54.691556	18.425256	54.693084	18.419877
Michał Korthals	8	19	19_44/2_w2	189/18/1684	19_44/2	2018-07-11	2018-07-30	Aclonifen	mg/kg	0.06	p.0,06		-	1	Eurofins	SFBA0-7	3.51	54.695007	18.422677	54.693555	18.426393	54.691556	18.425256	54.693084	18.419877
Michał Korthals	8	19	19_44/2_w2	189/18/1684	19_44/2	2018-07-11	2018-07-30	Akrynatryna	mg/kg	0.03	p.0,03		-	1	Eurofins	SFBA0-7	3.51	54.695007	18.422677	54.693555	18.426393	54.691556	18.425256	54.693084	18.419877
Michał Korthals	8	19	19_44/2_w2	189/18/1684	19_44/2	2018-07-11	2018-07-30	Alachlor	mg/kg	0.03	p.0,03		-	1	Eurofins	SFBA0-7	3.51	54.695007	18.422677	54.693555	18.426393	54.691556	18.425256	54.693084	18.419877
Michał Korthals	8	19	19_44/2_w2	189/18/1684	19_44/2	2018-07-11	2018-07-30	Aldryna	mg/kg	0.015	p.0,015		-	1	Eurofins	SFBA0-7	3.51	54.695007	18.422677	54.693555	18.426393	54.691556	18.425256	54.693084	18.419877
Michał Korthals	8	19	19_44/2_w2	189/18/1684	19_44/2	2018-07-11	2018-07-30	Aldryna+Dieldryna	mg/kg	0.015	p.0,015		-	1	Eurofins	SFBA0-7	3.51	54.695007	18.422677	54.693555	18.426393	54.691556	18.425256	54.693084	18.419877
Michał Korthals	8	19	19_44/2_w2	189/18/1684	19_44/2	2018-07-11	2018-07-30	Alletryna	mg/kg	0.03	p.0,03		-	1	Eurofins	SFBA0-7	3.51	54.695007	18.422677	54.693555	18.426393	54.691556	18.425256	54.693084	18.419877
Michał Korthals	8	19	19_44/2_w2	189/18/1684	19_44/2	2018-07-11	2018-07-30	Amidithion	mg/kg	0.03	p.0,03		-	1	Eurofins	SFBA0-7	3.51	54.695007	18.422677	54.693555	18.426393	54.691556	18.425256	54.693084	18.419877
Michał Korthals	8	19	19_44/2_w2	189/18/1684	19_44/2	2018-07-11	2018-07-30	Antrachinon	mg/kg	0.06	0.23	±	0.12	0	Eurofins	SFBA0-7	3.51	54.695007	18.422677	54.693555	18.426393	54.691556	18.425256	54.693084	18.419877
Michał Korthals	8	19	19_44/2_w2	189/18/1684	19_44/2	2018-07-11	2018-07-30	Atrazyna	mg/kg	0.15	p.0,15		-	1	Eurofins	SFBA0-7	3.51	54.695007	18.422677	54.693555	18.426393	54.691556	18.425256	54.693084	18.419877
Michał Korthals	8	19	19_44/2_w2	189/18/1684	19_44/2	2018-07-11	2018-07-30	Azakonazol	mg/kg	0.03	p.0,03		-	1	Eurofins	SFBA0-7	3.51	54.695007	18.422677	54.693555	18.426393	54.691556	18.425256	54.693084	18.419877
Michał Korthals	8	19	19_44/2_w2	189/18/1684	19_44/2	2018-07-11	2018-07-30	Azynofos etylowy	mg/kg	0.03	p.0,03		-	1	Eurofins	SFBA0-7	3.51	54.695007	18.422677	54.693555	18.426393	54.691556	18.425256	54.693084	18.419877
Michał Korthals	8	19	19_44/2_w2	189/18/1684	19_44/2	2018-07-11	2018-07-30	Azynofos metylowy	mg/kg	0.03	p.0,03		-	1	Eurofins	SFBA0-7	3.51	54.695007	18.422677	54.693555	18.426393	54.691556	18.425256	54.693084	18.419877
Michał Korthals	8	19	19_44/2_w2	189/18/1684	19_44/2	2018-07-11	2018-07-30	Azoksystrobina	mg/kg	0.03	p.0,03		-	1	Eurofins	SFBA0-7	3.51	54.695007	18.422677	54.693555	18.426393	54.691556	18.425256	54.693084	18.419877
Michał Korthals	8	19	19_44/2_w2	189/18/1684	19_44/2	2018-07-11	2018-07-30	Benfluralin	mg/kg	0.015	p.0,015		-	1	Eurofins	SFBA0-7	3.51	54.695007	18.422677	54.693555	18.426393	54.691556	18.425256	54.693084	18.419877
Michał Korthals	8	19	19_44/2_w2	189/18/1684	19_44/2	2018-07-11	2018-07-30	Benoxacor	mg/kg	0.03	p.0,03		-	1	Eurofins	SFBA0-7	3.51	54.695007	18.422677	54.693555	18.426393	54.691556	18.425256	54.693084	18.419877
Michał Korthals	8	19	19_44/2_w2	189/18/1684	19_44/2	2018-07-11	2018-07-30	Benzoylprop-ethyl	mg/kg	0.15	p.0,15		-	1	Eurofins	SFBA0-7	3.51	54.695007	18.422677	54.693555	18.426393	54.691556	18.425256	54.693084	18.419877
Michał Korthals	8	19	19_44/2_w2	189/18/1684	19_44/2	2018-07-11	2018-07-30	Biofenox	mg/kg	0.03	p.0,03		-	1	Eurofins	SFBA0-7	3.51	54.695007	18.422677	54.693555	18.426393	54.691556	18.425256	54.693084	18.419877
Michał Korthals	8	19	19_44/2_w2	189/18/1684	19_44/2	2018-07-11	2018-07-30	Binapacryl	mg/kg	0.015	p.0,15		-	1	Eurofins	SFBA0-7	3.51	54.695007	18.422677	54.693555	18.426393	54.691556	18.425256	54.693084	18.419877
Michał Korthals	8	19	19_44/2_w2	189/18/1684	19_44/2	2018-07-11	2018-07-30	Bifentryna	mg/kg	0.06	p.0,06		-	1	Eurofins	SFBA0-7	3.51	54.695007	18.422677	54.693555	18.426393	54.691556	18.425256	54.693084	18.419877
Michał Korthals	8	19	19_44/2_w2	189/18/1684	19_44/2	2018-07-11	2018-07-30	Bitertanol	mg/kg	0.15	p.0,15		-	1	Eurofins	SFBA0-7	3.51	54.695007	18.422677	54.693555	18.426393	54.691556	18.425256	54.693084	18.419877
Michał Korthals	8	19	19_44/2_w2	189/18/1684	19_44/2	2018-07-11	2018-07-30	Boskalid	mg/kg	0.09	p.0,09		-	1	Eurofins	SFBA0-7	3.51	54.695007	18.422677	54.693555	18.426393	54.691556	18.425256	54.693084	18.419877
Michał Korthals	8	19	19_44/2_w2	189/18/1684	19_44/2	2018-07-11	2018-07-30	Bromofenvinphos	mg/kg	0.03	p.0,03		-	1	Eurofins	SFBA0-7	3.51	54.695007	18.422677	54.693555	18.426393	54.691556	18.425256	54.693084	18.419877
Michał Korthals	8	19	19_44/2_w2	189/18/1684	19_44/2	2018-07-11	2018-07-30	Bromocyclen	mg/kg	0.03	p.0,03		-	1	Eurofins	SFBA0-7	3.51	54.695007	18.422677	54.693555	18.426393	54.691556	18.425256	54.693084	18.419877
Michał Korthals	8	19	19_44/2_w2	189/18/1684	19_44/2	2018-07-11	2018-07-30	Bromofos metylowy	mg/kg	0.015	p.0,015		-	1	Eurofins	SFBA0-7	3.51	54.695007	18.422677	54.693555	18.426393	54.691556	18.425256	54.693084	18.419877
Michał Korthals	8	19	19_44/2_w2	189/18/1684	19_44/2	2018-07-11	2018-07-30	Bromofos etylowy	mg/kg	0.015	p.0,015		-	1	Eurofins	SFBA0-7	3.51	54.695007	18.422677	54.693555	18.426393	54.691556	18.425256	54.693084	18.419877
Michał Korthals	8	19	19_44/2_w2	189/18/1684	19_44/2	2018-07-11	2018-07-30	Bromopropylat	mg/kg	0.03	p.0,03		-	1	Eurofins	SFBA0-7	3.51	54.695007	18.422677	54.693555	18.426393	54.691556	18.425256	54.693084	18.419877
Michał Korthals	8	19	19_44/2_w2	189/18/1684	19_44/2	2018-07-11	2018-07-30	Buprofezyna	mg/kg	0.15	p.0,15		-	1	Eurofins	SFBA0-7	3.51	54.695007	18.422677	54.693555	18.426393	54.691556	18.425256	54.693084	18.419877
Michał Korthals	8	19	19_44/2_w2	189/18/1684	19_44/2	2018-07-11	2018-07-30	Butachlor	mg/kg	0.03	p.0,03		-	1	Eurofins	SFBA0-7	3.51	54.695007	18.422677	54.693555	18.426393	54.691556	18.425256	54.693084	18.419877
Michał Korthals	8	19	19_44/2_w2	189/18/1684	19_44/2	2018-07-11	2018-07-30	Butamifos	mg/kg	0.015	p.0,015		-	1	Eurofins	SFBA0-7	3.51	54.695007	18.422677	54.693555	18.426393	54.691556	18.425256	54.693084	18.419877
Michał Korthals	8	19	19_44/2_w2	189/18/1684	19_44/2	2018-07-11	2018-07-30	Butralin	mg/kg	0.03	p.0,03		-	1	Eurofins	SFBA0-7	3.51	54.695007	18.422677	54.693555	18.426393	54.691556	18.425256	54.693084	18.419877
Michał Korthals	8	19	19_44/2_w2	189/18/1684	19_44/2	2018-07-11	2018-07-30	Kadusafos	mg/kg	0.03	p.0,03		-	1	Eurofins	SFBA0-7	3.51	54.695007	18.422677	54.693555	18.426393	54.691556	18.425256	54.693084	18.419877
Michał Korthals	8	19	19_44/2_w2	189/18/1684	19_44/2	2018-07-11	2018-07-30	Kaptafol	mg/kg	0.03	p.0,03		-	1	Eurofins	SFBA0-7	3.51	54.695007	18.422677	54.693555	18.426393	54.691556	18.425256	54.693084	18.419877
Michał Korthals	8	19	19_44/2_w2	189/18/1684	19_44/2	2018-07-11	2018-07-30	Kaptan	mg/kg	0.03	p.0,03		-	1	Eurofins	SFBA0-7	3.51	54.695007	18.422677	54.693555	18.426393	54.691556	18.425256	54.693084	18.419877
Michał Korthals	8	19	19_44/2_w2	189/18/1684	19_44/2	2018-07-11	2018-07-30	Karbofenotion	mg/kg	0.015	p.0,015		-	1	Eurofins	SFBA0-7	3.51	54.695007	18.422677	54.693555	18.426393	54.691556	18.425256	54.693084	18.419877
Michał Korthals	8	19	19_44/2_w2	189/18/1684	19_44/2	2018-07-11	2018-07-30	Carbophenothion-methyl	mg/kg	0.03	p.0,03		-	1	Eurofins	SFBA0-7	3.51	54.695007	18.422677	54.693555	18.426393	54.691556	18.425256	54.693084	18.419877
Michał Korthals	8	19	19_44/2_w2	189/18/1684	19_44/2	2018-07-11	2018-07-30	Carfentrazone-ethyl	mg/kg	0.03	p.0,03		-	1	Eurofins	SFBA0-7	3.51	54.695007	18.422677	54.693555	18.426393	54.691556	18.425256	54.693084	18.419877
Michał Korthals	8	19	19_44/2_w2	189/18/1684	19_44/2	2018-07-11	2018-07-30	Chinometionat	mg/kg	0.015	p.0,015		-	1	Eurofins	SFBA0-7	3.51	54.695007	18.422677	54.693555	18.426393	54.691556	18.425256	54.693084	18.419877
Michał Korthals	8	19	19_44/2_w2	189/18/1684	19_44/2	2018-07-11	2018-07-30	Chlorbenzyd	mg/kg	0.015	p.0,015		-	1	Eurofins	SFBA0-7	3.51	54.695007	18.422677	54.693555	18.426393	54.691556	18.425256	54.693084	18.419877
Michał Korthals	8	19	19_44/2_w2	189/18/1684	19_44/2	2018-07-11	2018-07-30	Chlordane (total)	mg/kg	0.03	p.0,03		-	1	Eurofins	SFBA0-7	3.51	54.695007	18.422677	54.693555	18.426393	54.691556	18.425256	54.693084	18.419877
Michał Korthals	8	19	19_44/2_w2	189/18/1684	19_44/2	2018-07-11	2018-07-30	Chlordan,cis-	mg/kg	0.015	p.0,015		-	1	Eurofins	SFBA0-7	3.51	54.695007	18.422677	54.693555	18.426393	54.691556	18.425256	54.693084	18.419877
Michał Korthals	8	19	19_44/2_w2	189/18/1684	19_44/2	2018-07-11	2018-07-30	Chlordan,oxy-	mg/kg	0.03	p.0,03		-	1	Eurofins	SFBA0-7	3.51	54.695007	18.422677	54.693555	18.426393	54.691556	18.425256	54.693084	18.419877
Michał Korthals	8	19	19_44/2_w2	189/18/1684	19_44/2	2018-07-11	2018-07-30	Chlordan,gamma/trans-	mg/kg	0.015	p.0,015		-	1	Eurofins	SFBA0-7	3.51	54.695007	18.422677	54.693555	18.426393	54.691556	18.425256	54.693084	18.419877
Michał Korthals	8	19	19_44/2_w2	189/18/1684	19_44/2	2018-07-11	2018-07-30	Chlordecon	mg/kg	0.03	p.0,03		-	1	Eurofins	SFBA0-7	3.51	54.695007	18.422677	54.693555	18.426393	54.691556	18.425256	54.693084	18.419877
Michał Korthals	8	19	19_44/2_w2	189/18/1684	19_44/2	2018-07-11	2018-07-30	Chlorethoksyfos	mg/kg	0.015	p.0,015		-	1	Eurofins	SFBA0-7	3.51	54.695007	18.422677	54.693555	18.426393	54.691556	18.425256	54.693084	18.419877
Michał Korthals	8	19	19_44/2_w2	189/18/1684	19_44/2	2018-07-11	2018-07-30	Chlorfenapyr	mg/kg	0.015	p.0,015		-	1	Eurofins	SFBA0-7	3.51	54.695007	18.422677	54.693555	18.426393	54.691556	18.425256	54.693084	18.419877
Michał Korthals	8	19	19_44/2_w2	189/18/1684	19_44/2	2018-07-11	2018-07-30	Chlorfenprop-methyl	mg/kg	0.03	p.0,03		-	1	Eurofins	SFBA0-7	3.51	54.695007	18.422677	54.693555	18.426393	54.691556	18.425256	54.693084	18.419877
Michał Korthals	8	19	19_44/2_w2	189/18/1684	19_44/2	2018-07-11	2018-07-30	Chlorfenson	mg/kg	0.015	p.0,015		-	1	Eurofins	SFBA0-7	3.51	54.695007	18.422677	54.693555	18.426393	54.691556	18.425256	54.693084	18.419877
Michał Korthals	8	19	19_44/2_w2	189/18/1684	19_44/2	2018-07-11	2018-07-30	Chlorfenwinfos	mg/kg	0.03	p.0,03		-	1	Eurofins	SFBA0-7	3.51	54.695007	18.422677	54.693555	18.426393	54.691556	18.425256	54.693084	18.419877
Michał Korthals	8	19	19_44/2_w2	189/18/1684	19_44/2	2018-07-11	2018-07-30	Chloridazon	mg/kg	0.03	p.0,03		-	1	Eurofins	SFBA0-7	3.51	54.695007	18.422677	54.693555	18.426393	54.691556	18.425256	54.693084	18.419877
Michał Korthals	8	19	19_44/2_w2	189/18/1684	19_44/2	2018-07-11	2018-07-30	Chlormephos	mg/kg	0.015	p.0,015		-	1	Eurofins	SFBA0-7	3.51	54.695007	18.422677	54.693555	18.426393	54.691556	18.425256	54.693084	18.419877
Michał Korthals	8	19	19_44/2_w2	189/18/1684	19_44/2	2018-07-11	2018-07-30	Chlorobenzylat	mg/kg	0.015	p.0,015		-	1	Eurofins	SFBA0-7	3.51	54.695007	18.422677	54.693555	18.426393	54.691556	18.425256	54.693084	18.419877
Michał Korthals	8	19	19_44/2_w2	189/18/1684	19_44/2	2018-07-11	2018-07-30	Chloroneb	mg/kg	0.03	p.0,03		-	1	Eurofins	SFBA0-7	3.51	54.695007	18.422677	54.693555	18.426393	54.691556	18.425256	54.693084	18.419877
Michał Korthals	8	19	19_44/2_w2	189/18/1684	19_44/2	2018-07-11	2018-07-30	Chloropropylat	mg/kg	0.015	p.0,015		-	1	Eurofins	SFBA0-7	3.51	54.695007	18.422677	54.693555	18.426393	54.691556	18.425256	54.693084	18.419877
Michał Korthals	8	19	19_44/2_w2	189/18/1684	19_44/2	2018-07-11	2018-07-30	Chlorotalonil	mg/kg	0.015	p.0,015		-	1	Eurofins	SFBA0-7	3.51	54.695007	18.422677	54.693555	18.426393	54.691556	18.425256	54.693084	18.419877
Michał Korthals	8	19	19_44/2_w2	189/18/1684	19_44/2	2018-07-11	2018-07-30	Chlorpiryfos etylowy	mg/kg	0.015	0.015	±	0.008	0	Eurofins	SFBA0-7	3.51	54.695007	18.422677	54.693555	18.426393	54.691556	18.425256	54.693084	18.419877
Michał Korthals	8	19	19_44/2_w2	189/18/1684	19_44/2	2018-07-11	2018-07-30	Chlorpiryfos metylowy	mg/kg	0.015	p.0,015		-	1	Eurofins	SFBA0-7	3.51	54.695007	18.422677	54.693555	18.426393	54.691556	18.425256	54.693084	18.419877
Michał Korthals	8	19	19_44/2_w2	189/18/1684	19_44/2	2018-07-11	2018-07-30	Chlorthal-dimethyl	mg/kg	0.015	p.0,015		-	1	Eurofins	SFBA0-7	3.51	54.695007	18.422677	54.693555	18.426393	54.691556	18.425256	54.693084	18.419877
Michał Korthals	8	19	19_44/2_w2	189/18/1684	19_44/2	2018-07-11	2018-07-30	Chlorotion	mg/kg	0.03	p.0,03		-	1	Eurofins	SFBA0-7	3.51	54.695007	18.422677	54.693555	18.426393	54.691556	18.425256	54.693084	18.419877
Michał Korthals	8	19	19_44/2_w2	189/18/1684	19_44/2	2018-07-11	2018-07-30	Chlortiofos	mg/kg	0.015	p.0,015		-	1	Eurofins	SFBA0-7	3.51	54.695007	18.422677	54.693555	18.426393	54.691556	18.425256	54.693084	18.419877
Michał Korthals	8	19	19_44/2_w2	189/18/1684	19_44/2	2018-07-11	2018-07-30	Chlozolinate	mg/kg	0.03	p.0,03		-	1	Eurofins	SFBA0-7	3.51	54.695007	18.422677	54.693555	18.426393	54.691556	18.425256	54.693084	18.419877
Michał Korthals	8	19	19_44/2_w2	189/18/1684	19_44/2	2018-07-11	2018-07-30	Cinidon-ethyl	mg/kg	0.03	p.0,03		-	1	Eurofins	SFBA0-7	3.51	54.695007	18.422677	54.693555	18.426393	54.691556	18.425256	54.693084	18.419877
Michał Korthals	8	19	19_44/2_w2	189/18/1684	19_44/2	2018-07-11	2018-07-30	Clodinafop-propargyl	mg/kg	0.09	p.0,09		-	1	Eurofins	SFBA0-7	3.51	54.695007	18.422677	54.693555	18.426393	54.691556	18.425256	54.693084	18.419877
Michał Korthals	8	19	19_44/2_w2	189/18/1684	19_44/2	2018-07-11	2018-07-30	Kumafos	mg/kg	0.015	p.0,015		-	1	Eurofins	SFBA0-7	3.51	54.695007	18.422677	54.693555	18.426393	54.691556	18.425256	54.693084	18.419877
Michał Korthals	8	19	19_44/2_w2	189/18/1684	19_44/2	2018-07-11	2018-07-30	Crotoxyphos	mg/kg	0.03	p.0,03		-	1	Eurofins	SFBA0-7	3.51	54.695007	18.422677	54.693555	18.426393	54.691556	18.425256	54.693084	18.419877
Michał Korthals	8	19	19_44/2_w2	189/18/1684	19_44/2	2018-07-11	2018-07-30	Cyjanofenfos	mg/kg	0.03	p.0,03		-	1	Eurofins	SFBA0-7	3.51	54.695007	18.422677	54.693555	18.426393	54.691556	18.425256	54.693084	18.419877
Michał Korthals	8	19	19_44/2_w2	189/18/1684	19_44/2	2018-07-11	2018-07-30	Cyanophos	mg/kg	0.03	p.0,03		-	1	Eurofins	SFBA0-7	3.51	54.695007	18.422677	54.693555	18.426393	54.691556	18.425256	54.693084	18.419877
Michał Korthals	8	19	19_44/2_w2	189/18/1684	19_44/2	2018-07-11	2018-07-30	Cyflutryna	mg/kg	0.03	p.0,03		-	1	Eurofins	SFBA0-7	3.51	54.695007	18.422677	54.693555	18.426393	54.691556	18.425256	54.693084	18.419877
Michał Korthals	8	19	19_44/2_w2	189/18/1684	19_44/2	2018-07-11	2018-07-30	lambda-Cyhalotryna	mg/kg	0.03	p.0,03		-	1	Eurofins	SFBA0-7	3.51	54.695007	18.422677	54.693555	18.426393	54.691556	18.425256	54.693084	18.419877
Michał Korthals	8	19	19_44/2_w2	189/18/1684	19_44/2	2018-07-11	2018-07-30	Cypermetryna	mg/kg	0.015	p.0,015		-	1	Eurofins	SFBA0-7	3.51	54.695007	18.422677	54.693555	18.426393	54.691556	18.425256	54.693084	18.419877
Michał Korthals	8	19	19_44/2_w2	189/18/1684	19_44/2	2018-07-11	2018-07-30	Cyphenothrin	mg/kg	0.03	p.0,03		-	1	Eurofins	SFBA0-7	3.51	54.695007	18.422677	54.693555	18.426393	54.691556	18.425256	54.693084	18.419877
Michał Korthals	8	19	19_44/2_w2	189/18/1684	19_44/2	2018-07-11	2018-07-30	Cyprokonazol	mg/kg	0.12	p.0,12		-	1	Eurofins	SFBA0-7	3.51	54.695007	18.422677	54.693555	18.426393	54.691556	18.425256	54.693084	18.419877
Michał Korthals	8	19	19_44/2_w2	189/18/1684	19_44/2	2018-07-11	2018-07-30	DDD-o,p	mg/kg	0.015	p.0,015		-	1	Eurofins	SFBA0-7	3.51	54.695007	18.422677	54.693555	18.426393	54.691556	18.425256	54.693084	18.419877
Michał Korthals	8	19	19_44/2_w2	189/18/1684	19_44/2	2018-07-11	2018-07-30	DDE-o,p	mg/kg	0.015	p.0,015		-	1	Eurofins	SFBA0-7	3.51	54.695007	18.422677	54.693555	18.426393	54.691556	18.425256	54.693084	18.419877
Michał Korthals	8	19	19_44/2_w2	189/18/1684	19_44/2	2018-07-11	2018-07-30	DDT(p,p'-DDT+o,p'-DDT+p.p'-DDE+p,p'-TDE)	mg/kg	0.015	p.0,015		-	1	Eurofins	SFBA0-7	3.51	54.695007	18.422677	54.693555	18.426393	54.691556	18.425256	54.693084	18.419877
Michał Korthals	8	19	19_44/2_w2	189/18/1684	19_44/2	2018-07-11	2018-07-30	Deltametryna	mg/kg	0.015	p.0,015		-	1	Eurofins	SFBA0-7	3.51	54.695007	18.422677	54.693555	18.426393	54.691556	18.425256	54.693084	18.419877
Michał Korthals	8	19	19_44/2_w2	189/18/1684	19_44/2	2018-07-11	2018-07-30	Dialifos	mg/kg	0.03	p.0,03		-	1	Eurofins	SFBA0-7	3.51	54.695007	18.422677	54.693555	18.426393	54.691556	18.425256	54.693084	18.419877
Michał Korthals	8	19	19_44/2_w2	189/18/1684	19_44/2	2018-07-11	2018-07-30	Di-allate	mg/kg	0.03	p.0,03		-	1	Eurofins	SFBA0-7	3.51	54.695007	18.422677	54.693555	18.426393	54.691556	18.425256	54.693084	18.419877
Michał Korthals	8	19	19_44/2_w2	189/18/1684	19_44/2	2018-07-11	2018-07-30	Diazynon	mg/kg	0.03	p.0,03		-	1	Eurofins	SFBA0-7	3.51	54.695007	18.422677	54.693555	18.426393	54.691556	18.425256	54.693084	18.419877
Michał Korthals	8	19	19_44/2_w2	189/18/1684	19_44/2	2018-07-11	2018-07-30	4,4-Dibromobenzophenone	mg/kg	0.03	p.0,03		-	1	Eurofins	SFBA0-7	3.51	54.695007	18.422677	54.693555	18.426393	54.691556	18.425256	54.693084	18.419877
Michał Korthals	8	19	19_44/2_w2	189/18/1684	19_44/2	2018-07-11	2018-07-30	Dicapthon	mg/kg	0.03	p.0,03		-	1	Eurofins	SFBA0-7	3.51	54.695007	18.422677	54.693555	18.426393	54.691556	18.425256	54.693084	18.419877
Michał Korthals	8	19	19_44/2_w2	189/18/1684	19_44/2	2018-07-11	2018-07-30	Dichlobenil	mg/kg	0.15	p.0,15		-	1	Eurofins	SFBA0-7	3.51	54.695007	18.422677	54.693555	18.426393	54.691556	18.425256	54.693084	18.419877
Michał Korthals	8	19	19_44/2_w2	189/18/1684	19_44/2	2018-07-11	2018-07-30	Dichlofention	mg/kg	0.03	p.0,03		-	1	Eurofins	SFBA0-7	3.51	54.695007	18.422677	54.693555	18.426393	54.691556	18.425256	54.693084	18.419877
Michał Korthals	8	19	19_44/2_w2	189/18/1684	19_44/2	2018-07-11	2018-07-30	Dichlofluanid	mg/kg	0.015	p.0,015		-	1	Eurofins	SFBA0-7	3.51	54.695007	18.422677	54.693555	18.426393	54.691556	18.425256	54.693084	18.419877
Michał Korthals	8	19	19_44/2_w2	189/18/1684	19_44/2	2018-07-11	2018-07-30	Dichloran	mg/kg	0.075	p.0,075		-	1	Eurofins	SFBA0-7	3.51	54.695007	18.422677	54.693555	18.426393	54.691556	18.425256	54.693084	18.419877
Michał Korthals	8	19	19_44/2_w2	189/18/1684	19_44/2	2018-07-11	2018-07-30	Dichlorfos	mg/kg	0.06	p.0,06		-	1	Eurofins	SFBA0-7	3.51	54.695007	18.422677	54.693555	18.426393	54.691556	18.425256	54.693084	18.419877
Michał Korthals	8	19	19_44/2_w2	189/18/1684	19_44/2	2018-07-11	2018-07-30	Diclofop-methyl	mg/kg	0.015	p.0,015		-	1	Eurofins	SFBA0-7	3.51	54.695007	18.422677	54.693555	18.426393	54.691556	18.425256	54.693084	18.419877
Michał Korthals	8	19	19_44/2_w2	189/18/1684	19_44/2	2018-07-11	2018-07-30	Dikofol (suma)	mg/kg	0.015	p.0,015		-	1	Eurofins	SFBA0-7	3.51	54.695007	18.422677	54.693555	18.426393	54.691556	18.425256	54.693084	18.419877
Michał Korthals	8	19	19_44/2_w2	189/18/1684	19_44/2	2018-07-11	2018-07-30	Dicofol,o,p-	mg/kg	0.015	p.0,015		-	1	Eurofins	SFBA0-7	3.51	54.695007	18.422677	54.693555	18.426393	54.691556	18.425256	54.693084	18.419877
Michał Korthals	8	19	19_44/2_w2	189/18/1684	19_44/2	2018-07-11	2018-07-30	Dicofol,p,p--	mg/kg	0.015	p.0,015		-	1	Eurofins	SFBA0-7	3.51	54.695007	18.422677	54.693555	18.426393	54.691556	18.425256	54.693084	18.419877
Michał Korthals	8	19	19_44/2_w2	189/18/1684	19_44/2	2018-07-11	2018-07-30	Dicrotophos	mg/kg	0.03	p.0,03		-	1	Eurofins	SFBA0-7	3.51	54.695007	18.422677	54.693555	18.426393	54.691556	18.425256	54.693084	18.419877
Michał Korthals	8	19	19_44/2_w2	189/18/1684	19_44/2	2018-07-11	2018-07-30	Dieldryna	mg/kg	0.015	p.0,015		-	1	Eurofins	SFBA0-7	3.51	54.695007	18.422677	54.693555	18.426393	54.691556	18.425256	54.693084	18.419877
Michał Korthals	8	19	19_44/2_w2	189/18/1684	19_44/2	2018-07-11	2018-07-30	Dienochlor	mg/kg	0.03	p.0,03		-	1	Eurofins	SFBA0-7	3.51	54.695007	18.422677	54.693555	18.426393	54.691556	18.425256	54.693084	18.419877
Michał Korthals	8	19	19_44/2_w2	189/18/1684	19_44/2	2018-07-11	2018-07-30	Difenokonazol	mg/kg	0.045	p.0,045		-	1	Eurofins	SFBA0-7	3.51	54.695007	18.422677	54.693555	18.426393	54.691556	18.425256	54.693084	18.419877
Michał Korthals	8	19	19_44/2_w2	189/18/1684	19_44/2	2018-07-11	2018-07-30	Diflufenican	mg/kg	0.03	p.0,03		-	1	Eurofins	SFBA0-7	3.51	54.695007	18.422677	54.693555	18.426393	54.691556	18.425256	54.693084	18.419877
Michał Korthals	8	19	19_44/2_w2	189/18/1684	19_44/2	2018-07-11	2018-07-30	Dimefox	mg/kg	0.15	p.0,15		-	1	Eurofins	SFBA0-7	3.51	54.695007	18.422677	54.693555	18.426393	54.691556	18.425256	54.693084	18.419877
Michał Korthals	8	19	19_44/2_w2	189/18/1684	19_44/2	2018-07-11	2018-07-30	Dimetrachlor	mg/kg	0.03	p.0,03		-	1	Eurofins	SFBA0-7	3.51	54.695007	18.422677	54.693555	18.426393	54.691556	18.425256	54.693084	18.419877
Michał Korthals	8	19	19_44/2_w2	189/18/1684	19_44/2	2018-07-11	2018-07-30	Dimethipine	mg/kg	0.03	p.0,03		-	1	Eurofins	SFBA0-7	3.51	54.695007	18.422677	54.693555	18.426393	54.691556	18.425256	54.693084	18.419877
Michał Korthals	8	19	19_44/2_w2	189/18/1684	19_44/2	2018-07-11	2018-07-30	Dimetoat	mg/kg	0.06	p.0,06		-	1	Eurofins	SFBA0-7	3.51	54.695007	18.422677	54.693555	18.426393	54.691556	18.425256	54.693084	18.419877
Michał Korthals	8	19	19_44/2_w2	189/18/1684	19_44/2	2018-07-11	2018-07-30	Dimetomorf	mg/kg	0.03	p.0,03		-	1	Eurofins	SFBA0-7	3.51	54.695007	18.422677	54.693555	18.426393	54.691556	18.425256	54.693084	18.419877
Michał Korthals	8	19	19_44/2_w2	189/18/1684	19_44/2	2018-07-11	2018-07-30	Dinikonazol	mg/kg	0.03	p.0,03		-	1	Eurofins	SFBA0-7	3.51	54.695007	18.422677	54.693555	18.426393	54.691556	18.425256	54.693084	18.419877
Michał Korthals	8	19	19_44/2_w2	189/18/1684	19_44/2	2018-07-11	2018-07-30	Dinitramine	mg/kg	0.03	p.0,03		-	1	Eurofins	SFBA0-7	3.51	54.695007	18.422677	54.693555	18.426393	54.691556	18.425256	54.693084	18.419877
Michał Korthals	8	19	19_44/2_w2	189/18/1684	19_44/2	2018-07-11	2018-07-30	Dinobuton	mg/kg	0.1	p.0.,1		-	1	Eurofins	SFBA0-7	3.51	54.695007	18.422677	54.693555	18.426393	54.691556	18.425256	54.693084	18.419877
Michał Korthals	8	19	19_44/2_w2	189/18/1684	19_44/2	2018-07-11	2018-07-30	Disulfoton	mg/kg	0.03	p.0,03		-	1	Eurofins	SFBA0-7	3.51	54.695007	18.422677	54.693555	18.426393	54.691556	18.425256	54.693084	18.419877
Michał Korthals	8	19	19_44/2_w2	189/18/1684	19_44/2	2018-07-11	2018-07-30	Disulfoton-sulfon	mg/kg	0.03	p.0,03		-	1	Eurofins	SFBA0-7	3.51	54.695007	18.422677	54.693555	18.426393	54.691556	18.425256	54.693084	18.419877
Michał Korthals	8	19	19_44/2_w2	189/18/1684	19_44/2	2018-07-11	2018-07-30	Ditalimfos	mg/kg	0.015	p.0,015		-	1	Eurofins	SFBA0-7	3.51	54.695007	18.422677	54.693555	18.426393	54.691556	18.425256	54.693084	18.419877
Michał Korthals	8	19	19_44/2_w2	189/18/1684	19_44/2	2018-07-11	2018-07-30	Edifenphos	mg/kg	0.03	p.0,03		-	1	Eurofins	SFBA0-7	3.51	54.695007	18.422677	54.693555	18.426393	54.691556	18.425256	54.693084	18.419877
Michał Korthals	8	19	19_44/2_w2	189/18/1684	19_44/2	2018-07-11	2018-07-30	Endosulfan (suma izomerów)	mg/kg	0.015	p.0,015		-	1	Eurofins	SFBA0-7	3.51	54.695007	18.422677	54.693555	18.426393	54.691556	18.425256	54.693084	18.419877
Michał Korthals	8	19	19_44/2_w2	189/18/1684	19_44/2	2018-07-11	2018-07-30	alfa-Endosulfan	mg/kg	0.015	p.0,015		-	1	Eurofins	SFBA0-7	3.51	54.695007	18.422677	54.693555	18.426393	54.691556	18.425256	54.693084	18.419877
Michał Korthals	8	19	19_44/2_w2	189/18/1684	19_44/2	2018-07-11	2018-07-30	Siarczan endosulfanu	mg/kg	0.015	p.0,015		-	1	Eurofins	SFBA0-7	3.51	54.695007	18.422677	54.693555	18.426393	54.691556	18.425256	54.693084	18.419877
Michał Korthals	8	19	19_44/2_w2	189/18/1684	19_44/2	2018-07-11	2018-07-30	beta-Endosulfan	mg/kg	0.015	p.0,015		-	1	Eurofins	SFBA0-7	3.51	54.695007	18.422677	54.693555	18.426393	54.691556	18.425256	54.693084	18.419877
Michał Korthals	8	19	19_44/2_w2	189/18/1684	19_44/2	2018-07-11	2018-07-30	Endryna	mg/kg	0.015	p.0,015		-	1	Eurofins	SFBA0-7	3.51	54.695007	18.422677	54.693555	18.426393	54.691556	18.425256	54.693084	18.419877
Michał Korthals	8	19	19_44/2_w2	189/18/1684	19_44/2	2018-07-11	2018-07-30	Ketoendrin-delta	mg/kg	0.015	p.0,015		-	1	Eurofins	SFBA0-7	3.51	54.695007	18.422677	54.693555	18.426393	54.691556	18.425256	54.693084	18.419877
Michał Korthals	8	19	19_44/2_w2	189/18/1684	19_44/2	2018-07-11	2018-07-30	EPN	mg/kg	0.03	p.0,03		-	1	Eurofins	SFBA0-7	3.51	54.695007	18.422677	54.693555	18.426393	54.691556	18.425256	54.693084	18.419877
Michał Korthals	8	19	19_44/2_w2	189/18/1684	19_44/2	2018-07-11	2018-07-30	Epoksykonazol	mg/kg	0.12	p.0,12		-	1	Eurofins	SFBA0-7	3.51	54.695007	18.422677	54.693555	18.426393	54.691556	18.425256	54.693084	18.419877
Michał Korthals	8	19	19_44/2_w2	189/18/1684	19_44/2	2018-07-11	2018-07-30	Etaconazole	mg/kg	0.06	p.0,06		-	1	Eurofins	SFBA0-7	3.51	54.695007	18.422677	54.693555	18.426393	54.691556	18.425256	54.693084	18.419877
Michał Korthals	8	19	19_44/2_w2	189/18/1684	19_44/2	2018-07-11	2018-07-30	Ethalfluralin	mg/kg	0.03	p.0,03		-	1	Eurofins	SFBA0-7	3.51	54.695007	18.422677	54.693555	18.426393	54.691556	18.425256	54.693084	18.419877
Michał Korthals	8	19	19_44/2_w2	189/18/1684	19_44/2	2018-07-11	2018-07-30	Etion	mg/kg	0.015	p.0,015		-	1	Eurofins	SFBA0-7	3.51	54.695007	18.422677	54.693555	18.426393	54.691556	18.425256	54.693084	18.419877
Michał Korthals	8	19	19_44/2_w2	189/18/1684	19_44/2	2018-07-11	2018-07-30	Ethiprol	mg/kg	0.06	p.0,06		-	1	Eurofins	SFBA0-7	3.51	54.695007	18.422677	54.693555	18.426393	54.691556	18.425256	54.693084	18.419877
Michał Korthals	8	19	19_44/2_w2	189/18/1684	19_44/2	2018-07-11	2018-07-30	Etofumesat	mg/kg	0.15	p.0,15		-	1	Eurofins	SFBA0-7	3.51	54.695007	18.422677	54.693555	18.426393	54.691556	18.425256	54.693084	18.419877
Michał Korthals	8	19	19_44/2_w2	189/18/1684	19_44/2	2018-07-11	2018-07-30	Etoprofos	mg/kg	0.015	p.0,015		-	1	Eurofins	SFBA0-7	3.51	54.695007	18.422677	54.693555	18.426393	54.691556	18.425256	54.693084	18.419877
Michał Korthals	8	19	19_44/2_w2	189/18/1684	19_44/2	2018-07-11	2018-07-30	Etridiazole	mg/kg	0.015	p.0,015		-	1	Eurofins	SFBA0-7	3.51	54.695007	18.422677	54.693555	18.426393	54.691556	18.425256	54.693084	18.419877
Michał Korthals	8	19	19_44/2_w2	189/18/1684	19_44/2	2018-07-11	2018-07-30	Etrimfos	mg/kg	0.015	p.0,015		-	1	Eurofins	SFBA0-7	3.51	54.695007	18.422677	54.693555	18.426393	54.691556	18.425256	54.693084	18.419877
Michał Korthals	8	19	19_44/2_w2	189/18/1684	19_44/2	2018-07-11	2018-07-30	Famophos	mg/kg	0.03	p.0,03		-	1	Eurofins	SFBA0-7	3.51	54.695007	18.422677	54.693555	18.426393	54.691556	18.425256	54.693084	18.419877
Michał Korthals	8	19	19_44/2_w2	189/18/1684	19_44/2	2018-07-11	2018-07-30	Famoksadon	mg/kg	0.03	p.0,03		-	1	Eurofins	SFBA0-7	3.51	54.695007	18.422677	54.693555	18.426393	54.691556	18.425256	54.693084	18.419877
Michał Korthals	8	19	19_44/2_w2	189/18/1684	19_44/2	2018-07-11	2018-07-30	Fenamidon	mg/kg	0.06	p.0,06		-	1	Eurofins	SFBA0-7	3.51	54.695007	18.422677	54.693555	18.426393	54.691556	18.425256	54.693084	18.419877
Michał Korthals	8	19	19_44/2_w2	189/18/1684	19_44/2	2018-07-11	2018-07-30	Fenamifos (suma izomerów)	mg/kg	0.06	p.0,06		-	1	Eurofins	SFBA0-7	3.51	54.695007	18.422677	54.693555	18.426393	54.691556	18.425256	54.693084	18.419877
Michał Korthals	8	19	19_44/2_w2	189/18/1684	19_44/2	2018-07-11	2018-07-30	Fenarimol	mg/kg	0.15	p.0,15		-	1	Eurofins	SFBA0-7	3.51	54.695007	18.422677	54.693555	18.426393	54.691556	18.425256	54.693084	18.419877
Michał Korthals	8	19	19_44/2_w2	189/18/1684	19_44/2	2018-07-11	2018-07-30	Fenbukonazol	mg/kg	0.03	p.0,03		-	1	Eurofins	SFBA0-7	3.51	54.695007	18.422677	54.693555	18.426393	54.691556	18.425256	54.693084	18.419877
Michał Korthals	8	19	19_44/2_w2	189/18/1684	19_44/2	2018-07-11	2018-07-30	Fenchlorazole	mg/kg	0.03	p.0,03		-	1	Eurofins	SFBA0-7	3.51	54.695007	18.422677	54.693555	18.426393	54.691556	18.425256	54.693084	18.419877
Michał Korthals	8	19	19_44/2_w2	189/18/1684	19_44/2	2018-07-11	2018-07-30	Fenchlorofos	mg/kg	0.015	p.0,015		-	1	Eurofins	SFBA0-7	3.51	54.695007	18.422677	54.693555	18.426393	54.691556	18.425256	54.693084	18.419877
Michał Korthals	8	19	19_44/2_w2	189/18/1684	19_44/2	2018-07-11	2018-07-30	Fenfluthrine	mg/kg	0.03	p.0,03		-	1	Eurofins	SFBA0-7	3.51	54.695007	18.422677	54.693555	18.426393	54.691556	18.425256	54.693084	18.419877
Michał Korthals	8	19	19_44/2_w2	189/18/1684	19_44/2	2018-07-11	2018-07-30	Fenheksamid	mg/kg	0.15	p.0,15		-	1	Eurofins	SFBA0-7	3.51	54.695007	18.422677	54.693555	18.426393	54.691556	18.425256	54.693084	18.419877
Michał Korthals	8	19	19_44/2_w2	189/18/1684	19_44/2	2018-07-11	2018-07-30	Fenitrotion	mg/kg	0.015	p.0,015		-	1	Eurofins	SFBA0-7	3.51	54.695007	18.422677	54.693555	18.426393	54.691556	18.425256	54.693084	18.419877
Michał Korthals	8	19	19_44/2_w2	189/18/1684	19_44/2	2018-07-11	2018-07-30	Fenoxaprop-ethyl	mg/kg	0.15	p.0,15		-	1	Eurofins	SFBA0-7	3.51	54.695007	18.422677	54.693555	18.426393	54.691556	18.425256	54.693084	18.419877
Michał Korthals	8	19	19_44/2_w2	189/18/1684	19_44/2	2018-07-11	2018-07-30	Fenpiclonil	mg/kg	0.15	p.0,15		-	1	Eurofins	SFBA0-7	3.51	54.695007	18.422677	54.693555	18.426393	54.691556	18.425256	54.693084	18.419877
Michał Korthals	8	19	19_44/2_w2	189/18/1684	19_44/2	2018-07-11	2018-07-30	Fenpropatryna	mg/kg	0.015	p.0,015		-	1	Eurofins	SFBA0-7	3.51	54.695007	18.422677	54.693555	18.426393	54.691556	18.425256	54.693084	18.419877
Michał Korthals	8	19	19_44/2_w2	189/18/1684	19_44/2	2018-07-11	2018-07-30	Fenpropimorf	mg/kg	0.15	p.0,15		-	1	Eurofins	SFBA0-7	3.51	54.695007	18.422677	54.693555	18.426393	54.691556	18.425256	54.693084	18.419877
Michał Korthals	8	19	19_44/2_w2	189/18/1684	19_44/2	2018-07-11	2018-07-30	Fenson	mg/kg	0.03	p.0,03		-	1	Eurofins	SFBA0-7	3.51	54.695007	18.422677	54.693555	18.426393	54.691556	18.425256	54.693084	18.419877
Michał Korthals	8	19	19_44/2_w2	189/18/1684	19_44/2	2018-07-11	2018-07-30	Fensulfotion	mg/kg	0.03	p.0,03		-	1	Eurofins	SFBA0-7	3.51	54.695007	18.422677	54.693555	18.426393	54.691556	18.425256	54.693084	18.419877
Michał Korthals	8	19	19_44/2_w2	189/18/1684	19_44/2	2018-07-11	2018-07-30	Fewalerat (suma izomer ów)	mg/kg	0.015	p.0,015		-	1	Eurofins	SFBA0-7	3.51	54.695007	18.422677	54.693555	18.426393	54.691556	18.425256	54.693084	18.419877
Michał Korthals	8	19	19_44/2_w2	189/18/1684	19_44/2	2018-07-11	2018-07-30	Fenwalerat	mg/kg	0.015	p.0,015		-	1	Eurofins	SFBA0-7	3.51	54.695007	18.422677	54.693555	18.426393	54.691556	18.425256	54.693084	18.419877
Michał Korthals	8	19	19_44/2_w2	189/18/1684	19_44/2	2018-07-11	2018-07-30	Fenvalerate(RS-/SR-Izomer)	mg/kg	0.015	p.0,015		-	1	Eurofins	SFBA0-7	3.51	54.695007	18.422677	54.693555	18.426393	54.691556	18.425256	54.693084	18.419877
Michał Korthals	8	19	19_44/2_w2	189/18/1684	19_44/2	2018-07-11	2018-07-30	Fipronil	mg/kg	0.012	p.0,012		-	1	Eurofins	SFBA0-7	3.51	54.695007	18.422677	54.693555	18.426393	54.691556	18.425256	54.693084	18.419877
Michał Korthals	8	19	19_44/2_w2	189/18/1684	19_44/2	2018-07-11	2018-07-30	Fipronil,desulfinyl-	mg/kg	0.012	p.0,012		-	1	Eurofins	SFBA0-7	3.51	54.695007	18.422677	54.693555	18.426393	54.691556	18.425256	54.693084	18.419877
Michał Korthals	8	19	19_44/2_w2	189/18/1684	19_44/2	2018-07-11	2018-07-30	Fipranil+Sulfonmetab.MB46136(suma)	mg/kg	0.015	p.0,015		-	1	Eurofins	SFBA0-7	3.51	54.695007	18.422677	54.693555	18.426393	54.691556	18.425256	54.693084	18.419877
Michał Korthals	8	19	19_44/2_w2	189/18/1684	19_44/2	2018-07-11	2018-07-30	Fipronil sulfid	mg/kg	0.015	p.0,015		-	1	Eurofins	SFBA0-7	3.51	54.695007	18.422677	54.693555	18.426393	54.691556	18.425256	54.693084	18.419877
Michał Korthals	8	19	19_44/2_w2	189/18/1684	19_44/2	2018-07-11	2018-07-30	Fipronil sulfon	mg/kg	0.015	p.0,015		-	1	Eurofins	SFBA0-7	3.51	54.695007	18.422677	54.693555	18.426393	54.691556	18.425256	54.693084	18.419877
Michał Korthals	8	19	19_44/2_w2	189/18/1684	19_44/2	2018-07-11	2018-07-30	Flamprop-isopropyl	mg/kg	0.03	p.0,03		-	1	Eurofins	SFBA0-7	3.51	54.695007	18.422677	54.693555	18.426393	54.691556	18.425256	54.693084	18.419877
Michał Korthals	8	19	19_44/2_w2	189/18/1684	19_44/2	2018-07-11	2018-07-30	Flamprop-methyl	mg/kg	0.03	p.0,03		-	1	Eurofins	SFBA0-7	3.51	54.695007	18.422677	54.693555	18.426393	54.691556	18.425256	54.693084	18.419877
Michał Korthals	8	19	19_44/2_w2	189/18/1684	19_44/2	2018-07-11	2018-07-30	Flonikamid	mg/kg	0.15	p.0,15		-	1	Eurofins	SFBA0-7	3.51	54.695007	18.422677	54.693555	18.426393	54.691556	18.425256	54.693084	18.419877
Michał Korthals	8	19	19_44/2_w2	189/18/1684	19_44/2	2018-07-11	2018-07-30	Fluazifop-butyl	mg/kg	0.15	p.0,15		-	1	Eurofins	SFBA0-7	3.51	54.695007	18.422677	54.693555	18.426393	54.691556	18.425256	54.693084	18.419877
Michał Korthals	8	19	19_44/2_w2	189/18/1684	19_44/2	2018-07-11	2018-07-30	Fluazinam	mg/kg	0.03	p.0,03		-	1	Eurofins	SFBA0-7	3.51	54.695007	18.422677	54.693555	18.426393	54.691556	18.425256	54.693084	18.419877
Michał Korthals	8	19	19_44/2_w2	189/18/1684	19_44/2	2018-07-11	2018-07-30	Fluchloralina	mg/kg	0.015	p.0,015		-	1	Eurofins	SFBA0-7	3.51	54.695007	18.422677	54.693555	18.426393	54.691556	18.425256	54.693084	18.419877
Michał Korthals	8	19	19_44/2_w2	189/18/1684	19_44/2	2018-07-11	2018-07-30	Flucytrynat	mg/kg	0.03	p.0,03		-	1	Eurofins	SFBA0-7	3.51	54.695007	18.422677	54.693555	18.426393	54.691556	18.425256	54.693084	18.419877
Michał Korthals	8	19	19_44/2_w2	189/18/1684	19_44/2	2018-07-11	2018-07-30	Flufenoksuron	mg/kg	0.03	p.0,03		-	1	Eurofins	SFBA0-7	3.51	54.695007	18.422677	54.693555	18.426393	54.691556	18.425256	54.693084	18.419877
Michał Korthals	8	19	19_44/2_w2	189/18/1684	19_44/2	2018-07-11	2018-07-30	Flumethrine	mg/kg	0.03	p.0,03		-	1	Eurofins	SFBA0-7	3.51	54.695007	18.422677	54.693555	18.426393	54.691556	18.425256	54.693084	18.419877
Michał Korthals	8	19	19_44/2_w2	189/18/1684	19_44/2	2018-07-11	2018-07-30	Flumetralin	mg/kg	0.015	p.0,015		-	1	Eurofins	SFBA0-7	3.51	54.695007	18.422677	54.693555	18.426393	54.691556	18.425256	54.693084	18.419877
Michał Korthals	8	19	19_44/2_w2	189/18/1684	19_44/2	2018-07-11	2018-07-30	Flupikolid	mg/kg	0.03	p.0,03		-	1	Eurofins	SFBA0-7	3.51	54.695007	18.422677	54.693555	18.426393	54.691556	18.425256	54.693084	18.419877
Michał Korthals	8	19	19_44/2_w2	189/18/1684	19_44/2	2018-07-11	2018-07-30	Fluorodifen	mg/kg	0.015	p.0,015		-	1	Eurofins	SFBA0-7	3.51	54.695007	18.422677	54.693555	18.426393	54.691556	18.425256	54.693084	18.419877
Michał Korthals	8	19	19_44/2_w2	189/18/1684	19_44/2	2018-07-11	2018-07-30	Fluotrimazole	mg/kg	0.1	p.0,1		-	1	Eurofins	SFBA0-7	3.51	54.695007	18.422677	54.693555	18.426393	54.691556	18.425256	54.693084	18.419877
Michał Korthals	8	19	19_44/2_w2	189/18/1684	19_44/2	2018-07-11	2018-07-30	Fluchinkonazol	mg/kg	0.03	p.0,03		-	1	Eurofins	SFBA0-7	3.51	54.695007	18.422677	54.693555	18.426393	54.691556	18.425256	54.693084	18.419877
Michał Korthals	8	19	19_44/2_w2	189/18/1684	19_44/2	2018-07-11	2018-07-30	Flurenol-butyl	mg/kg	0.06	p.0,06		-	1	Eurofins	SFBA0-7	3.51	54.695007	18.422677	54.693555	18.426393	54.691556	18.425256	54.693084	18.419877
Michał Korthals	8	19	19_44/2_w2	189/18/1684	19_44/2	2018-07-11	2018-07-30	Flurochloridon	mg/kg	0.03	p.0,03		-	1	Eurofins	SFBA0-7	3.51	54.695007	18.422677	54.693555	18.426393	54.691556	18.425256	54.693084	18.419877
Michał Korthals	8	19	19_44/2_w2	189/18/1684	19_44/2	2018-07-11	2018-07-30	Flurtamone	mg/kg	0.03	p.0,03		-	1	Eurofins	SFBA0-7	3.51	54.695007	18.422677	54.693555	18.426393	54.691556	18.425256	54.693084	18.419877
Michał Korthals	8	19	19_44/2_w2	189/18/1684	19_44/2	2018-07-11	2018-07-30	Flusilazol	mg/kg	0.075	p.0,075		-	1	Eurofins	SFBA0-7	3.51	54.695007	18.422677	54.693555	18.426393	54.691556	18.425256	54.693084	18.419877
Michał Korthals	8	19	19_44/2_w2	189/18/1684	19_44/2	2018-07-11	2018-07-30	Folpet	mg/kg	0.03	p.0,03		-	1	Eurofins	SFBA0-7	3.51	54.695007	18.422677	54.693555	18.426393	54.691556	18.425256	54.693084	18.419877
Michał Korthals	8	19	19_44/2_w2	189/18/1684	19_44/2	2018-07-11	2018-07-30	Fonofos	mg/kg	0.015	p.0,015		-	1	Eurofins	SFBA0-7	3.51	54.695007	18.422677	54.693555	18.426393	54.691556	18.425256	54.693084	18.419877
Michał Korthals	8	19	19_44/2_w2	189/18/1684	19_44/2	2018-07-11	2018-07-30	Formotion	mg/kg	0.03	p.0,03		-	1	Eurofins	SFBA0-7	3.51	54.695007	18.422677	54.693555	18.426393	54.691556	18.425256	54.693084	18.419877
Michał Korthals	8	19	19_44/2_w2	189/18/1684	19_44/2	2018-07-11	2018-07-30	Genite	mg/kg	0.03	p.0,03		-	1	Eurofins	SFBA0-7	3.51	54.695007	18.422677	54.693555	18.426393	54.691556	18.425256	54.693084	18.419877
Michał Korthals	8	19	19_44/2_w2	189/18/1684	19_44/2	2018-07-11	2018-07-30	Halfenprox	mg/kg	0.03	p.0,03		-	1	Eurofins	SFBA0-7	3.51	54.695007	18.422677	54.693555	18.426393	54.691556	18.425256	54.693084	18.419877
Michał Korthals	8	19	19_44/2_w2	189/18/1684	19_44/2	2018-07-11	2018-07-30	Haloxyfop-Ethoxyethyl	mg/kg	0.03	p.0,03		-	1	Eurofins	SFBA0-7	3.51	54.695007	18.422677	54.693555	18.426393	54.691556	18.425256	54.693084	18.419877
Michał Korthals	8	19	19_44/2_w2	189/18/1684	19_44/2	2018-07-11	2018-07-30	Haloxyfop-methyl	mg/kg	0.15	p.0,15		-	1	Eurofins	SFBA0-7	3.51	54.695007	18.422677	54.693555	18.426393	54.691556	18.425256	54.693084	18.419877
Michał Korthals	8	19	19_44/2_w2	189/18/1684	19_44/2	2018-07-11	2018-07-30	HCH (sumaizomerów-bez lindan)	mg/kg	0.015	p.0,015		-	1	Eurofins	SFBA0-7	3.51	54.695007	18.422677	54.693555	18.426393	54.691556	18.425256	54.693084	18.419877
Michał Korthals	8	19	19_44/2_w2	189/18/1684	19_44/2	2018-07-11	2018-07-30	Alfa-HCH	mg/kg	0.015	p.0,015		-	1	Eurofins	SFBA0-7	3.51	54.695007	18.422677	54.693555	18.426393	54.691556	18.425256	54.693084	18.419877
Michał Korthals	8	19	19_44/2_w2	189/18/1684	19_44/2	2018-07-11	2018-07-30	Beta-HCH	mg/kg	0.015	p.0,015		-	1	Eurofins	SFBA0-7	3.51	54.695007	18.422677	54.693555	18.426393	54.691556	18.425256	54.693084	18.419877
Michał Korthals	8	19	19_44/2_w2	189/18/1684	19_44/2	2018-07-11	2018-07-30	Delta-HCH	mg/kg	0.015	p.0,015		-	1	Eurofins	SFBA0-7	3.51	54.695007	18.422677	54.693555	18.426393	54.691556	18.425256	54.693084	18.419877
Michał Korthals	8	19	19_44/2_w2	189/18/1684	19_44/2	2018-07-11	2018-07-30	Epsilon-HCH	mg/kg	0.015	p.0,015		-	1	Eurofins	SFBA0-7	3.51	54.695007	18.422677	54.693555	18.426393	54.691556	18.425256	54.693084	18.419877
Michał Korthals	8	19	19_44/2_w2	189/18/1684	19_44/2	2018-07-11	2018-07-30	Lindan(gamma-HCH)	mg/kg	0.015	p.0,015		-	1	Eurofins	SFBA0-7	3.51	54.695007	18.422677	54.693555	18.426393	54.691556	18.425256	54.693084	18.419877
Michał Korthals	8	19	19_44/2_w2	189/18/1684	19_44/2	2018-07-11	2018-07-30	Heptachlor	mg/kg	0.015	p.0,015		-	1	Eurofins	SFBA0-7	3.51	54.695007	18.422677	54.693555	18.426393	54.691556	18.425256	54.693084	18.419877
Michał Korthals	8	19	19_44/2_w2	189/18/1684	19_44/2	2018-07-11	2018-07-30	Heptachlor(suma)	mg/kg	0.015	p.0,015		-	1	Eurofins	SFBA0-7	3.51	54.695007	18.422677	54.693555	18.426393	54.691556	18.425256	54.693084	18.419877
Michał Korthals	8	19	19_44/2_w2	189/18/1684	19_44/2	2018-07-11	2018-07-30	Heptahlor-trans-epoksyd	mg/kg	0.015	p.0,015		-	1	Eurofins	SFBA0-7	3.51	54.695007	18.422677	54.693555	18.426393	54.691556	18.425256	54.693084	18.419877
Michał Korthals	8	19	19_44/2_w2	189/18/1684	19_44/2	2018-07-11	2018-07-30	Heptahlor-cis-epoksyd	mg/kg	0.015	p.0,015		-	1	Eurofins	SFBA0-7	3.51	54.695007	18.422677	54.693555	18.426393	54.691556	18.425256	54.693084	18.419877
Michał Korthals	8	19	19_44/2_w2	189/18/1684	19_44/2	2018-07-11	2018-07-30	Heptenofos	mg/kg	0.03	p.0,03		-	1	Eurofins	SFBA0-7	3.51	54.695007	18.422677	54.693555	18.426393	54.691556	18.425256	54.693084	18.419877
Michał Korthals	8	19	19_44/2_w2	189/18/1684	19_44/2	2018-07-11	2018-07-30	Heksachlorobenzen(HCB)	mg/kg	0.015	p.0,015		-	1	Eurofins	SFBA0-7	3.51	54.695007	18.422677	54.693555	18.426393	54.691556	18.425256	54.693084	18.419877
Michał Korthals	8	19	19_44/2_w2	189/18/1684	19_44/2	2018-07-11	2018-07-30	Heksakonazol	mg/kg	0.045	p.0,045		-	1	Eurofins	SFBA0-7	3.51	54.695007	18.422677	54.693555	18.426393	54.691556	18.425256	54.693084	18.419877
Michał Korthals	8	19	19_44/2_w2	189/18/1684	19_44/2	2018-07-11	2018-07-30	Indanofan	mg/kg	0.06	p.0,06		-	1	Eurofins	SFBA0-7	3.51	54.695007	18.422677	54.693555	18.426393	54.691556	18.425256	54.693084	18.419877
Michał Korthals	8	19	19_44/2_w2	189/18/1684	19_44/2	2018-07-11	2018-07-30	Indoksakarb	mg/kg	0.015	p.0,015		-	1	Eurofins	SFBA0-7	3.51	54.695007	18.422677	54.693555	18.426393	54.691556	18.425256	54.693084	18.419877
Michał Korthals	8	19	19_44/2_w2	189/18/1684	19_44/2	2018-07-11	2018-07-30	Jodofenfos	mg/kg	0.015	p.0,015		-	1	Eurofins	SFBA0-7	3.51	54.695007	18.422677	54.693555	18.426393	54.691556	18.425256	54.693084	18.419877
Michał Korthals	8	19	19_44/2_w2	189/18/1684	19_44/2	2018-07-11	2018-07-30	Ioxynil-Octanoate	mg/kg	0.03	p.0,03		-	1	Eurofins	SFBA0-7	3.51	54.695007	18.422677	54.693555	18.426393	54.691556	18.425256	54.693084	18.419877
Michał Korthals	8	19	19_44/2_w2	189/18/1684	19_44/2	2018-07-11	2018-07-30	Iprobenfos	mg/kg	0.03	p.0,03		-	1	Eurofins	SFBA0-7	3.51	54.695007	18.422677	54.693555	18.426393	54.691556	18.425256	54.693084	18.419877
Michał Korthals	8	19	19_44/2_w2	189/18/1684	19_44/2	2018-07-11	2018-07-30	Iprodion	mg/kg	0.03	p.0,03		-	1	Eurofins	SFBA0-7	3.51	54.695007	18.422677	54.693555	18.426393	54.691556	18.425256	54.693084	18.419877
Michał Korthals	8	19	19_44/2_w2	189/18/1684	19_44/2	2018-07-11	2018-07-30	Isazophos	mg/kg	0.03	p.0,03		-	1	Eurofins	SFBA0-7	3.51	54.695007	18.422677	54.693555	18.426393	54.691556	18.425256	54.693084	18.419877
Michał Korthals	8	19	19_44/2_w2	189/18/1684	19_44/2	2018-07-11	2018-07-30	Isobenzan	mg/kg	0.015	p.0,015		-	1	Eurofins	SFBA0-7	3.51	54.695007	18.422677	54.693555	18.426393	54.691556	18.425256	54.693084	18.419877
Michał Korthals	8	19	19_44/2_w2	189/18/1684	19_44/2	2018-07-11	2018-07-30	Isocarbofos	mg/kg	0.03	p.0,03		-	1	Eurofins	SFBA0-7	3.51	54.695007	18.422677	54.693555	18.426393	54.691556	18.425256	54.693084	18.419877
Michał Korthals	8	19	19_44/2_w2	189/18/1684	19_44/2	2018-07-11	2018-07-30	Izodryna	mg/kg	0.015	p.0,015		-	1	Eurofins	SFBA0-7	3.51	54.695007	18.422677	54.693555	18.426393	54.691556	18.425256	54.693084	18.419877
Michał Korthals	8	19	19_44/2_w2	189/18/1684	19_44/2	2018-07-11	2018-07-30	Izofenfos	mg/kg	0.015	p.0,015		-	1	Eurofins	SFBA0-7	3.51	54.695007	18.422677	54.693555	18.426393	54.691556	18.425256	54.693084	18.419877
Michał Korthals	8	19	19_44/2_w2	189/18/1684	19_44/2	2018-07-11	2018-07-30	Isofenphos-Methyl	mg/kg	0.015	p.0,015		-	1	Eurofins	SFBA0-7	3.51	54.695007	18.422677	54.693555	18.426393	54.691556	18.425256	54.693084	18.419877
Michał Korthals	8	19	19_44/2_w2	189/18/1684	19_44/2	2018-07-11	2018-07-30	Isomethiozin	mg/kg	0.03	p.0,03		-	1	Eurofins	SFBA0-7	3.51	54.695007	18.422677	54.693555	18.426393	54.691556	18.425256	54.693084	18.419877
Michał Korthals	8	19	19_44/2_w2	189/18/1684	19_44/2	2018-07-11	2018-07-30	Isopropalin	mg/kg	0.015	p.0,015		-	1	Eurofins	SFBA0-7	3.51	54.695007	18.422677	54.693555	18.426393	54.691556	18.425256	54.693084	18.419877
Michał Korthals	8	19	19_44/2_w2	189/18/1684	19_44/2	2018-07-11	2018-07-30	Isoxadifen-ethyl	mg/kg	0.03	p.0,03		-	1	Eurofins	SFBA0-7	3.51	54.695007	18.422677	54.693555	18.426393	54.691556	18.425256	54.693084	18.419877
Michał Korthals	8	19	19_44/2_w2	189/18/1684	19_44/2	2018-07-11	2018-07-30	Krezoksym-metylu	mg/kg	0.015	p.0,015		-	1	Eurofins	SFBA0-7	3.51	54.695007	18.422677	54.693555	18.426393	54.691556	18.425256	54.693084	18.419877
Michał Korthals	8	19	19_44/2_w2	189/18/1684	19_44/2	2018-07-11	2018-07-30	Lactofen	mg/kg	0.03	p.0,03		-	1	Eurofins	SFBA0-7	3.51	54.695007	18.422677	54.693555	18.426393	54.691556	18.425256	54.693084	18.419877
Michał Korthals	8	19	19_44/2_w2	189/18/1684	19_44/2	2018-07-11	2018-07-30	Leptophos	mg/kg	0.03	p.0,03		-	1	Eurofins	SFBA0-7	3.51	54.695007	18.422677	54.693555	18.426393	54.691556	18.425256	54.693084	18.419877
Michał Korthals	8	19	19_44/2_w2	189/18/1684	19_44/2	2018-07-11	2018-07-30	Lufenuron	mg/kg	0.036	p.0,03600		-	1	Eurofins	SFBA0-7	3.51	54.695007	18.422677	54.693555	18.426393	54.691556	18.425256	54.693084	18.419877
Michał Korthals	8	19	19_44/2_w2	189/18/1684	19_44/2	2018-07-11	2018-07-30	Malaokson	mg/kg	0.015	p.0,015		-	1	Eurofins	SFBA0-7	3.51	54.695007	18.422677	54.693555	18.426393	54.691556	18.425256	54.693084	18.419877
Michał Korthals	8	19	19_44/2_w2	189/18/1684	19_44/2	2018-07-11	2018-07-30	Malation	mg/kg	0.03	p.0,03		-	1	Eurofins	SFBA0-7	3.51	54.695007	18.422677	54.693555	18.426393	54.691556	18.425256	54.693084	18.419877
Michał Korthals	8	19	19_44/2_w2	189/18/1684	19_44/2	2018-07-11	2018-07-30	Mekarbam	mg/kg	0.03	p.0,03		-	1	Eurofins	SFBA0-7	3.51	54.695007	18.422677	54.693555	18.426393	54.691556	18.425256	54.693084	18.419877
Michał Korthals	8	19	19_44/2_w2	189/18/1684	19_44/2	2018-07-11	2018-07-30	Mephosfolan	mg/kg	0.03	p.0,03		-	1	Eurofins	SFBA0-7	3.51	54.695007	18.422677	54.693555	18.426393	54.691556	18.425256	54.693084	18.419877
Michał Korthals	8	19	19_44/2_w2	189/18/1684	19_44/2	2018-07-11	2018-07-30	Merphos	mg/kg	0.03	p.0,03		-	1	Eurofins	SFBA0-7	3.51	54.695007	18.422677	54.693555	18.426393	54.691556	18.425256	54.693084	18.419877
Michał Korthals	8	19	19_44/2_w2	189/18/1684	19_44/2	2018-07-11	2018-07-30	Metazachlor	mg/kg	0.03	p.0,03		-	1	Eurofins	SFBA0-7	3.51	54.695007	18.422677	54.693555	18.426393	54.691556	18.425256	54.693084	18.419877
Michał Korthals	8	19	19_44/2_w2	189/18/1684	19_44/2	2018-07-11	2018-07-30	Metakrifos	mg/kg	0.15	p.0,15		-	1	Eurofins	SFBA0-7	3.51	54.695007	18.422677	54.693555	18.426393	54.691556	18.425256	54.693084	18.419877
Michał Korthals	8	19	19_44/2_w2	189/18/1684	19_44/2	2018-07-11	2018-07-30	Metydation	mg/kg	0.036	p.0,03600		-	1	Eurofins	SFBA0-7	3.51	54.695007	18.422677	54.693555	18.426393	54.691556	18.425256	54.693084	18.419877
Michał Korthals	8	19	19_44/2_w2	189/18/1684	19_44/2	2018-07-11	2018-07-30	Metoksychlor	mg/kg	0.015	p.0,015		-	1	Eurofins	SFBA0-7	3.51	54.695007	18.422677	54.693555	18.426393	54.691556	18.425256	54.693084	18.419877
Michał Korthals	8	19	19_44/2_w2	189/18/1684	19_44/2	2018-07-11	2018-07-30	Metolachlor	mg/kg	0.15	p.0,15		-	1	Eurofins	SFBA0-7	3.51	54.695007	18.422677	54.693555	18.426393	54.691556	18.425256	54.693084	18.419877
Michał Korthals	8	19	19_44/2_w2	189/18/1684	19_44/2	2018-07-11	2018-07-30	Metrafenon	mg/kg	0.15	p.0,15		-	1	Eurofins	SFBA0-7	3.51	54.695007	18.422677	54.693555	18.426393	54.691556	18.425256	54.693084	18.419877
Michał Korthals	8	19	19_44/2_w2	189/18/1684	19_44/2	2018-07-11	2018-07-30	Metribuzyn	mg/kg	0.03	p.0,03		-	1	Eurofins	SFBA0-7	3.51	54.695007	18.422677	54.693555	18.426393	54.691556	18.425256	54.693084	18.419877
Michał Korthals	8	19	19_44/2_w2	189/18/1684	19_44/2	2018-07-11	2018-07-30	Mevinfos	mg/kg	0.03	p.0,03		-	1	Eurofins	SFBA0-7	3.51	54.695007	18.422677	54.693555	18.426393	54.691556	18.425256	54.693084	18.419877
Michał Korthals	8	19	19_44/2_w2	189/18/1684	19_44/2	2018-07-11	2018-07-30	Mirex	mg/kg	0.015	p.0,015		-	1	Eurofins	SFBA0-7	3.51	54.695007	18.422677	54.693555	18.426393	54.691556	18.425256	54.693084	18.419877
Michał Korthals	8	19	19_44/2_w2	189/18/1684	19_44/2	2018-07-11	2018-07-30	Molinate	mg/kg	0.045	p.0,045		-	1	Eurofins	SFBA0-7	3.51	54.695007	18.422677	54.693555	18.426393	54.691556	18.425256	54.693084	18.419877
Michał Korthals	8	19	19_44/2_w2	189/18/1684	19_44/2	2018-07-11	2018-07-30	Myklobutanil	mg/kg	0.015	p.0,015		-	1	Eurofins	SFBA0-7	3.51	54.695007	18.422677	54.693555	18.426393	54.691556	18.425256	54.693084	18.419877
Michał Korthals	8	19	19_44/2_w2	189/18/1684	19_44/2	2018-07-11	2018-07-30	Nitralin	mg/kg	0.03	p.0,03		-	1	Eurofins	SFBA0-7	3.51	54.695007	18.422677	54.693555	18.426393	54.691556	18.425256	54.693084	18.419877
Michał Korthals	8	19	19_44/2_w2	189/18/1684	19_44/2	2018-07-11	2018-07-30	Nitrapyrin	mg/kg	0.06	p.0,06		-	1	Eurofins	SFBA0-7	3.51	54.695007	18.422677	54.693555	18.426393	54.691556	18.425256	54.693084	18.419877
Michał Korthals	8	19	19_44/2_w2	189/18/1684	19_44/2	2018-07-11	2018-07-30	Nitrofen	mg/kg	0.03	p.0,03		-	1	Eurofins	SFBA0-7	3.51	54.695007	18.422677	54.693555	18.426393	54.691556	18.425256	54.693084	18.419877
Michał Korthals	8	19	19_44/2_w2	189/18/1684	19_44/2	2018-07-11	2018-07-30	Nitrothal-isopropyl	mg/kg	0.03	p.0,03		-	1	Eurofins	SFBA0-7	3.51	54.695007	18.422677	54.693555	18.426393	54.691556	18.425256	54.693084	18.419877
Michał Korthals	8	19	19_44/2_w2	189/18/1684	19_44/2	2018-07-11	2018-07-30	Norflurazon	mg/kg	0.15	p.0,15		-	1	Eurofins	SFBA0-7	3.51	54.695007	18.422677	54.693555	18.426393	54.691556	18.425256	54.693084	18.419877
Michał Korthals	8	19	19_44/2_w2	189/18/1684	19_44/2	2018-07-11	2018-07-30	Nuarimol	mg/kg	0.03	p.0,03		-	1	Eurofins	SFBA0-7	3.51	54.695007	18.422677	54.693555	18.426393	54.691556	18.425256	54.693084	18.419877
Michał Korthals	8	19	19_44/2_w2	189/18/1684	19_44/2	2018-07-11	2018-07-30	Ometoat	mg/kg	0.3	p.0,3		-	1	Eurofins	SFBA0-7	3.51	54.695007	18.422677	54.693555	18.426393	54.691556	18.425256	54.693084	18.419877
Michał Korthals	8	19	19_44/2_w2	189/18/1684	19_44/2	2018-07-11	2018-07-30	Oxadiazon	mg/kg	0.015	p.0,015		-	1	Eurofins	SFBA0-7	3.51	54.695007	18.422677	54.693555	18.426393	54.691556	18.425256	54.693084	18.419877
Michał Korthals	8	19	19_44/2_w2	189/18/1684	19_44/2	2018-07-11	2018-07-30	Oxydemeton-methyl	mg/kg	0.03	p.0,03		-	1	Eurofins	SFBA0-7	3.51	54.695007	18.422677	54.693555	18.426393	54.691556	18.425256	54.693084	18.419877
Michał Korthals	8	19	19_44/2_w2	189/18/1684	19_44/2	2018-07-11	2018-07-30	Oksyfluoroten	mg/kg	0.03	p.0,03		-	1	Eurofins	SFBA0-7	3.51	54.695007	18.422677	54.693555	18.426393	54.691556	18.425256	54.693084	18.419877
Michał Korthals	8	19	19_44/2_w2	189/18/1684	19_44/2	2018-07-11	2018-07-30	Paklobutrazol	mg/kg	0.12	p.0,12		-	1	Eurofins	SFBA0-7	3.51	54.695007	18.422677	54.693555	18.426393	54.691556	18.425256	54.693084	18.419877
Michał Korthals	8	19	19_44/2_w2	189/18/1684	19_44/2	2018-07-11	2018-07-30	Paraoxon-ethyl	mg/kg	0.045	p.0,045		-	1	Eurofins	SFBA0-7	3.51	54.695007	18.422677	54.693555	18.426393	54.691556	18.425256	54.693084	18.419877
Michał Korthals	8	19	19_44/2_w2	189/18/1684	19_44/2	2018-07-11	2018-07-30	Paraokson metylowy	mg/kg	0.045	p.0,045		-	1	Eurofins	SFBA0-7	3.51	54.695007	18.422677	54.693555	18.426393	54.691556	18.425256	54.693084	18.419877
Michał Korthals	8	19	19_44/2_w2	189/18/1684	19_44/2	2018-07-11	2018-07-30	Paration	mg/kg	0.015	p.0,015		-	1	Eurofins	SFBA0-7	3.51	54.695007	18.422677	54.693555	18.426393	54.691556	18.425256	54.693084	18.419877
Michał Korthals	8	19	19_44/2_w2	189/18/1684	19_44/2	2018-07-11	2018-07-30	Paration metylu	mg/kg	0.015	p.0,015		-	1	Eurofins	SFBA0-7	3.51	54.695007	18.422677	54.693555	18.426393	54.691556	18.425256	54.693084	18.419877
Michał Korthals	8	19	19_44/2_w2	189/18/1684	19_44/2	2018-07-11	2018-07-30	Paration metylu/Paraokson metylu (suma)	mg/kg	0.015	p.0,015		-	1	Eurofins	SFBA0-7	3.51	54.695007	18.422677	54.693555	18.426393	54.691556	18.425256	54.693084	18.419877
[truncated: 751 more rows]
