# Supplementary material for: The impact of pesticides used at the agricultural land of the Puck commune on the environment of the Puck Bay
Source: PeerJ. 2020 Mar 19;8:e8789. doi: 10.7717/peerj.8789 (PMC7085897; doi:10.7717/peerj.8789)
Supplement: Supplemental Information 4 [file peerj-08-8789-s004.xlsx]

## Sheet: Arkusz1
Sample number	Latitude	Longitude	Laboratory code	Data of sampling	Parameter	Unit	LOQ	Result	Uncertainty	Result < LOQ	Analyst	Analytical method
8	18.4409	54.7011	227/18/2040	2018-08-21	α - HCH	µg/dm3	0.002	p.0,002	-	1	M. Wojtkiewicz	PN-EN 16693:2015-12
8	18.4409	54.7011	227/18/2040	2018-08-21	β - HCH	µg/dm3	0.002	p.0,002	-	1	M. Wojtkiewicz	PN-EN 16693:2015-12
8	18.4409	54.7011	227/18/2040	2018-08-21	γ - HCH	µg/dm3	0.002	p.0,002	-	1	M. Wojtkiewicz	PN-EN 16693:2015-12
8	18.4409	54.7011	227/18/2040	2018-08-21	δ - HCH	µg/dm3	0.002	p.0,002	-	1	M. Wojtkiewicz	PN-EN 16693:2015-12
8	18.4409	54.7011	227/18/2040	2018-08-21	Aldryna	µg/dm3	0.005	p.0,005	-	1	M. Wojtkiewicz	PN-EN 16693:2015-12
8	18.4409	54.7011	227/18/2040	2018-08-21	Izodryna	µg/dm3	0.005	p.0,005	-	1	M. Wojtkiewicz	PN-EN 16693:2015-12
8	18.4409	54.7011	227/18/2040	2018-08-21	Dieldryna	µg/dm3	0.005	p.0,005	-	1	M. Wojtkiewicz	PN-EN 16693:2015-12
8	18.4409	54.7011	227/18/2040	2018-08-21	Endryna	µg/dm3	0.005	p.0,005	-	1	M. Wojtkiewicz	PN-EN 16693:2015-12
8	18.4409	54.7011	227/18/2040	2018-08-21	DDE	µg/dm3	0.01	p.0,01	-	1	M. Wojtkiewicz	PN-EN 16693:2015-12
8	18.4409	54.7011	227/18/2040	2018-08-21	DDD	µg/dm3	0.01	p.0,01	-	1	M. Wojtkiewicz	PN-EN 16693:2015-12
8	18.4409	54.7011	227/18/2040	2018-08-21	DDT	µg/dm3	0.01	p.0,01	-	1	M. Wojtkiewicz	PN-EN 16693:2015-12
8	18.4409	54.7011	227/18/2040	2018-08-21	2,4,5-T-Methylester	µg/dm3	0.1	p.0,1	-	1	Eurofins	SFBA0-7
8	18.4409	54.7011	227/18/2040	2018-08-21	2,4-D-Methylester	µg/dm3	0.1	p.0,1	-	1	Eurofins	SFBA0-7
8	18.4409	54.7011	227/18/2040	2018-08-21	Acetochlor	µg/dm3	0.1	p.0,1	-	1	Eurofins	SFBA0-7
8	18.4409	54.7011	227/18/2040	2018-08-21	Aclonifen	µg/dm3	0.1	p.0,1	-	1	Eurofins	SFBA0-7
8	18.4409	54.7011	227/18/2040	2018-08-21	Akrynatryna	µg/dm3	0.1	p.0,1	-	1	Eurofins	SFBA0-7
8	18.4409	54.7011	227/18/2040	2018-08-21	Alachlor	µg/dm3	0.1	p.0,1	-	1	Eurofins	SFBA0-7
8	18.4409	54.7011	227/18/2040	2018-08-21	Aldryna	µg/dm3	0.03	p.0,03	-	1	Eurofins	SFBA0-7
8	18.4409	54.7011	227/18/2040	2018-08-21	Aldryna+Dieldryna	µg/dm3	0.1	p.0,1	-	1	Eurofins	SFBA0-7
8	18.4409	54.7011	227/18/2040	2018-08-21	Alletryna	µg/dm3	0.1	p.0,1	-	1	Eurofins	SFBA0-7
8	18.4409	54.7011	227/18/2040	2018-08-21	Amidithion	µg/dm3	0.1	p.0,1	-	1	Eurofins	SFBA0-7
8	18.4409	54.7011	227/18/2040	2018-08-21	Antrachinon	µg/dm3	0.1	p.0,1	-	1	Eurofins	SFBA0-7
8	18.4409	54.7011	227/18/2040	2018-08-21	Atrazyna	µg/dm3	0.1	p.0,1	-	1	Eurofins	SFBA0-7
8	18.4409	54.7011	227/18/2040	2018-08-21	Azakonazol	µg/dm3	0.1	p.0,1	-	1	Eurofins	SFBA0-7
8	18.4409	54.7011	227/18/2040	2018-08-21	Azynofos etylowy	µg/dm3	0.1	p.0,1	-	1	Eurofins	SFBA0-7
8	18.4409	54.7011	227/18/2040	2018-08-21	Azynofos metylowy	µg/dm3	0.1	p.0,1	-	1	Eurofins	SFBA0-7
8	18.4409	54.7011	227/18/2040	2018-08-21	Azoksystrobina	µg/dm3	0.1	p.0,1	-	1	Eurofins	SFBA0-7
8	18.4409	54.7011	227/18/2040	2018-08-21	Benfluralin	µg/dm3	0.1	p.0,1	-	1	Eurofins	SFBA0-7
8	18.4409	54.7011	227/18/2040	2018-08-21	Benoxacor	µg/dm3	0.1	p.0,1	-	1	Eurofins	SFBA0-7
8	18.4409	54.7011	227/18/2040	2018-08-21	Benzoylprop-ethyl	µg/dm3	0.1	p.0,1	-	1	Eurofins	SFBA0-7
8	18.4409	54.7011	227/18/2040	2018-08-21	Biofenox	µg/dm3	0.1	p.0,1	-	1	Eurofins	SFBA0-7
8	18.4409	54.7011	227/18/2040	2018-08-21	Binapacryl	µg/dm3	0.1	p.0,1	-	1	Eurofins	SFBA0-7
8	18.4409	54.7011	227/18/2040	2018-08-21	Bifentryna	µg/dm3	0.1	p.0,1	-	1	Eurofins	SFBA0-7
8	18.4409	54.7011	227/18/2040	2018-08-21	Bitertanol	µg/dm3	0.1	p.0,1	-	1	Eurofins	SFBA0-7
8	18.4409	54.7011	227/18/2040	2018-08-21	Boskalid	µg/dm3	0.1	p.0,1	-	1	Eurofins	SFBA0-7
8	18.4409	54.7011	227/18/2040	2018-08-21	Bromofenvinphos	µg/dm3	0.1	p.0,1	-	1	Eurofins	SFBA0-7
8	18.4409	54.7011	227/18/2040	2018-08-21	Bromocyclen	µg/dm3	0.1	p.0,1	-	1	Eurofins	SFBA0-7
8	18.4409	54.7011	227/18/2040	2018-08-21	Bromofos metylowy	µg/dm3	0.1	p.0,1	-	1	Eurofins	SFBA0-7
8	18.4409	54.7011	227/18/2040	2018-08-21	Bromofos etylowy	µg/dm3	0.1	p.0,1	-	1	Eurofins	SFBA0-7
8	18.4409	54.7011	227/18/2040	2018-08-21	Bromopropylat	µg/dm3	0.1	p.0,1	-	1	Eurofins	SFBA0-7
8	18.4409	54.7011	227/18/2040	2018-08-21	Buprofezyna	µg/dm3	0.1	p.0,1	-	1	Eurofins	SFBA0-7
8	18.4409	54.7011	227/18/2040	2018-08-21	Butachlor	µg/dm3	0.1	p.0,1	-	1	Eurofins	SFBA0-7
8	18.4409	54.7011	227/18/2040	2018-08-21	Butamifos	µg/dm3	0.1	p.0,1	-	1	Eurofins	SFBA0-7
8	18.4409	54.7011	227/18/2040	2018-08-21	Butralin	µg/dm3	0.1	p.0,1	-	1	Eurofins	SFBA0-7
8	18.4409	54.7011	227/18/2040	2018-08-21	Kadusafos	µg/dm3	0.1	p.0,1	-	1	Eurofins	SFBA0-7
8	18.4409	54.7011	227/18/2040	2018-08-21	Kaptafol	µg/dm3	0.1	p.0,1	-	1	Eurofins	SFBA0-7
8	18.4409	54.7011	227/18/2040	2018-08-21	Kaptan	µg/dm3	0.1	p.0,1	-	1	Eurofins	SFBA0-7
8	18.4409	54.7011	227/18/2040	2018-08-21	Karbofenotion	µg/dm3	0.1	p.0,1	-	1	Eurofins	SFBA0-7
8	18.4409	54.7011	227/18/2040	2018-08-21	Carbophenothion-methyl	µg/dm3	0.1	p.0,1	-	1	Eurofins	SFBA0-7
8	18.4409	54.7011	227/18/2040	2018-08-21	Carfentrazone-ethyl	µg/dm3	0.1	p.0,1	-	1	Eurofins	SFBA0-7
8	18.4409	54.7011	227/18/2040	2018-08-21	Chinometionat	µg/dm3	0.1	p.0,1	-	1	Eurofins	SFBA0-7
8	18.4409	54.7011	227/18/2040	2018-08-21	Chlorbenzyd	µg/dm3	0.1	p.0,1	-	1	Eurofins	SFBA0-7
8	18.4409	54.7011	227/18/2040	2018-08-21	Chlordane (total)	µg/dm3	0.1	p.0,1	-	1	Eurofins	SFBA0-7
8	18.4409	54.7011	227/18/2040	2018-08-21	Chlordan,cis-	µg/dm3	0.1	p.0,1	-	1	Eurofins	SFBA0-7
8	18.4409	54.7011	227/18/2040	2018-08-21	Chlordan,oxy-	µg/dm3	0.1	p.0,1	-	1	Eurofins	SFBA0-7
8	18.4409	54.7011	227/18/2040	2018-08-21	Chlordan,gamma/trans-	µg/dm3	0.1	p.0,1	-	1	Eurofins	SFBA0-7
8	18.4409	54.7011	227/18/2040	2018-08-21	Chlordecon	µg/dm3	0.1	p.0,1	-	1	Eurofins	SFBA0-7
8	18.4409	54.7011	227/18/2040	2018-08-21	Chlorethoksyfos	µg/dm3	0.1	p.0,1	-	1	Eurofins	SFBA0-7
8	18.4409	54.7011	227/18/2040	2018-08-21	Chlorfenapyr	µg/dm3	0.1	p.0,1	-	1	Eurofins	SFBA0-7
8	18.4409	54.7011	227/18/2040	2018-08-21	Chlorfenprop-methyl	µg/dm3	0.1	p.0,1	-	1	Eurofins	SFBA0-7
8	18.4409	54.7011	227/18/2040	2018-08-21	Chlorfenson	µg/dm3	0.1	p.0,1	-	1	Eurofins	SFBA0-7
8	18.4409	54.7011	227/18/2040	2018-08-21	Chlorfenwinfos	µg/dm3	0.1	p.0,1	-	1	Eurofins	SFBA0-7
8	18.4409	54.7011	227/18/2040	2018-08-21	Chloridazon	µg/dm3	0.1	p.0,1	-	1	Eurofins	SFBA0-7
8	18.4409	54.7011	227/18/2040	2018-08-21	Chlormephos	µg/dm3	0.1	p.0,1	-	1	Eurofins	SFBA0-7
8	18.4409	54.7011	227/18/2040	2018-08-21	Chlorobenzylat	µg/dm3	0.1	p.0,1	-	1	Eurofins	SFBA0-7
8	18.4409	54.7011	227/18/2040	2018-08-21	Chloroneb	µg/dm3	0.1	p.0,1	-	1	Eurofins	SFBA0-7
8	18.4409	54.7011	227/18/2040	2018-08-21	Chloropropylat	µg/dm3	0.1	p.0,1	-	1	Eurofins	SFBA0-7
8	18.4409	54.7011	227/18/2040	2018-08-21	Chlorotalonil	µg/dm3	0.1	p.0,1	-	1	Eurofins	SFBA0-7
8	18.4409	54.7011	227/18/2040	2018-08-21	Chlorpiryfos etylowy	µg/dm3	0.1	p.0,1	-	1	Eurofins	SFBA0-7
8	18.4409	54.7011	227/18/2040	2018-08-21	Chlorpiryfos metylowy	µg/dm3	0.1	p.0,1	-	1	Eurofins	SFBA0-7
8	18.4409	54.7011	227/18/2040	2018-08-21	Chlorthal-dimethyl	µg/dm3	0.1	p.0,1	-	1	Eurofins	SFBA0-7
8	18.4409	54.7011	227/18/2040	2018-08-21	Chlorotion	µg/dm3	0.1	p.0,1	-	1	Eurofins	SFBA0-7
8	18.4409	54.7011	227/18/2040	2018-08-21	Chlortiofos	µg/dm3	0.1	p.0,1	-	1	Eurofins	SFBA0-7
8	18.4409	54.7011	227/18/2040	2018-08-21	Chlozolinate	µg/dm3	0.1	p.0,1	-	1	Eurofins	SFBA0-7
8	18.4409	54.7011	227/18/2040	2018-08-21	Cinidon-ethyl	µg/dm3	0.1	p.0,1	-	1	Eurofins	SFBA0-7
8	18.4409	54.7011	227/18/2040	2018-08-21	Clodinafop-propargyl	µg/dm3	0.1	p.0,1	-	1	Eurofins	SFBA0-7
8	18.4409	54.7011	227/18/2040	2018-08-21	Kumafos	µg/dm3	0.1	p.0,1	-	1	Eurofins	SFBA0-7
8	18.4409	54.7011	227/18/2040	2018-08-21	Crotoxyphos	µg/dm3	0.1	p.0,1	-	1	Eurofins	SFBA0-7
8	18.4409	54.7011	227/18/2040	2018-08-21	Cyjanofenfos	µg/dm3	0.1	p.0,1	-	1	Eurofins	SFBA0-7
8	18.4409	54.7011	227/18/2040	2018-08-21	Cyanophos	µg/dm3	0.1	p.0,1	-	1	Eurofins	SFBA0-7
8	18.4409	54.7011	227/18/2040	2018-08-21	Cyflutryna	µg/dm3	0.1	p.0,1	-	1	Eurofins	SFBA0-7
8	18.4409	54.7011	227/18/2040	2018-08-21	lambda-Cyhalotryna	µg/dm3	0.1	p.0,1	-	1	Eurofins	SFBA0-7
8	18.4409	54.7011	227/18/2040	2018-08-21	Cypermetryna	µg/dm3	0.1	p.0,1	-	1	Eurofins	SFBA0-7
8	18.4409	54.7011	227/18/2040	2018-08-21	Cyphenothrin	µg/dm3	0.1	p.0,1	-	1	Eurofins	SFBA0-7
8	18.4409	54.7011	227/18/2040	2018-08-21	Cyprokonazol	µg/dm3	0.1	p.0,1	-	1	Eurofins	SFBA0-7
8	18.4409	54.7011	227/18/2040	2018-08-21	DDD-o,p	µg/dm3	0.1	p.0,1	-	1	Eurofins	SFBA0-7
8	18.4409	54.7011	227/18/2040	2018-08-21	DDE-o,p	µg/dm3	0.1	p.0,1	-	1	Eurofins	SFBA0-7
8	18.4409	54.7011	227/18/2040	2018-08-21	DDT(p,p'-DDT+o,p'-DDT+p.p'-DDE+p,p'-TDE)	µg/dm3	0.1	p.0,1	-	1	Eurofins	SFBA0-7
8	18.4409	54.7011	227/18/2040	2018-08-21	Deltametryna	µg/dm3	0.1	p.0,1	-	1	Eurofins	SFBA0-7
8	18.4409	54.7011	227/18/2040	2018-08-21	Dialifos	µg/dm3	0.1	p.0,1	-	1	Eurofins	SFBA0-7
8	18.4409	54.7011	227/18/2040	2018-08-21	Di-allate	µg/dm3	0.1	p.0,1	-	1	Eurofins	SFBA0-7
8	18.4409	54.7011	227/18/2040	2018-08-21	Diazynon	µg/dm3	0.05	p.0,05	-	1	Eurofins	SFBA0-7
8	18.4409	54.7011	227/18/2040	2018-08-21	4,4-Dibromobenzophenone	µg/dm3	0.1	p.0,1	-	1	Eurofins	SFBA0-7
8	18.4409	54.7011	227/18/2040	2018-08-21	Dicapthon	µg/dm3	0.1	p.0,1	-	1	Eurofins	SFBA0-7
8	18.4409	54.7011	227/18/2040	2018-08-21	Dichlobenil	µg/dm3	0.1	p.0,1	-	1	Eurofins	SFBA0-7
8	18.4409	54.7011	227/18/2040	2018-08-21	Dichlofention	µg/dm3	0.1	p.0,1	-	1	Eurofins	SFBA0-7
8	18.4409	54.7011	227/18/2040	2018-08-21	Dichlofluanid	µg/dm3	0.1	p.0,1	-	1	Eurofins	SFBA0-7
8	18.4409	54.7011	227/18/2040	2018-08-21	Dichloran	µg/dm3	0.1	p.0,1	-	1	Eurofins	SFBA0-7
8	18.4409	54.7011	227/18/2040	2018-08-21	Dichlorfos	µg/dm3	0.1	p.0,1	-	1	Eurofins	SFBA0-7
8	18.4409	54.7011	227/18/2040	2018-08-21	Diclofop-methyl	µg/dm3	0.1	p.0,1	-	1	Eurofins	SFBA0-7
8	18.4409	54.7011	227/18/2040	2018-08-21	Dikofol (suma)	µg/dm3	0.1	p.0,1	-	1	Eurofins	SFBA0-7
8	18.4409	54.7011	227/18/2040	2018-08-21	Dicofol,o,p-	µg/dm3	0.1	p.0,1	-	1	Eurofins	SFBA0-7
8	18.4409	54.7011	227/18/2040	2018-08-21	Dicofol,p,p--	µg/dm3	0.1	p.0,1	-	1	Eurofins	SFBA0-7
8	18.4409	54.7011	227/18/2040	2018-08-21	Dicrotophos	µg/dm3	0.1	p.0,1	-	1	Eurofins	SFBA0-7
8	18.4409	54.7011	227/18/2040	2018-08-21	Dieldryna	µg/dm3	0.03	p.0,03	-	1	Eurofins	SFBA0-7
8	18.4409	54.7011	227/18/2040	2018-08-21	Dienochlor	µg/dm3	0.1	p.0,1	-	1	Eurofins	SFBA0-7
8	18.4409	54.7011	227/18/2040	2018-08-21	Difenokonazol	µg/dm3	0.1	p.0,1	-	1	Eurofins	SFBA0-7
8	18.4409	54.7011	227/18/2040	2018-08-21	Diflufenican	µg/dm3	0.1	p.0,1	-	1	Eurofins	SFBA0-7
8	18.4409	54.7011	227/18/2040	2018-08-21	Dimefox	µg/dm3	0.1	p.0,1	-	1	Eurofins	SFBA0-7
8	18.4409	54.7011	227/18/2040	2018-08-21	Dimetrachlor	µg/dm3	0.1	p.0,1	-	1	Eurofins	SFBA0-7
8	18.4409	54.7011	227/18/2040	2018-08-21	Dimethipine	µg/dm3	0.1	p.0,1	-	1	Eurofins	SFBA0-7
8	18.4409	54.7011	227/18/2040	2018-08-21	Dimetoat	µg/dm3	0.1	p.0,1	-	1	Eurofins	SFBA0-7
8	18.4409	54.7011	227/18/2040	2018-08-21	Dimetomorf	µg/dm3	0.1	p.0,1	-	1	Eurofins	SFBA0-7
8	18.4409	54.7011	227/18/2040	2018-08-21	Dinikonazol	µg/dm3	0.1	p.0,1	-	1	Eurofins	SFBA0-7
8	18.4409	54.7011	227/18/2040	2018-08-21	Dinitramine	µg/dm3	0.1	p.0,1	-	1	Eurofins	SFBA0-7
8	18.4409	54.7011	227/18/2040	2018-08-21	Dinobuton	µg/dm3	0.1	p.0,1	-	1	Eurofins	SFBA0-7
8	18.4409	54.7011	227/18/2040	2018-08-21	Disulfoton	µg/dm3	0.1	p.0,1	-	1	Eurofins	SFBA0-7
8	18.4409	54.7011	227/18/2040	2018-08-21	Disulfoton-sulfon	µg/dm3	0.1	p.0,1	-	1	Eurofins	SFBA0-7
8	18.4409	54.7011	227/18/2040	2018-08-21	Ditalimfos	µg/dm3	0.1	p.0,1	-	1	Eurofins	SFBA0-7
8	18.4409	54.7011	227/18/2040	2018-08-21	Edifenphos	µg/dm3	0.1	p.0,1	-	1	Eurofins	SFBA0-7
8	18.4409	54.7011	227/18/2040	2018-08-21	Endosulfan (suma izomerów)	µg/dm3	0.1	p.0,1	-	1	Eurofins	SFBA0-7
8	18.4409	54.7011	227/18/2040	2018-08-21	alfa-Endosulfan	µg/dm3	0.1	p.0,1	-	1	Eurofins	SFBA0-7
8	18.4409	54.7011	227/18/2040	2018-08-21	Siarczan endosulfanu	µg/dm3	0.1	p.0,1	-	1	Eurofins	SFBA0-7
8	18.4409	54.7011	227/18/2040	2018-08-21	beta-Endosulfan	µg/dm3	0.1	p.0,1	-	1	Eurofins	SFBA0-7
8	18.4409	54.7011	227/18/2040	2018-08-21	Endryna	µg/dm3	0.1	p.0,1	-	1	Eurofins	SFBA0-7
8	18.4409	54.7011	227/18/2040	2018-08-21	Ketoendrin-delta	µg/dm3	0.1	p.0,1	-	1	Eurofins	SFBA0-7
8	18.4409	54.7011	227/18/2040	2018-08-21	EPN	µg/dm3	0.1	p.0,1	-	1	Eurofins	SFBA0-7
8	18.4409	54.7011	227/18/2040	2018-08-21	Epoksykonazol	µg/dm3	0.1	p.0,1	-	1	Eurofins	SFBA0-7
8	18.4409	54.7011	227/18/2040	2018-08-21	Etaconazole	µg/dm3	0.1	p.0,1	-	1	Eurofins	SFBA0-7
8	18.4409	54.7011	227/18/2040	2018-08-21	Ethalfluralin	µg/dm3	0.1	p.0,1	-	1	Eurofins	SFBA0-7
8	18.4409	54.7011	227/18/2040	2018-08-21	Etion	µg/dm3	0.1	p.0,1	-	1	Eurofins	SFBA0-7
8	18.4409	54.7011	227/18/2040	2018-08-21	Ethiprol	µg/dm3	0.1	p.0,1	-	1	Eurofins	SFBA0-7
8	18.4409	54.7011	227/18/2040	2018-08-21	Etofumesat	µg/dm3	0.1	p.0,1	-	1	Eurofins	SFBA0-7
8	18.4409	54.7011	227/18/2040	2018-08-21	Etoprofos	µg/dm3	0.1	p.0,1	-	1	Eurofins	SFBA0-7
8	18.4409	54.7011	227/18/2040	2018-08-21	Etridiazole	µg/dm3	0.1	p.0,1	-	1	Eurofins	SFBA0-7
8	18.4409	54.7011	227/18/2040	2018-08-21	Etrimfos	µg/dm3	0.1	p.0,1	-	1	Eurofins	SFBA0-7
8	18.4409	54.7011	227/18/2040	2018-08-21	Famophos	µg/dm3	0.1	p.0,1	-	1	Eurofins	SFBA0-7
8	18.4409	54.7011	227/18/2040	2018-08-21	Famoksadon	µg/dm3	0.1	p.0,1	-	1	Eurofins	SFBA0-7
8	18.4409	54.7011	227/18/2040	2018-08-21	Fenamidon	µg/dm3	0.1	p.0,1	-	1	Eurofins	SFBA0-7
8	18.4409	54.7011	227/18/2040	2018-08-21	Fenamifos (suma izomerów)	µg/dm3	0.1	p.0,1	-	1	Eurofins	SFBA0-7
8	18.4409	54.7011	227/18/2040	2018-08-21	Fenarimol	µg/dm3	0.1	p.0,1	-	1	Eurofins	SFBA0-7
8	18.4409	54.7011	227/18/2040	2018-08-21	Fenbukonazol	µg/dm3	0.1	p.0,1	-	1	Eurofins	SFBA0-7
8	18.4409	54.7011	227/18/2040	2018-08-21	Fenchlorazole	µg/dm3	0.1	p.0,1	-	1	Eurofins	SFBA0-7
8	18.4409	54.7011	227/18/2040	2018-08-21	Fenchlorofos	µg/dm3	0.1	p.0,1	-	1	Eurofins	SFBA0-7
8	18.4409	54.7011	227/18/2040	2018-08-21	Fenfluthrine	µg/dm3	0.1	p.0,1	-	1	Eurofins	SFBA0-7
8	18.4409	54.7011	227/18/2040	2018-08-21	Fenheksamid	µg/dm3	0.1	p.0,1	-	1	Eurofins	SFBA0-7
8	18.4409	54.7011	227/18/2040	2018-08-21	Fenitrotion	µg/dm3	0.1	p.0,1	-	1	Eurofins	SFBA0-7
8	18.4409	54.7011	227/18/2040	2018-08-21	Fenoxaprop-ethyl	µg/dm3	0.1	p.0,1	-	1	Eurofins	SFBA0-7
8	18.4409	54.7011	227/18/2040	2018-08-21	Fenpiclonil	µg/dm3	0.1	p.0,1	-	1	Eurofins	SFBA0-7
8	18.4409	54.7011	227/18/2040	2018-08-21	Fenpropatryna	µg/dm3	0.1	p.0,1	-	1	Eurofins	SFBA0-7
8	18.4409	54.7011	227/18/2040	2018-08-21	Fenpropimorf	µg/dm3	0.1	p.0,1	-	1	Eurofins	SFBA0-7
8	18.4409	54.7011	227/18/2040	2018-08-21	Fenson	µg/dm3	0.1	p.0,1	-	1	Eurofins	SFBA0-7
8	18.4409	54.7011	227/18/2040	2018-08-21	Fensulfotion	µg/dm3	0.1	p.0,1	-	1	Eurofins	SFBA0-7
8	18.4409	54.7011	227/18/2040	2018-08-21	Fewalerat (suma izomer ów)	µg/dm3	0.1	p.0,1	-	1	Eurofins	SFBA0-7
8	18.4409	54.7011	227/18/2040	2018-08-21	Fenwalerat	µg/dm3	0.1	p.0,1	-	1	Eurofins	SFBA0-7
8	18.4409	54.7011	227/18/2040	2018-08-21	Fenvalerate(RS-/SR-Izomer)	µg/dm3	0.1	p.0,1	-	1	Eurofins	SFBA0-7
8	18.4409	54.7011	227/18/2040	2018-08-21	Fipronil	µg/dm3	0.1	p.0,1	-	1	Eurofins	SFBA0-7
8	18.4409	54.7011	227/18/2040	2018-08-21	Fipronil,desulfinyl-	µg/dm3	0.1	p.0,1	-	1	Eurofins	SFBA0-7
8	18.4409	54.7011	227/18/2040	2018-08-21	Fipranil+Sulfonmetab.MB46136(suma)	µg/dm3	0.1	p.0,1	-	1	Eurofins	SFBA0-7
8	18.4409	54.7011	227/18/2040	2018-08-21	Fipronil sulfid	µg/dm3	0.1	p.0,1	-	1	Eurofins	SFBA0-7
8	18.4409	54.7011	227/18/2040	2018-08-21	Fipronil sulfon	µg/dm3	0.1	p.0,1	-	1	Eurofins	SFBA0-7
8	18.4409	54.7011	227/18/2040	2018-08-21	Flamprop-isopropyl	µg/dm3	0.1	p.0,1	-	1	Eurofins	SFBA0-7
8	18.4409	54.7011	227/18/2040	2018-08-21	Flamprop-methyl	µg/dm3	0.1	p.0,1	-	1	Eurofins	SFBA0-7
8	18.4409	54.7011	227/18/2040	2018-08-21	Flonikamid	µg/dm3	0.1	p.0,1	-	1	Eurofins	SFBA0-7
8	18.4409	54.7011	227/18/2040	2018-08-21	Fluazifop-butyl	µg/dm3	0.1	p.0,1	-	1	Eurofins	SFBA0-7
8	18.4409	54.7011	227/18/2040	2018-08-21	Fluazinam	µg/dm3	0.1	p.0,1	-	1	Eurofins	SFBA0-7
8	18.4409	54.7011	227/18/2040	2018-08-21	Fluchloralina	µg/dm3	0.1	p.0,1	-	1	Eurofins	SFBA0-7
8	18.4409	54.7011	227/18/2040	2018-08-21	Flucytrynat	µg/dm3	0.1	p.0,1	-	1	Eurofins	SFBA0-7
8	18.4409	54.7011	227/18/2040	2018-08-21	Flufenoksuron	µg/dm3	0.1	p.0,1	-	1	Eurofins	SFBA0-7
8	18.4409	54.7011	227/18/2040	2018-08-21	Flumethrine	µg/dm3	0.1	p.0,1	-	1	Eurofins	SFBA0-7
8	18.4409	54.7011	227/18/2040	2018-08-21	Flumetralin	µg/dm3	0.1	p.0,1	-	1	Eurofins	SFBA0-7
8	18.4409	54.7011	227/18/2040	2018-08-21	Flupikolid	µg/dm3	0.1	p.0,1	-	1	Eurofins	SFBA0-7
8	18.4409	54.7011	227/18/2040	2018-08-21	Fluorodifen	µg/dm3	0.1	p.0,1	-	1	Eurofins	SFBA0-7
8	18.4409	54.7011	227/18/2040	2018-08-21	Fluotrimazole	µg/dm3	0.1	p.0,1	-	1	Eurofins	SFBA0-7
8	18.4409	54.7011	227/18/2040	2018-08-21	Fluchinkonazol	µg/dm3	0.1	p.0,1	-	1	Eurofins	SFBA0-7
8	18.4409	54.7011	227/18/2040	2018-08-21	Flurenol-butyl	µg/dm3	0.1	p.0,1	-	1	Eurofins	SFBA0-7
8	18.4409	54.7011	227/18/2040	2018-08-21	Flurochloridon	µg/dm3	0.1	p.0,1	-	1	Eurofins	SFBA0-7
8	18.4409	54.7011	227/18/2040	2018-08-21	Flurtamone	µg/dm3	0.05	p.0,05	-	1	Eurofins	SFBA0-7
8	18.4409	54.7011	227/18/2040	2018-08-21	Flusilazol	µg/dm3	0.1	p.0,1	-	1	Eurofins	SFBA0-7
8	18.4409	54.7011	227/18/2040	2018-08-21	Folpet	µg/dm3	0.1	p.0,1	-	1	Eurofins	SFBA0-7
8	18.4409	54.7011	227/18/2040	2018-08-21	Fonofos	µg/dm3	0.1	p.0,1	-	1	Eurofins	SFBA0-7
8	18.4409	54.7011	227/18/2040	2018-08-21	Formotion	µg/dm3	0.1	p.0,1	-	1	Eurofins	SFBA0-7
8	18.4409	54.7011	227/18/2040	2018-08-21	Genite	µg/dm3	0.1	p.0,1	-	1	Eurofins	SFBA0-7
8	18.4409	54.7011	227/18/2040	2018-08-21	Halfenprox	µg/dm3	0.1	p.0,1	-	1	Eurofins	SFBA0-7
8	18.4409	54.7011	227/18/2040	2018-08-21	Haloxyfop-Ethoxyethyl	µg/dm3	0.1	p.0,1	-	1	Eurofins	SFBA0-7
8	18.4409	54.7011	227/18/2040	2018-08-21	Haloxyfop-methyl	µg/dm3	0.1	p.0,1	-	1	Eurofins	SFBA0-7
8	18.4409	54.7011	227/18/2040	2018-08-21	HCH (sumaizomerów-bez lindan)	µg/dm3	0.1	p.0,1	-	1	Eurofins	SFBA0-7
8	18.4409	54.7011	227/18/2040	2018-08-21	Alfa-HCH	µg/dm3	0.05	p.0,05	-	1	Eurofins	SFBA0-7
8	18.4409	54.7011	227/18/2040	2018-08-21	Beta-HCH	µg/dm3	0.05	p.0,05	-	1	Eurofins	SFBA0-7
8	18.4409	54.7011	227/18/2040	2018-08-21	Delta-HCH	µg/dm3	0.05	p.0,05	-	1	Eurofins	SFBA0-7
8	18.4409	54.7011	227/18/2040	2018-08-21	Epsilon-HCH	µg/dm3	0.05	p.0,05	-	1	Eurofins	SFBA0-7
8	18.4409	54.7011	227/18/2040	2018-08-21	Lindan(gamma-HCH)	µg/dm3	0.1	p.0,1	-	1	Eurofins	SFBA0-7
8	18.4409	54.7011	227/18/2040	2018-08-21	Heptachlor	µg/dm3	0.03	p.0,03	-	1	Eurofins	SFBA0-7
8	18.4409	54.7011	227/18/2040	2018-08-21	Heptachlor(suma)	µg/dm3	0.03	p.0,03	-	1	Eurofins	SFBA0-7
8	18.4409	54.7011	227/18/2040	2018-08-21	Heptahlor-trans-epoksyd	µg/dm3	0.03	p.0,03	-	1	Eurofins	SFBA0-7
8	18.4409	54.7011	227/18/2040	2018-08-21	Heptahlor-cis-epoksyd	µg/dm3	0.03	p.0,03	-	1	Eurofins	SFBA0-7
8	18.4409	54.7011	227/18/2040	2018-08-21	Heptenofos	µg/dm3	0.1	p.0,1	-	1	Eurofins	SFBA0-7
8	18.4409	54.7011	227/18/2040	2018-08-21	Heksachlorobenzen(HCB)	µg/dm3	0.1	p.0,1	-	1	Eurofins	SFBA0-7
8	18.4409	54.7011	227/18/2040	2018-08-21	Heksakonazol	µg/dm3	0.1	p.0,1	-	1	Eurofins	SFBA0-7
8	18.4409	54.7011	227/18/2040	2018-08-21	Indanofan	µg/dm3	0.1	p.0,1	-	1	Eurofins	SFBA0-7
8	18.4409	54.7011	227/18/2040	2018-08-21	Indoksakarb	µg/dm3	0.1	p.0,1	-	1	Eurofins	SFBA0-7
8	18.4409	54.7011	227/18/2040	2018-08-21	Jodofenfos	µg/dm3	0.1	p.0,1	-	1	Eurofins	SFBA0-7
8	18.4409	54.7011	227/18/2040	2018-08-21	Ioxynil-Octanoate	µg/dm3	0.1	p.0,1	-	1	Eurofins	SFBA0-7
8	18.4409	54.7011	227/18/2040	2018-08-21	Iprobenfos	µg/dm3	0.1	p.0,1	-	1	Eurofins	SFBA0-7
8	18.4409	54.7011	227/18/2040	2018-08-21	Iprodion	µg/dm3	0.1	p.0,1	-	1	Eurofins	SFBA0-7
8	18.4409	54.7011	227/18/2040	2018-08-21	Isazophos	µg/dm3	0.1	p.0,1	-	1	Eurofins	SFBA0-7
8	18.4409	54.7011	227/18/2040	2018-08-21	Isobenzan	µg/dm3	0.1	p.0,1	-	1	Eurofins	SFBA0-7
8	18.4409	54.7011	227/18/2040	2018-08-21	Isocarbofos	µg/dm3	0.1	p.0,1	-	1	Eurofins	SFBA0-7
8	18.4409	54.7011	227/18/2040	2018-08-21	Izodryna	µg/dm3	0.1	p.0,1	-	1	Eurofins	SFBA0-7
8	18.4409	54.7011	227/18/2040	2018-08-21	Izofenfos	µg/dm3	0.1	p.0,1	-	1	Eurofins	SFBA0-7
8	18.4409	54.7011	227/18/2040	2018-08-21	Isofenphos-Methyl	µg/dm3	0.1	p.0,1	-	1	Eurofins	SFBA0-7
8	18.4409	54.7011	227/18/2040	2018-08-21	Isomethiozin	µg/dm3	0.1	p.0,1	-	1	Eurofins	SFBA0-7
8	18.4409	54.7011	227/18/2040	2018-08-21	Isopropalin	µg/dm3	0.1	p.0,1	-	1	Eurofins	SFBA0-7
8	18.4409	54.7011	227/18/2040	2018-08-21	Isoxadifen-ethyl	µg/dm3	0.1	p.0,1	-	1	Eurofins	SFBA0-7
8	18.4409	54.7011	227/18/2040	2018-08-21	Krezoksym-metylu	µg/dm3	0.1	p.0,1	-	1	Eurofins	SFBA0-7
8	18.4409	54.7011	227/18/2040	2018-08-21	Lactofen	µg/dm3	0.1	p.0,1	-	1	Eurofins	SFBA0-7
8	18.4409	54.7011	227/18/2040	2018-08-21	Leptophos	µg/dm3	0.1	p.0,1	-	1	Eurofins	SFBA0-7
8	18.4409	54.7011	227/18/2040	2018-08-21	Lufenuron	µg/dm3	0.1	p.0,1	-	1	Eurofins	SFBA0-7
8	18.4409	54.7011	227/18/2040	2018-08-21	Malaokson	µg/dm3	0.05	p.0,05	-	1	Eurofins	SFBA0-7
8	18.4409	54.7011	227/18/2040	2018-08-21	Malation	µg/dm3	0.1	p.0,1	-	1	Eurofins	SFBA0-7
8	18.4409	54.7011	227/18/2040	2018-08-21	Mekarbam	µg/dm3	0.1	p.0,1	-	1	Eurofins	SFBA0-7
8	18.4409	54.7011	227/18/2040	2018-08-21	Mephosfolan	µg/dm3	0.1	p.0,1	-	1	Eurofins	SFBA0-7
8	18.4409	54.7011	227/18/2040	2018-08-21	Merphos	µg/dm3	0.1	p.0,1	-	1	Eurofins	SFBA0-7
8	18.4409	54.7011	227/18/2040	2018-08-21	Metazachlor	µg/dm3	0.1	p.0,1	-	1	Eurofins	SFBA0-7
8	18.4409	54.7011	227/18/2040	2018-08-21	Metakrifos	µg/dm3	0.1	p.0,1	-	1	Eurofins	SFBA0-7
8	18.4409	54.7011	227/18/2040	2018-08-21	Metydation	µg/dm3	0.1	p.0,1	-	1	Eurofins	SFBA0-7
8	18.4409	54.7011	227/18/2040	2018-08-21	Metoksychlor	µg/dm3	0.1	p.0,1	-	1	Eurofins	SFBA0-7
8	18.4409	54.7011	227/18/2040	2018-08-21	Metolachlor	µg/dm3	0.1	p.0,1	-	1	Eurofins	SFBA0-7
8	18.4409	54.7011	227/18/2040	2018-08-21	Metrafenon	µg/dm3	0.1	p.0,1	-	1	Eurofins	SFBA0-7
8	18.4409	54.7011	227/18/2040	2018-08-21	Metribuzyn	µg/dm3	0.1	p.0,1	-	1	Eurofins	SFBA0-7
8	18.4409	54.7011	227/18/2040	2018-08-21	Mevinfos	µg/dm3	0.1	p.0,1	-	1	Eurofins	SFBA0-7
8	18.4409	54.7011	227/18/2040	2018-08-21	Mirex	µg/dm3	0.1	p.0,1	-	1	Eurofins	SFBA0-7
8	18.4409	54.7011	227/18/2040	2018-08-21	Molinate	µg/dm3	0.1	p.0,1	-	1	Eurofins	SFBA0-7
8	18.4409	54.7011	227/18/2040	2018-08-21	Myklobutanil	µg/dm3	0.1	p.0,1	-	1	Eurofins	SFBA0-7
8	18.4409	54.7011	227/18/2040	2018-08-21	Nitralin	µg/dm3	0.1	p.0,1	-	1	Eurofins	SFBA0-7
8	18.4409	54.7011	227/18/2040	2018-08-21	Nitrapyrin	µg/dm3	0.1	p.0,1	-	1	Eurofins	SFBA0-7
8	18.4409	54.7011	227/18/2040	2018-08-21	Nitrofen	µg/dm3	0.1	p.0,1	-	1	Eurofins	SFBA0-7
8	18.4409	54.7011	227/18/2040	2018-08-21	Nitrothal-isopropyl	µg/dm3	0.1	p.0,1	-	1	Eurofins	SFBA0-7
8	18.4409	54.7011	227/18/2040	2018-08-21	Norflurazon	µg/dm3	0.1	p.0,1	-	1	Eurofins	SFBA0-7
8	18.4409	54.7011	227/18/2040	2018-08-21	Nuarimol	µg/dm3	0.1	p.0,1	-	1	Eurofins	SFBA0-7
8	18.4409	54.7011	227/18/2040	2018-08-21	Ometoat	µg/dm3	0.1	p.0,1	-	1	Eurofins	SFBA0-7
8	18.4409	54.7011	227/18/2040	2018-08-21	Oxadiazon	µg/dm3	0.1	p.0,1	-	1	Eurofins	SFBA0-7
8	18.4409	54.7011	227/18/2040	2018-08-21	Oxydemeton-methyl	µg/dm3	0.1	p.0,1	-	1	Eurofins	SFBA0-7
8	18.4409	54.7011	227/18/2040	2018-08-21	Oksyfluoroten	µg/dm3	0.1	p.0,1	-	1	Eurofins	SFBA0-7
8	18.4409	54.7011	227/18/2040	2018-08-21	Paklobutrazol	µg/dm3	0.1	p.0,1	-	1	Eurofins	SFBA0-7
8	18.4409	54.7011	227/18/2040	2018-08-21	Paraoxon-ethyl	µg/dm3	0.1	p.0,1	-	1	Eurofins	SFBA0-7
8	18.4409	54.7011	227/18/2040	2018-08-21	Paraokson metylowy	µg/dm3	0.1	p.0,1	-	1	Eurofins	SFBA0-7
8	18.4409	54.7011	227/18/2040	2018-08-21	Paration	µg/dm3	0.1	p.0,1	-	1	Eurofins	SFBA0-7
8	18.4409	54.7011	227/18/2040	2018-08-21	Paration metylu	µg/dm3	0.1	p.0,1	-	1	Eurofins	SFBA0-7
8	18.4409	54.7011	227/18/2040	2018-08-21	Paration metylu/Paraokson metylu (suma)	µg/dm3	0.1	p.0,1	-	1	Eurofins	SFBA0-7
8	18.4409	54.7011	227/18/2040	2018-08-21	PCB IUPAC 101	µg/dm3	0.05	p.0,05	-	1	Eurofins	SFBA0-7
8	18.4409	54.7011	227/18/2040	2018-08-21	PCB 118	µg/dm3	0.05	p.0,05	-	1	Eurofins	SFBA0-7
8	18.4409	54.7011	227/18/2040	2018-08-21	PCB 138	µg/dm3	0.05	p.0,05	-	1	Eurofins	SFBA0-7
8	18.4409	54.7011	227/18/2040	2018-08-21	PCB 153	µg/dm3	0.05	p.0,05	-	1	Eurofins	SFBA0-7
8	18.4409	54.7011	227/18/2040	2018-08-21	PCB 180	µg/dm3	0.05	p.0,05	-	1	Eurofins	SFBA0-7
8	18.4409	54.7011	227/18/2040	2018-08-21	PCB 28	µg/dm3	0.05	p.0,05	-	1	Eurofins	SFBA0-7
8	18.4409	54.7011	227/18/2040	2018-08-21	PCB 52	µg/dm3	0.05	p.0,05	-	1	Eurofins	SFBA0-7
8	18.4409	54.7011	227/18/2040	2018-08-21	Penkonazol	µg/dm3	0.1	p.0,1	-	1	Eurofins	SFBA0-7
8	18.4409	54.7011	227/18/2040	2018-08-21	Pendimetalina	µg/dm3	0.1	p.0,1	-	1	Eurofins	SFBA0-7
8	18.4409	54.7011	227/18/2040	2018-08-21	Pentachloranisol	µg/dm3	0.1	p.0,1	-	1	Eurofins	SFBA0-7
8	18.4409	54.7011	227/18/2040	2018-08-21	Pentachloraniline	µg/dm3	0.1	p.0,1	-	1	Eurofins	SFBA0-7
8	18.4409	54.7011	227/18/2040	2018-08-21	Pentachlorobenzen	µg/dm3	0.1	p.0,1	-	1	Eurofins	SFBA0-7
8	18.4409	54.7011	227/18/2040	2018-08-21	Pentachlorothioanisole	µg/dm3	0.1	p.0,1	-	1	Eurofins	SFBA0-7
8	18.4409	54.7011	227/18/2040	2018-08-21	Permetryna	µg/dm3	0.1	p.0,1	-	1	Eurofins	SFBA0-7
8	18.4409	54.7011	227/18/2040	2018-08-21	Pertan	µg/dm3	0.1	p.0,1	-	1	Eurofins	SFBA0-7
8	18.4409	54.7011	227/18/2040	2018-08-21	Phenkapton	µg/dm3	0.1	p.0,1	-	1	Eurofins	SFBA0-7
8	18.4409	54.7011	227/18/2040	2018-08-21	Phenothrin	µg/dm3	0.1	p.0,1	-	1	Eurofins	SFBA0-7
8	18.4409	54.7011	227/18/2040	2018-08-21	Fentoat	µg/dm3	0.1	p.0,1	-	1	Eurofins	SFBA0-7
8	18.4409	54.7011	227/18/2040	2018-08-21	Fosalon	µg/dm3	0.1	p.0,1	-	1	Eurofins	SFBA0-7
8	18.4409	54.7011	227/18/2040	2018-08-21	Phosfolane	µg/dm3	0.1	p.0,1	-	1	Eurofins	SFBA0-7
8	18.4409	54.7011	227/18/2040	2018-08-21	Fosmet	µg/dm3	0.1	p.0,1	-	1	Eurofins	SFBA0-7
8	18.4409	54.7011	227/18/2040	2018-08-21	Picolinafen	µg/dm3	0.1	p.0,1	-	1	Eurofins	SFBA0-7
8	18.4409	54.7011	227/18/2040	2018-08-21	Pikoksystrobina	µg/dm3	0.1	p.0,1	-	1	Eurofins	SFBA0-7
8	18.4409	54.7011	227/18/2040	2018-08-21	Piperophos	µg/dm3	0.1	p.0,1	-	1	Eurofins	SFBA0-7
8	18.4409	54.7011	227/18/2040	2018-08-21	Pirymifos metylowy	µg/dm3	0.1	p.0,1	-	1	Eurofins	SFBA0-7
8	18.4409	54.7011	227/18/2040	2018-08-21	Pirymifos etylu	µg/dm3	0.1	p.0,1	-	1	Eurofins	SFBA0-7
8	18.4409	54.7011	227/18/2040	2018-08-21	Plifenate	µg/dm3	0.1	p.0,1	-	1	Eurofins	SFBA0-7
8	18.4409	54.7011	227/18/2040	2018-08-21	Praletryna	µg/dm3	0.1	p.0,1	-	1	Eurofins	SFBA0-7
8	18.4409	54.7011	227/18/2040	2018-08-21	Procymidon	µg/dm3	0.1	p.0,1	-	1	Eurofins	SFBA0-7
8	18.4409	54.7011	227/18/2040	2018-08-21	Profenfos	µg/dm3	0.1	p.0,1	-	1	Eurofins	SFBA0-7
8	18.4409	54.7011	227/18/2040	2018-08-21	Profluralina	µg/dm3	0.1	p.0,1	-	1	Eurofins	SFBA0-7
8	18.4409	54.7011	227/18/2040	2018-08-21	Propachlor	µg/dm3	0.1	p.0,1	-	1	Eurofins	SFBA0-7
8	18.4409	54.7011	227/18/2040	2018-08-21	Propanil	µg/dm3	0.1	p.0,1	-	1	Eurofins	SFBA0-7
8	18.4409	54.7011	227/18/2040	2018-08-21	Propazyna	µg/dm3	0.1	p.0,1	-	1	Eurofins	SFBA0-7
8	18.4409	54.7011	227/18/2040	2018-08-21	Propetamfos	µg/dm3	0.1	p.0,1	-	1	Eurofins	SFBA0-7
8	18.4409	54.7011	227/18/2040	2018-08-21	Propikonazol	µg/dm3	0.1	p.0,1	-	1	Eurofins	SFBA0-7
8	18.4409	54.7011	227/18/2040	2018-08-21	Propyzamid	µg/dm3	0.1	p.0,1	-	1	Eurofins	SFBA0-7
8	18.4409	54.7011	227/18/2040	2018-08-21	Protiofos	µg/dm3	0.1	p.0,1	-	1	Eurofins	SFBA0-7
8	18.4409	54.7011	227/18/2040	2018-08-21	Prothoat	µg/dm3	0.1	p.0,1	-	1	Eurofins	SFBA0-7
8	18.4409	54.7011	227/18/2040	2018-08-21	Pyraclofos	µg/dm3	0.1	p.0,1	-	1	Eurofins	SFBA0-7
8	18.4409	54.7011	227/18/2040	2018-08-21	Pyraflufen-ethyl	µg/dm3	0.1	p.0,1	-	1	Eurofins	SFBA0-7
8	18.4409	54.7011	227/18/2040	2018-08-21	Pirazofos	µg/dm3	0.1	p.0,1	-	1	Eurofins	SFBA0-7
8	18.4409	54.7011	227/18/2040	2018-08-21	Pyretryny	µg/dm3	0.1	p.0,1	-	1	Eurofins	SFBA0-7
8	18.4409	54.7011	227/18/2040	2018-08-21	Pirydaben	µg/dm3	0.1	p.0,1	-	1	Eurofins	SFBA0-7
8	18.4409	54.7011	227/18/2040	2018-08-21	Pyridaphenthion	µg/dm3	0.1	p.0,1	-	1	Eurofins	SFBA0-7
8	18.4409	54.7011	227/18/2040	2018-08-21	Pyrifenox	µg/dm3	0.1	p.0,1	-	1	Eurofins	SFBA0-7
8	18.4409	54.7011	227/18/2040	2018-08-21	Pirimithate	µg/dm3	0.1	p.0,1	-	1	Eurofins	SFBA0-7
8	18.4409	54.7011	227/18/2040	2018-08-21	Chinalofos	µg/dm3	0.1	p.0,1	-	1	Eurofins	SFBA0-7
8	18.4409	54.7011	227/18/2040	2018-08-21	Chinoksyfen	µg/dm3	0.1	p.0,1	-	1	Eurofins	SFBA0-7
8	18.4409	54.7011	227/18/2040	2018-08-21	Kwintocen	µg/dm3	0.1	p.0,1	-	1	Eurofins	SFBA0-7
8	18.4409	54.7011	227/18/2040	2018-08-21	Quintozene (suma)	µg/dm3	0.1	p.0,1	-	1	Eurofins	SFBA0-7
8	18.4409	54.7011	227/18/2040	2018-08-21	Chizalofop etylowy	µg/dm3	0.1	p.0,1	-	1	Eurofins	SFBA0-7
8	18.4409	54.7011	227/18/2040	2018-08-21	Resmetryna	µg/dm3	0.1	p.0,1	-	1	Eurofins	SFBA0-7
8	18.4409	54.7011	227/18/2040	2018-08-21	S421 Octachlordipropyleter)	µg/dm3	0.1	p.0,1	-	1	Eurofins	SFBA0-7
8	18.4409	54.7011	227/18/2040	2018-08-21	Spiromesifen	µg/dm3	0.1	p.0,1	-	1	Eurofins	SFBA0-7
8	18.4409	54.7011	227/18/2040	2018-08-21	Sulfotep	µg/dm3	0.1	p.0,1	-	1	Eurofins	SFBA0-7
8	18.4409	54.7011	227/18/2040	2018-08-21	Sulprofos	µg/dm3	0.1	p.0,1	-	1	Eurofins	SFBA0-7
8	18.4409	54.7011	227/18/2040	2018-08-21	Swep	µg/dm3	0.1	p.0,1	-	1	Eurofins	SFBA0-7
8	18.4409	54.7011	227/18/2040	2018-08-21	tau-Fluvalinate	µg/dm3	0.1	p.0,1	-	1	Eurofins	SFBA0-7
8	18.4409	54.7011	227/18/2040	2018-08-21	Tebupirimfos	µg/dm3	0.1	p.0,1	-	1	Eurofins	SFBA0-7
8	18.4409	54.7011	227/18/2040	2018-08-21	Technazen	µg/dm3	0.1	p.0,1	-	1	Eurofins	SFBA0-7
8	18.4409	54.7011	227/18/2040	2018-08-21	Teflutryna	µg/dm3	0.1	p.0,1	-	1	Eurofins	SFBA0-7
8	18.4409	54.7011	227/18/2040	2018-08-21	Temephos	µg/dm3	0.1	p.0,1	-	1	Eurofins	SFBA0-7
8	18.4409	54.7011	227/18/2040	2018-08-21	Terbufos	µg/dm3	0.1	p.0,1	-	1	Eurofins	SFBA0-7
8	18.4409	54.7011	227/18/2040	2018-08-21	Tetrachlorwinfos	µg/dm3	0.1	p.0,1	-	1	Eurofins	SFBA0-7
8	18.4409	54.7011	227/18/2040	2018-08-21	Tetrakonazol	µg/dm3	0.1	p.0,1	-	1	Eurofins	SFBA0-7
8	18.4409	54.7011	227/18/2040	2018-08-21	Tetradifon	µg/dm3	0.1	p.0,1	-	1	Eurofins	SFBA0-7
8	18.4409	54.7011	227/18/2040	2018-08-21	Tetrametryna	µg/dm3	0.1	p.0,1	-	1	Eurofins	SFBA0-7
8	18.4409	54.7011	227/18/2040	2018-08-21	Tetrasul	µg/dm3	0.1	p.0,1	-	1	Eurofins	SFBA0-7
8	18.4409	54.7011	227/18/2040	2018-08-21	Tolklofos metylu	µg/dm3	0.1	p.0,1	-	1	Eurofins	SFBA0-7
8	18.4409	54.7011	227/18/2040	2018-08-21	Tolilofluanid	µg/dm3	0.1	p.0,1	-	1	Eurofins	SFBA0-7
8	18.4409	54.7011	227/18/2040	2018-08-21	Toxaphene Parlar 26	µg/dm3	0.05	p.0,05	-	1	Eurofins	SFBA0-7
8	18.4409	54.7011	227/18/2040	2018-08-21	Toxaphene Parlar 50	µg/dm3	0.05	p.0,05	-	1	Eurofins	SFBA0-7
8	18.4409	54.7011	227/18/2040	2018-08-21	Toxaphene Parlar 62	µg/dm3	0.05	p.0,05	-	1	Eurofins	SFBA0-7
8	18.4409	54.7011	227/18/2040	2018-08-21	Transfluthrin	µg/dm3	0.1	p.0,1	-	1	Eurofins	SFBA0-7
8	18.4409	54.7011	227/18/2040	2018-08-21	Triadimefon	µg/dm3	0.1	p.0,1	-	1	Eurofins	SFBA0-7
8	18.4409	54.7011	227/18/2040	2018-08-21	Triadimenol	µg/dm3	0.1	p.0,1	-	1	Eurofins	SFBA0-7
8	18.4409	54.7011	227/18/2040	2018-08-21	Triadimenol/Triadimefon(suma)	µg/dm3	0.1	p.0,1	-	1	Eurofins	SFBA0-7
8	18.4409	54.7011	227/18/2040	2018-08-21	Trialat	µg/dm3	0.1	p.0,1	-	1	Eurofins	SFBA0-7
8	18.4409	54.7011	227/18/2040	2018-08-21	Triamiphos	µg/dm3	0.1	p.0,1	-	1	Eurofins	SFBA0-7
8	18.4409	54.7011	227/18/2040	2018-08-21	Triazofos	µg/dm3	0.1	p.0,1	-	1	Eurofins	SFBA0-7
8	18.4409	54.7011	227/18/2040	2018-08-21	Tribufos	µg/dm3	0.1	p.0,1	-	1	Eurofins	SFBA0-7
8	18.4409	54.7011	227/18/2040	2018-08-21	Trichloronat	µg/dm3	0.1	p.0,1	-	1	Eurofins	SFBA0-7
8	18.4409	54.7011	227/18/2040	2018-08-21	Tridiphane	µg/dm3	0.1	p.0,1	-	1	Eurofins	SFBA0-7
8	18.4409	54.7011	227/18/2040	2018-08-21	Trifloksystrobina	µg/dm3	0.1	p.0,1	-	1	Eurofins	SFBA0-7
8	18.4409	54.7011	227/18/2040	2018-08-21	Trifluralina	µg/dm3	0.1	p.0,1	-	1	Eurofins	SFBA0-7
8	18.4409	54.7011	227/18/2040	2018-08-21	Vamidothion	µg/dm3	0.1	p.0,1	-	1	Eurofins	SFBA0-7
8	18.4409	54.7011	227/18/2040	2018-08-21	Winklozolina	µg/dm3	0.1	p.0,1	-	1	Eurofins	SFBA0-7
12	18.3954	547619	227/18/2041	2018-08-21	α - HCH	µg/dm3	0.002	p.0,002	-	1	M. Wojtkiewicz	PN-EN 16693:2015-12
12	18.3954	547619	227/18/2041	2018-08-21	β - HCH	µg/dm3	0.002	p.0,002	-	1	M. Wojtkiewicz	PN-EN 16693:2015-12
12	18.3954	547619	227/18/2041	2018-08-21	γ - HCH	µg/dm3	0.002	p.0,002	-	1	M. Wojtkiewicz	PN-EN 16693:2015-12
12	18.3954	547619	227/18/2041	2018-08-21	δ - HCH	µg/dm3	0.002	p.0,002	-	1	M. Wojtkiewicz	PN-EN 16693:2015-12
12	18.3954	547619	227/18/2041	2018-08-21	Aldryna	µg/dm3	0.005	p.0,005	-	1	M. Wojtkiewicz	PN-EN 16693:2015-12
12	18.3954	547619	227/18/2041	2018-08-21	Izodryna	µg/dm3	0.005	p.0,005	-	1	M. Wojtkiewicz	PN-EN 16693:2015-12
12	18.3954	547619	227/18/2041	2018-08-21	Dieldryna	µg/dm3	0.005	p.0,005	-	1	M. Wojtkiewicz	PN-EN 16693:2015-12
12	18.3954	547619	227/18/2041	2018-08-21	Endryna	µg/dm3	0.005	p.0,005	-	1	M. Wojtkiewicz	PN-EN 16693:2015-12
12	18.3954	547619	227/18/2041	2018-08-21	DDE	µg/dm3	0.01	p.0,01	-	1	M. Wojtkiewicz	PN-EN 16693:2015-12
12	18.3954	547619	227/18/2041	2018-08-21	DDD	µg/dm3	0.01	p.0,01	-	1	M. Wojtkiewicz	PN-EN 16693:2015-12
12	18.3954	547619	227/18/2041	2018-08-21	DDT	µg/dm3	0.01	p.0,01	-	1	M. Wojtkiewicz	PN-EN 16693:2015-12
14	18.4063	54.7623	227/18/2042	2018-08-21	α - HCH	µg/dm3	0.002	p.0,002	-	1	M. Wojtkiewicz	PN-EN 16693:2015-12
14	18.4063	55.7623	227/18/2042	2018-08-21	β - HCH	µg/dm3	0.002	p.0,002	-	1	M. Wojtkiewicz	PN-EN 16693:2015-12
14	18.4063	56.7623	227/18/2042	2018-08-21	γ - HCH	µg/dm3	0.002	p.0,002	-	1	M. Wojtkiewicz	PN-EN 16693:2015-12
14	18.4063	57.7623	227/18/2042	2018-08-21	δ - HCH	µg/dm3	0.002	p.0,002	-	1	M. Wojtkiewicz	PN-EN 16693:2015-12
14	18.4063	58.7623	227/18/2042	2018-08-21	Aldryna	µg/dm3	0.005	p.0,005	-	1	M. Wojtkiewicz	PN-EN 16693:2015-12
14	18.4063	59.7623	227/18/2042	2018-08-21	Izodryna	µg/dm3	0.005	p.0,005	-	1	M. Wojtkiewicz	PN-EN 16693:2015-12
14	18.4063	60.7623	227/18/2042	2018-08-21	Dieldryna	µg/dm3	0.005	p.0,005	-	1	M. Wojtkiewicz	PN-EN 16693:2015-12
14	18.4063	61.7623	227/18/2042	2018-08-21	Endryna	µg/dm3	0.005	p.0,005	-	1	M. Wojtkiewicz	PN-EN 16693:2015-12
14	18.4063	62.7623	227/18/2042	2018-08-21	DDE	µg/dm3	0.01	p.0,01	-	1	M. Wojtkiewicz	PN-EN 16693:2015-12
14	18.4063	63.7623	227/18/2042	2018-08-21	DDD	µg/dm3	0.01	p.0,01	-	1	M. Wojtkiewicz	PN-EN 16693:2015-12
14	18.4063	64.7623	227/18/2042	2018-08-21	DDT	µg/dm3	0.01	p.0,01	-	1	M. Wojtkiewicz	PN-EN 16693:2015-12
19	18.3199	54.7711	227/18/2043	2018-08-21	α - HCH	µg/dm3	0.002	p.0,002	-	1	M. Wojtkiewicz	PN-EN 16693:2015-12
19	18.3199	54.7711	227/18/2043	2018-08-21	β - HCH	µg/dm3	0.002	p.0,002	-	1	M. Wojtkiewicz	PN-EN 16693:2015-12
19	18.3199	54.7711	227/18/2043	2018-08-21	γ - HCH	µg/dm3	0.002	p.0,002	-	1	M. Wojtkiewicz	PN-EN 16693:2015-12
19	18.3199	54.7711	227/18/2043	2018-08-21	δ - HCH	µg/dm3	0.002	p.0,002	-	1	M. Wojtkiewicz	PN-EN 16693:2015-12
19	18.3199	54.7711	227/18/2043	2018-08-21	Aldryna	µg/dm3	0.005	p.0,005	-	1	M. Wojtkiewicz	PN-EN 16693:2015-12
19	18.3199	54.7711	227/18/2043	2018-08-21	Izodryna	µg/dm3	0.005	p.0,005	-	1	M. Wojtkiewicz	PN-EN 16693:2015-12
19	18.3199	54.7711	227/18/2043	2018-08-21	Dieldryna	µg/dm3	0.005	p.0,005	-	1	M. Wojtkiewicz	PN-EN 16693:2015-12
19	18.3199	54.7711	227/18/2043	2018-08-21	Endryna	µg/dm3	0.005	p.0,005	-	1	M. Wojtkiewicz	PN-EN 16693:2015-12
19	18.3199	54.7711	227/18/2043	2018-08-21	DDE	µg/dm3	0.01	p.0,01	-	1	M. Wojtkiewicz	PN-EN 16693:2015-12
19	18.3199	54.7711	227/18/2043	2018-08-21	DDD	µg/dm3	0.01	p.0,01	-	1	M. Wojtkiewicz	PN-EN 16693:2015-12
19	18.3199	54.7711	227/18/2043	2018-08-21	DDT	µg/dm3	0.01	p.0,01	-	1	M. Wojtkiewicz	PN-EN 16693:2015-12
21	18.2911	54.7603	227/18/2044	2018-08-21	α - HCH	µg/dm3	0.002	p.0,002	-	1	M. Wojtkiewicz	PN-EN 16693:2015-12
21	18.2911	54.7603	227/18/2044	2018-08-21	β - HCH	µg/dm3	0.002	p.0,002	-	1	M. Wojtkiewicz	PN-EN 16693:2015-12
21	18.2911	54.7603	227/18/2044	2018-08-21	γ - HCH	µg/dm3	0.002	p.0,002	-	1	M. Wojtkiewicz	PN-EN 16693:2015-12
21	18.2911	54.7603	227/18/2044	2018-08-21	δ - HCH	µg/dm3	0.002	p.0,002	-	1	M. Wojtkiewicz	PN-EN 16693:2015-12
21	18.2911	54.7603	227/18/2044	2018-08-21	Aldryna	µg/dm3	0.005	p.0,005	-	1	M. Wojtkiewicz	PN-EN 16693:2015-12
21	18.2911	54.7603	227/18/2044	2018-08-21	Izodryna	µg/dm3	0.005	p.0,005	-	1	M. Wojtkiewicz	PN-EN 16693:2015-12
21	18.2911	54.7603	227/18/2044	2018-08-21	Dieldryna	µg/dm3	0.005	p.0,005	-	1	M. Wojtkiewicz	PN-EN 16693:2015-12
21	18.2911	54.7603	227/18/2044	2018-08-21	Endryna	µg/dm3	0.005	p.0,005	-	1	M. Wojtkiewicz	PN-EN 16693:2015-12
21	18.2911	54.7603	227/18/2044	2018-08-21	DDE	µg/dm3	0.01	p.0,01	-	1	M. Wojtkiewicz	PN-EN 16693:2015-12
21	18.2911	54.7603	227/18/2044	2018-08-21	DDD	µg/dm3	0.01	p.0,01	-	1	M. Wojtkiewicz	PN-EN 16693:2015-12
21	18.2911	54.7603	227/18/2044	2018-08-21	DDT	µg/dm3	0.01	p.0,01	-	1	M. Wojtkiewicz	PN-EN 16693:2015-12
23	18.305	54.7471	227/18/2045	2018-08-21	α - HCH	µg/dm3	0.002	p.0,002	-	1	M. Wojtkiewicz	PN-EN 16693:2015-12
23	18.305	54.7471	227/18/2045	2018-08-21	β - HCH	µg/dm3	0.002	p.0,002	-	1	M. Wojtkiewicz	PN-EN 16693:2015-12
23	18.305	54.7471	227/18/2045	2018-08-21	γ - HCH	µg/dm3	0.002	p.0,002	-	1	M. Wojtkiewicz	PN-EN 16693:2015-12
23	18.305	54.7471	227/18/2045	2018-08-21	δ - HCH	µg/dm3	0.002	p.0,002	-	1	M. Wojtkiewicz	PN-EN 16693:2015-12
23	18.305	54.7471	227/18/2045	2018-08-21	Aldryna	µg/dm3	0.005	p.0,005	-	1	M. Wojtkiewicz	PN-EN 16693:2015-12
23	18.305	54.7471	227/18/2045	2018-08-21	Izodryna	µg/dm3	0.005	p.0,005	-	1	M. Wojtkiewicz	PN-EN 16693:2015-12
23	18.305	54.7471	227/18/2045	2018-08-21	Dieldryna	µg/dm3	0.005	p.0,005	-	1	M. Wojtkiewicz	PN-EN 16693:2015-12
23	18.305	54.7471	227/18/2045	2018-08-21	Endryna	µg/dm3	0.005	p.0,005	-	1	M. Wojtkiewicz	PN-EN 16693:2015-12
23	18.305	54.7471	227/18/2045	2018-08-21	DDE	µg/dm3	0.01	p.0,01	-	1	M. Wojtkiewicz	PN-EN 16693:2015-12
23	18.305	54.7471	227/18/2045	2018-08-21	DDD	µg/dm3	0.01	p.0,01	-	1	M. Wojtkiewicz	PN-EN 16693:2015-12
23	18.305	54.7471	227/18/2045	2018-08-21	DDT	µg/dm3	0.01	p.0,01	-	1	M. Wojtkiewicz	PN-EN 16693:2015-12
26	18.3295	54.7182	227/18/2046	2018-08-21	α - HCH	µg/dm3	0.002	p.0,002	-	1	M. Wojtkiewicz	PN-EN 16693:2015-12
26	18.3295	54.7182	227/18/2046	2018-08-21	β - HCH	µg/dm3	0.002	p.0,002	-	1	M. Wojtkiewicz	PN-EN 16693:2015-12
26	18.3295	54.7182	227/18/2046	2018-08-21	γ - HCH	µg/dm3	0.002	p.0,002	-	1	M. Wojtkiewicz	PN-EN 16693:2015-12
26	18.3295	54.7182	227/18/2046	2018-08-21	δ - HCH	µg/dm3	0.002	p.0,002	-	1	M. Wojtkiewicz	PN-EN 16693:2015-12
26	18.3295	54.7182	227/18/2046	2018-08-21	Aldryna	µg/dm3	0.005	p.0,005	-	1	M. Wojtkiewicz	PN-EN 16693:2015-12
26	18.3295	54.7182	227/18/2046	2018-08-21	Izodryna	µg/dm3	0.005	p.0,005	-	1	M. Wojtkiewicz	PN-EN 16693:2015-12
26	18.3295	54.7182	227/18/2046	2018-08-21	Dieldryna	µg/dm3	0.005	p.0,005	-	1	M. Wojtkiewicz	PN-EN 16693:2015-12
26	18.3295	54.7182	227/18/2046	2018-08-21	Endryna	µg/dm3	0.005	p.0,005	-	1	M. Wojtkiewicz	PN-EN 16693:2015-12
26	18.3295	54.7182	227/18/2046	2018-08-21	DDE	µg/dm3	0.01	p.0,01	-	1	M. Wojtkiewicz	PN-EN 16693:2015-12
26	18.3295	54.7182	227/18/2046	2018-08-21	DDD	µg/dm3	0.01	p.0,01	-	1	M. Wojtkiewicz	PN-EN 16693:2015-12
26	18.3295	54.7182	227/18/2046	2018-08-21	DDT	µg/dm3	0.01	p.0,01	-	1	M. Wojtkiewicz	PN-EN 16693:2015-12
31	18.3392	54.6727	227/18/2047	2018-08-21	α - HCH	µg/dm3	0.002	p.0,002	-	1	M. Wojtkiewicz	PN-EN 16693:2015-12
31	18.3392	54.6727	227/18/2047	2018-08-21	β - HCH	µg/dm3	0.002	p.0,002	-	1	M. Wojtkiewicz	PN-EN 16693:2015-12
31	18.3392	54.6727	227/18/2047	2018-08-21	γ - HCH	µg/dm3	0.002	p.0,002	-	1	M. Wojtkiewicz	PN-EN 16693:2015-12
31	18.3392	54.6727	227/18/2047	2018-08-21	δ - HCH	µg/dm3	0.002	p.0,002	-	1	M. Wojtkiewicz	PN-EN 16693:2015-12
31	18.3392	54.6727	227/18/2047	2018-08-21	Aldryna	µg/dm3	0.005	p.0,005	-	1	M. Wojtkiewicz	PN-EN 16693:2015-12
31	18.3392	54.6727	227/18/2047	2018-08-21	Izodryna	µg/dm3	0.005	p.0,005	-	1	M. Wojtkiewicz	PN-EN 16693:2015-12
31	18.3392	54.6727	227/18/2047	2018-08-21	Dieldryna	µg/dm3	0.005	p.0,005	-	1	M. Wojtkiewicz	PN-EN 16693:2015-12
31	18.3392	54.6727	227/18/2047	2018-08-21	Endryna	µg/dm3	0.005	p.0,005	-	1	M. Wojtkiewicz	PN-EN 16693:2015-12
31	18.3392	54.6727	227/18/2047	2018-08-21	DDE	µg/dm3	0.01	p.0,01	-	1	M. Wojtkiewicz	PN-EN 16693:2015-12
31	18.3392	54.6727	227/18/2047	2018-08-21	DDD	µg/dm3	0.01	p.0,01	-	1	M. Wojtkiewicz	PN-EN 16693:2015-12
31	18.3392	54.6727	227/18/2047	2018-08-21	DDT	µg/dm3	0.01	p.0,01	-	1	M. Wojtkiewicz	PN-EN 16693:2015-12
31	18.3392	54.6727	227/18/2047	2018-08-21	2,4,5-T-Methylester	µg/dm3	0.1	p.0,1	-	1	Eurofins	SFBA0-7
31	18.3392	54.6727	227/18/2047	2018-08-21	2,4-D-Methylester	µg/dm3	0.1	p.0,1	-	1	Eurofins	SFBA0-7
31	18.3392	54.6727	227/18/2047	2018-08-21	Acetochlor	µg/dm3	0.1	p.0,1	-	1	Eurofins	SFBA0-7
31	18.3392	54.6727	227/18/2047	2018-08-21	Aclonifen	µg/dm3	0.1	p.0,1	-	1	Eurofins	SFBA0-7
31	18.3392	54.6727	227/18/2047	2018-08-21	Akrynatryna	µg/dm3	0.1	p.0,1	-	1	Eurofins	SFBA0-7
31	18.3392	54.6727	227/18/2047	2018-08-21	Alachlor	µg/dm3	0.1	p.0,1	-	1	Eurofins	SFBA0-7
31	18.3392	54.6727	227/18/2047	2018-08-21	Aldryna	µg/dm3	0.03	p.0,03	-	1	Eurofins	SFBA0-7
31	18.3392	54.6727	227/18/2047	2018-08-21	Aldryna+Dieldryna	µg/dm3	0.1	p.0,1	-	1	Eurofins	SFBA0-7
31	18.3392	54.6727	227/18/2047	2018-08-21	Alletryna	µg/dm3	0.1	p.0,1	-	1	Eurofins	SFBA0-7
31	18.3392	54.6727	227/18/2047	2018-08-21	Amidithion	µg/dm3	0.1	p.0,1	-	1	Eurofins	SFBA0-7
31	18.3392	54.6727	227/18/2047	2018-08-21	Antrachinon	µg/dm3	0.1	p.0,1	-	1	Eurofins	SFBA0-7
31	18.3392	54.6727	227/18/2047	2018-08-21	Atrazyna	µg/dm3	0.1	p.0,1	-	1	Eurofins	SFBA0-7
31	18.3392	54.6727	227/18/2047	2018-08-21	Azakonazol	µg/dm3	0.1	p.0,1	-	1	Eurofins	SFBA0-7
31	18.3392	54.6727	227/18/2047	2018-08-21	Azynofos etylowy	µg/dm3	0.1	p.0,1	-	1	Eurofins	SFBA0-7
31	18.3392	54.6727	227/18/2047	2018-08-21	Azynofos metylowy	µg/dm3	0.1	p.0,1	-	1	Eurofins	SFBA0-7
31	18.3392	54.6727	227/18/2047	2018-08-21	Azoksystrobina	µg/dm3	0.1	p.0,1	-	1	Eurofins	SFBA0-7
31	18.3392	54.6727	227/18/2047	2018-08-21	Benfluralin	µg/dm3	0.1	p.0,1	-	1	Eurofins	SFBA0-7
31	18.3392	54.6727	227/18/2047	2018-08-21	Benoxacor	µg/dm3	0.1	p.0,1	-	1	Eurofins	SFBA0-7
31	18.3392	54.6727	227/18/2047	2018-08-21	Benzoylprop-ethyl	µg/dm3	0.1	p.0,1	-	1	Eurofins	SFBA0-7
31	18.3392	54.6727	227/18/2047	2018-08-21	Biofenox	µg/dm3	0.1	p.0,1	-	1	Eurofins	SFBA0-7
31	18.3392	54.6727	227/18/2047	2018-08-21	Binapacryl	µg/dm3	0.1	p.0,1	-	1	Eurofins	SFBA0-7
31	18.3392	54.6727	227/18/2047	2018-08-21	Bifentryna	µg/dm3	0.1	p.0,1	-	1	Eurofins	SFBA0-7
31	18.3392	54.6727	227/18/2047	2018-08-21	Bitertanol	µg/dm3	0.1	p.0,1	-	1	Eurofins	SFBA0-7
31	18.3392	54.6727	227/18/2047	2018-08-21	Boskalid	µg/dm3	0.1	p.0,1	-	1	Eurofins	SFBA0-7
31	18.3392	54.6727	227/18/2047	2018-08-21	Bromofenvinphos	µg/dm3	0.1	p.0,1	-	1	Eurofins	SFBA0-7
31	18.3392	54.6727	227/18/2047	2018-08-21	Bromocyclen	µg/dm3	0.1	p.0,1	-	1	Eurofins	SFBA0-7
31	18.3392	54.6727	227/18/2047	2018-08-21	Bromofos metylowy	µg/dm3	0.1	p.0,1	-	1	Eurofins	SFBA0-7
31	18.3392	54.6727	227/18/2047	2018-08-21	Bromofos etylowy	µg/dm3	0.1	p.0,1	-	1	Eurofins	SFBA0-7
31	18.3392	54.6727	227/18/2047	2018-08-21	Bromopropylat	µg/dm3	0.1	p.0,1	-	1	Eurofins	SFBA0-7
31	18.3392	54.6727	227/18/2047	2018-08-21	Buprofezyna	µg/dm3	0.1	p.0,1	-	1	Eurofins	SFBA0-7
31	18.3392	54.6727	227/18/2047	2018-08-21	Butachlor	µg/dm3	0.1	p.0,1	-	1	Eurofins	SFBA0-7
31	18.3392	54.6727	227/18/2047	2018-08-21	Butamifos	µg/dm3	0.1	p.0,1	-	1	Eurofins	SFBA0-7
31	18.3392	54.6727	227/18/2047	2018-08-21	Butralin	µg/dm3	0.1	p.0,1	-	1	Eurofins	SFBA0-7
31	18.3392	54.6727	227/18/2047	2018-08-21	Kadusafos	µg/dm3	0.1	p.0,1	-	1	Eurofins	SFBA0-7
31	18.3392	54.6727	227/18/2047	2018-08-21	Kaptafol	µg/dm3	0.1	p.0,1	-	1	Eurofins	SFBA0-7
31	18.3392	54.6727	227/18/2047	2018-08-21	Kaptan	µg/dm3	0.1	p.0,1	-	1	Eurofins	SFBA0-7
31	18.3392	54.6727	227/18/2047	2018-08-21	Karbofenotion	µg/dm3	0.1	p.0,1	-	1	Eurofins	SFBA0-7
31	18.3392	54.6727	227/18/2047	2018-08-21	Carbophenothion-methyl	µg/dm3	0.1	p.0,1	-	1	Eurofins	SFBA0-7
31	18.3392	54.6727	227/18/2047	2018-08-21	Carfentrazone-ethyl	µg/dm3	0.1	p.0,1	-	1	Eurofins	SFBA0-7
31	18.3392	54.6727	227/18/2047	2018-08-21	Chinometionat	µg/dm3	0.1	p.0,1	-	1	Eurofins	SFBA0-7
31	18.3392	54.6727	227/18/2047	2018-08-21	Chlorbenzyd	µg/dm3	0.1	p.0,1	-	1	Eurofins	SFBA0-7
31	18.3392	54.6727	227/18/2047	2018-08-21	Chlordane (total)	µg/dm3	0.1	p.0,1	-	1	Eurofins	SFBA0-7
31	18.3392	54.6727	227/18/2047	2018-08-21	Chlordan,cis-	µg/dm3	0.1	p.0,1	-	1	Eurofins	SFBA0-7
31	18.3392	54.6727	227/18/2047	2018-08-21	Chlordan,oxy-	µg/dm3	0.1	p.0,1	-	1	Eurofins	SFBA0-7
31	18.3392	54.6727	227/18/2047	2018-08-21	Chlordan,gamma/trans-	µg/dm3	0.1	p.0,1	-	1	Eurofins	SFBA0-7
31	18.3392	54.6727	227/18/2047	2018-08-21	Chlordecon	µg/dm3	0.1	p.0,1	-	1	Eurofins	SFBA0-7
31	18.3392	54.6727	227/18/2047	2018-08-21	Chlorethoksyfos	µg/dm3	0.1	p.0,1	-	1	Eurofins	SFBA0-7
31	18.3392	54.6727	227/18/2047	2018-08-21	Chlorfenapyr	µg/dm3	0.1	p.0,1	-	1	Eurofins	SFBA0-7
31	18.3392	54.6727	227/18/2047	2018-08-21	Chlorfenprop-methyl	µg/dm3	0.1	p.0,1	-	1	Eurofins	SFBA0-7
31	18.3392	54.6727	227/18/2047	2018-08-21	Chlorfenson	µg/dm3	0.1	p.0,1	-	1	Eurofins	SFBA0-7
31	18.3392	54.6727	227/18/2047	2018-08-21	Chlorfenwinfos	µg/dm3	0.1	p.0,1	-	1	Eurofins	SFBA0-7
31	18.3392	54.6727	227/18/2047	2018-08-21	Chloridazon	µg/dm3	0.1	p.0,1	-	1	Eurofins	SFBA0-7
31	18.3392	54.6727	227/18/2047	2018-08-21	Chlormephos	µg/dm3	0.1	p.0,1	-	1	Eurofins	SFBA0-7
31	18.3392	54.6727	227/18/2047	2018-08-21	Chlorobenzylat	µg/dm3	0.1	p.0,1	-	1	Eurofins	SFBA0-7
31	18.3392	54.6727	227/18/2047	2018-08-21	Chloroneb	µg/dm3	0.1	p.0,1	-	1	Eurofins	SFBA0-7
31	18.3392	54.6727	227/18/2047	2018-08-21	Chloropropylat	µg/dm3	0.1	p.0,1	-	1	Eurofins	SFBA0-7
31	18.3392	54.6727	227/18/2047	2018-08-21	Chlorotalonil	µg/dm3	0.1	p.0,1	-	1	Eurofins	SFBA0-7
31	18.3392	54.6727	227/18/2047	2018-08-21	Chlorpiryfos etylowy	µg/dm3	0.1	p.0,1	-	1	Eurofins	SFBA0-7
31	18.3392	54.6727	227/18/2047	2018-08-21	Chlorpiryfos metylowy	µg/dm3	0.1	p.0,1	-	1	Eurofins	SFBA0-7
31	18.3392	54.6727	227/18/2047	2018-08-21	Chlorthal-dimethyl	µg/dm3	0.1	p.0,1	-	1	Eurofins	SFBA0-7
31	18.3392	54.6727	227/18/2047	2018-08-21	Chlorotion	µg/dm3	0.1	p.0,1	-	1	Eurofins	SFBA0-7
31	18.3392	54.6727	227/18/2047	2018-08-21	Chlortiofos	µg/dm3	0.1	p.0,1	-	1	Eurofins	SFBA0-7
31	18.3392	54.6727	227/18/2047	2018-08-21	Chlozolinate	µg/dm3	0.1	p.0,1	-	1	Eurofins	SFBA0-7
31	18.3392	54.6727	227/18/2047	2018-08-21	Cinidon-ethyl	µg/dm3	0.1	p.0,1	-	1	Eurofins	SFBA0-7
31	18.3392	54.6727	227/18/2047	2018-08-21	Clodinafop-propargyl	µg/dm3	0.1	p.0,1	-	1	Eurofins	SFBA0-7
31	18.3392	54.6727	227/18/2047	2018-08-21	Kumafos	µg/dm3	0.1	p.0,1	-	1	Eurofins	SFBA0-7
31	18.3392	54.6727	227/18/2047	2018-08-21	Crotoxyphos	µg/dm3	0.1	p.0,1	-	1	Eurofins	SFBA0-7
31	18.3392	54.6727	227/18/2047	2018-08-21	Cyjanofenfos	µg/dm3	0.1	p.0,1	-	1	Eurofins	SFBA0-7
31	18.3392	54.6727	227/18/2047	2018-08-21	Cyanophos	µg/dm3	0.1	p.0,1	-	1	Eurofins	SFBA0-7
31	18.3392	54.6727	227/18/2047	2018-08-21	Cyflutryna	µg/dm3	0.1	p.0,1	-	1	Eurofins	SFBA0-7
31	18.3392	54.6727	227/18/2047	2018-08-21	lambda-Cyhalotryna	µg/dm3	0.1	p.0,1	-	1	Eurofins	SFBA0-7
31	18.3392	54.6727	227/18/2047	2018-08-21	Cypermetryna	µg/dm3	0.1	p.0,1	-	1	Eurofins	SFBA0-7
31	18.3392	54.6727	227/18/2047	2018-08-21	Cyphenothrin	µg/dm3	0.1	p.0,1	-	1	Eurofins	SFBA0-7
31	18.3392	54.6727	227/18/2047	2018-08-21	Cyprokonazol	µg/dm3	0.1	p.0,1	-	1	Eurofins	SFBA0-7
31	18.3392	54.6727	227/18/2047	2018-08-21	DDD-o,p	µg/dm3	0.1	p.0,1	-	1	Eurofins	SFBA0-7
31	18.3392	54.6727	227/18/2047	2018-08-21	DDE-o,p	µg/dm3	0.1	p.0,1	-	1	Eurofins	SFBA0-7
31	18.3392	54.6727	227/18/2047	2018-08-21	DDT(p,p'-DDT+o,p'-DDT+p.p'-DDE+p,p'-TDE)	µg/dm3	0.1	p.0,1	-	1	Eurofins	SFBA0-7
31	18.3392	54.6727	227/18/2047	2018-08-21	Deltametryna	µg/dm3	0.1	p.0,1	-	1	Eurofins	SFBA0-7
31	18.3392	54.6727	227/18/2047	2018-08-21	Dialifos	µg/dm3	0.1	p.0,1	-	1	Eurofins	SFBA0-7
31	18.3392	54.6727	227/18/2047	2018-08-21	Di-allate	µg/dm3	0.1	p.0,1	-	1	Eurofins	SFBA0-7
31	18.3392	54.6727	227/18/2047	2018-08-21	Diazynon	µg/dm3	0.05	p.0,05	-	1	Eurofins	SFBA0-7
31	18.3392	54.6727	227/18/2047	2018-08-21	4,4-Dibromobenzophenone	µg/dm3	0.1	p.0,1	-	1	Eurofins	SFBA0-7
31	18.3392	54.6727	227/18/2047	2018-08-21	Dicapthon	µg/dm3	0.1	p.0,1	-	1	Eurofins	SFBA0-7
31	18.3392	54.6727	227/18/2047	2018-08-21	Dichlobenil	µg/dm3	0.1	p.0,1	-	1	Eurofins	SFBA0-7
31	18.3392	54.6727	227/18/2047	2018-08-21	Dichlofention	µg/dm3	0.1	p.0,1	-	1	Eurofins	SFBA0-7
31	18.3392	54.6727	227/18/2047	2018-08-21	Dichlofluanid	µg/dm3	0.1	p.0,1	-	1	Eurofins	SFBA0-7
31	18.3392	54.6727	227/18/2047	2018-08-21	Dichloran	µg/dm3	0.1	p.0,1	-	1	Eurofins	SFBA0-7
31	18.3392	54.6727	227/18/2047	2018-08-21	Dichlorfos	µg/dm3	0.1	p.0,1	-	1	Eurofins	SFBA0-7
31	18.3392	54.6727	227/18/2047	2018-08-21	Diclofop-methyl	µg/dm3	0.1	p.0,1	-	1	Eurofins	SFBA0-7
31	18.3392	54.6727	227/18/2047	2018-08-21	Dikofol (suma)	µg/dm3	0.1	p.0,1	-	1	Eurofins	SFBA0-7
31	18.3392	54.6727	227/18/2047	2018-08-21	Dicofol,o,p-	µg/dm3	0.1	p.0,1	-	1	Eurofins	SFBA0-7
31	18.3392	54.6727	227/18/2047	2018-08-21	Dicofol,p,p--	µg/dm3	0.1	p.0,1	-	1	Eurofins	SFBA0-7
31	18.3392	54.6727	227/18/2047	2018-08-21	Dicrotophos	µg/dm3	0.1	p.0,1	-	1	Eurofins	SFBA0-7
31	18.3392	54.6727	227/18/2047	2018-08-21	Dieldryna	µg/dm3	0.03	p.0,03	-	1	Eurofins	SFBA0-7
31	18.3392	54.6727	227/18/2047	2018-08-21	Dienochlor	µg/dm3	0.1	p.0,1	-	1	Eurofins	SFBA0-7
31	18.3392	54.6727	227/18/2047	2018-08-21	Difenokonazol	µg/dm3	0.1	p.0,1	-	1	Eurofins	SFBA0-7
31	18.3392	54.6727	227/18/2047	2018-08-21	Diflufenican	µg/dm3	0.1	p.0,1	-	1	Eurofins	SFBA0-7
31	18.3392	54.6727	227/18/2047	2018-08-21	Dimefox	µg/dm3	0.1	p.0,1	-	1	Eurofins	SFBA0-7
31	18.3392	54.6727	227/18/2047	2018-08-21	Dimetrachlor	µg/dm3	0.1	p.0,1	-	1	Eurofins	SFBA0-7
31	18.3392	54.6727	227/18/2047	2018-08-21	Dimethipine	µg/dm3	0.1	p.0,1	-	1	Eurofins	SFBA0-7
31	18.3392	54.6727	227/18/2047	2018-08-21	Dimetoat	µg/dm3	0.1	p.0,1	-	1	Eurofins	SFBA0-7
31	18.3392	54.6727	227/18/2047	2018-08-21	Dimetomorf	µg/dm3	0.1	p.0,1	-	1	Eurofins	SFBA0-7
31	18.3392	54.6727	227/18/2047	2018-08-21	Dinikonazol	µg/dm3	0.1	p.0,1	-	1	Eurofins	SFBA0-7
31	18.3392	54.6727	227/18/2047	2018-08-21	Dinitramine	µg/dm3	0.1	p.0,1	-	1	Eurofins	SFBA0-7
31	18.3392	54.6727	227/18/2047	2018-08-21	Dinobuton	µg/dm3	0.1	p.0,1	-	1	Eurofins	SFBA0-7
31	18.3392	54.6727	227/18/2047	2018-08-21	Disulfoton	µg/dm3	0.1	p.0,1	-	1	Eurofins	SFBA0-7
31	18.3392	54.6727	227/18/2047	2018-08-21	Disulfoton-sulfon	µg/dm3	0.1	p.0,1	-	1	Eurofins	SFBA0-7
31	18.3392	54.6727	227/18/2047	2018-08-21	Ditalimfos	µg/dm3	0.1	p.0,1	-	1	Eurofins	SFBA0-7
31	18.3392	54.6727	227/18/2047	2018-08-21	Edifenphos	µg/dm3	0.1	p.0,1	-	1	Eurofins	SFBA0-7
31	18.3392	54.6727	227/18/2047	2018-08-21	Endosulfan (suma izomerów)	µg/dm3	0.1	p.0,1	-	1	Eurofins	SFBA0-7
31	18.3392	54.6727	227/18/2047	2018-08-21	alfa-Endosulfan	µg/dm3	0.1	p.0,1	-	1	Eurofins	SFBA0-7
31	18.3392	54.6727	227/18/2047	2018-08-21	Siarczan endosulfanu	µg/dm3	0.1	p.0,1	-	1	Eurofins	SFBA0-7
31	18.3392	54.6727	227/18/2047	2018-08-21	beta-Endosulfan	µg/dm3	0.1	p.0,1	-	1	Eurofins	SFBA0-7
31	18.3392	54.6727	227/18/2047	2018-08-21	Endryna	µg/dm3	0.1	p.0,1	-	1	Eurofins	SFBA0-7
31	18.3392	54.6727	227/18/2047	2018-08-21	Ketoendrin-delta	µg/dm3	0.1	p.0,1	-	1	Eurofins	SFBA0-7
31	18.3392	54.6727	227/18/2047	2018-08-21	EPN	µg/dm3	0.1	p.0,1	-	1	Eurofins	SFBA0-7
31	18.3392	54.6727	227/18/2047	2018-08-21	Epoksykonazol	µg/dm3	0.1	p.0,1	-	1	Eurofins	SFBA0-7
31	18.3392	54.6727	227/18/2047	2018-08-21	Etaconazole	µg/dm3	0.1	p.0,1	-	1	Eurofins	SFBA0-7
31	18.3392	54.6727	227/18/2047	2018-08-21	Ethalfluralin	µg/dm3	0.1	p.0,1	-	1	Eurofins	SFBA0-7
31	18.3392	54.6727	227/18/2047	2018-08-21	Etion	µg/dm3	0.1	p.0,1	-	1	Eurofins	SFBA0-7
31	18.3392	54.6727	227/18/2047	2018-08-21	Ethiprol	µg/dm3	0.1	p.0,1	-	1	Eurofins	SFBA0-7
31	18.3392	54.6727	227/18/2047	2018-08-21	Etofumesat	µg/dm3	0.1	p.0,1	-	1	Eurofins	SFBA0-7
31	18.3392	54.6727	227/18/2047	2018-08-21	Etoprofos	µg/dm3	0.1	p.0,1	-	1	Eurofins	SFBA0-7
31	18.3392	54.6727	227/18/2047	2018-08-21	Etridiazole	µg/dm3	0.1	p.0,1	-	1	Eurofins	SFBA0-7
31	18.3392	54.6727	227/18/2047	2018-08-21	Etrimfos	µg/dm3	0.1	p.0,1	-	1	Eurofins	SFBA0-7
31	18.3392	54.6727	227/18/2047	2018-08-21	Famophos	µg/dm3	0.1	p.0,1	-	1	Eurofins	SFBA0-7
31	18.3392	54.6727	227/18/2047	2018-08-21	Famoksadon	µg/dm3	0.1	p.0,1	-	1	Eurofins	SFBA0-7
31	18.3392	54.6727	227/18/2047	2018-08-21	Fenamidon	µg/dm3	0.1	p.0,1	-	1	Eurofins	SFBA0-7
31	18.3392	54.6727	227/18/2047	2018-08-21	Fenamifos (suma izomerów)	µg/dm3	0.1	p.0,1	-	1	Eurofins	SFBA0-7
31	18.3392	54.6727	227/18/2047	2018-08-21	Fenarimol	µg/dm3	0.1	p.0,1	-	1	Eurofins	SFBA0-7
31	18.3392	54.6727	227/18/2047	2018-08-21	Fenbukonazol	µg/dm3	0.1	p.0,1	-	1	Eurofins	SFBA0-7
31	18.3392	54.6727	227/18/2047	2018-08-21	Fenchlorazole	µg/dm3	0.1	p.0,1	-	1	Eurofins	SFBA0-7
31	18.3392	54.6727	227/18/2047	2018-08-21	Fenchlorofos	µg/dm3	0.1	p.0,1	-	1	Eurofins	SFBA0-7
31	18.3392	54.6727	227/18/2047	2018-08-21	Fenfluthrine	µg/dm3	0.1	p.0,1	-	1	Eurofins	SFBA0-7
31	18.3392	54.6727	227/18/2047	2018-08-21	Fenheksamid	µg/dm3	0.1	p.0,1	-	1	Eurofins	SFBA0-7
31	18.3392	54.6727	227/18/2047	2018-08-21	Fenitrotion	µg/dm3	0.1	p.0,1	-	1	Eurofins	SFBA0-7
31	18.3392	54.6727	227/18/2047	2018-08-21	Fenoxaprop-ethyl	µg/dm3	0.1	p.0,1	-	1	Eurofins	SFBA0-7
31	18.3392	54.6727	227/18/2047	2018-08-21	Fenpiclonil	µg/dm3	0.1	p.0,1	-	1	Eurofins	SFBA0-7
31	18.3392	54.6727	227/18/2047	2018-08-21	Fenpropatryna	µg/dm3	0.1	p.0,1	-	1	Eurofins	SFBA0-7
31	18.3392	54.6727	227/18/2047	2018-08-21	Fenpropimorf	µg/dm3	0.1	p.0,1	-	1	Eurofins	SFBA0-7
31	18.3392	54.6727	227/18/2047	2018-08-21	Fenson	µg/dm3	0.1	p.0,1	-	1	Eurofins	SFBA0-7
31	18.3392	54.6727	227/18/2047	2018-08-21	Fensulfotion	µg/dm3	0.1	p.0,1	-	1	Eurofins	SFBA0-7
31	18.3392	54.6727	227/18/2047	2018-08-21	Fewalerat (suma izomer ów)	µg/dm3	0.1	p.0,1	-	1	Eurofins	SFBA0-7
31	18.3392	54.6727	227/18/2047	2018-08-21	Fenwalerat	µg/dm3	0.1	p.0,1	-	1	Eurofins	SFBA0-7
31	18.3392	54.6727	227/18/2047	2018-08-21	Fenvalerate(RS-/SR-Izomer)	µg/dm3	0.1	p.0,1	-	1	Eurofins	SFBA0-7
31	18.3392	54.6727	227/18/2047	2018-08-21	Fipronil	µg/dm3	0.1	p.0,1	-	1	Eurofins	SFBA0-7
31	18.3392	54.6727	227/18/2047	2018-08-21	Fipronil,desulfinyl-	µg/dm3	0.1	p.0,1	-	1	Eurofins	SFBA0-7
31	18.3392	54.6727	227/18/2047	2018-08-21	Fipranil+Sulfonmetab.MB46136(suma)	µg/dm3	0.1	p.0,1	-	1	Eurofins	SFBA0-7
31	18.3392	54.6727	227/18/2047	2018-08-21	Fipronil sulfid	µg/dm3	0.1	p.0,1	-	1	Eurofins	SFBA0-7
31	18.3392	54.6727	227/18/2047	2018-08-21	Fipronil sulfon	µg/dm3	0.1	p.0,1	-	1	Eurofins	SFBA0-7
31	18.3392	54.6727	227/18/2047	2018-08-21	Flamprop-isopropyl	µg/dm3	0.1	p.0,1	-	1	Eurofins	SFBA0-7
31	18.3392	54.6727	227/18/2047	2018-08-21	Flamprop-methyl	µg/dm3	0.1	p.0,1	-	1	Eurofins	SFBA0-7
31	18.3392	54.6727	227/18/2047	2018-08-21	Flonikamid	µg/dm3	0.1	p.0,1	-	1	Eurofins	SFBA0-7
31	18.3392	54.6727	227/18/2047	2018-08-21	Fluazifop-butyl	µg/dm3	0.1	p.0,1	-	1	Eurofins	SFBA0-7
31	18.3392	54.6727	227/18/2047	2018-08-21	Fluazinam	µg/dm3	0.1	p.0,1	-	1	Eurofins	SFBA0-7
31	18.3392	54.6727	227/18/2047	2018-08-21	Fluchloralina	µg/dm3	0.1	p.0,1	-	1	Eurofins	SFBA0-7
31	18.3392	54.6727	227/18/2047	2018-08-21	Flucytrynat	µg/dm3	0.1	p.0,1	-	1	Eurofins	SFBA0-7
31	18.3392	54.6727	227/18/2047	2018-08-21	Flufenoksuron	µg/dm3	0.1	p.0,1	-	1	Eurofins	SFBA0-7
31	18.3392	54.6727	227/18/2047	2018-08-21	Flumethrine	µg/dm3	0.1	p.0,1	-	1	Eurofins	SFBA0-7
31	18.3392	54.6727	227/18/2047	2018-08-21	Flumetralin	µg/dm3	0.1	p.0,1	-	1	Eurofins	SFBA0-7
31	18.3392	54.6727	227/18/2047	2018-08-21	Flupikolid	µg/dm3	0.1	p.0,1	-	1	Eurofins	SFBA0-7
31	18.3392	54.6727	227/18/2047	2018-08-21	Fluorodifen	µg/dm3	0.1	p.0,1	-	1	Eurofins	SFBA0-7
31	18.3392	54.6727	227/18/2047	2018-08-21	Fluotrimazole	µg/dm3	0.1	p.0,1	-	1	Eurofins	SFBA0-7
31	18.3392	54.6727	227/18/2047	2018-08-21	Fluchinkonazol	µg/dm3	0.1	p.0,1	-	1	Eurofins	SFBA0-7
31	18.3392	54.6727	227/18/2047	2018-08-21	Flurenol-butyl	µg/dm3	0.1	p.0,1	-	1	Eurofins	SFBA0-7
31	18.3392	54.6727	227/18/2047	2018-08-21	Flurochloridon	µg/dm3	0.1	p.0,1	-	1	Eurofins	SFBA0-7
31	18.3392	54.6727	227/18/2047	2018-08-21	Flurtamone	µg/dm3	0.05	p.0,05	-	1	Eurofins	SFBA0-7
31	18.3392	54.6727	227/18/2047	2018-08-21	Flusilazol	µg/dm3	0.1	p.0,1	-	1	Eurofins	SFBA0-7
31	18.3392	54.6727	227/18/2047	2018-08-21	Folpet	µg/dm3	0.1	p.0,1	-	1	Eurofins	SFBA0-7
31	18.3392	54.6727	227/18/2047	2018-08-21	Fonofos	µg/dm3	0.1	p.0,1	-	1	Eurofins	SFBA0-7
31	18.3392	54.6727	227/18/2047	2018-08-21	Formotion	µg/dm3	0.1	p.0,1	-	1	Eurofins	SFBA0-7
31	18.3392	54.6727	227/18/2047	2018-08-21	Genite	µg/dm3	0.1	p.0,1	-	1	Eurofins	SFBA0-7
31	18.3392	54.6727	227/18/2047	2018-08-21	Halfenprox	µg/dm3	0.1	p.0,1	-	1	Eurofins	SFBA0-7
31	18.3392	54.6727	227/18/2047	2018-08-21	Haloxyfop-Ethoxyethyl	µg/dm3	0.1	p.0,1	-	1	Eurofins	SFBA0-7
31	18.3392	54.6727	227/18/2047	2018-08-21	Haloxyfop-methyl	µg/dm3	0.1	p.0,1	-	1	Eurofins	SFBA0-7
31	18.3392	54.6727	227/18/2047	2018-08-21	HCH (sumaizomerów-bez lindan)	µg/dm3	0.1	p.0,1	-	1	Eurofins	SFBA0-7
31	18.3392	54.6727	227/18/2047	2018-08-21	Alfa-HCH	µg/dm3	0.05	p.0,05	-	1	Eurofins	SFBA0-7
31	18.3392	54.6727	227/18/2047	2018-08-21	Beta-HCH	µg/dm3	0.05	p.0,05	-	1	Eurofins	SFBA0-7
31	18.3392	54.6727	227/18/2047	2018-08-21	Delta-HCH	µg/dm3	0.05	p.0,05	-	1	Eurofins	SFBA0-7
31	18.3392	54.6727	227/18/2047	2018-08-21	Epsilon-HCH	µg/dm3	0.05	p.0,05	-	1	Eurofins	SFBA0-7
31	18.3392	54.6727	227/18/2047	2018-08-21	Lindan(gamma-HCH)	µg/dm3	0.1	p.0,1	-	1	Eurofins	SFBA0-7
31	18.3392	54.6727	227/18/2047	2018-08-21	Heptachlor	µg/dm3	0.03	p.0,03	-	1	Eurofins	SFBA0-7
31	18.3392	54.6727	227/18/2047	2018-08-21	Heptachlor(suma)	µg/dm3	0.03	p.0,03	-	1	Eurofins	SFBA0-7
31	18.3392	54.6727	227/18/2047	2018-08-21	Heptahlor-trans-epoksyd	µg/dm3	0.03	p.0,03	-	1	Eurofins	SFBA0-7
31	18.3392	54.6727	227/18/2047	2018-08-21	Heptahlor-cis-epoksyd	µg/dm3	0.03	p.0,03	-	1	Eurofins	SFBA0-7
31	18.3392	54.6727	227/18/2047	2018-08-21	Heptenofos	µg/dm3	0.1	p.0,1	-	1	Eurofins	SFBA0-7
31	18.3392	54.6727	227/18/2047	2018-08-21	Heksachlorobenzen(HCB)	µg/dm3	0.1	p.0,1	-	1	Eurofins	SFBA0-7
31	18.3392	54.6727	227/18/2047	2018-08-21	Heksakonazol	µg/dm3	0.1	p.0,1	-	1	Eurofins	SFBA0-7
31	18.3392	54.6727	227/18/2047	2018-08-21	Indanofan	µg/dm3	0.1	p.0,1	-	1	Eurofins	SFBA0-7
31	18.3392	54.6727	227/18/2047	2018-08-21	Indoksakarb	µg/dm3	0.1	p.0,1	-	1	Eurofins	SFBA0-7
31	18.3392	54.6727	227/18/2047	2018-08-21	Jodofenfos	µg/dm3	0.1	p.0,1	-	1	Eurofins	SFBA0-7
31	18.3392	54.6727	227/18/2047	2018-08-21	Ioxynil-Octanoate	µg/dm3	0.1	p.0,1	-	1	Eurofins	SFBA0-7
31	18.3392	54.6727	227/18/2047	2018-08-21	Iprobenfos	µg/dm3	0.1	p.0,1	-	1	Eurofins	SFBA0-7
31	18.3392	54.6727	227/18/2047	2018-08-21	Iprodion	µg/dm3	0.1	p.0,1	-	1	Eurofins	SFBA0-7
31	18.3392	54.6727	227/18/2047	2018-08-21	Isazophos	µg/dm3	0.1	p.0,1	-	1	Eurofins	SFBA0-7
31	18.3392	54.6727	227/18/2047	2018-08-21	Isobenzan	µg/dm3	0.1	p.0,1	-	1	Eurofins	SFBA0-7
31	18.3392	54.6727	227/18/2047	2018-08-21	Isocarbofos	µg/dm3	0.1	p.0,1	-	1	Eurofins	SFBA0-7
31	18.3392	54.6727	227/18/2047	2018-08-21	Izodryna	µg/dm3	0.1	p.0,1	-	1	Eurofins	SFBA0-7
31	18.3392	54.6727	227/18/2047	2018-08-21	Izofenfos	µg/dm3	0.1	p.0,1	-	1	Eurofins	SFBA0-7
31	18.3392	54.6727	227/18/2047	2018-08-21	Isofenphos-Methyl	µg/dm3	0.1	p.0,1	-	1	Eurofins	SFBA0-7
31	18.3392	54.6727	227/18/2047	2018-08-21	Isomethiozin	µg/dm3	0.1	p.0,1	-	1	Eurofins	SFBA0-7
31	18.3392	54.6727	227/18/2047	2018-08-21	Isopropalin	µg/dm3	0.1	p.0,1	-	1	Eurofins	SFBA0-7
31	18.3392	54.6727	227/18/2047	2018-08-21	Isoxadifen-ethyl	µg/dm3	0.1	p.0,1	-	1	Eurofins	SFBA0-7
31	18.3392	54.6727	227/18/2047	2018-08-21	Krezoksym-metylu	µg/dm3	0.1	p.0,1	-	1	Eurofins	SFBA0-7
31	18.3392	54.6727	227/18/2047	2018-08-21	Lactofen	µg/dm3	0.1	p.0,1	-	1	Eurofins	SFBA0-7
31	18.3392	54.6727	227/18/2047	2018-08-21	Leptophos	µg/dm3	0.1	p.0,1	-	1	Eurofins	SFBA0-7
31	18.3392	54.6727	227/18/2047	2018-08-21	Lufenuron	µg/dm3	0.1	p.0,1	-	1	Eurofins	SFBA0-7
31	18.3392	54.6727	227/18/2047	2018-08-21	Malaokson	µg/dm3	0.05	p.0,05	-	1	Eurofins	SFBA0-7
31	18.3392	54.6727	227/18/2047	2018-08-21	Malation	µg/dm3	0.1	p.0,1	-	1	Eurofins	SFBA0-7
31	18.3392	54.6727	227/18/2047	2018-08-21	Mekarbam	µg/dm3	0.1	p.0,1	-	1	Eurofins	SFBA0-7
31	18.3392	54.6727	227/18/2047	2018-08-21	Mephosfolan	µg/dm3	0.1	p.0,1	-	1	Eurofins	SFBA0-7
31	18.3392	54.6727	227/18/2047	2018-08-21	Merphos	µg/dm3	0.1	p.0,1	-	1	Eurofins	SFBA0-7
31	18.3392	54.6727	227/18/2047	2018-08-21	Metazachlor	µg/dm3	0.1	p.0,1	-	1	Eurofins	SFBA0-7
31	18.3392	54.6727	227/18/2047	2018-08-21	Metakrifos	µg/dm3	0.1	p.0,1	-	1	Eurofins	SFBA0-7
31	18.3392	54.6727	227/18/2047	2018-08-21	Metydation	µg/dm3	0.1	p.0,1	-	1	Eurofins	SFBA0-7
31	18.3392	54.6727	227/18/2047	2018-08-21	Metoksychlor	µg/dm3	0.1	p.0,1	-	1	Eurofins	SFBA0-7
31	18.3392	54.6727	227/18/2047	2018-08-21	Metolachlor	µg/dm3	0.1	p.0,1	-	1	Eurofins	SFBA0-7
31	18.3392	54.6727	227/18/2047	2018-08-21	Metrafenon	µg/dm3	0.1	p.0,1	-	1	Eurofins	SFBA0-7
31	18.3392	54.6727	227/18/2047	2018-08-21	Metribuzyn	µg/dm3	0.1	p.0,1	-	1	Eurofins	SFBA0-7
31	18.3392	54.6727	227/18/2047	2018-08-21	Mevinfos	µg/dm3	0.1	p.0,1	-	1	Eurofins	SFBA0-7
31	18.3392	54.6727	227/18/2047	2018-08-21	Mirex	µg/dm3	0.1	p.0,1	-	1	Eurofins	SFBA0-7
31	18.3392	54.6727	227/18/2047	2018-08-21	Molinate	µg/dm3	0.1	p.0,1	-	1	Eurofins	SFBA0-7
31	18.3392	54.6727	227/18/2047	2018-08-21	Myklobutanil	µg/dm3	0.1	p.0,1	-	1	Eurofins	SFBA0-7
31	18.3392	54.6727	227/18/2047	2018-08-21	Nitralin	µg/dm3	0.1	p.0,1	-	1	Eurofins	SFBA0-7
31	18.3392	54.6727	227/18/2047	2018-08-21	Nitrapyrin	µg/dm3	0.1	p.0,1	-	1	Eurofins	SFBA0-7
31	18.3392	54.6727	227/18/2047	2018-08-21	Nitrofen	µg/dm3	0.1	p.0,1	-	1	Eurofins	SFBA0-7
31	18.3392	54.6727	227/18/2047	2018-08-21	Nitrothal-isopropyl	µg/dm3	0.1	p.0,1	-	1	Eurofins	SFBA0-7
31	18.3392	54.6727	227/18/2047	2018-08-21	Norflurazon	µg/dm3	0.1	p.0,1	-	1	Eurofins	SFBA0-7
31	18.3392	54.6727	227/18/2047	2018-08-21	Nuarimol	µg/dm3	0.1	p.0,1	-	1	Eurofins	SFBA0-7
31	18.3392	54.6727	227/18/2047	2018-08-21	Ometoat	µg/dm3	0.1	p.0,1	-	1	Eurofins	SFBA0-7
31	18.3392	54.6727	227/18/2047	2018-08-21	Oxadiazon	µg/dm3	0.1	p.0,1	-	1	Eurofins	SFBA0-7
31	18.3392	54.6727	227/18/2047	2018-08-21	Oxydemeton-methyl	µg/dm3	0.1	p.0,1	-	1	Eurofins	SFBA0-7
31	18.3392	54.6727	227/18/2047	2018-08-21	Oksyfluoroten	µg/dm3	0.1	p.0,1	-	1	Eurofins	SFBA0-7
31	18.3392	54.6727	227/18/2047	2018-08-21	Paklobutrazol	µg/dm3	0.1	p.0,1	-	1	Eurofins	SFBA0-7
31	18.3392	54.6727	227/18/2047	2018-08-21	Paraoxon-ethyl	µg/dm3	0.1	p.0,1	-	1	Eurofins	SFBA0-7
31	18.3392	54.6727	227/18/2047	2018-08-21	Paraokson metylowy	µg/dm3	0.1	p.0,1	-	1	Eurofins	SFBA0-7
31	18.3392	54.6727	227/18/2047	2018-08-21	Paration	µg/dm3	0.1	p.0,1	-	1	Eurofins	SFBA0-7
31	18.3392	54.6727	227/18/2047	2018-08-21	Paration metylu	µg/dm3	0.1	p.0,1	-	1	Eurofins	SFBA0-7
31	18.3392	54.6727	227/18/2047	2018-08-21	Paration metylu/Paraokson metylu (suma)	µg/dm3	0.1	p.0,1	-	1	Eurofins	SFBA0-7
31	18.3392	54.6727	227/18/2047	2018-08-21	PCB IUPAC 101	µg/dm3	0.05	p.0,05	-	1	Eurofins	SFBA0-7
31	18.3392	54.6727	227/18/2047	2018-08-21	PCB 118	µg/dm3	0.05	p.0,05	-	1	Eurofins	SFBA0-7
31	18.3392	54.6727	227/18/2047	2018-08-21	PCB 138	µg/dm3	0.05	p.0,05	-	1	Eurofins	SFBA0-7
31	18.3392	54.6727	227/18/2047	2018-08-21	PCB 153	µg/dm3	0.05	p.0,05	-	1	Eurofins	SFBA0-7
31	18.3392	54.6727	227/18/2047	2018-08-21	PCB 180	µg/dm3	0.05	p.0,05	-	1	Eurofins	SFBA0-7
31	18.3392	54.6727	227/18/2047	2018-08-21	PCB 28	µg/dm3	0.05	p.0,05	-	1	Eurofins	SFBA0-7
31	18.3392	54.6727	227/18/2047	2018-08-21	PCB 52	µg/dm3	0.05	p.0,05	-	1	Eurofins	SFBA0-7
31	18.3392	54.6727	227/18/2047	2018-08-21	Penkonazol	µg/dm3	0.1	p.0,1	-	1	Eurofins	SFBA0-7
31	18.3392	54.6727	227/18/2047	2018-08-21	Pendimetalina	µg/dm3	0.1	p.0,1	-	1	Eurofins	SFBA0-7
31	18.3392	54.6727	227/18/2047	2018-08-21	Pentachloranisol	µg/dm3	0.1	p.0,1	-	1	Eurofins	SFBA0-7
31	18.3392	54.6727	227/18/2047	2018-08-21	Pentachloraniline	µg/dm3	0.1	p.0,1	-	1	Eurofins	SFBA0-7
31	18.3392	54.6727	227/18/2047	2018-08-21	Pentachlorobenzen	µg/dm3	0.1	p.0,1	-	1	Eurofins	SFBA0-7
31	18.3392	54.6727	227/18/2047	2018-08-21	Pentachlorothioanisole	µg/dm3	0.1	p.0,1	-	1	Eurofins	SFBA0-7
31	18.3392	54.6727	227/18/2047	2018-08-21	Permetryna	µg/dm3	0.1	p.0,1	-	1	Eurofins	SFBA0-7
31	18.3392	54.6727	227/18/2047	2018-08-21	Pertan	µg/dm3	0.1	p.0,1	-	1	Eurofins	SFBA0-7
31	18.3392	54.6727	227/18/2047	2018-08-21	Phenkapton	µg/dm3	0.1	p.0,1	-	1	Eurofins	SFBA0-7
31	18.3392	54.6727	227/18/2047	2018-08-21	Phenothrin	µg/dm3	0.1	p.0,1	-	1	Eurofins	SFBA0-7
31	18.3392	54.6727	227/18/2047	2018-08-21	Fentoat	µg/dm3	0.1	p.0,1	-	1	Eurofins	SFBA0-7
31	18.3392	54.6727	227/18/2047	2018-08-21	Fosalon	µg/dm3	0.1	p.0,1	-	1	Eurofins	SFBA0-7
31	18.3392	54.6727	227/18/2047	2018-08-21	Phosfolane	µg/dm3	0.1	p.0,1	-	1	Eurofins	SFBA0-7
31	18.3392	54.6727	227/18/2047	2018-08-21	Fosmet	µg/dm3	0.1	p.0,1	-	1	Eurofins	SFBA0-7
31	18.3392	54.6727	227/18/2047	2018-08-21	Picolinafen	µg/dm3	0.1	p.0,1	-	1	Eurofins	SFBA0-7
31	18.3392	54.6727	227/18/2047	2018-08-21	Pikoksystrobina	µg/dm3	0.1	p.0,1	-	1	Eurofins	SFBA0-7
31	18.3392	54.6727	227/18/2047	2018-08-21	Piperophos	µg/dm3	0.1	p.0,1	-	1	Eurofins	SFBA0-7
31	18.3392	54.6727	227/18/2047	2018-08-21	Pirymifos metylowy	µg/dm3	0.1	p.0,1	-	1	Eurofins	SFBA0-7
31	18.3392	54.6727	227/18/2047	2018-08-21	Pirymifos etylu	µg/dm3	0.1	p.0,1	-	1	Eurofins	SFBA0-7
31	18.3392	54.6727	227/18/2047	2018-08-21	Plifenate	µg/dm3	0.1	p.0,1	-	1	Eurofins	SFBA0-7
31	18.3392	54.6727	227/18/2047	2018-08-21	Praletryna	µg/dm3	0.1	p.0,1	-	1	Eurofins	SFBA0-7
31	18.3392	54.6727	227/18/2047	2018-08-21	Procymidon	µg/dm3	0.1	p.0,1	-	1	Eurofins	SFBA0-7
31	18.3392	54.6727	227/18/2047	2018-08-21	Profenfos	µg/dm3	0.1	p.0,1	-	1	Eurofins	SFBA0-7
31	18.3392	54.6727	227/18/2047	2018-08-21	Profluralina	µg/dm3	0.1	p.0,1	-	1	Eurofins	SFBA0-7
31	18.3392	54.6727	227/18/2047	2018-08-21	Propachlor	µg/dm3	0.1	p.0,1	-	1	Eurofins	SFBA0-7
31	18.3392	54.6727	227/18/2047	2018-08-21	Propanil	µg/dm3	0.1	p.0,1	-	1	Eurofins	SFBA0-7
31	18.3392	54.6727	227/18/2047	2018-08-21	Propazyna	µg/dm3	0.1	p.0,1	-	1	Eurofins	SFBA0-7
31	18.3392	54.6727	227/18/2047	2018-08-21	Propetamfos	µg/dm3	0.1	p.0,1	-	1	Eurofins	SFBA0-7
31	18.3392	54.6727	227/18/2047	2018-08-21	Propikonazol	µg/dm3	0.1	p.0,1	-	1	Eurofins	SFBA0-7
31	18.3392	54.6727	227/18/2047	2018-08-21	Propyzamid	µg/dm3	0.1	p.0,1	-	1	Eurofins	SFBA0-7
31	18.3392	54.6727	227/18/2047	2018-08-21	Protiofos	µg/dm3	0.1	p.0,1	-	1	Eurofins	SFBA0-7
31	18.3392	54.6727	227/18/2047	2018-08-21	Prothoat	µg/dm3	0.1	p.0,1	-	1	Eurofins	SFBA0-7
31	18.3392	54.6727	227/18/2047	2018-08-21	Pyraclofos	µg/dm3	0.1	p.0,1	-	1	Eurofins	SFBA0-7
31	18.3392	54.6727	227/18/2047	2018-08-21	Pyraflufen-ethyl	µg/dm3	0.1	p.0,1	-	1	Eurofins	SFBA0-7
31	18.3392	54.6727	227/18/2047	2018-08-21	Pirazofos	µg/dm3	0.1	p.0,1	-	1	Eurofins	SFBA0-7
31	18.3392	54.6727	227/18/2047	2018-08-21	Pyretryny	µg/dm3	0.1	p.0,1	-	1	Eurofins	SFBA0-7
31	18.3392	54.6727	227/18/2047	2018-08-21	Pirydaben	µg/dm3	0.1	p.0,1	-	1	Eurofins	SFBA0-7
31	18.3392	54.6727	227/18/2047	2018-08-21	Pyridaphenthion	µg/dm3	0.1	p.0,1	-	1	Eurofins	SFBA0-7
31	18.3392	54.6727	227/18/2047	2018-08-21	Pyrifenox	µg/dm3	0.1	p.0,1	-	1	Eurofins	SFBA0-7
31	18.3392	54.6727	227/18/2047	2018-08-21	Pirimithate	µg/dm3	0.1	p.0,1	-	1	Eurofins	SFBA0-7
31	18.3392	54.6727	227/18/2047	2018-08-21	Chinalofos	µg/dm3	0.1	p.0,1	-	1	Eurofins	SFBA0-7
31	18.3392	54.6727	227/18/2047	2018-08-21	Chinoksyfen	µg/dm3	0.1	p.0,1	-	1	Eurofins	SFBA0-7
31	18.3392	54.6727	227/18/2047	2018-08-21	Kwintocen	µg/dm3	0.1	p.0,1	-	1	Eurofins	SFBA0-7
31	18.3392	54.6727	227/18/2047	2018-08-21	Quintozene (suma)	µg/dm3	0.1	p.0,1	-	1	Eurofins	SFBA0-7
31	18.3392	54.6727	227/18/2047	2018-08-21	Chizalofop etylowy	µg/dm3	0.1	p.0,1	-	1	Eurofins	SFBA0-7
31	18.3392	54.6727	227/18/2047	2018-08-21	Resmetryna	µg/dm3	0.1	p.0,1	-	1	Eurofins	SFBA0-7
31	18.3392	54.6727	227/18/2047	2018-08-21	S421 Octachlordipropyleter)	µg/dm3	0.1	p.0,1	-	1	Eurofins	SFBA0-7
31	18.3392	54.6727	227/18/2047	2018-08-21	Spiromesifen	µg/dm3	0.1	p.0,1	-	1	Eurofins	SFBA0-7
31	18.3392	54.6727	227/18/2047	2018-08-21	Sulfotep	µg/dm3	0.1	p.0,1	-	1	Eurofins	SFBA0-7
31	18.3392	54.6727	227/18/2047	2018-08-21	Sulprofos	µg/dm3	0.1	p.0,1	-	1	Eurofins	SFBA0-7
31	18.3392	54.6727	227/18/2047	2018-08-21	Swep	µg/dm3	0.1	p.0,1	-	1	Eurofins	SFBA0-7
31	18.3392	54.6727	227/18/2047	2018-08-21	tau-Fluvalinate	µg/dm3	0.1	p.0,1	-	1	Eurofins	SFBA0-7
31	18.3392	54.6727	227/18/2047	2018-08-21	Tebupirimfos	µg/dm3	0.1	p.0,1	-	1	Eurofins	SFBA0-7
31	18.3392	54.6727	227/18/2047	2018-08-21	Technazen	µg/dm3	0.1	p.0,1	-	1	Eurofins	SFBA0-7
31	18.3392	54.6727	227/18/2047	2018-08-21	Teflutryna	µg/dm3	0.1	p.0,1	-	1	Eurofins	SFBA0-7
31	18.3392	54.6727	227/18/2047	2018-08-21	Temephos	µg/dm3	0.1	p.0,1	-	1	Eurofins	SFBA0-7
31	18.3392	54.6727	227/18/2047	2018-08-21	Terbufos	µg/dm3	0.1	p.0,1	-	1	Eurofins	SFBA0-7
31	18.3392	54.6727	227/18/2047	2018-08-21	Tetrachlorwinfos	µg/dm3	0.1	p.0,1	-	1	Eurofins	SFBA0-7
31	18.3392	54.6727	227/18/2047	2018-08-21	Tetrakonazol	µg/dm3	0.1	p.0,1	-	1	Eurofins	SFBA0-7
31	18.3392	54.6727	227/18/2047	2018-08-21	Tetradifon	µg/dm3	0.1	p.0,1	-	1	Eurofins	SFBA0-7
31	18.3392	54.6727	227/18/2047	2018-08-21	Tetrametryna	µg/dm3	0.1	p.0,1	-	1	Eurofins	SFBA0-7
31	18.3392	54.6727	227/18/2047	2018-08-21	Tetrasul	µg/dm3	0.1	p.0,1	-	1	Eurofins	SFBA0-7
31	18.3392	54.6727	227/18/2047	2018-08-21	Tolklofos metylu	µg/dm3	0.1	p.0,1	-	1	Eurofins	SFBA0-7
31	18.3392	54.6727	227/18/2047	2018-08-21	Tolilofluanid	µg/dm3	0.1	p.0,1	-	1	Eurofins	SFBA0-7
31	18.3392	54.6727	227/18/2047	2018-08-21	Toxaphene Parlar 26	µg/dm3	0.05	p.0,05	-	1	Eurofins	SFBA0-7
31	18.3392	54.6727	227/18/2047	2018-08-21	Toxaphene Parlar 50	µg/dm3	0.05	p.0,05	-	1	Eurofins	SFBA0-7
31	18.3392	54.6727	227/18/2047	2018-08-21	Toxaphene Parlar 62	µg/dm3	0.05	p.0,05	-	1	Eurofins	SFBA0-7
31	18.3392	54.6727	227/18/2047	2018-08-21	Transfluthrin	µg/dm3	0.1	p.0,1	-	1	Eurofins	SFBA0-7
31	18.3392	54.6727	227/18/2047	2018-08-21	Triadimefon	µg/dm3	0.1	p.0,1	-	1	Eurofins	SFBA0-7
31	18.3392	54.6727	227/18/2047	2018-08-21	Triadimenol	µg/dm3	0.1	p.0,1	-	1	Eurofins	SFBA0-7
31	18.3392	54.6727	227/18/2047	2018-08-21	Triadimenol/Triadimefon(suma)	µg/dm3	0.1	p.0,1	-	1	Eurofins	SFBA0-7
31	18.3392	54.6727	227/18/2047	2018-08-21	Trialat	µg/dm3	0.1	p.0,1	-	1	Eurofins	SFBA0-7
31	18.3392	54.6727	227/18/2047	2018-08-21	Triamiphos	µg/dm3	0.1	p.0,1	-	1	Eurofins	SFBA0-7
31	18.3392	54.6727	227/18/2047	2018-08-21	Triazofos	µg/dm3	0.1	p.0,1	-	1	Eurofins	SFBA0-7
31	18.3392	54.6727	227/18/2047	2018-08-21	Tribufos	µg/dm3	0.1	p.0,1	-	1	Eurofins	SFBA0-7
31	18.3392	54.6727	227/18/2047	2018-08-21	Trichloronat	µg/dm3	0.1	p.0,1	-	1	Eurofins	SFBA0-7
31	18.3392	54.6727	227/18/2047	2018-08-21	Tridiphane	µg/dm3	0.1	p.0,1	-	1	Eurofins	SFBA0-7
31	18.3392	54.6727	227/18/2047	2018-08-21	Trifloksystrobina	µg/dm3	0.1	p.0,1	-	1	Eurofins	SFBA0-7
31	18.3392	54.6727	227/18/2047	2018-08-21	Trifluralina	µg/dm3	0.1	p.0,1	-	1	Eurofins	SFBA0-7
31	18.3392	54.6727	227/18/2047	2018-08-21	Vamidothion	µg/dm3	0.1	p.0,1	-	1	Eurofins	SFBA0-7
31	18.3392	54.6727	227/18/2047	2018-08-21	Winklozolina	µg/dm3	0.1	p.0,1	-	1	Eurofins	SFBA0-7
56	18.3643	54.6602	227/18/2048	2018-08-21	α - HCH	µg/dm3	0.002	p.0,002	-	1	M. Wojtkiewicz	PN-EN 16693:2015-12
56	18.3643	54.6602	227/18/2048	2018-08-21	β - HCH	µg/dm3	0.002	p.0,002	-	1	M. Wojtkiewicz	PN-EN 16693:2015-12
56	18.3643	54.6602	227/18/2048	2018-08-21	γ - HCH	µg/dm3	0.002	p.0,002	-	1	M. Wojtkiewicz	PN-EN 16693:2015-12
56	18.3643	54.6602	227/18/2048	2018-08-21	δ - HCH	µg/dm3	0.002	p.0,002	-	1	M. Wojtkiewicz	PN-EN 16693:2015-12
56	18.3643	54.6602	227/18/2048	2018-08-21	Aldryna	µg/dm3	0.005	p.0,005	-	1	M. Wojtkiewicz	PN-EN 16693:2015-12
56	18.3643	54.6602	227/18/2048	2018-08-21	Izodryna	µg/dm3	0.005	p.0,005	-	1	M. Wojtkiewicz	PN-EN 16693:2015-12
56	18.3643	54.6602	227/18/2048	2018-08-21	Dieldryna	µg/dm3	0.005	p.0,005	-	1	M. Wojtkiewicz	PN-EN 16693:2015-12
56	18.3643	54.6602	227/18/2048	2018-08-21	Endryna	µg/dm3	0.005	p.0,005	-	1	M. Wojtkiewicz	PN-EN 16693:2015-12
56	18.3643	54.6602	227/18/2048	2018-08-21	DDE	µg/dm3	0.01	p.0,01	-	1	M. Wojtkiewicz	PN-EN 16693:2015-12
56	18.3643	54.6602	227/18/2048	2018-08-21	DDD	µg/dm3	0.01	p.0,01	-	1	M. Wojtkiewicz	PN-EN 16693:2015-12
56	18.3643	54.6602	227/18/2048	2018-08-21	DDT	µg/dm3	0.01	p.0,01	-	1	M. Wojtkiewicz	PN-EN 16693:2015-12
56	18.3643	54.6602	227/18/2048	2018-08-21	2,4,5-T-Methylester	µg/dm3	0.1	p.0,1	-	1	Eurofins	SFBA0-7
56	18.3643	54.6602	227/18/2048	2018-08-21	2,4-D-Methylester	µg/dm3	0.1	p.0,1	-	1	Eurofins	SFBA0-7
56	18.3643	54.6602	227/18/2048	2018-08-21	Acetochlor	µg/dm3	0.1	p.0,1	-	1	Eurofins	SFBA0-7
56	18.3643	54.6602	227/18/2048	2018-08-21	Aclonifen	µg/dm3	0.1	p.0,1	-	1	Eurofins	SFBA0-7
56	18.3643	54.6602	227/18/2048	2018-08-21	Akrynatryna	µg/dm3	0.1	p.0,1	-	1	Eurofins	SFBA0-7
56	18.3643	54.6602	227/18/2048	2018-08-21	Alachlor	µg/dm3	0.1	p.0,1	-	1	Eurofins	SFBA0-7
56	18.3643	54.6602	227/18/2048	2018-08-21	Aldryna	µg/dm3	0.03	p.0,03	-	1	Eurofins	SFBA0-7
56	18.3643	54.6602	227/18/2048	2018-08-21	Aldryna+Dieldryna	µg/dm3	0.1	p.0,1	-	1	Eurofins	SFBA0-7
56	18.3643	54.6602	227/18/2048	2018-08-21	Alletryna	µg/dm3	0.1	p.0,1	-	1	Eurofins	SFBA0-7
56	18.3643	54.6602	227/18/2048	2018-08-21	Amidithion	µg/dm3	0.1	p.0,1	-	1	Eurofins	SFBA0-7
56	18.3643	54.6602	227/18/2048	2018-08-21	Antrachinon	µg/dm3	0.1	p.0,1	-	1	Eurofins	SFBA0-7
56	18.3643	54.6602	227/18/2048	2018-08-21	Atrazyna	µg/dm3	0.1	p.0,1	-	1	Eurofins	SFBA0-7
56	18.3643	54.6602	227/18/2048	2018-08-21	Azakonazol	µg/dm3	0.1	p.0,1	-	1	Eurofins	SFBA0-7
56	18.3643	54.6602	227/18/2048	2018-08-21	Azynofos etylowy	µg/dm3	0.1	p.0,1	-	1	Eurofins	SFBA0-7
56	18.3643	54.6602	227/18/2048	2018-08-21	Azynofos metylowy	µg/dm3	0.1	p.0,1	-	1	Eurofins	SFBA0-7
56	18.3643	54.6602	227/18/2048	2018-08-21	Azoksystrobina	µg/dm3	0.1	p.0,1	-	1	Eurofins	SFBA0-7
56	18.3643	54.6602	227/18/2048	2018-08-21	Benfluralin	µg/dm3	0.1	p.0,1	-	1	Eurofins	SFBA0-7
56	18.3643	54.6602	227/18/2048	2018-08-21	Benoxacor	µg/dm3	0.1	p.0,1	-	1	Eurofins	SFBA0-7
56	18.3643	54.6602	227/18/2048	2018-08-21	Benzoylprop-ethyl	µg/dm3	0.1	p.0,1	-	1	Eurofins	SFBA0-7
56	18.3643	54.6602	227/18/2048	2018-08-21	Biofenox	µg/dm3	0.1	p.0,1	-	1	Eurofins	SFBA0-7
56	18.3643	54.6602	227/18/2048	2018-08-21	Binapacryl	µg/dm3	0.1	p.0,1	-	1	Eurofins	SFBA0-7
56	18.3643	54.6602	227/18/2048	2018-08-21	Bifentryna	µg/dm3	0.1	p.0,1	-	1	Eurofins	SFBA0-7
56	18.3643	54.6602	227/18/2048	2018-08-21	Bitertanol	µg/dm3	0.1	p.0,1	-	1	Eurofins	SFBA0-7
56	18.3643	54.6602	227/18/2048	2018-08-21	Boskalid	µg/dm3	0.1	p.0,1	-	1	Eurofins	SFBA0-7
56	18.3643	54.6602	227/18/2048	2018-08-21	Bromofenvinphos	µg/dm3	0.1	p.0,1	-	1	Eurofins	SFBA0-7
56	18.3643	54.6602	227/18/2048	2018-08-21	Bromocyclen	µg/dm3	0.1	p.0,1	-	1	Eurofins	SFBA0-7
56	18.3643	54.6602	227/18/2048	2018-08-21	Bromofos metylowy	µg/dm3	0.1	p.0,1	-	1	Eurofins	SFBA0-7
56	18.3643	54.6602	227/18/2048	2018-08-21	Bromofos etylowy	µg/dm3	0.1	p.0,1	-	1	Eurofins	SFBA0-7
56	18.3643	54.6602	227/18/2048	2018-08-21	Bromopropylat	µg/dm3	0.1	p.0,1	-	1	Eurofins	SFBA0-7
56	18.3643	54.6602	227/18/2048	2018-08-21	Buprofezyna	µg/dm3	0.1	p.0,1	-	1	Eurofins	SFBA0-7
56	18.3643	54.6602	227/18/2048	2018-08-21	Butachlor	µg/dm3	0.1	p.0,1	-	1	Eurofins	SFBA0-7
56	18.3643	54.6602	227/18/2048	2018-08-21	Butamifos	µg/dm3	0.1	p.0,1	-	1	Eurofins	SFBA0-7
56	18.3643	54.6602	227/18/2048	2018-08-21	Butralin	µg/dm3	0.1	p.0,1	-	1	Eurofins	SFBA0-7
56	18.3643	54.6602	227/18/2048	2018-08-21	Kadusafos	µg/dm3	0.1	p.0,1	-	1	Eurofins	SFBA0-7
56	18.3643	54.6602	227/18/2048	2018-08-21	Kaptafol	µg/dm3	0.1	p.0,1	-	1	Eurofins	SFBA0-7
56	18.3643	54.6602	227/18/2048	2018-08-21	Kaptan	µg/dm3	0.1	p.0,1	-	1	Eurofins	SFBA0-7
56	18.3643	54.6602	227/18/2048	2018-08-21	Karbofenotion	µg/dm3	0.1	p.0,1	-	1	Eurofins	SFBA0-7
56	18.3643	54.6602	227/18/2048	2018-08-21	Carbophenothion-methyl	µg/dm3	0.1	p.0,1	-	1	Eurofins	SFBA0-7
56	18.3643	54.6602	227/18/2048	2018-08-21	Carfentrazone-ethyl	µg/dm3	0.1	p.0,1	-	1	Eurofins	SFBA0-7
56	18.3643	54.6602	227/18/2048	2018-08-21	Chinometionat	µg/dm3	0.1	p.0,1	-	1	Eurofins	SFBA0-7
56	18.3643	54.6602	227/18/2048	2018-08-21	Chlorbenzyd	µg/dm3	0.1	p.0,1	-	1	Eurofins	SFBA0-7
56	18.3643	54.6602	227/18/2048	2018-08-21	Chlordane (total)	µg/dm3	0.1	p.0,1	-	1	Eurofins	SFBA0-7
56	18.3643	54.6602	227/18/2048	2018-08-21	Chlordan,cis-	µg/dm3	0.1	p.0,1	-	1	Eurofins	SFBA0-7
56	18.3643	54.6602	227/18/2048	2018-08-21	Chlordan,oxy-	µg/dm3	0.1	p.0,1	-	1	Eurofins	SFBA0-7
56	18.3643	54.6602	227/18/2048	2018-08-21	Chlordan,gamma/trans-	µg/dm3	0.1	p.0,1	-	1	Eurofins	SFBA0-7
56	18.3643	54.6602	227/18/2048	2018-08-21	Chlordecon	µg/dm3	0.1	p.0,1	-	1	Eurofins	SFBA0-7
56	18.3643	54.6602	227/18/2048	2018-08-21	Chlorethoksyfos	µg/dm3	0.1	p.0,1	-	1	Eurofins	SFBA0-7
56	18.3643	54.6602	227/18/2048	2018-08-21	Chlorfenapyr	µg/dm3	0.1	p.0,1	-	1	Eurofins	SFBA0-7
56	18.3643	54.6602	227/18/2048	2018-08-21	Chlorfenprop-methyl	µg/dm3	0.1	p.0,1	-	1	Eurofins	SFBA0-7
56	18.3643	54.6602	227/18/2048	2018-08-21	Chlorfenson	µg/dm3	0.1	p.0,1	-	1	Eurofins	SFBA0-7
56	18.3643	54.6602	227/18/2048	2018-08-21	Chlorfenwinfos	µg/dm3	0.1	p.0,1	-	1	Eurofins	SFBA0-7
56	18.3643	54.6602	227/18/2048	2018-08-21	Chloridazon	µg/dm3	0.1	p.0,1	-	1	Eurofins	SFBA0-7
56	18.3643	54.6602	227/18/2048	2018-08-21	Chlormephos	µg/dm3	0.1	p.0,1	-	1	Eurofins	SFBA0-7
56	18.3643	54.6602	227/18/2048	2018-08-21	Chlorobenzylat	µg/dm3	0.1	p.0,1	-	1	Eurofins	SFBA0-7
56	18.3643	54.6602	227/18/2048	2018-08-21	Chloroneb	µg/dm3	0.1	p.0,1	-	1	Eurofins	SFBA0-7
56	18.3643	54.6602	227/18/2048	2018-08-21	Chloropropylat	µg/dm3	0.1	p.0,1	-	1	Eurofins	SFBA0-7
56	18.3643	54.6602	227/18/2048	2018-08-21	Chlorotalonil	µg/dm3	0.1	p.0,1	-	1	Eurofins	SFBA0-7
56	18.3643	54.6602	227/18/2048	2018-08-21	Chlorpiryfos etylowy	µg/dm3	0.1	p.0,1	-	1	Eurofins	SFBA0-7
56	18.3643	54.6602	227/18/2048	2018-08-21	Chlorpiryfos metylowy	µg/dm3	0.1	p.0,1	-	1	Eurofins	SFBA0-7
56	18.3643	54.6602	227/18/2048	2018-08-21	Chlorthal-dimethyl	µg/dm3	0.1	p.0,1	-	1	Eurofins	SFBA0-7
56	18.3643	54.6602	227/18/2048	2018-08-21	Chlorotion	µg/dm3	0.1	p.0,1	-	1	Eurofins	SFBA0-7
56	18.3643	54.6602	227/18/2048	2018-08-21	Chlortiofos	µg/dm3	0.1	p.0,1	-	1	Eurofins	SFBA0-7
56	18.3643	54.6602	227/18/2048	2018-08-21	Chlozolinate	µg/dm3	0.1	p.0,1	-	1	Eurofins	SFBA0-7
56	18.3643	54.6602	227/18/2048	2018-08-21	Cinidon-ethyl	µg/dm3	0.1	p.0,1	-	1	Eurofins	SFBA0-7
56	18.3643	54.6602	227/18/2048	2018-08-21	Clodinafop-propargyl	µg/dm3	0.1	p.0,1	-	1	Eurofins	SFBA0-7
56	18.3643	54.6602	227/18/2048	2018-08-21	Kumafos	µg/dm3	0.1	p.0,1	-	1	Eurofins	SFBA0-7
56	18.3643	54.6602	227/18/2048	2018-08-21	Crotoxyphos	µg/dm3	0.1	p.0,1	-	1	Eurofins	SFBA0-7
56	18.3643	54.6602	227/18/2048	2018-08-21	Cyjanofenfos	µg/dm3	0.1	p.0,1	-	1	Eurofins	SFBA0-7
56	18.3643	54.6602	227/18/2048	2018-08-21	Cyanophos	µg/dm3	0.1	p.0,1	-	1	Eurofins	SFBA0-7
56	18.3643	54.6602	227/18/2048	2018-08-21	Cyflutryna	µg/dm3	0.1	p.0,1	-	1	Eurofins	SFBA0-7
56	18.3643	54.6602	227/18/2048	2018-08-21	lambda-Cyhalotryna	µg/dm3	0.1	p.0,1	-	1	Eurofins	SFBA0-7
56	18.3643	54.6602	227/18/2048	2018-08-21	Cypermetryna	µg/dm3	0.1	p.0,1	-	1	Eurofins	SFBA0-7
56	18.3643	54.6602	227/18/2048	2018-08-21	Cyphenothrin	µg/dm3	0.1	p.0,1	-	1	Eurofins	SFBA0-7
56	18.3643	54.6602	227/18/2048	2018-08-21	Cyprokonazol	µg/dm3	0.1	p.0,1	-	1	Eurofins	SFBA0-7
56	18.3643	54.6602	227/18/2048	2018-08-21	DDD-o,p	µg/dm3	0.1	p.0,1	-	1	Eurofins	SFBA0-7
56	18.3643	54.6602	227/18/2048	2018-08-21	DDE-o,p	µg/dm3	0.1	p.0,1	-	1	Eurofins	SFBA0-7
56	18.3643	54.6602	227/18/2048	2018-08-21	DDT(p,p'-DDT+o,p'-DDT+p.p'-DDE+p,p'-TDE)	µg/dm3	0.1	p.0,1	-	1	Eurofins	SFBA0-7
56	18.3643	54.6602	227/18/2048	2018-08-21	Deltametryna	µg/dm3	0.1	p.0,1	-	1	Eurofins	SFBA0-7
56	18.3643	54.6602	227/18/2048	2018-08-21	Dialifos	µg/dm3	0.1	p.0,1	-	1	Eurofins	SFBA0-7
56	18.3643	54.6602	227/18/2048	2018-08-21	Di-allate	µg/dm3	0.1	p.0,1	-	1	Eurofins	SFBA0-7
56	18.3643	54.6602	227/18/2048	2018-08-21	Diazynon	µg/dm3	0.05	p.0,05	-	1	Eurofins	SFBA0-7
56	18.3643	54.6602	227/18/2048	2018-08-21	4,4-Dibromobenzophenone	µg/dm3	0.1	p.0,1	-	1	Eurofins	SFBA0-7
56	18.3643	54.6602	227/18/2048	2018-08-21	Dicapthon	µg/dm3	0.1	p.0,1	-	1	Eurofins	SFBA0-7
56	18.3643	54.6602	227/18/2048	2018-08-21	Dichlobenil	µg/dm3	0.1	p.0,1	-	1	Eurofins	SFBA0-7
56	18.3643	54.6602	227/18/2048	2018-08-21	Dichlofention	µg/dm3	0.1	p.0,1	-	1	Eurofins	SFBA0-7
56	18.3643	54.6602	227/18/2048	2018-08-21	Dichlofluanid	µg/dm3	0.1	p.0,1	-	1	Eurofins	SFBA0-7
56	18.3643	54.6602	227/18/2048	2018-08-21	Dichloran	µg/dm3	0.1	p.0,1	-	1	Eurofins	SFBA0-7
56	18.3643	54.6602	227/18/2048	2018-08-21	Dichlorfos	µg/dm3	0.1	p.0,1	-	1	Eurofins	SFBA0-7
56	18.3643	54.6602	227/18/2048	2018-08-21	Diclofop-methyl	µg/dm3	0.1	p.0,1	-	1	Eurofins	SFBA0-7
56	18.3643	54.6602	227/18/2048	2018-08-21	Dikofol (suma)	µg/dm3	0.1	p.0,1	-	1	Eurofins	SFBA0-7
56	18.3643	54.6602	227/18/2048	2018-08-21	Dicofol,o,p-	µg/dm3	0.1	p.0,1	-	1	Eurofins	SFBA0-7
56	18.3643	54.6602	227/18/2048	2018-08-21	Dicofol,p,p--	µg/dm3	0.1	p.0,1	-	1	Eurofins	SFBA0-7
56	18.3643	54.6602	227/18/2048	2018-08-21	Dicrotophos	µg/dm3	0.1	p.0,1	-	1	Eurofins	SFBA0-7
56	18.3643	54.6602	227/18/2048	2018-08-21	Dieldryna	µg/dm3	0.03	p.0,03	-	1	Eurofins	SFBA0-7
56	18.3643	54.6602	227/18/2048	2018-08-21	Dienochlor	µg/dm3	0.1	p.0,1	-	1	Eurofins	SFBA0-7
56	18.3643	54.6602	227/18/2048	2018-08-21	Difenokonazol	µg/dm3	0.1	p.0,1	-	1	Eurofins	SFBA0-7
56	18.3643	54.6602	227/18/2048	2018-08-21	Diflufenican	µg/dm3	0.1	p.0,1	-	1	Eurofins	SFBA0-7
56	18.3643	54.6602	227/18/2048	2018-08-21	Dimefox	µg/dm3	0.1	p.0,1	-	1	Eurofins	SFBA0-7
56	18.3643	54.6602	227/18/2048	2018-08-21	Dimetrachlor	µg/dm3	0.1	p.0,1	-	1	Eurofins	SFBA0-7
56	18.3643	54.6602	227/18/2048	2018-08-21	Dimethipine	µg/dm3	0.1	p.0,1	-	1	Eurofins	SFBA0-7
56	18.3643	54.6602	227/18/2048	2018-08-21	Dimetoat	µg/dm3	0.1	p.0,1	-	1	Eurofins	SFBA0-7
56	18.3643	54.6602	227/18/2048	2018-08-21	Dimetomorf	µg/dm3	0.1	p.0,1	-	1	Eurofins	SFBA0-7
56	18.3643	54.6602	227/18/2048	2018-08-21	Dinikonazol	µg/dm3	0.1	p.0,1	-	1	Eurofins	SFBA0-7
56	18.3643	54.6602	227/18/2048	2018-08-21	Dinitramine	µg/dm3	0.1	p.0,1	-	1	Eurofins	SFBA0-7
56	18.3643	54.6602	227/18/2048	2018-08-21	Dinobuton	µg/dm3	0.1	p.0,1	-	1	Eurofins	SFBA0-7
56	18.3643	54.6602	227/18/2048	2018-08-21	Disulfoton	µg/dm3	0.1	p.0,1	-	1	Eurofins	SFBA0-7
56	18.3643	54.6602	227/18/2048	2018-08-21	Disulfoton-sulfon	µg/dm3	0.1	p.0,1	-	1	Eurofins	SFBA0-7
56	18.3643	54.6602	227/18/2048	2018-08-21	Ditalimfos	µg/dm3	0.1	p.0,1	-	1	Eurofins	SFBA0-7
56	18.3643	54.6602	227/18/2048	2018-08-21	Edifenphos	µg/dm3	0.1	p.0,1	-	1	Eurofins	SFBA0-7
56	18.3643	54.6602	227/18/2048	2018-08-21	Endosulfan (suma izomerów)	µg/dm3	0.1	p.0,1	-	1	Eurofins	SFBA0-7
56	18.3643	54.6602	227/18/2048	2018-08-21	alfa-Endosulfan	µg/dm3	0.1	p.0,1	-	1	Eurofins	SFBA0-7
56	18.3643	54.6602	227/18/2048	2018-08-21	Siarczan endosulfanu	µg/dm3	0.1	p.0,1	-	1	Eurofins	SFBA0-7
56	18.3643	54.6602	227/18/2048	2018-08-21	beta-Endosulfan	µg/dm3	0.1	p.0,1	-	1	Eurofins	SFBA0-7
56	18.3643	54.6602	227/18/2048	2018-08-21	Endryna	µg/dm3	0.1	p.0,1	-	1	Eurofins	SFBA0-7
56	18.3643	54.6602	227/18/2048	2018-08-21	Ketoendrin-delta	µg/dm3	0.1	p.0,1	-	1	Eurofins	SFBA0-7
56	18.3643	54.6602	227/18/2048	2018-08-21	EPN	µg/dm3	0.1	p.0,1	-	1	Eurofins	SFBA0-7
56	18.3643	54.6602	227/18/2048	2018-08-21	Epoksykonazol	µg/dm3	0.1	p.0,1	-	1	Eurofins	SFBA0-7
56	18.3643	54.6602	227/18/2048	2018-08-21	Etaconazole	µg/dm3	0.1	p.0,1	-	1	Eurofins	SFBA0-7
56	18.3643	54.6602	227/18/2048	2018-08-21	Ethalfluralin	µg/dm3	0.1	p.0,1	-	1	Eurofins	SFBA0-7
56	18.3643	54.6602	227/18/2048	2018-08-21	Etion	µg/dm3	0.1	p.0,1	-	1	Eurofins	SFBA0-7
56	18.3643	54.6602	227/18/2048	2018-08-21	Ethiprol	µg/dm3	0.1	p.0,1	-	1	Eurofins	SFBA0-7
56	18.3643	54.6602	227/18/2048	2018-08-21	Etofumesat	µg/dm3	0.1	p.0,1	-	1	Eurofins	SFBA0-7
56	18.3643	54.6602	227/18/2048	2018-08-21	Etoprofos	µg/dm3	0.1	p.0,1	-	1	Eurofins	SFBA0-7
56	18.3643	54.6602	227/18/2048	2018-08-21	Etridiazole	µg/dm3	0.1	p.0,1	-	1	Eurofins	SFBA0-7
56	18.3643	54.6602	227/18/2048	2018-08-21	Etrimfos	µg/dm3	0.1	p.0,1	-	1	Eurofins	SFBA0-7
56	18.3643	54.6602	227/18/2048	2018-08-21	Famophos	µg/dm3	0.1	p.0,1	-	1	Eurofins	SFBA0-7
56	18.3643	54.6602	227/18/2048	2018-08-21	Famoksadon	µg/dm3	0.1	p.0,1	-	1	Eurofins	SFBA0-7
56	18.3643	54.6602	227/18/2048	2018-08-21	Fenamidon	µg/dm3	0.1	p.0,1	-	1	Eurofins	SFBA0-7
56	18.3643	54.6602	227/18/2048	2018-08-21	Fenamifos (suma izomerów)	µg/dm3	0.1	p.0,1	-	1	Eurofins	SFBA0-7
56	18.3643	54.6602	227/18/2048	2018-08-21	Fenarimol	µg/dm3	0.1	p.0,1	-	1	Eurofins	SFBA0-7
56	18.3643	54.6602	227/18/2048	2018-08-21	Fenbukonazol	µg/dm3	0.1	p.0,1	-	1	Eurofins	SFBA0-7
56	18.3643	54.6602	227/18/2048	2018-08-21	Fenchlorazole	µg/dm3	0.1	p.0,1	-	1	Eurofins	SFBA0-7
56	18.3643	54.6602	227/18/2048	2018-08-21	Fenchlorofos	µg/dm3	0.1	p.0,1	-	1	Eurofins	SFBA0-7
56	18.3643	54.6602	227/18/2048	2018-08-21	Fenfluthrine	µg/dm3	0.1	p.0,1	-	1	Eurofins	SFBA0-7
56	18.3643	54.6602	227/18/2048	2018-08-21	Fenheksamid	µg/dm3	0.1	p.0,1	-	1	Eurofins	SFBA0-7
56	18.3643	54.6602	227/18/2048	2018-08-21	Fenitrotion	µg/dm3	0.1	p.0,1	-	1	Eurofins	SFBA0-7
56	18.3643	54.6602	227/18/2048	2018-08-21	Fenoxaprop-ethyl	µg/dm3	0.1	p.0,1	-	1	Eurofins	SFBA0-7
56	18.3643	54.6602	227/18/2048	2018-08-21	Fenpiclonil	µg/dm3	0.1	p.0,1	-	1	Eurofins	SFBA0-7
56	18.3643	54.6602	227/18/2048	2018-08-21	Fenpropatryna	µg/dm3	0.1	p.0,1	-	1	Eurofins	SFBA0-7
56	18.3643	54.6602	227/18/2048	2018-08-21	Fenpropimorf	µg/dm3	0.1	p.0,1	-	1	Eurofins	SFBA0-7
56	18.3643	54.6602	227/18/2048	2018-08-21	Fenson	µg/dm3	0.1	p.0,1	-	1	Eurofins	SFBA0-7
56	18.3643	54.6602	227/18/2048	2018-08-21	Fensulfotion	µg/dm3	0.1	p.0,1	-	1	Eurofins	SFBA0-7
56	18.3643	54.6602	227/18/2048	2018-08-21	Fewalerat (suma izomer ów)	µg/dm3	0.1	p.0,1	-	1	Eurofins	SFBA0-7
56	18.3643	54.6602	227/18/2048	2018-08-21	Fenwalerat	µg/dm3	0.1	p.0,1	-	1	Eurofins	SFBA0-7
56	18.3643	54.6602	227/18/2048	2018-08-21	Fenvalerate(RS-/SR-Izomer)	µg/dm3	0.1	p.0,1	-	1	Eurofins	SFBA0-7
56	18.3643	54.6602	227/18/2048	2018-08-21	Fipronil	µg/dm3	0.1	p.0,1	-	1	Eurofins	SFBA0-7
56	18.3643	54.6602	227/18/2048	2018-08-21	Fipronil,desulfinyl-	µg/dm3	0.1	p.0,1	-	1	Eurofins	SFBA0-7
56	18.3643	54.6602	227/18/2048	2018-08-21	Fipranil+Sulfonmetab.MB46136(suma)	µg/dm3	0.1	p.0,1	-	1	Eurofins	SFBA0-7
56	18.3643	54.6602	227/18/2048	2018-08-21	Fipronil sulfid	µg/dm3	0.1	p.0,1	-	1	Eurofins	SFBA0-7
56	18.3643	54.6602	227/18/2048	2018-08-21	Fipronil sulfon	µg/dm3	0.1	p.0,1	-	1	Eurofins	SFBA0-7
56	18.3643	54.6602	227/18/2048	2018-08-21	Flamprop-isopropyl	µg/dm3	0.1	p.0,1	-	1	Eurofins	SFBA0-7
56	18.3643	54.6602	227/18/2048	2018-08-21	Flamprop-methyl	µg/dm3	0.1	p.0,1	-	1	Eurofins	SFBA0-7
56	18.3643	54.6602	227/18/2048	2018-08-21	Flonikamid	µg/dm3	0.1	p.0,1	-	1	Eurofins	SFBA0-7
56	18.3643	54.6602	227/18/2048	2018-08-21	Fluazifop-butyl	µg/dm3	0.1	p.0,1	-	1	Eurofins	SFBA0-7
56	18.3643	54.6602	227/18/2048	2018-08-21	Fluazinam	µg/dm3	0.1	p.0,1	-	1	Eurofins	SFBA0-7
56	18.3643	54.6602	227/18/2048	2018-08-21	Fluchloralina	µg/dm3	0.1	p.0,1	-	1	Eurofins	SFBA0-7
56	18.3643	54.6602	227/18/2048	2018-08-21	Flucytrynat	µg/dm3	0.1	p.0,1	-	1	Eurofins	SFBA0-7
56	18.3643	54.6602	227/18/2048	2018-08-21	Flufenoksuron	µg/dm3	0.1	p.0,1	-	1	Eurofins	SFBA0-7
56	18.3643	54.6602	227/18/2048	2018-08-21	Flumethrine	µg/dm3	0.1	p.0,1	-	1	Eurofins	SFBA0-7
56	18.3643	54.6602	227/18/2048	2018-08-21	Flumetralin	µg/dm3	0.1	p.0,1	-	1	Eurofins	SFBA0-7
56	18.3643	54.6602	227/18/2048	2018-08-21	Flupikolid	µg/dm3	0.1	p.0,1	-	1	Eurofins	SFBA0-7
56	18.3643	54.6602	227/18/2048	2018-08-21	Fluorodifen	µg/dm3	0.1	p.0,1	-	1	Eurofins	SFBA0-7
56	18.3643	54.6602	227/18/2048	2018-08-21	Fluotrimazole	µg/dm3	0.1	p.0,1	-	1	Eurofins	SFBA0-7
56	18.3643	54.6602	227/18/2048	2018-08-21	Fluchinkonazol	µg/dm3	0.1	p.0,1	-	1	Eurofins	SFBA0-7
56	18.3643	54.6602	227/18/2048	2018-08-21	Flurenol-butyl	µg/dm3	0.1	p.0,1	-	1	Eurofins	SFBA0-7
56	18.3643	54.6602	227/18/2048	2018-08-21	Flurochloridon	µg/dm3	0.1	p.0,1	-	1	Eurofins	SFBA0-7
56	18.3643	54.6602	227/18/2048	2018-08-21	Flurtamone	µg/dm3	0.05	p.0,05	-	1	Eurofins	SFBA0-7
56	18.3643	54.6602	227/18/2048	2018-08-21	Flusilazol	µg/dm3	0.1	p.0,1	-	1	Eurofins	SFBA0-7
56	18.3643	54.6602	227/18/2048	2018-08-21	Folpet	µg/dm3	0.1	p.0,1	-	1	Eurofins	SFBA0-7
56	18.3643	54.6602	227/18/2048	2018-08-21	Fonofos	µg/dm3	0.1	p.0,1	-	1	Eurofins	SFBA0-7
56	18.3643	54.6602	227/18/2048	2018-08-21	Formotion	µg/dm3	0.1	p.0,1	-	1	Eurofins	SFBA0-7
56	18.3643	54.6602	227/18/2048	2018-08-21	Genite	µg/dm3	0.1	p.0,1	-	1	Eurofins	SFBA0-7
56	18.3643	54.6602	227/18/2048	2018-08-21	Halfenprox	µg/dm3	0.1	p.0,1	-	1	Eurofins	SFBA0-7
56	18.3643	54.6602	227/18/2048	2018-08-21	Haloxyfop-Ethoxyethyl	µg/dm3	0.1	p.0,1	-	1	Eurofins	SFBA0-7
56	18.3643	54.6602	227/18/2048	2018-08-21	Haloxyfop-methyl	µg/dm3	0.1	p.0,1	-	1	Eurofins	SFBA0-7
56	18.3643	54.6602	227/18/2048	2018-08-21	HCH (sumaizomerów-bez lindan)	µg/dm3	0.1	p.0,1	-	1	Eurofins	SFBA0-7
56	18.3643	54.6602	227/18/2048	2018-08-21	Alfa-HCH	µg/dm3	0.05	p.0,05	-	1	Eurofins	SFBA0-7
56	18.3643	54.6602	227/18/2048	2018-08-21	Beta-HCH	µg/dm3	0.05	p.0,05	-	1	Eurofins	SFBA0-7
56	18.3643	54.6602	227/18/2048	2018-08-21	Delta-HCH	µg/dm3	0.05	p.0,05	-	1	Eurofins	SFBA0-7
56	18.3643	54.6602	227/18/2048	2018-08-21	Epsilon-HCH	µg/dm3	0.05	p.0,05	-	1	Eurofins	SFBA0-7
56	18.3643	54.6602	227/18/2048	2018-08-21	Lindan(gamma-HCH)	µg/dm3	0.1	p.0,1	-	1	Eurofins	SFBA0-7
56	18.3643	54.6602	227/18/2048	2018-08-21	Heptachlor	µg/dm3	0.03	p.0,03	-	1	Eurofins	SFBA0-7
56	18.3643	54.6602	227/18/2048	2018-08-21	Heptachlor(suma)	µg/dm3	0.03	p.0,03	-	1	Eurofins	SFBA0-7
56	18.3643	54.6602	227/18/2048	2018-08-21	Heptahlor-trans-epoksyd	µg/dm3	0.03	p.0,03	-	1	Eurofins	SFBA0-7
56	18.3643	54.6602	227/18/2048	2018-08-21	Heptahlor-cis-epoksyd	µg/dm3	0.03	p.0,03	-	1	Eurofins	SFBA0-7
56	18.3643	54.6602	227/18/2048	2018-08-21	Heptenofos	µg/dm3	0.1	p.0,1	-	1	Eurofins	SFBA0-7
56	18.3643	54.6602	227/18/2048	2018-08-21	Heksachlorobenzen(HCB)	µg/dm3	0.1	p.0,1	-	1	Eurofins	SFBA0-7
56	18.3643	54.6602	227/18/2048	2018-08-21	Heksakonazol	µg/dm3	0.1	p.0,1	-	1	Eurofins	SFBA0-7
56	18.3643	54.6602	227/18/2048	2018-08-21	Indanofan	µg/dm3	0.1	p.0,1	-	1	Eurofins	SFBA0-7
56	18.3643	54.6602	227/18/2048	2018-08-21	Indoksakarb	µg/dm3	0.1	p.0,1	-	1	Eurofins	SFBA0-7
56	18.3643	54.6602	227/18/2048	2018-08-21	Jodofenfos	µg/dm3	0.1	p.0,1	-	1	Eurofins	SFBA0-7
56	18.3643	54.6602	227/18/2048	2018-08-21	Ioxynil-Octanoate	µg/dm3	0.1	p.0,1	-	1	Eurofins	SFBA0-7
56	18.3643	54.6602	227/18/2048	2018-08-21	Iprobenfos	µg/dm3	0.1	p.0,1	-	1	Eurofins	SFBA0-7
56	18.3643	54.6602	227/18/2048	2018-08-21	Iprodion	µg/dm3	0.1	p.0,1	-	1	Eurofins	SFBA0-7
56	18.3643	54.6602	227/18/2048	2018-08-21	Isazophos	µg/dm3	0.1	p.0,1	-	1	Eurofins	SFBA0-7
56	18.3643	54.6602	227/18/2048	2018-08-21	Isobenzan	µg/dm3	0.1	p.0,1	-	1	Eurofins	SFBA0-7
56	18.3643	54.6602	227/18/2048	2018-08-21	Isocarbofos	µg/dm3	0.1	p.0,1	-	1	Eurofins	SFBA0-7
56	18.3643	54.6602	227/18/2048	2018-08-21	Izodryna	µg/dm3	0.1	p.0,1	-	1	Eurofins	SFBA0-7
56	18.3643	54.6602	227/18/2048	2018-08-21	Izofenfos	µg/dm3	0.1	p.0,1	-	1	Eurofins	SFBA0-7
56	18.3643	54.6602	227/18/2048	2018-08-21	Isofenphos-Methyl	µg/dm3	0.1	p.0,1	-	1	Eurofins	SFBA0-7
56	18.3643	54.6602	227/18/2048	2018-08-21	Isomethiozin	µg/dm3	0.1	p.0,1	-	1	Eurofins	SFBA0-7
56	18.3643	54.6602	227/18/2048	2018-08-21	Isopropalin	µg/dm3	0.1	p.0,1	-	1	Eurofins	SFBA0-7
56	18.3643	54.6602	227/18/2048	2018-08-21	Isoxadifen-ethyl	µg/dm3	0.1	p.0,1	-	1	Eurofins	SFBA0-7
56	18.3643	54.6602	227/18/2048	2018-08-21	Krezoksym-metylu	µg/dm3	0.1	p.0,1	-	1	Eurofins	SFBA0-7
56	18.3643	54.6602	227/18/2048	2018-08-21	Lactofen	µg/dm3	0.1	p.0,1	-	1	Eurofins	SFBA0-7
56	18.3643	54.6602	227/18/2048	2018-08-21	Leptophos	µg/dm3	0.1	p.0,1	-	1	Eurofins	SFBA0-7
56	18.3643	54.6602	227/18/2048	2018-08-21	Lufenuron	µg/dm3	0.1	p.0,1	-	1	Eurofins	SFBA0-7
56	18.3643	54.6602	227/18/2048	2018-08-21	Malaokson	µg/dm3	0.05	p.0,05	-	1	Eurofins	SFBA0-7
56	18.3643	54.6602	227/18/2048	2018-08-21	Malation	µg/dm3	0.1	p.0,1	-	1	Eurofins	SFBA0-7
56	18.3643	54.6602	227/18/2048	2018-08-21	Mekarbam	µg/dm3	0.1	p.0,1	-	1	Eurofins	SFBA0-7
56	18.3643	54.6602	227/18/2048	2018-08-21	Mephosfolan	µg/dm3	0.1	p.0,1	-	1	Eurofins	SFBA0-7
56	18.3643	54.6602	227/18/2048	2018-08-21	Merphos	µg/dm3	0.1	p.0,1	-	1	Eurofins	SFBA0-7
56	18.3643	54.6602	227/18/2048	2018-08-21	Metazachlor	µg/dm3	0.1	p.0,1	-	1	Eurofins	SFBA0-7
56	18.3643	54.6602	227/18/2048	2018-08-21	Metakrifos	µg/dm3	0.1	p.0,1	-	1	Eurofins	SFBA0-7
56	18.3643	54.6602	227/18/2048	2018-08-21	Metydation	µg/dm3	0.1	p.0,1	-	1	Eurofins	SFBA0-7
56	18.3643	54.6602	227/18/2048	2018-08-21	Metoksychlor	µg/dm3	0.1	p.0,1	-	1	Eurofins	SFBA0-7
56	18.3643	54.6602	227/18/2048	2018-08-21	Metolachlor	µg/dm3	0.1	p.0,1	-	1	Eurofins	SFBA0-7
56	18.3643	54.6602	227/18/2048	2018-08-21	Metrafenon	µg/dm3	0.1	p.0,1	-	1	Eurofins	SFBA0-7
56	18.3643	54.6602	227/18/2048	2018-08-21	Metribuzyn	µg/dm3	0.1	p.0,1	-	1	Eurofins	SFBA0-7
56	18.3643	54.6602	227/18/2048	2018-08-21	Mevinfos	µg/dm3	0.1	p.0,1	-	1	Eurofins	SFBA0-7
56	18.3643	54.6602	227/18/2048	2018-08-21	Mirex	µg/dm3	0.1	p.0,1	-	1	Eurofins	SFBA0-7
56	18.3643	54.6602	227/18/2048	2018-08-21	Molinate	µg/dm3	0.1	p.0,1	-	1	Eurofins	SFBA0-7
56	18.3643	54.6602	227/18/2048	2018-08-21	Myklobutanil	µg/dm3	0.1	p.0,1	-	1	Eurofins	SFBA0-7
56	18.3643	54.6602	227/18/2048	2018-08-21	Nitralin	µg/dm3	0.1	p.0,1	-	1	Eurofins	SFBA0-7
56	18.3643	54.6602	227/18/2048	2018-08-21	Nitrapyrin	µg/dm3	0.1	p.0,1	-	1	Eurofins	SFBA0-7
56	18.3643	54.6602	227/18/2048	2018-08-21	Nitrofen	µg/dm3	0.1	p.0,1	-	1	Eurofins	SFBA0-7
56	18.3643	54.6602	227/18/2048	2018-08-21	Nitrothal-isopropyl	µg/dm3	0.1	p.0,1	-	1	Eurofins	SFBA0-7
56	18.3643	54.6602	227/18/2048	2018-08-21	Norflurazon	µg/dm3	0.1	p.0,1	-	1	Eurofins	SFBA0-7
56	18.3643	54.6602	227/18/2048	2018-08-21	Nuarimol	µg/dm3	0.1	p.0,1	-	1	Eurofins	SFBA0-7
56	18.3643	54.6602	227/18/2048	2018-08-21	Ometoat	µg/dm3	0.1	p.0,1	-	1	Eurofins	SFBA0-7
56	18.3643	54.6602	227/18/2048	2018-08-21	Oxadiazon	µg/dm3	0.1	p.0,1	-	1	Eurofins	SFBA0-7
56	18.3643	54.6602	227/18/2048	2018-08-21	Oxydemeton-methyl	µg/dm3	0.1	p.0,1	-	1	Eurofins	SFBA0-7
56	18.3643	54.6602	227/18/2048	2018-08-21	Oksyfluoroten	µg/dm3	0.1	p.0,1	-	1	Eurofins	SFBA0-7
56	18.3643	54.6602	227/18/2048	2018-08-21	Paklobutrazol	µg/dm3	0.1	p.0,1	-	1	Eurofins	SFBA0-7
56	18.3643	54.6602	227/18/2048	2018-08-21	Paraoxon-ethyl	µg/dm3	0.1	p.0,1	-	1	Eurofins	SFBA0-7
56	18.3643	54.6602	227/18/2048	2018-08-21	Paraokson metylowy	µg/dm3	0.1	p.0,1	-	1	Eurofins	SFBA0-7
56	18.3643	54.6602	227/18/2048	2018-08-21	Paration	µg/dm3	0.1	p.0,1	-	1	Eurofins	SFBA0-7
56	18.3643	54.6602	227/18/2048	2018-08-21	Paration metylu	µg/dm3	0.1	p.0,1	-	1	Eurofins	SFBA0-7
56	18.3643	54.6602	227/18/2048	2018-08-21	Paration metylu/Paraokson metylu (suma)	µg/dm3	0.1	p.0,1	-	1	Eurofins	SFBA0-7
56	18.3643	54.6602	227/18/2048	2018-08-21	PCB IUPAC 101	µg/dm3	0.05	p.0,05	-	1	Eurofins	SFBA0-7
56	18.3643	54.6602	227/18/2048	2018-08-21	PCB 118	µg/dm3	0.05	p.0,05	-	1	Eurofins	SFBA0-7
56	18.3643	54.6602	227/18/2048	2018-08-21	PCB 138	µg/dm3	0.05	p.0,05	-	1	Eurofins	SFBA0-7
56	18.3643	54.6602	227/18/2048	2018-08-21	PCB 153	µg/dm3	0.05	p.0,05	-	1	Eurofins	SFBA0-7
56	18.3643	54.6602	227/18/2048	2018-08-21	PCB 180	µg/dm3	0.05	p.0,05	-	1	Eurofins	SFBA0-7
56	18.3643	54.6602	227/18/2048	2018-08-21	PCB 28	µg/dm3	0.05	p.0,05	-	1	Eurofins	SFBA0-7
56	18.3643	54.6602	227/18/2048	2018-08-21	PCB 52	µg/dm3	0.05	p.0,05	-	1	Eurofins	SFBA0-7
56	18.3643	54.6602	227/18/2048	2018-08-21	Penkonazol	µg/dm3	0.1	p.0,1	-	1	Eurofins	SFBA0-7
56	18.3643	54.6602	227/18/2048	2018-08-21	Pendimetalina	µg/dm3	0.1	p.0,1	-	1	Eurofins	SFBA0-7
56	18.3643	54.6602	227/18/2048	2018-08-21	Pentachloranisol	µg/dm3	0.1	p.0,1	-	1	Eurofins	SFBA0-7
56	18.3643	54.6602	227/18/2048	2018-08-21	Pentachloraniline	µg/dm3	0.1	p.0,1	-	1	Eurofins	SFBA0-7
56	18.3643	54.6602	227/18/2048	2018-08-21	Pentachlorobenzen	µg/dm3	0.1	p.0,1	-	1	Eurofins	SFBA0-7
56	18.3643	54.6602	227/18/2048	2018-08-21	Pentachlorothioanisole	µg/dm3	0.1	p.0,1	-	1	Eurofins	SFBA0-7
56	18.3643	54.6602	227/18/2048	2018-08-21	Permetryna	µg/dm3	0.1	p.0,1	-	1	Eurofins	SFBA0-7
56	18.3643	54.6602	227/18/2048	2018-08-21	Pertan	µg/dm3	0.1	p.0,1	-	1	Eurofins	SFBA0-7
56	18.3643	54.6602	227/18/2048	2018-08-21	Phenkapton	µg/dm3	0.1	p.0,1	-	1	Eurofins	SFBA0-7
56	18.3643	54.6602	227/18/2048	2018-08-21	Phenothrin	µg/dm3	0.1	p.0,1	-	1	Eurofins	SFBA0-7
56	18.3643	54.6602	227/18/2048	2018-08-21	Fentoat	µg/dm3	0.1	p.0,1	-	1	Eurofins	SFBA0-7
56	18.3643	54.6602	227/18/2048	2018-08-21	Fosalon	µg/dm3	0.1	p.0,1	-	1	Eurofins	SFBA0-7
56	18.3643	54.6602	227/18/2048	2018-08-21	Phosfolane	µg/dm3	0.1	p.0,1	-	1	Eurofins	SFBA0-7
56	18.3643	54.6602	227/18/2048	2018-08-21	Fosmet	µg/dm3	0.1	p.0,1	-	1	Eurofins	SFBA0-7
56	18.3643	54.6602	227/18/2048	2018-08-21	Picolinafen	µg/dm3	0.1	p.0,1	-	1	Eurofins	SFBA0-7
56	18.3643	54.6602	227/18/2048	2018-08-21	Pikoksystrobina	µg/dm3	0.1	p.0,1	-	1	Eurofins	SFBA0-7
56	18.3643	54.6602	227/18/2048	2018-08-21	Piperophos	µg/dm3	0.1	p.0,1	-	1	Eurofins	SFBA0-7
56	18.3643	54.6602	227/18/2048	2018-08-21	Pirymifos metylowy	µg/dm3	0.1	p.0,1	-	1	Eurofins	SFBA0-7
56	18.3643	54.6602	227/18/2048	2018-08-21	Pirymifos etylu	µg/dm3	0.1	p.0,1	-	1	Eurofins	SFBA0-7
56	18.3643	54.6602	227/18/2048	2018-08-21	Plifenate	µg/dm3	0.1	p.0,1	-	1	Eurofins	SFBA0-7
56	18.3643	54.6602	227/18/2048	2018-08-21	Praletryna	µg/dm3	0.1	p.0,1	-	1	Eurofins	SFBA0-7
56	18.3643	54.6602	227/18/2048	2018-08-21	Procymidon	µg/dm3	0.1	p.0,1	-	1	Eurofins	SFBA0-7
56	18.3643	54.6602	227/18/2048	2018-08-21	Profenfos	µg/dm3	0.1	p.0,1	-	1	Eurofins	SFBA0-7
56	18.3643	54.6602	227/18/2048	2018-08-21	Profluralina	µg/dm3	0.1	p.0,1	-	1	Eurofins	SFBA0-7
56	18.3643	54.6602	227/18/2048	2018-08-21	Propachlor	µg/dm3	0.1	p.0,1	-	1	Eurofins	SFBA0-7
56	18.3643	54.6602	227/18/2048	2018-08-21	Propanil	µg/dm3	0.1	p.0,1	-	1	Eurofins	SFBA0-7
56	18.3643	54.6602	227/18/2048	2018-08-21	Propazyna	µg/dm3	0.1	p.0,1	-	1	Eurofins	SFBA0-7
56	18.3643	54.6602	227/18/2048	2018-08-21	Propetamfos	µg/dm3	0.1	p.0,1	-	1	Eurofins	SFBA0-7
56	18.3643	54.6602	227/18/2048	2018-08-21	Propikonazol	µg/dm3	0.1	p.0,1	-	1	Eurofins	SFBA0-7
56	18.3643	54.6602	227/18/2048	2018-08-21	Propyzamid	µg/dm3	0.1	p.0,1	-	1	Eurofins	SFBA0-7
56	18.3643	54.6602	227/18/2048	2018-08-21	Protiofos	µg/dm3	0.1	p.0,1	-	1	Eurofins	SFBA0-7
56	18.3643	54.6602	227/18/2048	2018-08-21	Prothoat	µg/dm3	0.1	p.0,1	-	1	Eurofins	SFBA0-7
56	18.3643	54.6602	227/18/2048	2018-08-21	Pyraclofos	µg/dm3	0.1	p.0,1	-	1	Eurofins	SFBA0-7
56	18.3643	54.6602	227/18/2048	2018-08-21	Pyraflufen-ethyl	µg/dm3	0.1	p.0,1	-	1	Eurofins	SFBA0-7
56	18.3643	54.6602	227/18/2048	2018-08-21	Pirazofos	µg/dm3	0.1	p.0,1	-	1	Eurofins	SFBA0-7
56	18.3643	54.6602	227/18/2048	2018-08-21	Pyretryny	µg/dm3	0.1	p.0,1	-	1	Eurofins	SFBA0-7
56	18.3643	54.6602	227/18/2048	2018-08-21	Pirydaben	µg/dm3	0.1	p.0,1	-	1	Eurofins	SFBA0-7
56	18.3643	54.6602	227/18/2048	2018-08-21	Pyridaphenthion	µg/dm3	0.1	p.0,1	-	1	Eurofins	SFBA0-7
56	18.3643	54.6602	227/18/2048	2018-08-21	Pyrifenox	µg/dm3	0.1	p.0,1	-	1	Eurofins	SFBA0-7
56	18.3643	54.6602	227/18/2048	2018-08-21	Pirimithate	µg/dm3	0.1	p.0,1	-	1	Eurofins	SFBA0-7
56	18.3643	54.6602	227/18/2048	2018-08-21	Chinalofos	µg/dm3	0.1	p.0,1	-	1	Eurofins	SFBA0-7
56	18.3643	54.6602	227/18/2048	2018-08-21	Chinoksyfen	µg/dm3	0.1	p.0,1	-	1	Eurofins	SFBA0-7
56	18.3643	54.6602	227/18/2048	2018-08-21	Kwintocen	µg/dm3	0.1	p.0,1	-	1	Eurofins	SFBA0-7
56	18.3643	54.6602	227/18/2048	2018-08-21	Quintozene (suma)	µg/dm3	0.1	p.0,1	-	1	Eurofins	SFBA0-7
56	18.3643	54.6602	227/18/2048	2018-08-21	Chizalofop etylowy	µg/dm3	0.1	p.0,1	-	1	Eurofins	SFBA0-7
56	18.3643	54.6602	227/18/2048	2018-08-21	Resmetryna	µg/dm3	0.1	p.0,1	-	1	Eurofins	SFBA0-7
56	18.3643	54.6602	227/18/2048	2018-08-21	S421 Octachlordipropyleter)	µg/dm3	0.1	p.0,1	-	1	Eurofins	SFBA0-7
56	18.3643	54.6602	227/18/2048	2018-08-21	Spiromesifen	µg/dm3	0.1	p.0,1	-	1	Eurofins	SFBA0-7
56	18.3643	54.6602	227/18/2048	2018-08-21	Sulfotep	µg/dm3	0.1	p.0,1	-	1	Eurofins	SFBA0-7
56	18.3643	54.6602	227/18/2048	2018-08-21	Sulprofos	µg/dm3	0.1	p.0,1	-	1	Eurofins	SFBA0-7
56	18.3643	54.6602	227/18/2048	2018-08-21	Swep	µg/dm3	0.1	p.0,1	-	1	Eurofins	SFBA0-7
56	18.3643	54.6602	227/18/2048	2018-08-21	tau-Fluvalinate	µg/dm3	0.1	p.0,1	-	1	Eurofins	SFBA0-7
56	18.3643	54.6602	227/18/2048	2018-08-21	Tebupirimfos	µg/dm3	0.1	p.0,1	-	1	Eurofins	SFBA0-7
56	18.3643	54.6602	227/18/2048	2018-08-21	Technazen	µg/dm3	0.1	p.0,1	-	1	Eurofins	SFBA0-7
56	18.3643	54.6602	227/18/2048	2018-08-21	Teflutryna	µg/dm3	0.1	p.0,1	-	1	Eurofins	SFBA0-7
56	18.3643	54.6602	227/18/2048	2018-08-21	Temephos	µg/dm3	0.1	p.0,1	-	1	Eurofins	SFBA0-7
56	18.3643	54.6602	227/18/2048	2018-08-21	Terbufos	µg/dm3	0.1	p.0,1	-	1	Eurofins	SFBA0-7
56	18.3643	54.6602	227/18/2048	2018-08-21	Tetrachlorwinfos	µg/dm3	0.1	p.0,1	-	1	Eurofins	SFBA0-7
56	18.3643	54.6602	227/18/2048	2018-08-21	Tetrakonazol	µg/dm3	0.1	p.0,1	-	1	Eurofins	SFBA0-7
56	18.3643	54.6602	227/18/2048	2018-08-21	Tetradifon	µg/dm3	0.1	p.0,1	-	1	Eurofins	SFBA0-7
56	18.3643	54.6602	227/18/2048	2018-08-21	Tetrametryna	µg/dm3	0.1	p.0,1	-	1	Eurofins	SFBA0-7
56	18.3643	54.6602	227/18/2048	2018-08-21	Tetrasul	µg/dm3	0.1	p.0,1	-	1	Eurofins	SFBA0-7
56	18.3643	54.6602	227/18/2048	2018-08-21	Tolklofos metylu	µg/dm3	0.1	p.0,1	-	1	Eurofins	SFBA0-7
56	18.3643	54.6602	227/18/2048	2018-08-21	Tolilofluanid	µg/dm3	0.1	p.0,1	-	1	Eurofins	SFBA0-7
56	18.3643	54.6602	227/18/2048	2018-08-21	Toxaphene Parlar 26	µg/dm3	0.05	p.0,05	-	1	Eurofins	SFBA0-7
56	18.3643	54.6602	227/18/2048	2018-08-21	Toxaphene Parlar 50	µg/dm3	0.05	p.0,05	-	1	Eurofins	SFBA0-7
56	18.3643	54.6602	227/18/2048	2018-08-21	Toxaphene Parlar 62	µg/dm3	0.05	p.0,05	-	1	Eurofins	SFBA0-7
56	18.3643	54.6602	227/18/2048	2018-08-21	Transfluthrin	µg/dm3	0.1	p.0,1	-	1	Eurofins	SFBA0-7
56	18.3643	54.6602	227/18/2048	2018-08-21	Triadimefon	µg/dm3	0.1	p.0,1	-	1	Eurofins	SFBA0-7
56	18.3643	54.6602	227/18/2048	2018-08-21	Triadimenol	µg/dm3	0.1	p.0,1	-	1	Eurofins	SFBA0-7
56	18.3643	54.6602	227/18/2048	2018-08-21	Triadimenol/Triadimefon(suma)	µg/dm3	0.1	p.0,1	-	1	Eurofins	SFBA0-7
56	18.3643	54.6602	227/18/2048	2018-08-21	Trialat	µg/dm3	0.1	p.0,1	-	1	Eurofins	SFBA0-7
56	18.3643	54.6602	227/18/2048	2018-08-21	Triamiphos	µg/dm3	0.1	p.0,1	-	1	Eurofins	SFBA0-7
56	18.3643	54.6602	227/18/2048	2018-08-21	Triazofos	µg/dm3	0.1	p.0,1	-	1	Eurofins	SFBA0-7
56	18.3643	54.6602	227/18/2048	2018-08-21	Tribufos	µg/dm3	0.1	p.0,1	-	1	Eurofins	SFBA0-7
56	18.3643	54.6602	227/18/2048	2018-08-21	Trichloronat	µg/dm3	0.1	p.0,1	-	1	Eurofins	SFBA0-7
56	18.3643	54.6602	227/18/2048	2018-08-21	Tridiphane	µg/dm3	0.1	p.0,1	-	1	Eurofins	SFBA0-7
56	18.3643	54.6602	227/18/2048	2018-08-21	Trifloksystrobina	µg/dm3	0.1	p.0,1	-	1	Eurofins	SFBA0-7
56	18.3643	54.6602	227/18/2048	2018-08-21	Trifluralina	µg/dm3	0.1	p.0,1	-	1	Eurofins	SFBA0-7
56	18.3643	54.6602	227/18/2048	2018-08-21	Vamidothion	µg/dm3	0.1	p.0,1	-	1	Eurofins	SFBA0-7
56	18.3643	54.6602	227/18/2048	2018-08-21	Winklozolina	µg/dm3	0.1	p.0,1	-	1	Eurofins	SFBA0-7
59	18.3571	54.7128	227/18/2049	2018-08-21	α - HCH	µg/dm3	0.002	p.0,002	-	1	M. Wojtkiewicz	PN-EN 16693:2015-12
59	18.3571	54.7128	227/18/2049	2018-08-21	β - HCH	µg/dm3	0.002	p.0,002	-	1	M. Wojtkiewicz	PN-EN 16693:2015-12
59	18.3571	54.7128	227/18/2049	2018-08-21	γ - HCH	µg/dm3	0.002	p.0,002	-	1	M. Wojtkiewicz	PN-EN 16693:2015-12
59	18.3571	54.7128	227/18/2049	2018-08-21	δ - HCH	µg/dm3	0.002	p.0,002	-	1	M. Wojtkiewicz	PN-EN 16693:2015-12
59	18.3571	54.7128	227/18/2049	2018-08-21	Aldryna	µg/dm3	0.005	p.0,005	-	1	M. Wojtkiewicz	PN-EN 16693:2015-12
59	18.3571	54.7128	227/18/2049	2018-08-21	Izodryna	µg/dm3	0.005	p.0,005	-	1	M. Wojtkiewicz	PN-EN 16693:2015-12
59	18.3571	54.7128	227/18/2049	2018-08-21	Dieldryna	µg/dm3	0.005	p.0,005	-	1	M. Wojtkiewicz	PN-EN 16693:2015-12
59	18.3571	54.7128	227/18/2049	2018-08-21	Endryna	µg/dm3	0.005	p.0,005	-	1	M. Wojtkiewicz	PN-EN 16693:2015-12
59	18.3571	54.7128	227/18/2049	2018-08-21	DDE	µg/dm3	0.01	p.0,01	-	1	M. Wojtkiewicz	PN-EN 16693:2015-12
59	18.3571	54.7128	227/18/2049	2018-08-21	DDD	µg/dm3	0.01	p.0,01	-	1	M. Wojtkiewicz	PN-EN 16693:2015-12
59	18.3571	54.7128	227/18/2049	2018-08-21	DDT	µg/dm3	0.01	p.0,01	-	1	M. Wojtkiewicz	PN-EN 16693:2015-12
68	18.4334	54.7138	227/18/2050	2018-08-21	α - HCH	µg/dm3	0.002	p.0,002	-	1	M. Wojtkiewicz	PN-EN 16693:2015-12
68	18.4334	54.7138	227/18/2050	2018-08-21	β - HCH	µg/dm3	0.002	p.0,002	-	1	M. Wojtkiewicz	PN-EN 16693:2015-12
68	18.4334	54.7138	227/18/2050	2018-08-21	γ - HCH	µg/dm3	0.002	p.0,002	-	1	M. Wojtkiewicz	PN-EN 16693:2015-12
68	18.4334	54.7138	227/18/2050	2018-08-21	δ - HCH	µg/dm3	0.002	p.0,002	-	1	M. Wojtkiewicz	PN-EN 16693:2015-12
68	18.4334	54.7138	227/18/2050	2018-08-21	Aldryna	µg/dm3	0.005	p.0,005	-	1	M. Wojtkiewicz	PN-EN 16693:2015-12
68	18.4334	54.7138	227/18/2050	2018-08-21	Izodryna	µg/dm3	0.005	p.0,005	-	1	M. Wojtkiewicz	PN-EN 16693:2015-12
68	18.4334	54.7138	227/18/2050	2018-08-21	Dieldryna	µg/dm3	0.005	p.0,005	-	1	M. Wojtkiewicz	PN-EN 16693:2015-12
68	18.4334	54.7138	227/18/2050	2018-08-21	Endryna	µg/dm3	0.005	p.0,005	-	1	M. Wojtkiewicz	PN-EN 16693:2015-12
68	18.4334	54.7138	227/18/2050	2018-08-21	DDE	µg/dm3	0.01	p.0,01	-	1	M. Wojtkiewicz	PN-EN 16693:2015-12
68	18.4334	54.7138	227/18/2050	2018-08-21	DDD	µg/dm3	0.01	p.0,01	-	1	M. Wojtkiewicz	PN-EN 16693:2015-12
68	18.4334	54.7138	227/18/2050	2018-08-21	DDT	µg/dm3	0.01	p.0,01	-	1	M. Wojtkiewicz	PN-EN 16693:2015-12
69	18.466	54.6656	227/18/2051	2018-08-21	α - HCH	µg/dm3	0.002	p.0,002	-	1	M. Wojtkiewicz	PN-EN 16693:2015-12
69	18.466	54.6656	227/18/2051	2018-08-21	β - HCH	µg/dm3	0.002	p.0,002	-	1	M. Wojtkiewicz	PN-EN 16693:2015-12
69	18.466	54.6656	227/18/2051	2018-08-21	γ - HCH	µg/dm3	0.002	p.0,002	-	1	M. Wojtkiewicz	PN-EN 16693:2015-12
69	18.466	54.6656	227/18/2051	2018-08-21	δ - HCH	µg/dm3	0.002	p.0,002	-	1	M. Wojtkiewicz	PN-EN 16693:2015-12
69	18.466	54.6656	227/18/2051	2018-08-21	Aldryna	µg/dm3	0.005	p.0,005	-	1	M. Wojtkiewicz	PN-EN 16693:2015-12
69	18.466	54.6656	227/18/2051	2018-08-21	Izodryna	µg/dm3	0.005	p.0,005	-	1	M. Wojtkiewicz	PN-EN 16693:2015-12
69	18.466	54.6656	227/18/2051	2018-08-21	Dieldryna	µg/dm3	0.005	p.0,005	-	1	M. Wojtkiewicz	PN-EN 16693:2015-12
69	18.466	54.6656	227/18/2051	2018-08-21	Endryna	µg/dm3	0.005	p.0,005	-	1	M. Wojtkiewicz	PN-EN 16693:2015-12
69	18.466	54.6656	227/18/2051	2018-08-21	DDE	µg/dm3	0.01	p.0,01	-	1	M. Wojtkiewicz	PN-EN 16693:2015-12
69	18.466	54.6656	227/18/2051	2018-08-21	DDD	µg/dm3	0.01	p.0,01	-	1	M. Wojtkiewicz	PN-EN 16693:2015-12
69	18.466	54.6656	227/18/2051	2018-08-21	DDT	µg/dm3	0.01	p.0,01	-	1	M. Wojtkiewicz	PN-EN 16693:2015-12
69	18.466	54.6656	227/18/2051	2018-08-21	2,4,5-T-Methylester	µg/dm3	0.1	p.0,1	-	1	Eurofins	SFBA0-7
69	18.466	54.6656	227/18/2051	2018-08-21	2,4-D-Methylester	µg/dm3	0.1	p.0,1	-	1	Eurofins	SFBA0-7
69	18.466	54.6656	227/18/2051	2018-08-21	Acetochlor	µg/dm3	0.1	p.0,1	-	1	Eurofins	SFBA0-7
69	18.466	54.6656	227/18/2051	2018-08-21	Aclonifen	µg/dm3	0.1	p.0,1	-	1	Eurofins	SFBA0-7
69	18.466	54.6656	227/18/2051	2018-08-21	Akrynatryna	µg/dm3	0.1	p.0,1	-	1	Eurofins	SFBA0-7
69	18.466	54.6656	227/18/2051	2018-08-21	Alachlor	µg/dm3	0.1	p.0,1	-	1	Eurofins	SFBA0-7
69	18.466	54.6656	227/18/2051	2018-08-21	Aldryna	µg/dm3	0.03	p.0,03	-	1	Eurofins	SFBA0-7
69	18.466	54.6656	227/18/2051	2018-08-21	Aldryna+Dieldryna	µg/dm3	0.1	p.0,1	-	1	Eurofins	SFBA0-7
69	18.466	54.6656	227/18/2051	2018-08-21	Alletryna	µg/dm3	0.1	p.0,1	-	1	Eurofins	SFBA0-7
69	18.466	54.6656	227/18/2051	2018-08-21	Amidithion	µg/dm3	0.1	p.0,1	-	1	Eurofins	SFBA0-7
69	18.466	54.6656	227/18/2051	2018-08-21	Antrachinon	µg/dm3	0.1	p.0,1	-	1	Eurofins	SFBA0-7
69	18.466	54.6656	227/18/2051	2018-08-21	Atrazyna	µg/dm3	0.1	p.0,1	-	1	Eurofins	SFBA0-7
69	18.466	54.6656	227/18/2051	2018-08-21	Azakonazol	µg/dm3	0.1	p.0,1	-	1	Eurofins	SFBA0-7
69	18.466	54.6656	227/18/2051	2018-08-21	Azynofos etylowy	µg/dm3	0.1	p.0,1	-	1	Eurofins	SFBA0-7
69	18.466	54.6656	227/18/2051	2018-08-21	Azynofos metylowy	µg/dm3	0.1	p.0,1	-	1	Eurofins	SFBA0-7
69	18.466	54.6656	227/18/2051	2018-08-21	Azoksystrobina	µg/dm3	0.1	p.0,1	-	1	Eurofins	SFBA0-7
69	18.466	54.6656	227/18/2051	2018-08-21	Benfluralin	µg/dm3	0.1	p.0,1	-	1	Eurofins	SFBA0-7
69	18.466	54.6656	227/18/2051	2018-08-21	Benoxacor	µg/dm3	0.1	p.0,1	-	1	Eurofins	SFBA0-7
69	18.466	54.6656	227/18/2051	2018-08-21	Benzoylprop-ethyl	µg/dm3	0.1	p.0,1	-	1	Eurofins	SFBA0-7
69	18.466	54.6656	227/18/2051	2018-08-21	Biofenox	µg/dm3	0.1	p.0,1	-	1	Eurofins	SFBA0-7
69	18.466	54.6656	227/18/2051	2018-08-21	Binapacryl	µg/dm3	0.1	p.0,1	-	1	Eurofins	SFBA0-7
69	18.466	54.6656	227/18/2051	2018-08-21	Bifentryna	µg/dm3	0.1	p.0,1	-	1	Eurofins	SFBA0-7
69	18.466	54.6656	227/18/2051	2018-08-21	Bitertanol	µg/dm3	0.1	p.0,1	-	1	Eurofins	SFBA0-7
69	18.466	54.6656	227/18/2051	2018-08-21	Boskalid	µg/dm3	0.1	p.0,1	-	1	Eurofins	SFBA0-7
69	18.466	54.6656	227/18/2051	2018-08-21	Bromofenvinphos	µg/dm3	0.1	p.0,1	-	1	Eurofins	SFBA0-7
69	18.466	54.6656	227/18/2051	2018-08-21	Bromocyclen	µg/dm3	0.1	p.0,1	-	1	Eurofins	SFBA0-7
69	18.466	54.6656	227/18/2051	2018-08-21	Bromofos metylowy	µg/dm3	0.1	p.0,1	-	1	Eurofins	SFBA0-7
69	18.466	54.6656	227/18/2051	2018-08-21	Bromofos etylowy	µg/dm3	0.1	p.0,1	-	1	Eurofins	SFBA0-7
69	18.466	54.6656	227/18/2051	2018-08-21	Bromopropylat	µg/dm3	0.1	p.0,1	-	1	Eurofins	SFBA0-7
69	18.466	54.6656	227/18/2051	2018-08-21	Buprofezyna	µg/dm3	0.1	p.0,1	-	1	Eurofins	SFBA0-7
69	18.466	54.6656	227/18/2051	2018-08-21	Butachlor	µg/dm3	0.1	p.0,1	-	1	Eurofins	SFBA0-7
69	18.466	54.6656	227/18/2051	2018-08-21	Butamifos	µg/dm3	0.1	p.0,1	-	1	Eurofins	SFBA0-7
69	18.466	54.6656	227/18/2051	2018-08-21	Butralin	µg/dm3	0.1	p.0,1	-	1	Eurofins	SFBA0-7
69	18.466	54.6656	227/18/2051	2018-08-21	Kadusafos	µg/dm3	0.1	p.0,1	-	1	Eurofins	SFBA0-7
69	18.466	54.6656	227/18/2051	2018-08-21	Kaptafol	µg/dm3	0.1	p.0,1	-	1	Eurofins	SFBA0-7
69	18.466	54.6656	227/18/2051	2018-08-21	Kaptan	µg/dm3	0.1	p.0,1	-	1	Eurofins	SFBA0-7
69	18.466	54.6656	227/18/2051	2018-08-21	Karbofenotion	µg/dm3	0.1	p.0,1	-	1	Eurofins	SFBA0-7
69	18.466	54.6656	227/18/2051	2018-08-21	Carbophenothion-methyl	µg/dm3	0.1	p.0,1	-	1	Eurofins	SFBA0-7
69	18.466	54.6656	227/18/2051	2018-08-21	Carfentrazone-ethyl	µg/dm3	0.1	p.0,1	-	1	Eurofins	SFBA0-7
69	18.466	54.6656	227/18/2051	2018-08-21	Chinometionat	µg/dm3	0.1	p.0,1	-	1	Eurofins	SFBA0-7
69	18.466	54.6656	227/18/2051	2018-08-21	Chlorbenzyd	µg/dm3	0.1	p.0,1	-	1	Eurofins	SFBA0-7
69	18.466	54.6656	227/18/2051	2018-08-21	Chlordane (total)	µg/dm3	0.1	p.0,1	-	1	Eurofins	SFBA0-7
69	18.466	54.6656	227/18/2051	2018-08-21	Chlordan,cis-	µg/dm3	0.1	p.0,1	-	1	Eurofins	SFBA0-7
69	18.466	54.6656	227/18/2051	2018-08-21	Chlordan,oxy-	µg/dm3	0.1	p.0,1	-	1	Eurofins	SFBA0-7
69	18.466	54.6656	227/18/2051	2018-08-21	Chlordan,gamma/trans-	µg/dm3	0.1	p.0,1	-	1	Eurofins	SFBA0-7
69	18.466	54.6656	227/18/2051	2018-08-21	Chlordecon	µg/dm3	0.1	p.0,1	-	1	Eurofins	SFBA0-7
69	18.466	54.6656	227/18/2051	2018-08-21	Chlorethoksyfos	µg/dm3	0.1	p.0,1	-	1	Eurofins	SFBA0-7
69	18.466	54.6656	227/18/2051	2018-08-21	Chlorfenapyr	µg/dm3	0.1	p.0,1	-	1	Eurofins	SFBA0-7
69	18.466	54.6656	227/18/2051	2018-08-21	Chlorfenprop-methyl	µg/dm3	0.1	p.0,1	-	1	Eurofins	SFBA0-7
69	18.466	54.6656	227/18/2051	2018-08-21	Chlorfenson	µg/dm3	0.1	p.0,1	-	1	Eurofins	SFBA0-7
69	18.466	54.6656	227/18/2051	2018-08-21	Chlorfenwinfos	µg/dm3	0.1	p.0,1	-	1	Eurofins	SFBA0-7
69	18.466	54.6656	227/18/2051	2018-08-21	Chloridazon	µg/dm3	0.1	p.0,1	-	1	Eurofins	SFBA0-7
69	18.466	54.6656	227/18/2051	2018-08-21	Chlormephos	µg/dm3	0.1	p.0,1	-	1	Eurofins	SFBA0-7
69	18.466	54.6656	227/18/2051	2018-08-21	Chlorobenzylat	µg/dm3	0.1	p.0,1	-	1	Eurofins	SFBA0-7
69	18.466	54.6656	227/18/2051	2018-08-21	Chloroneb	µg/dm3	0.1	p.0,1	-	1	Eurofins	SFBA0-7
69	18.466	54.6656	227/18/2051	2018-08-21	Chloropropylat	µg/dm3	0.1	p.0,1	-	1	Eurofins	SFBA0-7
69	18.466	54.6656	227/18/2051	2018-08-21	Chlorotalonil	µg/dm3	0.1	p.0,1	-	1	Eurofins	SFBA0-7
69	18.466	54.6656	227/18/2051	2018-08-21	Chlorpiryfos etylowy	µg/dm3	0.1	p.0,1	-	1	Eurofins	SFBA0-7
69	18.466	54.6656	227/18/2051	2018-08-21	Chlorpiryfos metylowy	µg/dm3	0.1	p.0,1	-	1	Eurofins	SFBA0-7
69	18.466	54.6656	227/18/2051	2018-08-21	Chlorthal-dimethyl	µg/dm3	0.1	p.0,1	-	1	Eurofins	SFBA0-7
69	18.466	54.6656	227/18/2051	2018-08-21	Chlorotion	µg/dm3	0.1	p.0,1	-	1	Eurofins	SFBA0-7
69	18.466	54.6656	227/18/2051	2018-08-21	Chlortiofos	µg/dm3	0.1	p.0,1	-	1	Eurofins	SFBA0-7
69	18.466	54.6656	227/18/2051	2018-08-21	Chlozolinate	µg/dm3	0.1	p.0,1	-	1	Eurofins	SFBA0-7
69	18.466	54.6656	227/18/2051	2018-08-21	Cinidon-ethyl	µg/dm3	0.1	p.0,1	-	1	Eurofins	SFBA0-7
69	18.466	54.6656	227/18/2051	2018-08-21	Clodinafop-propargyl	µg/dm3	0.1	p.0,1	-	1	Eurofins	SFBA0-7
69	18.466	54.6656	227/18/2051	2018-08-21	Kumafos	µg/dm3	0.1	p.0,1	-	1	Eurofins	SFBA0-7
69	18.466	54.6656	227/18/2051	2018-08-21	Crotoxyphos	µg/dm3	0.1	p.0,1	-	1	Eurofins	SFBA0-7
69	18.466	54.6656	227/18/2051	2018-08-21	Cyjanofenfos	µg/dm3	0.1	p.0,1	-	1	Eurofins	SFBA0-7
69	18.466	54.6656	227/18/2051	2018-08-21	Cyanophos	µg/dm3	0.1	p.0,1	-	1	Eurofins	SFBA0-7
69	18.466	54.6656	227/18/2051	2018-08-21	Cyflutryna	µg/dm3	0.1	p.0,1	-	1	Eurofins	SFBA0-7
69	18.466	54.6656	227/18/2051	2018-08-21	lambda-Cyhalotryna	µg/dm3	0.1	p.0,1	-	1	Eurofins	SFBA0-7
69	18.466	54.6656	227/18/2051	2018-08-21	Cypermetryna	µg/dm3	0.1	p.0,1	-	1	Eurofins	SFBA0-7
69	18.466	54.6656	227/18/2051	2018-08-21	Cyphenothrin	µg/dm3	0.1	p.0,1	-	1	Eurofins	SFBA0-7
69	18.466	54.6656	227/18/2051	2018-08-21	Cyprokonazol	µg/dm3	0.1	p.0,1	-	1	Eurofins	SFBA0-7
69	18.466	54.6656	227/18/2051	2018-08-21	DDD-o,p	µg/dm3	0.1	p.0,1	-	1	Eurofins	SFBA0-7
69	18.466	54.6656	227/18/2051	2018-08-21	DDE-o,p	µg/dm3	0.1	p.0,1	-	1	Eurofins	SFBA0-7
69	18.466	54.6656	227/18/2051	2018-08-21	DDT(p,p'-DDT+o,p'-DDT+p.p'-DDE+p,p'-TDE)	µg/dm3	0.1	p.0,1	-	1	Eurofins	SFBA0-7
69	18.466	54.6656	227/18/2051	2018-08-21	Deltametryna	µg/dm3	0.1	p.0,1	-	1	Eurofins	SFBA0-7
69	18.466	54.6656	227/18/2051	2018-08-21	Dialifos	µg/dm3	0.1	p.0,1	-	1	Eurofins	SFBA0-7
69	18.466	54.6656	227/18/2051	2018-08-21	Di-allate	µg/dm3	0.1	p.0,1	-	1	Eurofins	SFBA0-7
69	18.466	54.6656	227/18/2051	2018-08-21	Diazynon	µg/dm3	0.05	p.0,05	-	1	Eurofins	SFBA0-7
69	18.466	54.6656	227/18/2051	2018-08-21	4,4-Dibromobenzophenone	µg/dm3	0.1	p.0,1	-	1	Eurofins	SFBA0-7
69	18.466	54.6656	227/18/2051	2018-08-21	Dicapthon	µg/dm3	0.1	p.0,1	-	1	Eurofins	SFBA0-7
69	18.466	54.6656	227/18/2051	2018-08-21	Dichlobenil	µg/dm3	0.1	p.0,1	-	1	Eurofins	SFBA0-7
69	18.466	54.6656	227/18/2051	2018-08-21	Dichlofention	µg/dm3	0.1	p.0,1	-	1	Eurofins	SFBA0-7
69	18.466	54.6656	227/18/2051	2018-08-21	Dichlofluanid	µg/dm3	0.1	p.0,1	-	1	Eurofins	SFBA0-7
69	18.466	54.6656	227/18/2051	2018-08-21	Dichloran	µg/dm3	0.1	p.0,1	-	1	Eurofins	SFBA0-7
69	18.466	54.6656	227/18/2051	2018-08-21	Dichlorfos	µg/dm3	0.1	p.0,1	-	1	Eurofins	SFBA0-7
69	18.466	54.6656	227/18/2051	2018-08-21	Diclofop-methyl	µg/dm3	0.1	p.0,1	-	1	Eurofins	SFBA0-7
69	18.466	54.6656	227/18/2051	2018-08-21	Dikofol (suma)	µg/dm3	0.1	p.0,1	-	1	Eurofins	SFBA0-7
69	18.466	54.6656	227/18/2051	2018-08-21	Dicofol,o,p-	µg/dm3	0.1	p.0,1	-	1	Eurofins	SFBA0-7
69	18.466	54.6656	227/18/2051	2018-08-21	Dicofol,p,p--	µg/dm3	0.1	p.0,1	-	1	Eurofins	SFBA0-7
69	18.466	54.6656	227/18/2051	2018-08-21	Dicrotophos	µg/dm3	0.1	p.0,1	-	1	Eurofins	SFBA0-7
69	18.466	54.6656	227/18/2051	2018-08-21	Dieldryna	µg/dm3	0.03	p.0,03	-	1	Eurofins	SFBA0-7
69	18.466	54.6656	227/18/2051	2018-08-21	Dienochlor	µg/dm3	0.1	p.0,1	-	1	Eurofins	SFBA0-7
69	18.466	54.6656	227/18/2051	2018-08-21	Difenokonazol	µg/dm3	0.1	p.0,1	-	1	Eurofins	SFBA0-7
69	18.466	54.6656	227/18/2051	2018-08-21	Diflufenican	µg/dm3	0.1	p.0,1	-	1	Eurofins	SFBA0-7
69	18.466	54.6656	227/18/2051	2018-08-21	Dimefox	µg/dm3	0.1	p.0,1	-	1	Eurofins	SFBA0-7
69	18.466	54.6656	227/18/2051	2018-08-21	Dimetrachlor	µg/dm3	0.1	p.0,1	-	1	Eurofins	SFBA0-7
69	18.466	54.6656	227/18/2051	2018-08-21	Dimethipine	µg/dm3	0.1	p.0,1	-	1	Eurofins	SFBA0-7
69	18.466	54.6656	227/18/2051	2018-08-21	Dimetoat	µg/dm3	0.1	p.0,1	-	1	Eurofins	SFBA0-7
69	18.466	54.6656	227/18/2051	2018-08-21	Dimetomorf	µg/dm3	0.1	p.0,1	-	1	Eurofins	SFBA0-7
69	18.466	54.6656	227/18/2051	2018-08-21	Dinikonazol	µg/dm3	0.1	p.0,1	-	1	Eurofins	SFBA0-7
69	18.466	54.6656	227/18/2051	2018-08-21	Dinitramine	µg/dm3	0.1	p.0,1	-	1	Eurofins	SFBA0-7
69	18.466	54.6656	227/18/2051	2018-08-21	Dinobuton	µg/dm3	0.1	p.0,1	-	1	Eurofins	SFBA0-7
69	18.466	54.6656	227/18/2051	2018-08-21	Disulfoton	µg/dm3	0.1	p.0,1	-	1	Eurofins	SFBA0-7
69	18.466	54.6656	227/18/2051	2018-08-21	Disulfoton-sulfon	µg/dm3	0.1	p.0,1	-	1	Eurofins	SFBA0-7
69	18.466	54.6656	227/18/2051	2018-08-21	Ditalimfos	µg/dm3	0.1	p.0,1	-	1	Eurofins	SFBA0-7
69	18.466	54.6656	227/18/2051	2018-08-21	Edifenphos	µg/dm3	0.1	p.0,1	-	1	Eurofins	SFBA0-7
69	18.466	54.6656	227/18/2051	2018-08-21	Endosulfan (suma izomerów)	µg/dm3	0.1	p.0,1	-	1	Eurofins	SFBA0-7
69	18.466	54.6656	227/18/2051	2018-08-21	alfa-Endosulfan	µg/dm3	0.1	p.0,1	-	1	Eurofins	SFBA0-7
69	18.466	54.6656	227/18/2051	2018-08-21	Siarczan endosulfanu	µg/dm3	0.1	p.0,1	-	1	Eurofins	SFBA0-7
69	18.466	54.6656	227/18/2051	2018-08-21	beta-Endosulfan	µg/dm3	0.1	p.0,1	-	1	Eurofins	SFBA0-7
69	18.466	54.6656	227/18/2051	2018-08-21	Endryna	µg/dm3	0.1	p.0,1	-	1	Eurofins	SFBA0-7
69	18.466	54.6656	227/18/2051	2018-08-21	Ketoendrin-delta	µg/dm3	0.1	p.0,1	-	1	Eurofins	SFBA0-7
69	18.466	54.6656	227/18/2051	2018-08-21	EPN	µg/dm3	0.1	p.0,1	-	1	Eurofins	SFBA0-7
69	18.466	54.6656	227/18/2051	2018-08-21	Epoksykonazol	µg/dm3	0.1	p.0,1	-	1	Eurofins	SFBA0-7
69	18.466	54.6656	227/18/2051	2018-08-21	Etaconazole	µg/dm3	0.1	p.0,1	-	1	Eurofins	SFBA0-7
69	18.466	54.6656	227/18/2051	2018-08-21	Ethalfluralin	µg/dm3	0.1	p.0,1	-	1	Eurofins	SFBA0-7
69	18.466	54.6656	227/18/2051	2018-08-21	Etion	µg/dm3	0.1	p.0,1	-	1	Eurofins	SFBA0-7
69	18.466	54.6656	227/18/2051	2018-08-21	Ethiprol	µg/dm3	0.1	p.0,1	-	1	Eurofins	SFBA0-7
69	18.466	54.6656	227/18/2051	2018-08-21	Etofumesat	µg/dm3	0.1	p.0,1	-	1	Eurofins	SFBA0-7
69	18.466	54.6656	227/18/2051	2018-08-21	Etoprofos	µg/dm3	0.1	p.0,1	-	1	Eurofins	SFBA0-7
69	18.466	54.6656	227/18/2051	2018-08-21	Etridiazole	µg/dm3	0.1	p.0,1	-	1	Eurofins	SFBA0-7
69	18.466	54.6656	227/18/2051	2018-08-21	Etrimfos	µg/dm3	0.1	p.0,1	-	1	Eurofins	SFBA0-7
69	18.466	54.6656	227/18/2051	2018-08-21	Famophos	µg/dm3	0.1	p.0,1	-	1	Eurofins	SFBA0-7
69	18.466	54.6656	227/18/2051	2018-08-21	Famoksadon	µg/dm3	0.1	p.0,1	-	1	Eurofins	SFBA0-7
69	18.466	54.6656	227/18/2051	2018-08-21	Fenamidon	µg/dm3	0.1	p.0,1	-	1	Eurofins	SFBA0-7
69	18.466	54.6656	227/18/2051	2018-08-21	Fenamifos (suma izomerów)	µg/dm3	0.1	p.0,1	-	1	Eurofins	SFBA0-7
69	18.466	54.6656	227/18/2051	2018-08-21	Fenarimol	µg/dm3	0.1	p.0,1	-	1	Eurofins	SFBA0-7
69	18.466	54.6656	227/18/2051	2018-08-21	Fenbukonazol	µg/dm3	0.1	p.0,1	-	1	Eurofins	SFBA0-7
69	18.466	54.6656	227/18/2051	2018-08-21	Fenchlorazole	µg/dm3	0.1	p.0,1	-	1	Eurofins	SFBA0-7
69	18.466	54.6656	227/18/2051	2018-08-21	Fenchlorofos	µg/dm3	0.1	p.0,1	-	1	Eurofins	SFBA0-7
69	18.466	54.6656	227/18/2051	2018-08-21	Fenfluthrine	µg/dm3	0.1	p.0,1	-	1	Eurofins	SFBA0-7
69	18.466	54.6656	227/18/2051	2018-08-21	Fenheksamid	µg/dm3	0.1	p.0,1	-	1	Eurofins	SFBA0-7
69	18.466	54.6656	227/18/2051	2018-08-21	Fenitrotion	µg/dm3	0.1	p.0,1	-	1	Eurofins	SFBA0-7
69	18.466	54.6656	227/18/2051	2018-08-21	Fenoxaprop-ethyl	µg/dm3	0.1	p.0,1	-	1	Eurofins	SFBA0-7
69	18.466	54.6656	227/18/2051	2018-08-21	Fenpiclonil	µg/dm3	0.1	p.0,1	-	1	Eurofins	SFBA0-7
69	18.466	54.6656	227/18/2051	2018-08-21	Fenpropatryna	µg/dm3	0.1	p.0,1	-	1	Eurofins	SFBA0-7
69	18.466	54.6656	227/18/2051	2018-08-21	Fenpropimorf	µg/dm3	0.1	p.0,1	-	1	Eurofins	SFBA0-7
69	18.466	54.6656	227/18/2051	2018-08-21	Fenson	µg/dm3	0.1	p.0,1	-	1	Eurofins	SFBA0-7
69	18.466	54.6656	227/18/2051	2018-08-21	Fensulfotion	µg/dm3	0.1	p.0,1	-	1	Eurofins	SFBA0-7
69	18.466	54.6656	227/18/2051	2018-08-21	Fewalerat (suma izomer ów)	µg/dm3	0.1	p.0,1	-	1	Eurofins	SFBA0-7
69	18.466	54.6656	227/18/2051	2018-08-21	Fenwalerat	µg/dm3	0.1	p.0,1	-	1	Eurofins	SFBA0-7
69	18.466	54.6656	227/18/2051	2018-08-21	Fenvalerate(RS-/SR-Izomer)	µg/dm3	0.1	p.0,1	-	1	Eurofins	SFBA0-7
69	18.466	54.6656	227/18/2051	2018-08-21	Fipronil	µg/dm3	0.1	p.0,1	-	1	Eurofins	SFBA0-7
69	18.466	54.6656	227/18/2051	2018-08-21	Fipronil,desulfinyl-	µg/dm3	0.1	p.0,1	-	1	Eurofins	SFBA0-7
69	18.466	54.6656	227/18/2051	2018-08-21	Fipranil+Sulfonmetab.MB46136(suma)	µg/dm3	0.1	p.0,1	-	1	Eurofins	SFBA0-7
69	18.466	54.6656	227/18/2051	2018-08-21	Fipronil sulfid	µg/dm3	0.1	p.0,1	-	1	Eurofins	SFBA0-7
69	18.466	54.6656	227/18/2051	2018-08-21	Fipronil sulfon	µg/dm3	0.1	p.0,1	-	1	Eurofins	SFBA0-7
69	18.466	54.6656	227/18/2051	2018-08-21	Flamprop-isopropyl	µg/dm3	0.1	p.0,1	-	1	Eurofins	SFBA0-7
69	18.466	54.6656	227/18/2051	2018-08-21	Flamprop-methyl	µg/dm3	0.1	p.0,1	-	1	Eurofins	SFBA0-7
69	18.466	54.6656	227/18/2051	2018-08-21	Flonikamid	µg/dm3	0.1	p.0,1	-	1	Eurofins	SFBA0-7
69	18.466	54.6656	227/18/2051	2018-08-21	Fluazifop-butyl	µg/dm3	0.1	p.0,1	-	1	Eurofins	SFBA0-7
69	18.466	54.6656	227/18/2051	2018-08-21	Fluazinam	µg/dm3	0.1	p.0,1	-	1	Eurofins	SFBA0-7
69	18.466	54.6656	227/18/2051	2018-08-21	Fluchloralina	µg/dm3	0.1	p.0,1	-	1	Eurofins	SFBA0-7
69	18.466	54.6656	227/18/2051	2018-08-21	Flucytrynat	µg/dm3	0.1	p.0,1	-	1	Eurofins	SFBA0-7
69	18.466	54.6656	227/18/2051	2018-08-21	Flufenoksuron	µg/dm3	0.1	p.0,1	-	1	Eurofins	SFBA0-7
69	18.466	54.6656	227/18/2051	2018-08-21	Flumethrine	µg/dm3	0.1	p.0,1	-	1	Eurofins	SFBA0-7
69	18.466	54.6656	227/18/2051	2018-08-21	Flumetralin	µg/dm3	0.1	p.0,1	-	1	Eurofins	SFBA0-7
69	18.466	54.6656	227/18/2051	2018-08-21	Flupikolid	µg/dm3	0.1	p.0,1	-	1	Eurofins	SFBA0-7
69	18.466	54.6656	227/18/2051	2018-08-21	Fluorodifen	µg/dm3	0.1	p.0,1	-	1	Eurofins	SFBA0-7
69	18.466	54.6656	227/18/2051	2018-08-21	Fluotrimazole	µg/dm3	0.1	p.0,1	-	1	Eurofins	SFBA0-7
69	18.466	54.6656	227/18/2051	2018-08-21	Fluchinkonazol	µg/dm3	0.1	p.0,1	-	1	Eurofins	SFBA0-7
69	18.466	54.6656	227/18/2051	2018-08-21	Flurenol-butyl	µg/dm3	0.1	p.0,1	-	1	Eurofins	SFBA0-7
69	18.466	54.6656	227/18/2051	2018-08-21	Flurochloridon	µg/dm3	0.1	p.0,1	-	1	Eurofins	SFBA0-7
69	18.466	54.6656	227/18/2051	2018-08-21	Flurtamone	µg/dm3	0.05	p.0,05	-	1	Eurofins	SFBA0-7
69	18.466	54.6656	227/18/2051	2018-08-21	Flusilazol	µg/dm3	0.1	p.0,1	-	1	Eurofins	SFBA0-7
69	18.466	54.6656	227/18/2051	2018-08-21	Folpet	µg/dm3	0.1	p.0,1	-	1	Eurofins	SFBA0-7
69	18.466	54.6656	227/18/2051	2018-08-21	Fonofos	µg/dm3	0.1	p.0,1	-	1	Eurofins	SFBA0-7
69	18.466	54.6656	227/18/2051	2018-08-21	Formotion	µg/dm3	0.1	p.0,1	-	1	Eurofins	SFBA0-7
69	18.466	54.6656	227/18/2051	2018-08-21	Genite	µg/dm3	0.1	p.0,1	-	1	Eurofins	SFBA0-7
69	18.466	54.6656	227/18/2051	2018-08-21	Halfenprox	µg/dm3	0.1	p.0,1	-	1	Eurofins	SFBA0-7
69	18.466	54.6656	227/18/2051	2018-08-21	Haloxyfop-Ethoxyethyl	µg/dm3	0.1	p.0,1	-	1	Eurofins	SFBA0-7
69	18.466	54.6656	227/18/2051	2018-08-21	Haloxyfop-methyl	µg/dm3	0.1	p.0,1	-	1	Eurofins	SFBA0-7
69	18.466	54.6656	227/18/2051	2018-08-21	HCH (sumaizomerów-bez lindan)	µg/dm3	0.1	p.0,1	-	1	Eurofins	SFBA0-7
69	18.466	54.6656	227/18/2051	2018-08-21	Alfa-HCH	µg/dm3	0.05	p.0,05	-	1	Eurofins	SFBA0-7
69	18.466	54.6656	227/18/2051	2018-08-21	Beta-HCH	µg/dm3	0.05	p.0,05	-	1	Eurofins	SFBA0-7
69	18.466	54.6656	227/18/2051	2018-08-21	Delta-HCH	µg/dm3	0.05	p.0,05	-	1	Eurofins	SFBA0-7
69	18.466	54.6656	227/18/2051	2018-08-21	Epsilon-HCH	µg/dm3	0.05	p.0,05	-	1	Eurofins	SFBA0-7
69	18.466	54.6656	227/18/2051	2018-08-21	Lindan(gamma-HCH)	µg/dm3	0.1	p.0,1	-	1	Eurofins	SFBA0-7
69	18.466	54.6656	227/18/2051	2018-08-21	Heptachlor	µg/dm3	0.03	p.0,03	-	1	Eurofins	SFBA0-7
69	18.466	54.6656	227/18/2051	2018-08-21	Heptachlor(suma)	µg/dm3	0.03	p.0,03	-	1	Eurofins	SFBA0-7
69	18.466	54.6656	227/18/2051	2018-08-21	Heptahlor-trans-epoksyd	µg/dm3	0.03	p.0,03	-	1	Eurofins	SFBA0-7
69	18.466	54.6656	227/18/2051	2018-08-21	Heptahlor-cis-epoksyd	µg/dm3	0.03	p.0,03	-	1	Eurofins	SFBA0-7
69	18.466	54.6656	227/18/2051	2018-08-21	Heptenofos	µg/dm3	0.1	p.0,1	-	1	Eurofins	SFBA0-7
69	18.466	54.6656	227/18/2051	2018-08-21	Heksachlorobenzen(HCB)	µg/dm3	0.1	p.0,1	-	1	Eurofins	SFBA0-7
69	18.466	54.6656	227/18/2051	2018-08-21	Heksakonazol	µg/dm3	0.1	p.0,1	-	1	Eurofins	SFBA0-7
69	18.466	54.6656	227/18/2051	2018-08-21	Indanofan	µg/dm3	0.1	p.0,1	-	1	Eurofins	SFBA0-7
69	18.466	54.6656	227/18/2051	2018-08-21	Indoksakarb	µg/dm3	0.1	p.0,1	-	1	Eurofins	SFBA0-7
69	18.466	54.6656	227/18/2051	2018-08-21	Jodofenfos	µg/dm3	0.1	p.0,1	-	1	Eurofins	SFBA0-7
69	18.466	54.6656	227/18/2051	2018-08-21	Ioxynil-Octanoate	µg/dm3	0.1	p.0,1	-	1	Eurofins	SFBA0-7
69	18.466	54.6656	227/18/2051	2018-08-21	Iprobenfos	µg/dm3	0.1	p.0,1	-	1	Eurofins	SFBA0-7
69	18.466	54.6656	227/18/2051	2018-08-21	Iprodion	µg/dm3	0.1	p.0,1	-	1	Eurofins	SFBA0-7
69	18.466	54.6656	227/18/2051	2018-08-21	Isazophos	µg/dm3	0.1	p.0,1	-	1	Eurofins	SFBA0-7
69	18.466	54.6656	227/18/2051	2018-08-21	Isobenzan	µg/dm3	0.1	p.0,1	-	1	Eurofins	SFBA0-7
69	18.466	54.6656	227/18/2051	2018-08-21	Isocarbofos	µg/dm3	0.1	p.0,1	-	1	Eurofins	SFBA0-7
69	18.466	54.6656	227/18/2051	2018-08-21	Izodryna	µg/dm3	0.1	p.0,1	-	1	Eurofins	SFBA0-7
69	18.466	54.6656	227/18/2051	2018-08-21	Izofenfos	µg/dm3	0.1	p.0,1	-	1	Eurofins	SFBA0-7
69	18.466	54.6656	227/18/2051	2018-08-21	Isofenphos-Methyl	µg/dm3	0.1	p.0,1	-	1	Eurofins	SFBA0-7
69	18.466	54.6656	227/18/2051	2018-08-21	Isomethiozin	µg/dm3	0.1	p.0,1	-	1	Eurofins	SFBA0-7
69	18.466	54.6656	227/18/2051	2018-08-21	Isopropalin	µg/dm3	0.1	p.0,1	-	1	Eurofins	SFBA0-7
69	18.466	54.6656	227/18/2051	2018-08-21	Isoxadifen-ethyl	µg/dm3	0.1	p.0,1	-	1	Eurofins	SFBA0-7
69	18.466	54.6656	227/18/2051	2018-08-21	Krezoksym-metylu	µg/dm3	0.1	p.0,1	-	1	Eurofins	SFBA0-7
69	18.466	54.6656	227/18/2051	2018-08-21	Lactofen	µg/dm3	0.1	p.0,1	-	1	Eurofins	SFBA0-7
69	18.466	54.6656	227/18/2051	2018-08-21	Leptophos	µg/dm3	0.1	p.0,1	-	1	Eurofins	SFBA0-7
69	18.466	54.6656	227/18/2051	2018-08-21	Lufenuron	µg/dm3	0.1	p.0,1	-	1	Eurofins	SFBA0-7
69	18.466	54.6656	227/18/2051	2018-08-21	Malaokson	µg/dm3	0.05	p.0,05	-	1	Eurofins	SFBA0-7
69	18.466	54.6656	227/18/2051	2018-08-21	Malation	µg/dm3	0.1	p.0,1	-	1	Eurofins	SFBA0-7
69	18.466	54.6656	227/18/2051	2018-08-21	Mekarbam	µg/dm3	0.1	p.0,1	-	1	Eurofins	SFBA0-7
69	18.466	54.6656	227/18/2051	2018-08-21	Mephosfolan	µg/dm3	0.1	p.0,1	-	1	Eurofins	SFBA0-7
69	18.466	54.6656	227/18/2051	2018-08-21	Merphos	µg/dm3	0.1	p.0,1	-	1	Eurofins	SFBA0-7
69	18.466	54.6656	227/18/2051	2018-08-21	Metazachlor	µg/dm3	0.1	p.0,1	-	1	Eurofins	SFBA0-7
69	18.466	54.6656	227/18/2051	2018-08-21	Metakrifos	µg/dm3	0.1	p.0,1	-	1	Eurofins	SFBA0-7
69	18.466	54.6656	227/18/2051	2018-08-21	Metydation	µg/dm3	0.1	p.0,1	-	1	Eurofins	SFBA0-7
69	18.466	54.6656	227/18/2051	2018-08-21	Metoksychlor	µg/dm3	0.1	p.0,1	-	1	Eurofins	SFBA0-7
69	18.466	54.6656	227/18/2051	2018-08-21	Metolachlor	µg/dm3	0.1	p.0,1	-	1	Eurofins	SFBA0-7
69	18.466	54.6656	227/18/2051	2018-08-21	Metrafenon	µg/dm3	0.1	p.0,1	-	1	Eurofins	SFBA0-7
69	18.466	54.6656	227/18/2051	2018-08-21	Metribuzyn	µg/dm3	0.1	p.0,1	-	1	Eurofins	SFBA0-7
69	18.466	54.6656	227/18/2051	2018-08-21	Mevinfos	µg/dm3	0.1	p.0,1	-	1	Eurofins	SFBA0-7
69	18.466	54.6656	227/18/2051	2018-08-21	Mirex	µg/dm3	0.1	p.0,1	-	1	Eurofins	SFBA0-7
69	18.466	54.6656	227/18/2051	2018-08-21	Molinate	µg/dm3	0.1	p.0,1	-	1	Eurofins	SFBA0-7
69	18.466	54.6656	227/18/2051	2018-08-21	Myklobutanil	µg/dm3	0.1	p.0,1	-	1	Eurofins	SFBA0-7
69	18.466	54.6656	227/18/2051	2018-08-21	Nitralin	µg/dm3	0.1	p.0,1	-	1	Eurofins	SFBA0-7
69	18.466	54.6656	227/18/2051	2018-08-21	Nitrapyrin	µg/dm3	0.1	p.0,1	-	1	Eurofins	SFBA0-7
69	18.466	54.6656	227/18/2051	2018-08-21	Nitrofen	µg/dm3	0.1	p.0,1	-	1	Eurofins	SFBA0-7
69	18.466	54.6656	227/18/2051	2018-08-21	Nitrothal-isopropyl	µg/dm3	0.1	p.0,1	-	1	Eurofins	SFBA0-7
69	18.466	54.6656	227/18/2051	2018-08-21	Norflurazon	µg/dm3	0.1	p.0,1	-	1	Eurofins	SFBA0-7
69	18.466	54.6656	227/18/2051	2018-08-21	Nuarimol	µg/dm3	0.1	p.0,1	-	1	Eurofins	SFBA0-7
69	18.466	54.6656	227/18/2051	2018-08-21	Ometoat	µg/dm3	0.1	p.0,1	-	1	Eurofins	SFBA0-7
69	18.466	54.6656	227/18/2051	2018-08-21	Oxadiazon	µg/dm3	0.1	p.0,1	-	1	Eurofins	SFBA0-7
69	18.466	54.6656	227/18/2051	2018-08-21	Oxydemeton-methyl	µg/dm3	0.1	p.0,1	-	1	Eurofins	SFBA0-7
69	18.466	54.6656	227/18/2051	2018-08-21	Oksyfluoroten	µg/dm3	0.1	p.0,1	-	1	Eurofins	SFBA0-7
69	18.466	54.6656	227/18/2051	2018-08-21	Paklobutrazol	µg/dm3	0.1	p.0,1	-	1	Eurofins	SFBA0-7
69	18.466	54.6656	227/18/2051	2018-08-21	Paraoxon-ethyl	µg/dm3	0.1	p.0,1	-	1	Eurofins	SFBA0-7
69	18.466	54.6656	227/18/2051	2018-08-21	Paraokson metylowy	µg/dm3	0.1	p.0,1	-	1	Eurofins	SFBA0-7
69	18.466	54.6656	227/18/2051	2018-08-21	Paration	µg/dm3	0.1	p.0,1	-	1	Eurofins	SFBA0-7
69	18.466	54.6656	227/18/2051	2018-08-21	Paration metylu	µg/dm3	0.1	p.0,1	-	1	Eurofins	SFBA0-7
69	18.466	54.6656	227/18/2051	2018-08-21	Paration metylu/Paraokson metylu (suma)	µg/dm3	0.1	p.0,1	-	1	Eurofins	SFBA0-7
69	18.466	54.6656	227/18/2051	2018-08-21	PCB IUPAC 101	µg/dm3	0.05	p.0,05	-	1	Eurofins	SFBA0-7
69	18.466	54.6656	227/18/2051	2018-08-21	PCB 118	µg/dm3	0.05	p.0,05	-	1	Eurofins	SFBA0-7
69	18.466	54.6656	227/18/2051	2018-08-21	PCB 138	µg/dm3	0.05	p.0,05	-	1	Eurofins	SFBA0-7
69	18.466	54.6656	227/18/2051	2018-08-21	PCB 153	µg/dm3	0.05	p.0,05	-	1	Eurofins	SFBA0-7
69	18.466	54.6656	227/18/2051	2018-08-21	PCB 180	µg/dm3	0.05	p.0,05	-	1	Eurofins	SFBA0-7
69	18.466	54.6656	227/18/2051	2018-08-21	PCB 28	µg/dm3	0.05	p.0,05	-	1	Eurofins	SFBA0-7
69	18.466	54.6656	227/18/2051	2018-08-21	PCB 52	µg/dm3	0.05	p.0,05	-	1	Eurofins	SFBA0-7
69	18.466	54.6656	227/18/2051	2018-08-21	Penkonazol	µg/dm3	0.1	p.0,1	-	1	Eurofins	SFBA0-7
69	18.466	54.6656	227/18/2051	2018-08-21	Pendimetalina	µg/dm3	0.1	p.0,1	-	1	Eurofins	SFBA0-7
69	18.466	54.6656	227/18/2051	2018-08-21	Pentachloranisol	µg/dm3	0.1	p.0,1	-	1	Eurofins	SFBA0-7
69	18.466	54.6656	227/18/2051	2018-08-21	Pentachloraniline	µg/dm3	0.1	p.0,1	-	1	Eurofins	SFBA0-7
69	18.466	54.6656	227/18/2051	2018-08-21	Pentachlorobenzen	µg/dm3	0.1	p.0,1	-	1	Eurofins	SFBA0-7
69	18.466	54.6656	227/18/2051	2018-08-21	Pentachlorothioanisole	µg/dm3	0.1	p.0,1	-	1	Eurofins	SFBA0-7
69	18.466	54.6656	227/18/2051	2018-08-21	Permetryna	µg/dm3	0.1	p.0,1	-	1	Eurofins	SFBA0-7
69	18.466	54.6656	227/18/2051	2018-08-21	Pertan	µg/dm3	0.1	p.0,1	-	1	Eurofins	SFBA0-7
69	18.466	54.6656	227/18/2051	2018-08-21	Phenkapton	µg/dm3	0.1	p.0,1	-	1	Eurofins	SFBA0-7
69	18.466	54.6656	227/18/2051	2018-08-21	Phenothrin	µg/dm3	0.1	p.0,1	-	1	Eurofins	SFBA0-7
69	18.466	54.6656	227/18/2051	2018-08-21	Fentoat	µg/dm3	0.1	p.0,1	-	1	Eurofins	SFBA0-7
69	18.466	54.6656	227/18/2051	2018-08-21	Fosalon	µg/dm3	0.1	p.0,1	-	1	Eurofins	SFBA0-7
69	18.466	54.6656	227/18/2051	2018-08-21	Phosfolane	µg/dm3	0.1	p.0,1	-	1	Eurofins	SFBA0-7
69	18.466	54.6656	227/18/2051	2018-08-21	Fosmet	µg/dm3	0.1	p.0,1	-	1	Eurofins	SFBA0-7
69	18.466	54.6656	227/18/2051	2018-08-21	Picolinafen	µg/dm3	0.1	p.0,1	-	1	Eurofins	SFBA0-7
69	18.466	54.6656	227/18/2051	2018-08-21	Pikoksystrobina	µg/dm3	0.1	p.0,1	-	1	Eurofins	SFBA0-7
69	18.466	54.6656	227/18/2051	2018-08-21	Piperophos	µg/dm3	0.1	p.0,1	-	1	Eurofins	SFBA0-7
69	18.466	54.6656	227/18/2051	2018-08-21	Pirymifos metylowy	µg/dm3	0.1	p.0,1	-	1	Eurofins	SFBA0-7
69	18.466	54.6656	227/18/2051	2018-08-21	Pirymifos etylu	µg/dm3	0.1	p.0,1	-	1	Eurofins	SFBA0-7
69	18.466	54.6656	227/18/2051	2018-08-21	Plifenate	µg/dm3	0.1	p.0,1	-	1	Eurofins	SFBA0-7
69	18.466	54.6656	227/18/2051	2018-08-21	Praletryna	µg/dm3	0.1	p.0,1	-	1	Eurofins	SFBA0-7
69	18.466	54.6656	227/18/2051	2018-08-21	Procymidon	µg/dm3	0.1	p.0,1	-	1	Eurofins	SFBA0-7
69	18.466	54.6656	227/18/2051	2018-08-21	Profenfos	µg/dm3	0.1	p.0,1	-	1	Eurofins	SFBA0-7
69	18.466	54.6656	227/18/2051	2018-08-21	Profluralina	µg/dm3	0.1	p.0,1	-	1	Eurofins	SFBA0-7
69	18.466	54.6656	227/18/2051	2018-08-21	Propachlor	µg/dm3	0.1	p.0,1	-	1	Eurofins	SFBA0-7
69	18.466	54.6656	227/18/2051	2018-08-21	Propanil	µg/dm3	0.1	p.0,1	-	1	Eurofins	SFBA0-7
69	18.466	54.6656	227/18/2051	2018-08-21	Propazyna	µg/dm3	0.1	p.0,1	-	1	Eurofins	SFBA0-7
69	18.466	54.6656	227/18/2051	2018-08-21	Propetamfos	µg/dm3	0.1	p.0,1	-	1	Eurofins	SFBA0-7
69	18.466	54.6656	227/18/2051	2018-08-21	Propikonazol	µg/dm3	0.1	p.0,1	-	1	Eurofins	SFBA0-7
69	18.466	54.6656	227/18/2051	2018-08-21	Propyzamid	µg/dm3	0.1	p.0,1	-	1	Eurofins	SFBA0-7
69	18.466	54.6656	227/18/2051	2018-08-21	Protiofos	µg/dm3	0.1	p.0,1	-	1	Eurofins	SFBA0-7
69	18.466	54.6656	227/18/2051	2018-08-21	Prothoat	µg/dm3	0.1	p.0,1	-	1	Eurofins	SFBA0-7
69	18.466	54.6656	227/18/2051	2018-08-21	Pyraclofos	µg/dm3	0.1	p.0,1	-	1	Eurofins	SFBA0-7
69	18.466	54.6656	227/18/2051	2018-08-21	Pyraflufen-ethyl	µg/dm3	0.1	p.0,1	-	1	Eurofins	SFBA0-7
69	18.466	54.6656	227/18/2051	2018-08-21	Pirazofos	µg/dm3	0.1	p.0,1	-	1	Eurofins	SFBA0-7
69	18.466	54.6656	227/18/2051	2018-08-21	Pyretryny	µg/dm3	0.1	p.0,1	-	1	Eurofins	SFBA0-7
69	18.466	54.6656	227/18/2051	2018-08-21	Pirydaben	µg/dm3	0.1	p.0,1	-	1	Eurofins	SFBA0-7
69	18.466	54.6656	227/18/2051	2018-08-21	Pyridaphenthion	µg/dm3	0.1	p.0,1	-	1	Eurofins	SFBA0-7
69	18.466	54.6656	227/18/2051	2018-08-21	Pyrifenox	µg/dm3	0.1	p.0,1	-	1	Eurofins	SFBA0-7
69	18.466	54.6656	227/18/2051	2018-08-21	Pirimithate	µg/dm3	0.1	p.0,1	-	1	Eurofins	SFBA0-7
69	18.466	54.6656	227/18/2051	2018-08-21	Chinalofos	µg/dm3	0.1	p.0,1	-	1	Eurofins	SFBA0-7
69	18.466	54.6656	227/18/2051	2018-08-21	Chinoksyfen	µg/dm3	0.1	p.0,1	-	1	Eurofins	SFBA0-7
69	18.466	54.6656	227/18/2051	2018-08-21	Kwintocen	µg/dm3	0.1	p.0,1	-	1	Eurofins	SFBA0-7
69	18.466	54.6656	227/18/2051	2018-08-21	Quintozene (suma)	µg/dm3	0.1	p.0,1	-	1	Eurofins	SFBA0-7
69	18.466	54.6656	227/18/2051	2018-08-21	Chizalofop etylowy	µg/dm3	0.1	p.0,1	-	1	Eurofins	SFBA0-7
69	18.466	54.6656	227/18/2051	2018-08-21	Resmetryna	µg/dm3	0.1	p.0,1	-	1	Eurofins	SFBA0-7
69	18.466	54.6656	227/18/2051	2018-08-21	S421 Octachlordipropyleter)	µg/dm3	0.1	p.0,1	-	1	Eurofins	SFBA0-7
69	18.466	54.6656	227/18/2051	2018-08-21	Spiromesifen	µg/dm3	0.1	p.0,1	-	1	Eurofins	SFBA0-7
69	18.466	54.6656	227/18/2051	2018-08-21	Sulfotep	µg/dm3	0.1	p.0,1	-	1	Eurofins	SFBA0-7
69	18.466	54.6656	227/18/2051	2018-08-21	Sulprofos	µg/dm3	0.1	p.0,1	-	1	Eurofins	SFBA0-7
69	18.466	54.6656	227/18/2051	2018-08-21	Swep	µg/dm3	0.1	p.0,1	-	1	Eurofins	SFBA0-7
69	18.466	54.6656	227/18/2051	2018-08-21	tau-Fluvalinate	µg/dm3	0.1	p.0,1	-	1	Eurofins	SFBA0-7
69	18.466	54.6656	227/18/2051	2018-08-21	Tebupirimfos	µg/dm3	0.1	p.0,1	-	1	Eurofins	SFBA0-7
69	18.466	54.6656	227/18/2051	2018-08-21	Technazen	µg/dm3	0.1	p.0,1	-	1	Eurofins	SFBA0-7
69	18.466	54.6656	227/18/2051	2018-08-21	Teflutryna	µg/dm3	0.1	p.0,1	-	1	Eurofins	SFBA0-7
69	18.466	54.6656	227/18/2051	2018-08-21	Temephos	µg/dm3	0.1	p.0,1	-	1	Eurofins	SFBA0-7
69	18.466	54.6656	227/18/2051	2018-08-21	Terbufos	µg/dm3	0.1	p.0,1	-	1	Eurofins	SFBA0-7
69	18.466	54.6656	227/18/2051	2018-08-21	Tetrachlorwinfos	µg/dm3	0.1	p.0,1	-	1	Eurofins	SFBA0-7
69	18.466	54.6656	227/18/2051	2018-08-21	Tetrakonazol	µg/dm3	0.1	p.0,1	-	1	Eurofins	SFBA0-7
69	18.466	54.6656	227/18/2051	2018-08-21	Tetradifon	µg/dm3	0.1	p.0,1	-	1	Eurofins	SFBA0-7
69	18.466	54.6656	227/18/2051	2018-08-21	Tetrametryna	µg/dm3	0.1	p.0,1	-	1	Eurofins	SFBA0-7
69	18.466	54.6656	227/18/2051	2018-08-21	Tetrasul	µg/dm3	0.1	p.0,1	-	1	Eurofins	SFBA0-7
69	18.466	54.6656	227/18/2051	2018-08-21	Tolklofos metylu	µg/dm3	0.1	p.0,1	-	1	Eurofins	SFBA0-7
69	18.466	54.6656	227/18/2051	2018-08-21	Tolilofluanid	µg/dm3	0.1	p.0,1	-	1	Eurofins	SFBA0-7
69	18.466	54.6656	227/18/2051	2018-08-21	Toxaphene Parlar 26	µg/dm3	0.05	p.0,05	-	1	Eurofins	SFBA0-7
69	18.466	54.6656	227/18/2051	2018-08-21	Toxaphene Parlar 50	µg/dm3	0.05	p.0,05	-	1	Eurofins	SFBA0-7
69	18.466	54.6656	227/18/2051	2018-08-21	Toxaphene Parlar 62	µg/dm3	0.05	p.0,05	-	1	Eurofins	SFBA0-7
69	18.466	54.6656	227/18/2051	2018-08-21	Transfluthrin	µg/dm3	0.1	p.0,1	-	1	Eurofins	SFBA0-7
69	18.466	54.6656	227/18/2051	2018-08-21	Triadimefon	µg/dm3	0.1	p.0,1	-	1	Eurofins	SFBA0-7
69	18.466	54.6656	227/18/2051	2018-08-21	Triadimenol	µg/dm3	0.1	p.0,1	-	1	Eurofins	SFBA0-7
69	18.466	54.6656	227/18/2051	2018-08-21	Triadimenol/Triadimefon(suma)	µg/dm3	0.1	p.0,1	-	1	Eurofins	SFBA0-7
69	18.466	54.6656	227/18/2051	2018-08-21	Trialat	µg/dm3	0.1	p.0,1	-	1	Eurofins	SFBA0-7
69	18.466	54.6656	227/18/2051	2018-08-21	Triamiphos	µg/dm3	0.1	p.0,1	-	1	Eurofins	SFBA0-7
69	18.466	54.6656	227/18/2051	2018-08-21	Triazofos	µg/dm3	0.1	p.0,1	-	1	Eurofins	SFBA0-7
69	18.466	54.6656	227/18/2051	2018-08-21	Tribufos	µg/dm3	0.1	p.0,1	-	1	Eurofins	SFBA0-7
69	18.466	54.6656	227/18/2051	2018-08-21	Trichloronat	µg/dm3	0.1	p.0,1	-	1	Eurofins	SFBA0-7
69	18.466	54.6656	227/18/2051	2018-08-21	Tridiphane	µg/dm3	0.1	p.0,1	-	1	Eurofins	SFBA0-7
69	18.466	54.6656	227/18/2051	2018-08-21	Trifloksystrobina	µg/dm3	0.1	p.0,1	-	1	Eurofins	SFBA0-7
69	18.466	54.6656	227/18/2051	2018-08-21	Trifluralina	µg/dm3	0.1	p.0,1	-	1	Eurofins	SFBA0-7
69	18.466	54.6656	227/18/2051	2018-08-21	Vamidothion	µg/dm3	0.1	p.0,1	-	1	Eurofins	SFBA0-7
69	18.466	54.6656	227/18/2051	2018-08-21	Winklozolina	µg/dm3	0.1	p.0,1	-	1	Eurofins	SFBA0-7
69	18.466	54.6656	227/18/2051	2018-08-21	Glifosat	µg/dm3	0.02	p.0,02	-	1	Eurofins	SFBA0-7
69	18.466	54.6656	227/18/2051	2018-08-21	Glufosynat	µg/dm3	0.02	p.0,02	-	1	Eurofins	SF130
69	18.466	54.6656	227/18/2051	2018-08-21	Kwas aminometylofosfonowy (AMPA)	µg/dm3	0.02	p.0,02	-	1	Eurofins	SF130
56	18.3643	54.6602	227/18/2048	2018-08-21	Glifosat	µg/dm3	0.02	0.021	0.0105	0	Eurofins	SF130
56	18.3643	54.6602	227/18/2048	2018-08-21	Glufosynat	µg/dm3	0.02	p.0,02	-	1	Eurofins	SF130
56	18.3643	54.6602	227/18/2048	2018-08-21	Kwas aminometylofosfonowy (AMPA)	µg/dm3	0.02	p.0,02	-	1	Eurofins	SF130
8	18.4409	54.7011	227/18/2040	2018-08-21	Glifosat	µg/dm3	0.02	p.0,02	-	1	Eurofins	SF130
8	18.4409	54.7011	227/18/2040	2018-08-21	Glufosynat	µg/dm3	0.02	p.0,02	-	1	Eurofins	SF130
8	18.4409	54.7011	227/18/2040	2018-08-21	Kwas aminometylofosfonowy (AMPA)	µg/dm3	0.02	p.0,02	-	1	Eurofins	SF130
31	18.3392	54.6727	227/18/2047	2018-08-21	Glifosat	µg/dm3	0.02	p.0,02	-	1	Eurofins	SF130
31	18.3392	54.6727	227/18/2047	2018-08-21	Glufosynat	µg/dm3	0.02	p.0,02	-	1	Eurofins	SF130
31	18.3392	54.6727	227/18/2047	2018-08-21	Kwas aminometylofosfonowy (AMPA)	µg/dm3	0.02	0.11	0.055	0	Eurofins	SF130
